# Supplementary material for: Developing a Molecular Roadmap of Drug-Food Interactions
Source: PLoS Comput Biol. 2015 Feb 10;11(2):e1004048. doi: 10.1371/journal.pcbi.1004048 (PMC4323218; doi:10.1371/journal.pcbi.1004048)
Supplement: S1 Table — Number of phytochemicals, total number of interacting proteins and number of common interacting proteins between two foods. (XLSX) [file pcbi.1004048.s001.xlsx]

## Sheet: table_s1_figure1.tsv
Number of compounds	Number of proteins	Number of common interacting proteins	Endive	Guava	Cinnamon	White-Pepper	Chicory	Black-Salsify	Coconut	Lychee	Mung-Beans	Chard	Cashew	Red-Currant	Lingonberry	Pomegranate	Prickly-Pear	Lemon	Orange	Grape	Mangos	Loquat	Raspberry	Cress	Pine-Nut	Avocado	Poppy-Seed	Fig	Spinach	Persimmon	Buckwheat	Rhubarb	Kiwifruit	Cotton-Seed	Cocoa	Brazil-Nut	Papaya	Muskmelon	Cucumber	Quinces	Swede	Turnip	Kohlrabi	Radish	Strawberry	Apple	Almond	Prune	Peach
9	64	Endive		61	31	45	61	8	18	49	33	27	36	62	57	57	1	4	11	59	61	36	56	14	2	27	58	11	29	60	60	51	14	10	27	2	16	1	56	57	62	62	59	9	64	8	13	2	19
20	85	Guava	61		32	50	62	6	18	66	34	31	38	70	66	73	2	4	14	69	78	41	70	17	2	39	69	12	28	71	66	56	15	8	33	3	23	1	61	68	73	70	64	10	81	9	14	3	27
6	33	Cinnamon	31	32		27	31	4	13	30	19	21	23	30	29	28	1	4	8	31	31	28	28	8	2	21	29	6	21	32	30	31	10	6	22	2	11	1	27	29	32	31	30	9	32	6	10	2	13
21	68	White-Pepper	45	50	27		46	6	15	43	34	27	33	52	49	47	2	4	14	50	48	33	45	17	2	25	56	12	28	49	48	48	15	8	25	2	20	1	44	48	54	52	44	13	52	9	13	3	25
15	64	Chicory	61	62	31	46		6	18	47	33	29	34	60	58	58	2	4	12	61	61	34	56	15	2	27	60	12	28	62	60	50	15	8	27	3	17	2	56	57	62	62	59	10	62	9	14	2	21
2	8	Black-Salsify	8	6	4	6	6		2	7	5	3	8	8	6	6	0	0	2	6	8	8	6	1	1	4	6	1	3	6	6	8	2	7	3	0	1	0	6	6	6	6	6	1	8	0	1	0	1
3	19	Coconut	18	18	13	15	18	2		16	12	11	12	19	16	17	2	0	1	16	16	13	15	3	0	10	18	1	11	16	19	18	3	2	10	2	2	0	15	16	19	19	15	2	19	1	2	0	1
20	75	Lychee	49	66	30	43	47	7	16		30	30	35	58	53	60	1	4	9	54	67	39	60	15	2	36	59	8	28	57	55	48	13	11	30	2	18	1	51	57	58	53	51	11	69	9	14	4	26
13	52	Mung-Beans	33	34	19	34	33	5	12	30		24	26	37	35	37	1	3	10	35	35	24	31	12	2	24	39	13	31	33	37	38	10	8	26	1	18	1	31	32	37	39	31	6	38	8	12	2	18
7	34	Chard	27	31	21	27	29	3	11	30	24		21	29	29	31	1	3	7	30	31	23	28	9	2	21	30	9	23	29	30	29	11	7	21	3	12	1	27	28	28	29	27	7	30	7	10	2	18
19	44	Cashew	36	38	23	33	34	8	12	35	26	21		39	37	36	1	4	10	36	40	29	36	14	1	26	37	9	20	39	38	34	12	9	23	0	15	1	35	37	37	40	35	8	39	6	10	3	18
9	79	Red-Currant	62	70	30	52	60	8	19	58	37	29	39		71	63	2	4	14	72	70	42	61	16	2	33	70	12	31	68	68	61	14	10	33	3	24	1	60	66	72	73	61	10	79	9	13	3	26
9	72	Lingonberry	57	66	29	49	58	6	16	53	35	29	37	71		59	2	4	14	69	66	36	62	15	2	30	66	12	29	65	62	56	13	8	30	3	21	1	61	63	67	71	62	9	72	9	11	3	23
21	78	Pomegranate	57	73	28	47	58	6	17	60	37	31	36	63	59		2	4	13	63	69	38	66	16	2	38	65	12	30	61	63	50	14	9	32	3	20	1	56	62	63	60	56	9	71	9	13	2	25
1	2	Prickly-Pear	1	2	1	2	2	0	2	1	1	1	1	2	2	2		0	1	2	2	1	1	1	0	0	2	1	0	1	2	2	0	0	0	1	2	0	1	1	2	2	1	0	2	1	0	0	1
2	4	Lemon	4	4	4	4	4	0	0	4	3	3	4	4	4	4	0		2	4	4	4	4	3	0	3	4	2	4	4	4	4	4	1	3	0	3	1	4	4	4	4	4	3	4	3	3	1	4
6	15	Orange	11	14	8	14	12	2	1	9	10	7	10	14	14	13	1	2		13	14	8	13	11	2	8	14	8	5	13	13	12	5	1	11	1	9	1	12	13	14	13	12	7	14	3	6	0	7
13	77	Grape	59	69	31	50	61	6	16	54	35	30	36	72	69	63	2	4	13		70	39	60	15	2	34	67	12	29	68	65	60	14	8	33	3	23	1	58	63	69	70	61	10	75	9	11	3	26
18	85	Mangos	61	78	31	48	61	8	16	67	35	31	40	70	66	69	2	4	14	70		43	70	16	2	39	69	12	27	73	65	58	14	10	33	3	23	1	61	67	70	68	64	10	82	9	11	3	28
16	46	Loquat	36	41	28	33	34	8	13	39	24	23	29	42	36	38	1	4	8	39	43		33	9	2	30	39	6	22	43	39	40	13	9	29	2	15	1	32	39	39	38	33	9	42	7	9	2	19
10	71	Raspberry	56	70	28	45	56	6	15	60	31	28	36	61	62	66	1	4	13	60	70	33		14	2	34	62	11	27	62	58	47	13	8	28	2	18	1	61	63	62	61	61	9	70	8	11	3	21
7	26	Cress	14	17	8	17	15	1	3	15	12	9	14	16	15	16	1	3	11	15	16	9	14		2	7	20	9	6	16	17	15	6	2	12	1	10	1	13	15	18	16	13	10	16	3	9	2	11
1	2	Pine-Nut	2	2	2	2	2	1	0	2	2	2	1	2	2	2	0	0	2	2	2	2	2	2		2	2	2	2	2	2	2	1	1	2	0	2	0	2	2	2	2	2	2	2	0	2	0	2
6	78	Avocado	27	39	21	25	27	4	10	36	24	21	26	33	30	38	0	3	8	34	39	30	34	7	2		32	6	23	35	32	30	9	5	28	1	13	1	27	32	31	34	27	7	39	6	8	2	18
34	101	Poppy-Seed	58	69	29	56	60	6	18	59	39	30	37	70	66	65	2	4	14	67	69	39	62	20	2	32		12	31	69	67	57	15	9	35	3	23	1	61	67	71	68	61	12	71	9	14	3	30
3	15	Fig	11	12	6	12	12	1	1	8	13	9	9	12	12	12	1	2	8	12	12	6	11	9	2	6	12		8	11	12	12	7	4	9	1	15	1	11	11	12	12	11	5	12	5	8	1	9
12	34	Spinach	29	28	21	28	28	3	11	28	31	23	20	31	29	30	0	4	5	29	27	22	27	6	2	23	31	8		27	31	30	9	7	22	1	12	1	27	27	30	31	27	5	31	7	10	2	15
13	77	Persimmon	60	71	32	49	62	6	16	57	33	29	39	68	65	61	1	4	13	68	73	43	62	16	2	35	69	11	27		65	55	16	8	33	2	22	2	61	68	70	70	64	11	71	8	13	3	28
23	74	Buckwheat	60	66	30	48	60	6	19	55	37	30	38	68	62	63	2	4	13	65	65	39	58	17	2	32	67	12	31	65		53	14	9	33	3	22	1	57	63	69	65	58	10	69	9	14	3	26
24	75	Rhubarb	51	56	31	48	50	8	18	48	38	29	34	61	56	50	2	4	12	60	58	40	47	15	2	30	57	12	30	55	53		15	11	30	3	20	1	45	48	57	61	48	10	64	8	13	3	23
6	16	Kiwifruit	14	15	10	15	15	2	3	13	10	11	12	14	13	14	0	4	5	14	14	13	13	6	1	9	15	7	9	16	14	15		4	7	1	9	1	13	15	14	15	13	8	14	6	9	1	12
4	11	Cotton-Seed	10	8	6	8	8	7	2	11	8	7	9	10	8	9	0	1	1	8	10	9	8	2	1	5	9	4	7	8	9	11	4		5	0	4	0	8	8	8	8	8	2	10	3	4	1	4
4	41	Cocoa	27	33	22	25	27	3	10	30	26	21	23	33	30	32	0	3	11	33	33	29	28	12	2	28	35	9	22	33	33	30	7	5		1	16	1	27	31	34	30	27	7	33	6	9	2	17
1	3	Brazil-Nut	2	3	2	2	3	0	2	2	1	3	0	3	3	3	1	0	1	3	3	2	2	1	0	1	3	1	1	2	3	3	1	0	1		1	0	2	2	3	3	2	0	3	1	0	0	2
4	27	Papaya	16	23	11	20	17	1	2	18	18	12	15	24	21	20	2	3	9	23	23	15	18	10	2	13	23	15	12	22	22	20	9	4	16	1		1	18	22	24	21	18	6	24	7	10	3	19
2	2	Muskmelon	1	1	1	1	2	0	0	1	1	1	1	1	1	1	0	1	1	1	1	1	1	1	0	1	1	1	1	2	1	1	1	0	1	0	1		1	1	1	1	1	1	1	0	2	0	1
3	61	Cucumber	56	61	27	44	56	6	15	51	31	27	35	60	61	56	1	4	12	58	61	32	61	13	2	27	61	11	27	61	57	45	13	8	27	2	18	1		61	61	61	61	8	61	8	11	3	21
10	70	Quinces	57	68	29	48	57	6	16	57	32	28	37	66	63	62	1	4	13	63	67	39	63	15	2	32	67	11	27	68	63	48	15	8	31	2	22	1	61		67	64	61	10	68	8	12	3	27
24	88	Swede	62	73	32	54	62	6	19	58	37	28	37	72	67	63	2	4	14	69	70	39	62	18	2	31	71	12	30	70	69	57	14	8	34	3	24	1	61	67		71	64	10	75	9	15	4	30
22	84	Turnip	62	70	31	52	62	6	19	53	39	29	40	73	71	60	2	4	13	70	68	38	61	16	2	34	68	12	31	70	65	61	15	8	30	3	21	1	61	64	71		64	9	76	9	13	3	25
14	66	Kohlrabi	59	64	30	44	59	6	15	51	31	27	35	61	62	56	1	4	12	61	64	33	61	13	2	27	61	11	27	64	58	48	13	8	27	2	18	1	61	61	64	64		9	64	8	12	3	21
5	14	Radish	9	10	9	13	10	1	2	11	6	7	8	10	9	9	0	3	7	10	10	9	9	10	2	7	12	5	5	11	10	10	8	2	7	0	6	1	8	10	10	9	9		10	3	9	1	7
30	95	Strawberry	64	81	32	52	62	8	19	69	38	30	39	79	72	71	2	4	14	75	82	42	70	16	2	39	71	12	31	71	69	64	14	10	33	3	24	1	61	68	75	76	64	10		10	13	3	26
2	10	Apple	8	9	6	9	9	0	1	9	8	7	6	9	9	9	1	3	3	9	9	7	8	3	0	6	9	5	7	8	9	8	6	3	6	1	7	0	8	8	9	9	8	3	10		6	2	8
8	18	Almond	13	14	10	13	14	1	2	14	12	10	10	13	11	13	0	3	6	11	11	9	11	9	2	8	14	8	10	13	14	13	9	4	9	0	10	2	11	12	15	13	12	9	13	6		3	12
2	4	Prune	2	3	2	3	2	0	0	4	2	2	3	3	3	2	0	1	0	3	3	2	3	2	0	2	3	1	2	3	3	3	1	1	2	0	3	0	3	3	4	3	3	1	3	2	3		4
7	44	Peach	19	27	13	25	21	1	1	26	18	18	18	26	23	25	1	4	7	26	28	19	21	11	2	18	30	9	15	28	26	23	12	4	17	2	19	1	21	27	30	25	21	7	26	8	12	4
4	37	Peanut	25	30	20	28	26	3	11	28	25	23	21	36	36	27	2	4	6	36	31	23	27	5	0	21	31	7	23	29	29	36	10	5	20	2	14	1	27	28	31	36	27	4	37	8	8	3	15
29	96	Beansprout	59	73	29	55	60	6	19	61	41	32	40	73	68	67	2	4	15	69	71	40	63	18	2	36	75	12	33	70	69	61	16	9	36	3	24	1	61	70	76	73	61	11	79	9	15	3	30
11	57	Sprouted-Lentil	48	52	31	39	46	6	17	51	31	29	31	51	44	49	1	4	7	49	52	39	43	10	2	30	48	8	29	50	51	46	13	10	28	2	16	1	41	47	51	48	44	9	55	8	12	2	22
2	4	Alfalfa	4	4	2	3	4	1	1	4	3	3	2	4	4	4	0	0	1	4	4	2	4	1	1	3	4	2	3	4	4	4	3	2	1	1	2	0	4	4	4	4	4	1	4	1	2	0	2
11	62	White-Bean	58	58	27	44	57	6	17	49	36	28	34	59	57	59	1	4	11	57	58	32	57	13	2	28	59	11	31	56	60	47	13	9	28	2	16	1	56	56	59	59	56	8	61	8	12	2	19
31	86	Sugar-Pea	58	69	28	51	58	6	18	57	39	29	40	70	66	64	2	4	14	66	69	39	62	16	2	35	72	12	31	68	67	54	14	9	34	3	24	1	61	67	71	71	61	9	75	9	13	3	28
4	7	Adzuki-Bean	7	7	7	6	7	1	1	7	4	7	4	7	7	7	0	1	4	7	7	7	7	2	1	6	7	3	5	7	7	7	5	1	6	2	4	1	7	7	7	7	7	3	7	1	3	0	6
14	44	Cassava	39	38	25	34	38	7	13	36	29	27	30	40	37	38	1	3	10	38	40	28	35	14	2	21	41	9	23	38	38	41	9	10	25	2	13	1	35	35	39	39	36	8	40	5	11	2	17
17	49	Linseed	35	37	24	35	35	5	13	32	30	22	34	38	37	36	1	4	9	36	36	29	35	13	2	26	40	11	25	38	38	39	15	7	25	1	17	1	35	37	39	43	35	8	38	8	12	3	17
3	4	Carrot	2	3	2	2	2	1	0	4	3	3	2	3	2	4	0	1	2	3	3	3	2	2	1	3	4	2	3	3	4	3	2	2	3	0	3	1	2	3	3	2	2	2	3	0	2	0	3
5	18	Parsnip	14	15	9	15	15	1	1	11	15	12	11	15	15	15	1	3	10	15	15	9	14	10	2	9	15	15	11	14	15	15	9	4	12	1	17	1	14	14	15	15	14	6	15	6	9	1	12
32	86	Celery	61	73	32	50	61	6	18	59	39	29	38	70	66	65	2	4	14	68	71	39	63	18	2	33	70	15	32	70	68	55	14	8	33	3	26	1	61	69	75	70	64	9	77	9	14	4	30
21	76	Coriander	58	67	30	50	59	6	18	55	36	28	40	66	64	61	2	4	14	62	66	38	62	18	2	34	68	15	29	67	63	51	15	8	30	3	24	1	61	66	67	69	61	10	67	9	13	3	26
22	74	Sweet-Pepper	57	67	28	53	59	6	17	54	35	30	37	66	62	64	2	4	14	64	67	38	61	15	2	33	68	12	29	66	64	49	15	8	31	3	23	1	59	67	68	63	59	10	67	9	12	3	31
3	25	Chili-Pepper	18	18	12	23	19	1	0	18	17	15	11	19	19	18	0	3	6	20	22	17	18	6	2	15	22	8	15	22	19	21	10	4	14	1	13	1	18	19	21	20	18	7	19	7	10	2	20
27	93	Tomato	59	69	29	54	59	6	19	59	38	30	38	75	70	64	2	4	13	71	67	39	61	18	2	34	74	12	32	67	70	60	14	9	33	3	24	1	60	66	72	72	60	12	76	9	14	4	28
1	3	Chervil	3	3	3	3	3	1	0	3	3	3	3	3	3	3	0	2	2	3	3	3	3	3	1	3	3	3	3	3	3	3	3	2	3	0	3	1	3	3	3	3	3	3	3	1	3	1	3
3	32	Dill	21	25	11	30	21	2	6	19	17	10	15	26	23	23	2	2	12	24	23	12	21	13	2	9	26	9	10	22	24	22	8	3	12	1	14	0	20	22	27	24	20	10	26	5	8	1	11
9	37	Aubergine	35	34	32	29	33	7	14	33	20	21	27	34	31	30	1	4	8	33	35	32	30	9	2	21	31	6	21	34	32	35	11	9	22	2	11	1	29	31	34	33	32	10	36	6	10	2	13
21	69	Potato	47	51	32	42	44	7	18	51	28	25	31	52	44	45	1	4	8	49	50	39	41	14	2	29	51	7	28	49	50	48	12	9	31	2	16	1	40	45	53	48	43	12	54	7	14	4	21
9	34	Sweetpotato	31	31	29	26	31	4	13	28	21	22	22	29	28	27	1	4	6	30	30	28	27	7	2	22	28	7	23	32	29	31	12	6	21	2	12	1	27	28	31	33	30	8	31	6	10	2	14
4	30	Sorrel	25	30	21	23	25	4	9	30	20	20	20	30	27	29	0	3	7	30	30	29	26	6	2	27	29	5	20	30	30	26	6	5	27	1	12	1	25	29	29	26	25	7	30	5	7	2	14
18	78	Olive	61	74	32	50	62	6	18	58	34	30	38	69	65	65	2	4	14	67	71	41	63	17	2	32	69	12	28	71	67	54	15	8	31	3	23	1	61	70	73	69	64	10	73	9	14	4	30
4	17	Sesame-Seed	15	17	12	17	16	3	5	15	13	13	12	16	15	16	1	3	5	15	15	14	14	8	2	12	16	8	13	16	16	16	10	6	11	2	11	1	14	16	16	17	14	7	16	6	10	2	13
3	16	Elderberry	15	15	6	13	15	2	0	12	9	5	8	15	15	15	0	2	4	15	15	10	15	6	1	5	15	6	7	15	15	14	4	4	9	1	7	0	15	15	15	15	15	2	15	3	3	1	6
14	78	Safflower	56	60	28	48	56	6	15	50	32	27	40	59	58	59	1	4	12	58	60	36	58	16	2	33	63	11	27	61	59	46	14	8	30	2	18	1	57	60	59	62	57	11	59	8	11	2	23
3	4	Artichoke	3	3	2	2	3	1	0	3	4	2	3	3	3	3	0	1	2	3	3	2	3	2	1	2	3	2	3	3	3	2	2	1	2	0	2	1	3	3	3	4	3	2	3	0	2	0	3
19	75	Lettuce	59	63	29	53	59	6	19	50	35	28	38	64	61	61	2	4	13	60	59	35	58	17	2	31	64	13	30	60	62	51	15	8	28	3	20	1	57	60	64	66	57	11	64	9	13	2	22
42	101	Camellia-Tea	63	76	32	55	63	8	18	63	38	31	42	78	72	66	2	4	15	75	77	45	63	21	2	35	75	12	30	75	69	67	16	10	40	3	24	1	61	70	78	77	64	13	82	9	15	4	35
12	59	Oat	44	45	32	40	44	4	17	40	39	25	31	43	40	41	1	4	11	43	44	30	39	17	2	25	45	11	28	45	44	46	13	7	27	2	16	1	38	40	47	45	41	13	45	7	14	3	20
14	42	Barley	33	38	29	28	33	4	11	36	24	25	24	36	33	35	1	4	7	38	38	33	31	6	2	29	36	8	26	38	37	35	11	8	29	2	16	1	30	34	37	34	33	7	38	8	11	2	18
25	81	Rice	61	66	29	51	59	8	19	57	38	29	40	69	65	62	2	4	15	62	66	37	62	18	2	30	70	12	31	64	64	56	14	11	31	3	20	1	61	64	70	69	61	10	70	9	14	3	25
10	33	Rye	30	30	20	26	30	3	15	26	25	19	24	30	28	29	1	3	6	28	28	20	27	9	1	16	30	10	22	29	30	30	11	6	17	1	12	1	27	28	30	30	28	6	30	4	8	1	9
13	77	Wheat	60	64	29	49	59	8	17	55	37	30	38	71	68	59	2	4	12	68	65	37	59	16	2	29	66	13	31	63	64	59	14	11	30	3	22	1	59	61	67	70	60	10	72	9	12	3	23
28	81	Maize	62	74	32	51	62	6	19	59	39	30	36	72	67	66	2	4	14	69	70	38	63	17	2	33	72	12	33	69	68	58	14	9	33	3	23	1	61	67	75	71	64	10	76	9	15	3	27
17	77	Onion	60	66	28	46	57	8	17	58	41	27	37	68	62	61	1	4	12	62	66	37	61	14	2	31	67	11	31	64	63	51	13	10	32	2	21	1	61	64	68	64	61	8	69	8	13	3	25
15	73	Leek	64	70	32	48	61	8	18	58	33	27	38	70	63	61	1	4	13	65	70	40	62	15	2	31	67	11	29	69	65	54	14	10	31	2	21	1	61	66	71	67	64	10	73	8	13	3	24
18	72	Garlic	59	60	30	48	60	6	18	49	37	30	35	63	61	61	2	4	13	62	60	34	57	15	2	28	65	12	32	59	62	52	14	9	30	3	17	1	56	57	62	62	58	10	63	9	12	2	21
39	87	Fennel	58	67	30	53	61	6	18	57	36	29	41	66	64	61	2	4	14	63	67	38	62	20	2	34	70	15	29	69	64	53	16	8	30	3	24	2	61	66	68	69	62	14	67	9	16	4	29
33	80	Licorice	53	61	32	55	52	7	18	55	40	29	37	61	55	55	2	4	15	57	62	40	50	21	2	29	64	12	31	60	58	56	14	10	34	3	23	1	49	56	65	60	52	12	65	9	14	2	28
7	59	Dandelion	57	58	28	43	57	6	16	48	32	27	35	59	58	56	1	4	11	57	57	33	57	14	2	27	59	11	28	58	59	45	14	8	28	2	17	1	57	58	59	59	57	9	59	8	12	2	20
13	37	Nutmeg	27	30	20	28	28	4	13	24	26	18	24	29	28	30	1	3	12	28	29	20	27	13	2	21	33	9	20	28	29	29	7	4	24	1	12	1	26	27	31	29	26	7	29	3	9	1	13
11	49	Walnut	40	42	30	32	37	8	17	37	24	21	32	42	34	38	1	4	7	38	42	38	34	8	2	30	39	6	23	42	40	40	13	9	25	2	15	1	33	38	42	43	36	8	44	6	10	2	19
2	9	Pistachio-Nut	7	8	6	8	7	1	3	8	3	2	5	8	7	8	0	0	4	7	7	4	7	5	2	3	8	2	3	7	8	6	2	1	3	0	2	0	6	7	8	7	6	5	8	0	4	0	2
2	27	Tamarind	22	27	21	21	22	3	9	27	19	20	19	27	24	26	0	3	7	27	27	27	23	6	2	27	26	5	20	27	27	23	6	4	27	1	12	1	22	26	26	23	22	7	27	5	7	2	14
5	57	Watercress	45	55	31	43	46	6	13	49	29	29	32	52	49	49	2	4	11	52	55	38	47	11	2	29	51	9	26	54	50	42	13	8	27	3	20	1	45	53	54	51	48	8	55	9	11	3	28
6	67	Rosehip	57	67	29	46	57	6	16	57	31	28	37	66	63	60	1	4	13	63	66	38	62	15	2	32	66	11	27	67	63	48	14	8	32	2	21	1	61	66	66	63	61	10	67	8	12	3	24
15	74	Chives	64	70	33	48	61	8	18	59	33	27	38	70	63	61	1	4	13	65	70	40	62	15	2	31	67	11	29	69	65	54	14	10	31	2	21	1	61	66	71	67	64	10	73	8	13	3	24
4	9	Kumquats	8	9	8	9	9	0	1	8	7	8	6	9	9	9	1	4	5	9	9	8	8	5	1	7	9	5	7	8	9	9	5	1	7	2	7	1	8	8	9	9	8	5	9	6	6	2	9
7	48	Passionfruit	31	40	16	33	31	3	2	37	20	18	21	39	35	37	0	4	11	36	39	25	35	12	2	20	40	9	18	39	37	27	12	5	19	1	19	1	33	41	39	36	33	8	40	8	12	3	28
16	29	Tangerine	20	23	13	24	22	2	1	19	17	14	17	24	24	22	1	4	15	24	26	14	22	13	2	13	25	10	12	24	24	21	10	3	15	2	14	1	21	23	24	23	21	9	25	7	9	2	18
8	44	Plaintain	32	41	22	34	32	4	7	38	23	22	26	39	36	37	1	4	10	38	41	27	36	10	2	24	40	8	21	41	38	29	12	6	23	0	19	1	34	42	40	37	35	8	41	8	11	3	26
36	142	Ginger	44	62	25	48	46	5	13	56	33	26	36	54	49	58	1	4	14	52	61	32	54	21	2	72	60	15	26	55	52	45	15	7	30	2	25	1	45	54	55	55	45	13	62	9	15	4	33
[truncated: 53 more columns]
