# Supplementary material for: Developing a Molecular Roadmap of Drug-Food Interactions
Source: PLoS Comput Biol. 2015 Feb 10;11(2):e1004048. doi: 10.1371/journal.pcbi.1004048 (PMC4323218; doi:10.1371/journal.pcbi.1004048)
Supplement: S2 Table — Number of shared drug-food interactions among drug targets under the same disease category. (XLSX) [file pcbi.1004048.s002.xlsx]

## Sheet: Cancer
Shared drug-food interactions	Telomerase reverse transcriptase (O14746)	Carbonic anhydrase 12 (O43570)	Tyrosine-protein kinase JAK2 (O60674)	Tyrosine-protein kinase ABL1 (P00519)	Epidermal growth factor receptor (P00533)	Carbonic anhydrase 1 (P00915)	Carbonic anhydrase 2 (P00918)	Estrogen receptor (P03372)	27 kDa interstitial collagenase (P03956)	Receptor tyrosine-protein kinase erbB-2 (P04626)	High affinity nerve growth factor receptor (P04629)	Tyrosine-protein kinase Lck (P06239)	Tyrosine-protein kinase Fyn (P06241)	Progesterone receptor (P06401)	Heat shock protein HSP 90-alpha (P07900)	Tyrosine-protein kinase Yes (P07947)	Extracellular cell-membrane anchored RET cadherin 120 kDa fragment (P07949)	Insulin-like growth factor 1 receptor beta chain (P08069)	PEX (P08253)	Stromelysin-1 (P08254)	Hepatocyte growth factor receptor (P08581)	Platelet-derived growth factor receptor beta (P09619)	Arachidonate 5-lipoxygenase (P09917)	Androgen receptor (P10275)	Mast/stem cell growth factor receptor Kit (P10721)	DNA topoisomerase 1 (P11387)	DNA topoisomerase 2-alpha (P11388)	Vitamin D3 receptor (P11473)	Aromatase (P11511)	Proto-oncogene tyrosine-protein kinase Src (P12931)	Tissue factor (P13726)	Estradiol 17-beta-dehydrogenase 1 (P14061)	82 kDa matrix metalloproteinase-9 (P14780)	Serine/threonine-protein kinase B-raf (P15056)	Platelet-derived growth factor receptor alpha (P16234)	Protein kinase C alpha type (P17252)	3-oxo-5-alpha-steroid 4-dehydrogenase 1 (P18405)	Fibroblast growth factor receptor 3 (P22607)	Carbonic anhydrase 4 (P22748)	Carbonic anhydrase 6 (P23280)	DNA-(apurinic or apyrimidinic site) lyase, mitochondrial (P27695)	Ephrin type-A receptor 2 (P29317)	3-oxo-5-alpha-steroid 4-dehydrogenase 2 (P31213)	RAC-alpha serine/threonine-protein kinase (P31749)	Prostaglandin G/H synthase 2 (P35354)	Receptor-type tyrosine-protein kinase FLT3 (P36888)	Serine/threonine-protein kinase receptor R3 (P37023)	Peroxisome proliferator-activated receptor gamma (P37231)	Abelson tyrosine-protein kinase 2 (P42684)
Telomerase reverse transcriptase (O14746)		0	0	0	0	0	0	0	0	0	0	0	0	0	0	0	0	0	0	0	0	0	0	0	0	0	0	0	0	0	0	0	0	0	0	0	0	0	0	0	0	0	0	0	0	0	0	0	0
Carbonic anhydrase 12 (O43570)	0		0	0	0	268	268	0	0	0	0	0	0	0	0	0	0	0	0	0	0	0	0	0	0	0	0	0	0	0	0	0	0	0	0	0	0	0	268	67	0	0	0	0	0	0	0	0	0
Tyrosine-protein kinase JAK2 (O60674)	0	0		0	0	0	0	0	0	0	0	0	0	0	0	0	0	0	0	0	0	0	0	0	0	0	0	0	0	0	0	0	0	0	0	0	0	0	0	0	0	0	0	0	0	0	0	0	0
Tyrosine-protein kinase ABL1 (P00519)	0	0	0		0	0	0	0	0	0	2	4	2	0	0	2	4	0	0	0	0	9	0	0	10	0	0	0	0	15	0	0	0	3	6	0	0	2	0	0	0	4	0	2	0	3	2	0	4
Epidermal growth factor receptor (P00533)	0	0	0	0		0	0	0	0	24	0	0	0	0	0	0	0	0	0	0	0	0	0	0	0	0	0	0	0	0	0	0	0	0	0	0	0	0	0	0	0	0	0	0	0	0	0	0	0
Carbonic anhydrase 1 (P00915)	0	268	0	0	0		1296	0	0	0	0	0	0	0	0	0	0	0	0	0	0	0	0	0	0	0	0	0	0	0	0	0	0	0	0	0	0	0	1020	69	0	0	0	0	0	0	0	0	0
Carbonic anhydrase 2 (P00918)	0	268	0	0	0	1296		0	0	0	0	0	0	0	0	0	0	0	0	0	0	0	0	0	0	0	0	0	0	0	0	0	0	0	0	0	0	0	1088	69	0	0	0	0	0	0	0	0	0
Estrogen receptor (P03372)	0	0	0	0	0	0	0		0	0	0	0	0	36	0	0	0	0	0	0	0	0	0	99	0	0	0	0	0	0	0	0	0	0	0	0	1	0	0	0	0	0	0	0	0	0	0	0	0
27 kDa interstitial collagenase (P03956)	0	0	0	0	0	0	0	0		0	0	0	0	0	0	0	0	0	14	17	0	0	0	0	0	0	0	0	0	0	0	0	21	0	0	0	0	0	0	0	0	0	0	0	0	0	0	0	0
Receptor tyrosine-protein kinase erbB-2 (P04626)	0	0	0	0	24	0	0	0	0		0	0	0	0	0	0	0	0	0	0	0	0	0	0	0	0	0	0	0	0	0	0	0	0	0	0	0	0	0	0	0	0	0	0	0	0	0	0	0
High affinity nerve growth factor receptor (P04629)	0	0	0	2	0	0	0	0	0	0		0	0	0	0	0	1	0	0	0	0	2	0	0	2	0	0	0	0	0	0	0	0	1	2	0	0	0	0	0	0	1	0	0	0	0	0	0	0
Tyrosine-protein kinase Lck (P06239)	0	0	0	4	0	0	0	0	0	0	0		2	0	0	2	2	0	0	0	0	2	0	0	4	0	0	0	0	4	0	0	0	0	2	0	0	2	0	0	0	2	0	0	0	2	0	0	2
Tyrosine-protein kinase Fyn (P06241)	0	0	0	2	0	0	0	0	0	0	0	2		0	0	2	0	0	0	0	0	2	0	0	2	0	0	0	0	2	0	0	0	0	0	0	0	0	0	0	0	2	0	0	0	0	0	0	2
Progesterone receptor (P06401)	0	0	0	0	0	0	0	36	0	0	0	0	0		0	0	0	0	0	0	0	0	0	12	0	0	0	0	0	0	0	0	0	0	0	0	1	0	0	0	0	0	0	0	0	0	0	0	0
Heat shock protein HSP 90-alpha (P07900)	0	0	0	0	0	0	0	0	0	0	0	0	0	0		0	0	0	0	0	0	0	0	0	0	0	0	0	0	0	0	0	0	0	0	0	0	0	0	0	0	0	0	0	0	0	0	0	0
Tyrosine-protein kinase Yes (P07947)	0	0	0	2	0	0	0	0	0	0	0	2	2	0	0		0	0	0	0	0	2	0	0	2	0	0	0	0	2	0	0	0	0	0	0	0	0	0	0	0	2	0	0	0	0	0	0	2
Extracellular cell-membrane anchored RET cadherin 120 kDa fragment (P07949)	0	0	0	4	0	0	0	0	0	0	1	2	0	0	0	0		0	0	0	1	4	0	0	6	0	0	0	0	2	0	0	0	4	4	0	0	2	0	0	0	2	0	0	0	4	0	0	0
Insulin-like growth factor 1 receptor beta chain (P08069)	0	0	0	0	0	0	0	0	0	0	0	0	0	0	0	0	0		0	0	0	0	0	0	0	0	0	0	0	0	0	0	0	0	0	0	0	0	0	0	0	0	0	0	0	0	0	0	0
PEX (P08253)	0	0	0	0	0	0	0	0	14	0	0	0	0	0	0	0	0	0		47	0	0	0	0	0	0	0	0	0	0	0	0	98	0	0	0	0	0	0	0	0	0	0	0	0	0	0	0	0
Stromelysin-1 (P08254)	0	0	0	0	0	0	0	0	17	0	0	0	0	0	0	0	0	0	47		0	0	0	0	0	0	0	0	0	0	0	0	50	0	0	0	0	0	0	0	0	0	0	0	0	0	0	0	0
Hepatocyte growth factor receptor (P08581)	0	0	0	0	0	0	0	0	0	0	0	0	0	0	0	0	1	0	0	0		0	0	0	0	0	0	0	0	0	0	0	0	0	0	0	0	0	0	0	0	0	0	0	0	0	0	0	0
Platelet-derived growth factor receptor beta (P09619)	0	0	0	9	0	0	0	0	0	0	2	2	2	0	0	2	4	0	0	0	0		0	0	12	0	0	0	0	8	0	0	0	16	10	0	0	2	0	0	0	4	0	0	0	16	0	0	2
Arachidonate 5-lipoxygenase (P09917)	0	0	0	0	0	0	0	0	0	0	0	0	0	0	0	0	0	0	0	0	0	0		0	0	0	0	0	0	0	0	0	53	0	0	43	0	0	0	0	0	0	0	0	270	0	0	120	0
Androgen receptor (P10275)	0	0	0	0	0	0	0	99	0	0	0	0	0	12	0	0	0	0	0	0	0	0	0		0	0	0	0	0	0	0	0	0	0	0	0	1	0	0	0	0	0	0	0	0	0	0	0	0
Mast/stem cell growth factor receptor Kit (P10721)	0	0	0	10	0	0	0	0	0	0	2	4	2	0	0	2	6	0	0	0	0	12	0	0		0	0	0	0	4	0	0	0	4	10	0	0	4	0	0	0	4	0	0	0	6	0	0	2
DNA topoisomerase 1 (P11387)	0	0	0	0	0	0	0	0	0	0	0	0	0	0	0	0	0	0	0	0	0	0	0	0	0		3	0	0	0	0	0	0	0	0	0	0	0	0	0	3	0	0	0	0	0	0	0	0
DNA topoisomerase 2-alpha (P11388)	0	0	0	0	0	0	0	0	0	0	0	0	0	0	0	0	0	0	0	0	0	0	0	0	0	3		0	0	0	0	0	0	0	0	0	0	0	0	0	39	0	0	0	0	0	0	0	0
Vitamin D3 receptor (P11473)	0	0	0	0	0	0	0	0	0	0	0	0	0	0	0	0	0	0	0	0	0	0	0	0	0	0	0		0	0	0	0	0	0	0	0	0	0	0	0	0	0	0	0	0	0	0	0	0
Aromatase (P11511)	0	0	0	0	0	0	0	0	0	0	0	0	0	0	0	0	0	0	0	0	0	0	0	0	0	0	0	0		0	0	0	0	0	0	0	0	0	0	0	0	0	0	0	0	0	0	0	0
Proto-oncogene tyrosine-protein kinase Src (P12931)	0	0	0	15	0	0	0	0	0	0	0	4	2	0	0	2	2	0	0	0	0	8	0	0	4	0	0	0	0		0	0	0	0	2	0	0	2	0	0	0	2	0	0	0	8	0	0	2
Tissue factor (P13726)	0	0	0	0	0	0	0	0	0	0	0	0	0	0	0	0	0	0	0	0	0	0	0	0	0	0	0	0	0	0		0	0	0	0	0	0	0	0	0	0	0	0	0	0	0	0	0	0
Estradiol 17-beta-dehydrogenase 1 (P14061)	0	0	0	0	0	0	0	0	0	0	0	0	0	0	0	0	0	0	0	0	0	0	0	0	0	0	0	0	0	0	0		0	0	0	0	0	0	0	0	0	0	0	0	0	0	0	0	0
82 kDa matrix metalloproteinase-9 (P14780)	0	0	0	0	0	0	0	0	21	0	0	0	0	0	0	0	0	0	98	50	0	0	53	0	0	0	0	0	0	0	0	0		0	0	0	0	0	0	0	0	0	0	0	0	0	0	0	0
Serine/threonine-protein kinase B-raf (P15056)	0	0	0	3	0	0	0	0	0	0	1	0	0	0	0	0	4	0	0	0	0	16	0	0	4	0	0	0	0	0	0	0	0		2	0	0	0	0	0	0	2	0	0	0	8	0	0	0
Platelet-derived growth factor receptor alpha (P16234)	0	0	0	6	0	0	0	0	0	0	2	2	0	0	0	0	4	0	0	0	0	10	0	0	10	0	0	0	0	2	0	0	0	2		0	0	4	0	0	0	2	0	0	0	4	0	0	0
Protein kinase C alpha type (P17252)	0	0	0	0	0	0	0	0	0	0	0	0	0	0	0	0	0	0	0	0	0	0	43	0	0	0	0	0	0	0	0	0	0	0	0		0	0	0	0	0	0	0	0	0	0	0	0	0
3-oxo-5-alpha-steroid 4-dehydrogenase 1 (P18405)	0	0	0	0	0	0	0	1	0	0	0	0	0	1	0	0	0	0	0	0	0	0	0	1	0	0	0	0	0	0	0	0	0	0	0	0		0	0	0	0	0	2	0	0	0	0	0	0
Fibroblast growth factor receptor 3 (P22607)	0	0	0	2	0	0	0	0	0	0	0	2	0	0	0	0	2	0	0	0	0	2	0	0	4	0	0	0	0	2	0	0	0	0	4	0	0		0	0	0	0	0	0	0	2	0	0	0
Carbonic anhydrase 4 (P22748)	0	268	0	0	0	1020	1088	0	0	0	0	0	0	0	0	0	0	0	0	0	0	0	0	0	0	0	0	0	0	0	0	0	0	0	0	0	0	0		68	0	0	0	0	0	0	0	0	0
Carbonic anhydrase 6 (P23280)	0	67	0	0	0	69	69	0	0	0	0	0	0	0	0	0	0	0	0	0	0	0	0	0	0	0	0	0	0	0	0	0	0	0	0	0	0	0	68		0	0	0	0	0	0	0	0	0
DNA-(apurinic or apyrimidinic site) lyase, mitochondrial (P27695)	0	0	0	0	0	0	0	0	0	0	0	0	0	0	0	0	0	0	0	0	0	0	0	0	0	3	39	0	0	0	0	0	0	0	0	0	0	0	0	0		0	0	0	0	0	0	0	0
Ephrin type-A receptor 2 (P29317)	0	0	0	4	0	0	0	0	0	0	1	2	2	0	0	2	2	0	0	0	0	4	0	0	4	0	0	0	0	2	0	0	0	2	2	0	0	0	0	0	0		0	0	0	0	0	0	2
3-oxo-5-alpha-steroid 4-dehydrogenase 2 (P31213)	0	0	0	0	0	0	0	0	0	0	0	0	0	0	0	0	0	0	0	0	0	0	0	0	0	0	0	0	0	0	0	0	0	0	0	0	2	0	0	0	0	0		0	0	0	0	0	0
RAC-alpha serine/threonine-protein kinase (P31749)	0	0	0	2	0	0	0	0	0	0	0	0	0	0	0	0	0	0	0	0	0	0	0	0	0	0	0	0	0	0	0	0	0	0	0	0	0	0	0	0	0	0	0		0	0	2	0	2
Prostaglandin G/H synthase 2 (P35354)	0	0	0	0	0	0	0	0	0	0	0	0	0	0	0	0	0	0	0	0	0	0	270	0	0	0	0	0	0	0	0	0	0	0	0	0	0	0	0	0	0	0	0	0		0	0	216	0
Receptor-type tyrosine-protein kinase FLT3 (P36888)	0	0	0	3	0	0	0	0	0	0	0	2	0	0	0	0	4	0	0	0	0	16	0	0	6	0	0	0	0	8	0	0	0	8	4	0	0	2	0	0	0	0	0	0	0		0	0	0
Serine/threonine-protein kinase receptor R3 (P37023)	0	0	0	2	0	0	0	0	0	0	0	0	0	0	0	0	0	0	0	0	0	0	0	0	0	0	0	0	0	0	0	0	0	0	0	0	0	0	0	0	0	0	0	2	0	0		0	2
Peroxisome proliferator-activated receptor gamma (P37231)	0	0	0	0	0	0	0	0	0	0	0	0	0	0	0	0	0	0	0	0	0	0	120	0	0	0	0	0	0	0	0	0	0	0	0	0	0	0	0	0	0	0	0	0	216	0	0		0
Abelson tyrosine-protein kinase 2 (P42684)	0	0	0	4	0	0	0	0	0	0	0	2	2	0	0	2	0	0	0	0	0	2	0	0	2	0	0	0	0	2	0	0	0	0	0	0	0	0	0	0	0	2	0	2	0	0	2	0
Collagenase 3 (P45452)	0	0	0	0	0	0	0	0	12	0	0	0	0	0	0	0	0	0	44	44	0	0	0	0	0	0	0	0	0	0	0	0	44	0	0	0	0	0	0	0	0	0	0	0	0	0	0	0	0
Dual specificity mitogen-activated protein kinase kinase 1 (Q02750)	0	0	0	3	0	0	0	0	0	0	0	0	0	0	0	0	0	0	0	0	0	0	0	0	0	0	0	0	0	2	0	0	0	0	0	0	0	0	0	0	0	0	0	0	0	0	0	0	0
Glutamate carboxypeptidase 2 (Q04609)	0	0	0	0	0	0	0	0	0	0	0	0	0	0	0	0	0	0	0	0	0	0	0	0	0	0	0	0	0	0	0	0	0	0	0	0	0	0	0	0	0	0	0	0	0	0	0	0	0
Protein kinase C delta type catalytic subunit (Q05655)	0	0	0	0	0	0	0	0	0	0	0	0	0	0	0	0	0	0	0	0	0	0	0	0	0	0	0	0	0	0	0	0	0	0	0	1	0	0	0	0	0	0	0	0	0	0	0	0	0
Protein-tyrosine kinase 6 (Q13882)	0	0	0	0	2	0	0	0	0	0	0	0	0	0	0	0	0	0	0	0	0	0	0	0	0	0	0	0	0	0	0	0	0	0	0	0	0	0	0	0	0	0	0	0	0	0	0	0	0
Carbonic anhydrase 9 (Q16790)	0	268	0	0	0	276	276	0	0	0	0	0	0	0	0	0	0	0	0	0	0	0	0	0	0	0	0	0	0	0	0	0	0	0	0	0	0	0	272	69	0	0	0	0	0	0	0	0	0
Estrogen receptor beta (Q92731)	0	0	0	0	0	0	0	160	0	0	0	0	0	0	0	0	0	0	0	0	0	0	0	0	0	0	0	0	0	0	0	0	0	0	0	0	0	0	0	0	0	0	0	0	0	0	0	0	0
Smoothened homolog (Q99835)	0	0	0	0	0	0	0	0	0	0	0	0	0	0	0	0	0	0	0	0	0	0	0	0	0	0	0	0	0	0	0	0	0	0	0	0	0	0	0	0	0	0	0	0	0	0	0	0	0
Cystine/glutamate transporter (Q9UPY5)	0	0	0	0	0	0	0	0	0	0	0	0	0	0	0	0	0	0	0	0	0	0	1	0	0	0	0	0	0	0	0	0	0	0	0	0	0	0	0	0	0	0	0	0	1	0	0	1	0
[truncated: 9 more columns]

## Sheet: Cardiovascular
Shared drug-food interactions	Tyrosine-protein kinase JAK2 (O60674)	Tyrosine-protein kinase ABL1 (P00519)	Carbonic anhydrase 1 (P00915)	Estrogen receptor (P03372)	27 kDa interstitial collagenase (P03956)	Macrophage colony-stimulating factor 1 receptor (P07333)	Beta-2 adrenergic receptor (P07550)	Heat shock protein HSP 90-alpha (P07900)	Stromelysin-1 (P08254)	5-hydroxytryptamine receptor 1A (P08908)	Platelet-derived growth factor receptor beta (P09619)	Fibroblast growth factor receptor 1 (P11362)	Tissue factor (P13726)	82 kDa matrix metalloproteinase-9 (P14780)	Fibroblast growth factor receptor 3 (P22607)	Liver carboxylesterase 1 (P23141)	5-hydroxytryptamine receptor 1B (P28222)	5-hydroxytryptamine receptor 2A (P28223)	Adenosine receptor A2a (P29274)	Caspase-1 subunit p10 (P29466)	RAC-alpha serine/threonine-protein kinase (P31749)	Adenosine receptor A3 (P33765)	Prostaglandin G/H synthase 2 (P35354)	Histamine H1 receptor (P35367)	Peroxisome proliferator-activated receptor gamma (P37231)	Delta-type opioid receptor (P41143)	Kappa-type opioid receptor (P41145)	Abelson tyrosine-protein kinase 2 (P42684)	Collagenase 3 (P45452)	Glycogen synthase kinase-3 beta (P49841)	Spinorphin (P68871)	Glutamate carboxypeptidase 2 (Q04609)	Protein kinase C delta type catalytic subunit (Q05655)
Tyrosine-protein kinase JAK2 (O60674)		0	0	0	0	0	0	0	0	0	0	0	0	0	0	0	0	0	0	0	0	0	0	0	0	0	0	0	0	0	0	0	0
Tyrosine-protein kinase ABL1 (P00519)	0		0	0	0	2	0	0	0	0	9	2	0	0	2	0	0	0	0	0	2	0	0	0	0	0	0	4	0	0	0	0	0
Carbonic anhydrase 1 (P00915)	0	0		0	0	0	0	0	0	0	0	0	0	0	0	0	0	0	0	0	0	0	0	0	0	0	0	0	0	0	0	0	0
Estrogen receptor (P03372)	0	0	0		0	0	0	0	0	0	0	0	0	0	0	0	0	0	0	0	0	0	0	0	0	33	36	0	0	0	0	0	0
27 kDa interstitial collagenase (P03956)	0	0	0	0		0	0	0	17	0	0	0	0	21	0	0	0	0	0	0	0	0	0	0	0	0	0	0	12	0	0	0	0
Macrophage colony-stimulating factor 1 receptor (P07333)	0	2	0	0	0		0	0	0	0	4	0	0	0	0	0	0	0	0	0	0	0	0	0	0	0	0	0	0	0	0	0	0
Beta-2 adrenergic receptor (P07550)	0	0	0	0	0	0		0	0	6	0	0	0	0	0	0	0	0	0	0	0	0	0	0	0	0	0	0	0	0	0	0	0
Heat shock protein HSP 90-alpha (P07900)	0	0	0	0	0	0	0		0	0	0	0	0	0	0	0	0	0	0	0	0	0	0	0	0	0	0	0	0	0	0	0	0
Stromelysin-1 (P08254)	0	0	0	0	17	0	0	0		0	0	0	0	50	0	0	0	0	0	0	0	0	0	0	0	0	0	0	44	0	0	0	0
5-hydroxytryptamine receptor 1A (P08908)	0	0	0	0	0	0	6	0	0		0	0	0	0	0	0	88	155	0	0	0	0	0	0	0	4	4	0	0	0	0	0	0
Platelet-derived growth factor receptor beta (P09619)	0	9	0	0	0	4	0	0	0	0		2	0	0	2	0	0	0	0	0	0	0	0	0	0	0	0	2	0	0	0	0	0
Fibroblast growth factor receptor 1 (P11362)	0	2	0	0	0	0	0	0	0	0	2		0	0	2	0	0	0	0	0	0	0	0	0	0	0	0	0	0	0	0	0	0
Tissue factor (P13726)	0	0	0	0	0	0	0	0	0	0	0	0		0	0	0	0	0	0	0	0	0	0	0	0	0	0	0	0	0	0	0	0
82 kDa matrix metalloproteinase-9 (P14780)	0	0	0	0	21	0	0	0	50	0	0	0	0		0	0	0	0	0	13	0	0	0	0	0	0	0	0	44	0	0	0	0
Fibroblast growth factor receptor 3 (P22607)	0	2	0	0	0	0	0	0	0	0	2	2	0	0		0	0	0	0	0	0	0	0	0	0	0	0	0	0	0	0	0	0
Liver carboxylesterase 1 (P23141)	0	0	0	0	0	0	0	0	0	0	0	0	0	0	0		0	0	0	0	0	0	0	0	0	0	0	0	0	0	0	0	0
5-hydroxytryptamine receptor 1B (P28222)	0	0	0	0	0	0	0	0	0	88	0	0	0	0	0	0		60	0	0	0	0	0	0	0	0	0	0	0	0	0	0	0
5-hydroxytryptamine receptor 2A (P28223)	0	0	0	0	0	0	0	0	0	155	0	0	0	0	0	0	60		0	0	0	0	0	0	0	3	6	0	0	0	0	0	0
Adenosine receptor A2a (P29274)	0	0	0	0	0	0	0	0	0	0	0	0	0	0	0	0	0	0		0	0	3	0	0	0	0	0	0	0	0	0	0	0
Caspase-1 subunit p10 (P29466)	0	0	0	0	0	0	0	0	0	0	0	0	0	13	0	0	0	0	0		0	0	0	0	0	0	0	0	0	0	0	0	0
RAC-alpha serine/threonine-protein kinase (P31749)	0	2	0	0	0	0	0	0	0	0	0	0	0	0	0	0	0	0	0	0		0	0	0	0	0	0	2	0	0	0	0	0
Adenosine receptor A3 (P33765)	0	0	0	0	0	0	0	0	0	0	0	0	0	0	0	0	0	0	3	0	0		0	0	0	0	0	0	0	0	0	0	0
Prostaglandin G/H synthase 2 (P35354)	0	0	0	0	0	0	0	0	0	0	0	0	0	0	0	0	0	0	0	0	0	0		0	216	0	0	0	0	0	0	0	0
Histamine H1 receptor (P35367)	0	0	0	0	0	0	0	0	0	0	0	0	0	0	0	0	0	0	0	0	0	0	0		0	0	0	0	0	0	0	0	0
Peroxisome proliferator-activated receptor gamma (P37231)	0	0	0	0	0	0	0	0	0	0	0	0	0	0	0	0	0	0	0	0	0	0	216	0		0	0	0	0	0	0	0	0
Delta-type opioid receptor (P41143)	0	0	0	33	0	0	0	0	0	4	0	0	0	0	0	0	0	3	0	0	0	0	0	0	0		800	0	0	0	0	0	0
Kappa-type opioid receptor (P41145)	0	0	0	36	0	0	0	0	0	4	0	0	0	0	0	0	0	6	0	0	0	0	0	0	0	800		0	0	0	0	0	0
Abelson tyrosine-protein kinase 2 (P42684)	0	4	0	0	0	0	0	0	0	0	2	0	0	0	0	0	0	0	0	0	2	0	0	0	0	0	0		0	0	0	0	0
Collagenase 3 (P45452)	0	0	0	0	12	0	0	0	44	0	0	0	0	44	0	0	0	0	0	0	0	0	0	0	0	0	0	0		0	0	0	0
Glycogen synthase kinase-3 beta (P49841)	0	0	0	0	0	0	0	0	0	0	0	0	0	0	0	0	0	0	0	0	0	0	0	0	0	0	0	0	0		0	0	0
Spinorphin (P68871)	0	0	0	0	0	0	0	0	0	0	0	0	0	0	0	0	0	0	0	0	0	0	0	0	0	0	0	0	0	0		0	0
Glutamate carboxypeptidase 2 (Q04609)	0	0	0	0	0	0	0	0	0	0	0	0	0	0	0	0	0	0	0	0	0	0	0	0	0	0	0	0	0	0	0		0
Protein kinase C delta type catalytic subunit (Q05655)	0	0	0	0	0	0	0	0	0	0	0	0	0	0	0	0	0	0	0	0	0	0	0	0	0	0	0	0	0	0	0	0

## Sheet: Endocrine
Shared drug-food interactions	3-phosphoinositide-dependent protein kinase 1 (O15530)	Glucocorticoid receptor (P04150)	Insulin receptor subunit beta (P06213)	70 kDa lysosomal alpha-glucosidase (P10253)	Thyroid hormone receptor beta (P10828)	Aromatase (P11511)	Sodium/glucose cotransporter 1 (P13866)	Steroid Delta-isomerase (P14060)	Thyrotropin receptor (P16473)	Adenosine receptor A1 (P30542)	RAC-alpha serine/threonine-protein kinase (P31749)	Peroxisome proliferator-activated receptor gamma (P37231)	Glucagon-like peptide 1 receptor (P43220)	Glycogen synthase kinase-3 beta (P49841)	5-hydroxytryptamine receptor 6 (P50406)	Peroxisome proliferator-activated receptor alpha (Q07869)
3-phosphoinositide-dependent protein kinase 1 (O15530)		0	0	0	0	0	0	0	0	0	0	0	0	0	0	0
Glucocorticoid receptor (P04150)	0		0	0	0	0	0	0	0	0	0	0	0	0	0	0
Insulin receptor subunit beta (P06213)	0	0		0	0	0	0	0	0	0	0	0	0	0	0	0
70 kDa lysosomal alpha-glucosidase (P10253)	0	0	0		0	0	0	0	0	0	0	0	0	0	0	0
Thyroid hormone receptor beta (P10828)	0	0	0	0		0	0	0	0	0	0	0	0	0	0	0
Aromatase (P11511)	0	0	0	0	0		0	0	0	0	0	0	0	0	0	0
Sodium/glucose cotransporter 1 (P13866)	0	0	0	0	0	0		0	0	0	0	0	0	0	0	0
Steroid Delta-isomerase (P14060)	0	0	0	0	0	0	0		0	0	0	0	0	0	0	0
Thyrotropin receptor (P16473)	0	0	0	0	0	0	0	0		0	0	0	0	0	0	0
Adenosine receptor A1 (P30542)	0	0	0	0	0	0	0	0	0		0	0	0	0	0	0
RAC-alpha serine/threonine-protein kinase (P31749)	0	0	0	0	0	0	0	0	0	0		0	0	0	0	0
Peroxisome proliferator-activated receptor gamma (P37231)	0	0	0	0	0	0	0	0	0	0	0		0	0	0	22
Glucagon-like peptide 1 receptor (P43220)	0	0	0	0	0	0	0	0	0	0	0	0		0	0	0
Glycogen synthase kinase-3 beta (P49841)	0	0	0	0	0	0	0	0	0	0	0	0	0		0	0
5-hydroxytryptamine receptor 6 (P50406)	0	0	0	0	0	0	0	0	0	0	0	0	0	0		0
Peroxisome proliferator-activated receptor alpha (Q07869)	0	0	0	0	0	0	0	0	0	0	0	22	0	0	0

## Sheet: Gastrointestinal
Shared drug-food interactions	3-phosphoinositide-dependent protein kinase 1 (O15530)	Glucocorticoid receptor (P04150)	Insulin receptor subunit beta (P06213)	Neutrophil elastase (P08246)	Arachidonate 5-lipoxygenase (P09917)	70 kDa lysosomal alpha-glucosidase (P10253)	Sodium/glucose cotransporter 1 (P13866)	Cannabinoid receptor 1 (P21554)	Adenosine receptor A1 (P30542)	RAC-alpha serine/threonine-protein kinase (P31749)	Adenosine receptor A3 (P33765)	Prostaglandin G/H synthase 2 (P35354)	Mu-type opioid receptor (P35372)	Peroxisome proliferator-activated receptor gamma (P37231)	Kappa-type opioid receptor (P41145)	Metabotropic glutamate receptor 5 (P41594)	Glucagon-like peptide 1 receptor (P43220)	Glycogen synthase kinase-3 beta (P49841)	5-hydroxytryptamine receptor 6 (P50406)	Peroxisome proliferator-activated receptor alpha (Q07869)	Bile acid receptor (Q96RI1)
3-phosphoinositide-dependent protein kinase 1 (O15530)		0	0	0	0	0	0	0	0	0	0	0	0	0	0	0	0	0	0	0	0
Glucocorticoid receptor (P04150)	0		0	0	0	0	0	0	0	0	0	0	0	0	0	0	0	0	0	0	0
Insulin receptor subunit beta (P06213)	0	0		0	0	0	0	0	0	0	0	0	0	0	0	0	0	0	0	0	0
Neutrophil elastase (P08246)	0	0	0		0	0	0	0	0	0	0	0	0	0	0	0	0	0	0	0	0
Arachidonate 5-lipoxygenase (P09917)	0	0	0	0		0	0	0	0	0	0	270	0	120	0	0	0	0	0	0	0
70 kDa lysosomal alpha-glucosidase (P10253)	0	0	0	0	0		0	0	0	0	0	0	0	0	0	0	0	0	0	0	0
Sodium/glucose cotransporter 1 (P13866)	0	0	0	0	0	0		0	0	0	0	0	0	0	0	0	0	0	0	0	0
Cannabinoid receptor 1 (P21554)	0	0	0	0	0	0	0		0	0	0	0	0	0	0	0	0	0	0	0	0
Adenosine receptor A1 (P30542)	0	0	0	0	0	0	0	0		0	12	0	0	0	0	0	0	0	0	0	0
RAC-alpha serine/threonine-protein kinase (P31749)	0	0	0	0	0	0	0	0	0		0	0	0	0	0	0	0	0	0	0	0
Adenosine receptor A3 (P33765)	0	0	0	0	0	0	0	0	12	0		0	0	0	0	0	0	0	0	0	0
Prostaglandin G/H synthase 2 (P35354)	0	0	0	0	270	0	0	0	0	0	0		0	216	0	0	0	0	0	0	0
Mu-type opioid receptor (P35372)	0	0	0	0	0	0	0	0	0	0	0	0		0	880	0	0	0	0	0	0
Peroxisome proliferator-activated receptor gamma (P37231)	0	0	0	0	120	0	0	0	0	0	0	216	0		0	0	0	0	0	22	0
Kappa-type opioid receptor (P41145)	0	0	0	0	0	0	0	0	0	0	0	0	880	0		0	0	0	0	0	0
Metabotropic glutamate receptor 5 (P41594)	0	0	0	0	0	0	0	0	0	0	0	0	0	0	0		0	0	0	0	0
Glucagon-like peptide 1 receptor (P43220)	0	0	0	0	0	0	0	0	0	0	0	0	0	0	0	0		0	0	0	0
Glycogen synthase kinase-3 beta (P49841)	0	0	0	0	0	0	0	0	0	0	0	0	0	0	0	0	0		0	0	0
5-hydroxytryptamine receptor 6 (P50406)	0	0	0	0	0	0	0	0	0	0	0	0	0	0	0	0	0	0		0	0
Peroxisome proliferator-activated receptor alpha (Q07869)	0	0	0	0	0	0	0	0	0	0	0	0	0	22	0	0	0	0	0		0
Bile acid receptor (Q96RI1)	0	0	0	0	0	0	0	0	0	0	0	0	0	0	0	0	0	0	0	0

## Sheet: Immunological
Shared drug-food interactions	82 kDa matrix metalloproteinase-9 (P14780)	Thyrotropin receptor (P16473)	Receptor-type tyrosine-protein kinase FLT3 (P36888)	Peroxisome proliferator-activated receptor gamma (P37231)	Kappa-type opioid receptor (P41145)
82 kDa matrix metalloproteinase-9 (P14780)		0	0	0	0
Thyrotropin receptor (P16473)	0		0	0	0
Receptor-type tyrosine-protein kinase FLT3 (P36888)	0	0		0	0
Peroxisome proliferator-activated receptor gamma (P37231)	0	0	0		0
Kappa-type opioid receptor (P41145)	0	0	0	0

## Sheet: Infectious
Shared drug-food interactions	Carbonic anhydrase 12 (O43570)	Carbonic anhydrase 2 (P00918)	Muscarinic acetylcholine receptor M2 (P08172)	Arachidonate 5-lipoxygenase (P09917)	DNA topoisomerase 2-alpha (P11388)	Ribosyldihydronicotinamide dehydrogenase [quinone] (P16083)	Carbonic anhydrase 4 (P22748)	Adenosine receptor A1 (P30542)	Carbonic anhydrase 14 (Q9ULX7)
Carbonic anhydrase 12 (O43570)		268	0	0	0	0	268	0	67
Carbonic anhydrase 2 (P00918)	268		0	0	0	0	1088	0	136
Muscarinic acetylcholine receptor M2 (P08172)	0	0		0	0	0	0	0	0
Arachidonate 5-lipoxygenase (P09917)	0	0	0		0	0	0	0	0
DNA topoisomerase 2-alpha (P11388)	0	0	0	0		0	0	0	0
Ribosyldihydronicotinamide dehydrogenase [quinone] (P16083)	0	0	0	0	0		0	0	0
Carbonic anhydrase 4 (P22748)	268	1088	0	0	0	0		0	134
Adenosine receptor A1 (P30542)	0	0	0	0	0	0	0		0
Carbonic anhydrase 14 (Q9ULX7)	67	136	0	0	0	0	134	0

## Sheet: Integumentary
Shared drug-food interactions	Arachidonate 5-lipoxygenase (P09917)	Tyrosinase (P14679)	3-oxo-5-alpha-steroid 4-dehydrogenase 1 (P18405)	3-oxo-5-alpha-steroid 4-dehydrogenase 2 (P31213)	Histamine H1 receptor (P35367)	Peroxisome proliferator-activated receptor gamma (P37231)	Mitogen-activated protein kinase 11 (Q15759)
Arachidonate 5-lipoxygenase (P09917)		0	0	0	0	120	0
Tyrosinase (P14679)	0		0	1	0	0	0
3-oxo-5-alpha-steroid 4-dehydrogenase 1 (P18405)	0	0		2	0	0	0
3-oxo-5-alpha-steroid 4-dehydrogenase 2 (P31213)	0	1	2		0	0	0
Histamine H1 receptor (P35367)	0	0	0	0		0	0
Peroxisome proliferator-activated receptor gamma (P37231)	120	0	0	0	0		0
Mitogen-activated protein kinase 11 (Q15759)	0	0	0	0	0	0

## Sheet: Monogenic
Shared drug-food interactions	Neutrophil elastase (P08246)	Arachidonate 5-lipoxygenase (P09917)	Aromatase (P11511)
Neutrophil elastase (P08246)		0	0
Arachidonate 5-lipoxygenase (P09917)	0		0
Aromatase (P11511)	0	0

## Sheet: Musculoskeletal
Shared drug-food interactions	Metabotropic glutamate receptor 8 (O00222)	Estrogen receptor (P03372)	27 kDa interstitial collagenase (P03956)	Beta-2 adrenergic receptor (P07550)	PEX (P08253)	Stromelysin-1 (P08254)	Arachidonate 5-lipoxygenase (P09917)	Androgen receptor (P10275)	Proto-oncogene tyrosine-protein kinase Src (P12931)	D(2) dopamine receptor (P14416)	82 kDa matrix metalloproteinase-9 (P14780)	Fibroblast growth factor receptor 3 (P22607)	Neutrophil collagenase (P22894)	Prostaglandin G/H synthase 2 (P35354)	Histamine H1 receptor (P35367)	Collagenase 3 (P45452)	Glutamate carboxypeptidase 2 (Q04609)	Metabotropic glutamate receptor 2 (Q14416)	Metabotropic glutamate receptor 3 (Q14832)	Mitogen-activated protein kinase 11 (Q15759)	Transient receptor potential cation channel subfamily V member 1 (Q8NER1)
Metabotropic glutamate receptor 8 (O00222)		0	0	0	0	0	0	0	0	0	0	0	0	0	0	0	1	0	0	0	0
Estrogen receptor (P03372)	0		0	0	0	0	0	99	0	0	0	0	0	0	0	0	0	0	0	0	0
27 kDa interstitial collagenase (P03956)	0	0		0	14	17	0	0	0	0	21	0	20	0	0	12	0	0	0	0	0
Beta-2 adrenergic receptor (P07550)	0	0	0		0	0	0	0	0	1	0	0	0	0	0	0	0	0	0	0	0
PEX (P08253)	0	0	14	0		47	0	0	0	0	98	0	14	0	0	44	0	0	0	0	0
Stromelysin-1 (P08254)	0	0	17	0	47		0	0	0	0	50	0	16	0	0	44	0	0	0	0	0
Arachidonate 5-lipoxygenase (P09917)	0	0	0	0	0	0		0	0	0	53	0	0	270	0	0	0	0	0	0	0
Androgen receptor (P10275)	0	99	0	0	0	0	0		0	0	0	0	0	0	0	0	0	0	0	0	0
Proto-oncogene tyrosine-protein kinase Src (P12931)	0	0	0	0	0	0	0	0		0	0	2	0	0	0	0	0	0	0	0	0
D(2) dopamine receptor (P14416)	0	0	0	1	0	0	0	0	0		0	0	0	0	0	0	0	0	0	0	0
82 kDa matrix metalloproteinase-9 (P14780)	0	0	21	0	98	50	53	0	0	0		0	21	0	0	44	0	0	0	0	0
Fibroblast growth factor receptor 3 (P22607)	0	0	0	0	0	0	0	0	2	0	0		0	0	0	0	0	0	0	0	0
Neutrophil collagenase (P22894)	0	0	20	0	14	16	0	0	0	0	21	0		0	0	11	0	0	0	0	0
Prostaglandin G/H synthase 2 (P35354)	0	0	0	0	0	0	270	0	0	0	0	0	0		0	0	0	0	0	0	2
Histamine H1 receptor (P35367)	0	0	0	0	0	0	0	0	0	0	0	0	0	0		0	0	0	0	0	0
Collagenase 3 (P45452)	0	0	12	0	44	44	0	0	0	0	44	0	11	0	0		0	0	0	0	0
Glutamate carboxypeptidase 2 (Q04609)	1	0	0	0	0	0	0	0	0	0	0	0	0	0	0	0		0	0	0	0
Metabotropic glutamate receptor 2 (Q14416)	0	0	0	0	0	0	0	0	0	0	0	0	0	0	0	0	0		1	0	0
Metabotropic glutamate receptor 3 (Q14832)	0	0	0	0	0	0	0	0	0	0	0	0	0	0	0	0	0	1		0	0
Mitogen-activated protein kinase 11 (Q15759)	0	0	0	0	0	0	0	0	0	0	0	0	0	0	0	0	0	0	0		0
Transient receptor potential cation channel subfamily V member 1 (Q8NER1)	0	0	0	0	0	0	0	0	0	0	0	0	0	2	0	0	0	0	0	0

## Sheet: Neurological
Shared drug-food interactions	Metabotropic glutamate receptor 8 (O00222)	Pyridoxal kinase (O00764)	Carbonic anhydrase 1 (P00915)	Carbonic anhydrase 2 (P00918)	Estrogen receptor (P03372)	Glucocorticoid receptor (P04150)	High affinity nerve growth factor receptor (P04629)	Cholinesterase (P06276)	Beta-2 adrenergic receptor (P07550)	Muscarinic acetylcholine receptor M2 (P08172)	Muscarinic acetylcholine receptor M4 (P08173)	Mineralocorticoid receptor (P08235)	5-hydroxytryptamine receptor 1A (P08908)	Muscarinic acetylcholine receptor M5 (P08912)	Arachidonate 5-lipoxygenase (P09917)	Muscarinic acetylcholine receptor M1 (P11229)	Aromatase (P11511)	D(2) dopamine receptor (P14416)	82 kDa matrix metalloproteinase-9 (P14780)	Vascular endothelial growth factor receptor 1 (P17948)	Amine oxidase [flavin-containing] A (P21397)	Cannabinoid receptor 1 (P21554)	D(1A) dopamine receptor (P21728)	Acetylcholinesterase (P22303)	Carbonic anhydrase 4 (P22748)	Liver carboxylesterase 1 (P23141)	Amine oxidase [flavin-containing] B (P27338)	Mitogen-activated protein kinase 3 (P27361)	5-hydroxytryptamine receptor 1D (P28221)	5-hydroxytryptamine receptor 1B (P28222)	5-hydroxytryptamine receptor 2A (P28223)	5-hydroxytryptamine receptor 2C (P28335)	Mitogen-activated protein kinase 1 (P28482)	Adenosine receptor A2a (P29274)	Caspase-1 subunit p10 (P29466)	Sodium-dependent serotonin transporter (P31645)	RAC-alpha serine/threonine-protein kinase (P31749)	5-hydroxytryptamine receptor 7 (P34969)	Prostaglandin G/H synthase 2 (P35354)	Histamine H1 receptor (P35367)	Serine/threonine-protein kinase receptor R3 (P37023)	Peroxisome proliferator-activated receptor gamma (P37231)	Delta-type opioid receptor (P41143)	Kappa-type opioid receptor (P41145)	Metabotropic glutamate receptor 5 (P41594)	5-hydroxytryptamine receptor 2B (P41595)	Glutamate receptor 1 (P42261)	Glucagon-like peptide 1 receptor (P43220)	Glycogen synthase kinase-3 beta (P49841)
Metabotropic glutamate receptor 8 (O00222)		0	0	0	0	0	0	0	0	0	0	0	0	0	0	0	0	0	0	0	0	0	0	0	0	0	0	0	0	0	0	0	0	0	0	0	0	0	0	0	0	0	0	0	0	0	1	0	0
Pyridoxal kinase (O00764)	0		0	0	0	0	0	0	0	0	0	0	0	0	0	0	0	0	0	0	0	0	0	0	0	0	0	0	0	0	0	0	0	0	0	0	0	0	0	0	0	0	0	0	0	0	0	0	0
Carbonic anhydrase 1 (P00915)	0	0		1296	0	0	0	0	0	0	0	0	0	0	0	0	0	0	0	0	4	0	0	0	1020	0	5	0	0	0	0	0	0	0	0	0	0	0	0	0	0	0	0	0	0	0	0	0	0
Carbonic anhydrase 2 (P00918)	0	0	1296		0	0	0	0	0	0	0	0	0	0	0	0	0	0	0	0	4	0	0	0	1088	0	5	0	0	0	0	0	0	0	0	0	0	0	0	0	0	0	0	0	0	0	0	0	0
Estrogen receptor (P03372)	0	0	0	0		2	0	0	0	0	0	1	0	0	0	0	0	0	0	0	0	0	0	0	0	0	0	0	0	0	0	0	0	0	0	0	0	0	0	0	0	0	33	36	0	0	0	0	0
Glucocorticoid receptor (P04150)	0	0	0	0	2		0	0	0	0	0	2	0	0	0	0	0	0	0	0	0	0	0	0	0	0	0	0	0	0	0	0	0	0	0	0	0	0	0	0	0	0	0	0	0	0	0	0	0
High affinity nerve growth factor receptor (P04629)	0	0	0	0	0	0		0	0	1	1	0	1	1	0	1	0	0	0	1	0	0	0	0	0	0	0	0	0	0	1	0	0	0	0	0	0	0	0	0	0	0	1	1	0	0	0	0	0
Cholinesterase (P06276)	0	0	0	0	0	0	0		3	2	0	0	0	0	0	0	0	0	0	0	0	0	0	468	0	0	0	0	0	0	0	0	0	0	0	0	0	0	0	0	0	0	0	0	0	0	0	0	0
Beta-2 adrenergic receptor (P07550)	0	0	0	0	0	0	0	3		0	0	0	6	0	0	0	0	1	0	0	1	0	2	0	0	0	2	0	0	0	0	0	3	0	0	3	0	0	0	0	0	0	0	0	0	0	0	0	0
Muscarinic acetylcholine receptor M2 (P08172)	0	0	0	0	0	0	1	2	0		68	0	8	62	0	104	0	0	0	0	0	0	20	2	0	0	0	0	5	5	17	11	0	0	0	0	0	5	0	0	0	0	1	2	0	3	0	0	0
Muscarinic acetylcholine receptor M4 (P08173)	0	0	0	0	0	0	1	0	0	68		0	8	62	0	68	0	0	0	0	0	0	18	0	0	0	0	0	5	5	16	10	0	0	0	0	0	5	0	0	0	0	1	2	0	2	0	0	0
Mineralocorticoid receptor (P08235)	0	0	0	0	1	2	0	0	0	0	0		0	0	0	0	0	0	0	0	0	0	0	0	0	0	0	0	0	0	0	0	0	0	0	0	0	0	0	0	0	0	0	0	0	0	0	0	0
5-hydroxytryptamine receptor 1A (P08908)	0	0	0	0	0	0	1	0	6	8	8	0		8	0	9	0	54	0	0	0	0	132	0	0	0	0	0	76	88	155	100	0	0	0	6	0	48	0	0	0	0	4	4	0	44	0	0	0
Muscarinic acetylcholine receptor M5 (P08912)	0	0	0	0	0	0	1	0	0	62	62	0	8		0	62	0	0	0	0	0	0	18	0	0	0	0	0	5	5	16	10	0	0	0	0	0	5	0	0	0	0	1	2	0	2	0	0	0
Arachidonate 5-lipoxygenase (P09917)	0	0	0	0	0	0	0	0	0	0	0	0	0	0		0	0	0	53	0	0	0	0	0	0	0	0	0	0	0	0	0	0	0	15	0	0	0	270	0	0	120	0	0	0	0	0	0	0
Muscarinic acetylcholine receptor M1 (P11229)	0	0	0	0	0	0	1	0	0	104	68	0	9	62	0		0	0	0	0	2	0	26	3	0	0	0	0	5	5	20	12	0	0	0	0	0	5	0	0	0	0	2	3	0	4	0	0	0
Aromatase (P11511)	0	0	0	0	0	0	0	0	0	0	0	0	0	0	0	0		0	0	0	0	0	0	0	0	0	0	0	0	0	0	0	0	0	0	0	0	0	0	0	0	0	0	0	0	0	0	0	0
D(2) dopamine receptor (P14416)	0	0	0	0	0	0	0	0	1	0	0	0	54	0	0	0	0		0	0	0	0	168	4	0	0	0	0	0	0	43	24	0	0	0	4	0	0	0	0	0	0	0	0	0	0	0	0	0
82 kDa matrix metalloproteinase-9 (P14780)	0	0	0	0	0	0	0	0	0	0	0	0	0	0	53	0	0	0		0	0	0	0	0	0	0	0	0	0	0	0	0	0	0	13	0	0	0	0	0	0	0	0	0	0	0	0	0	0
Vascular endothelial growth factor receptor 1 (P17948)	0	0	0	0	0	0	1	0	0	0	0	0	0	0	0	0	0	0	0		0	0	0	0	0	0	0	0	0	0	0	0	0	0	0	0	0	0	0	0	0	0	0	0	0	0	0	0	0
Amine oxidase [flavin-containing] A (P21397)	0	0	4	4	0	0	0	0	1	0	0	0	0	0	0	2	0	0	0	0		0	4	6	3	0	18	0	0	0	1	1	0	0	0	0	0	0	0	0	0	0	0	0	0	1	0	0	0
Cannabinoid receptor 1 (P21554)	0	0	0	0	0	0	0	0	0	0	0	0	0	0	0	0	0	0	0	0	0		0	0	0	0	0	0	0	0	0	0	0	0	0	0	0	0	0	0	0	0	0	0	0	0	0	0	0
D(1A) dopamine receptor (P21728)	0	0	0	0	0	0	0	0	2	20	18	0	132	18	0	26	0	168	0	0	4	0		45	0	0	0	0	56	52	165	105	0	0	0	6	0	36	0	30	0	0	0	0	0	44	0	0	0
Acetylcholinesterase (P22303)	0	0	0	0	0	0	0	468	0	2	0	0	0	0	0	3	0	4	0	0	6	0	45		0	0	0	0	0	0	10	5	0	0	0	2	0	0	0	0	0	0	0	0	0	4	0	0	0
Carbonic anhydrase 4 (P22748)	0	0	1020	1088	0	0	0	0	0	0	0	0	0	0	0	0	0	0	0	0	3	0	0	0		0	5	0	0	0	0	0	0	0	0	0	0	0	0	0	0	0	0	0	0	0	0	0	0
Liver carboxylesterase 1 (P23141)	0	0	0	0	0	0	0	0	0	0	0	0	0	0	0	0	0	0	0	0	0	0	0	0	0		0	0	0	0	0	0	0	0	0	0	0	0	0	0	0	0	0	0	0	0	0	0	0
Amine oxidase [flavin-containing] B (P27338)	0	0	5	5	0	0	0	0	2	0	0	0	0	0	0	0	0	0	0	0	18	0	0	0	5	0		0	0	0	0	0	0	0	0	0	0	0	0	0	0	0	0	0	0	0	0	0	0
Mitogen-activated protein kinase 3 (P27361)	0	0	0	0	0	0	0	0	0	0	0	0	0	0	0	0	0	0	0	0	0	0	0	0	0	0	0		0	0	0	0	2	0	0	0	1	0	0	0	0	0	0	0	0	0	0	0	0
5-hydroxytryptamine receptor 1D (P28221)	0	0	0	0	0	0	0	0	0	5	5	0	76	5	0	5	0	0	0	0	0	0	56	0	0	0	0	0		88	64	60	0	0	0	0	0	32	0	0	0	0	0	0	0	36	0	0	0
5-hydroxytryptamine receptor 1B (P28222)	0	0	0	0	0	0	0	0	0	5	5	0	88	5	0	5	0	0	0	0	0	0	52	0	0	0	0	0	88		60	56	0	0	0	0	0	36	0	0	0	0	0	0	0	40	0	0	0
5-hydroxytryptamine receptor 2A (P28223)	0	0	0	0	0	0	1	0	0	17	16	0	155	16	0	20	0	43	0	0	1	0	165	10	0	0	0	0	64	60		155	0	0	0	0	0	52	0	0	0	0	3	6	0	52	0	0	0
5-hydroxytryptamine receptor 2C (P28335)	0	0	0	0	0	0	0	0	0	11	10	0	100	10	0	12	0	24	0	0	1	0	105	5	0	0	0	0	60	56	155		0	0	0	0	0	36	0	0	0	0	3	6	0	52	0	0	0
Mitogen-activated protein kinase 1 (P28482)	0	0	0	0	0	0	0	0	3	0	0	0	0	0	0	0	0	0	0	0	0	0	0	0	0	0	0	2	0	0	0	0		0	0	0	2	0	0	0	0	0	0	0	0	0	0	0	0
Adenosine receptor A2a (P29274)	0	0	0	0	0	0	0	0	0	0	0	0	0	0	0	0	0	0	0	0	0	0	0	0	0	0	0	0	0	0	0	0	0		0	0	0	0	0	0	0	0	0	0	0	0	0	0	0
Caspase-1 subunit p10 (P29466)	0	0	0	0	0	0	0	0	0	0	0	0	0	0	15	0	0	0	13	0	0	0	0	0	0	0	0	0	0	0	0	0	0	0		0	0	0	0	0	0	0	0	0	0	0	0	0	0
Sodium-dependent serotonin transporter (P31645)	0	0	0	0	0	0	0	0	3	0	0	0	6	0	0	0	0	4	0	0	0	0	6	2	0	0	0	0	0	0	0	0	0	0	0		0	0	0	0	0	0	3	3	0	0	0	0	0
RAC-alpha serine/threonine-protein kinase (P31749)	0	0	0	0	0	0	0	0	0	0	0	0	0	0	0	0	0	0	0	0	0	0	0	0	0	0	0	1	0	0	0	0	2	0	0	0		0	0	0	2	0	0	0	0	0	0	0	0
5-hydroxytryptamine receptor 7 (P34969)	0	0	0	0	0	0	0	0	0	5	5	0	48	5	0	5	0	0	0	0	0	0	36	0	0	0	0	0	32	36	52	36	0	0	0	0	0		0	0	0	0	0	0	0	20	0	0	0
Prostaglandin G/H synthase 2 (P35354)	0	0	0	0	0	0	0	0	0	0	0	0	0	0	270	0	0	0	0	0	0	0	0	0	0	0	0	0	0	0	0	0	0	0	0	0	0	0		0	0	216	0	0	0	0	0	0	0
Histamine H1 receptor (P35367)	0	0	0	0	0	0	0	0	0	0	0	0	0	0	0	0	0	0	0	0	0	0	30	0	0	0	0	0	0	0	0	0	0	0	0	0	0	0	0		0	0	0	0	0	0	0	0	0
Serine/threonine-protein kinase receptor R3 (P37023)	0	0	0	0	0	0	0	0	0	0	0	0	0	0	0	0	0	0	0	0	0	0	0	0	0	0	0	0	0	0	0	0	0	0	0	0	2	0	0	0		0	0	0	0	0	0	0	0
Peroxisome proliferator-activated receptor gamma (P37231)	0	0	0	0	0	0	0	0	0	0	0	0	0	0	120	0	0	0	0	0	0	0	0	0	0	0	0	0	0	0	0	0	0	0	0	0	0	0	216	0	0		0	0	0	0	0	0	0
Delta-type opioid receptor (P41143)	0	0	0	0	33	0	1	0	0	1	1	0	4	1	0	2	0	0	0	0	0	0	0	0	0	0	0	0	0	0	3	3	0	0	0	3	0	0	0	0	0	0		800	0	0	0	0	0
Kappa-type opioid receptor (P41145)	0	0	0	0	36	0	1	0	0	2	2	0	4	2	0	3	0	0	0	0	0	0	0	0	0	0	0	0	0	0	6	6	0	0	0	3	0	0	0	0	0	0	800		0	0	0	0	0
Metabotropic glutamate receptor 5 (P41594)	0	0	0	0	0	0	0	0	0	0	0	0	0	0	0	0	0	0	0	0	0	0	0	0	0	0	0	0	0	0	0	0	0	0	0	0	0	0	0	0	0	0	0	0		0	0	0	0
5-hydroxytryptamine receptor 2B (P41595)	0	0	0	0	0	0	0	0	0	3	2	0	44	2	0	4	0	0	0	0	1	0	44	4	0	0	0	0	36	40	52	52	0	0	0	0	0	20	0	0	0	0	0	0	0		0	0	0
Glutamate receptor 1 (P42261)	1	0	0	0	0	0	0	0	0	0	0	0	0	0	0	0	0	0	0	0	0	0	0	0	0	0	0	0	0	0	0	0	0	0	0	0	0	0	0	0	0	0	0	0	0	0		0	0
Glucagon-like peptide 1 receptor (P43220)	0	0	0	0	0	0	0	0	0	0	0	0	0	0	0	0	0	0	0	0	0	0	0	0	0	0	0	0	0	0	0	0	0	0	0	0	0	0	0	0	0	0	0	0	0	0	0		0
Glycogen synthase kinase-3 beta (P49841)	0	0	0	0	0	0	0	0	0	0	0	0	0	0	0	0	0	0	0	0	0	0	0	0	0	0	0	0	0	0	0	0	0	0	0	0	0	0	0	0	0	0	0	0	0	0	0	0
5-hydroxytryptamine receptor 6 (P50406)	0	0	0	0	0	0	0	0	0	5	5	0	28	5	0	5	0	0	0	0	0	0	35	0	0	0	0	0	20	24	32	28	0	0	0	0	0	28	0	7	0	0	0	0	0	4	0	0	0
Glutamate carboxypeptidase 2 (Q04609)	1	0	0	0	0	0	0	0	0	0	0	0	0	0	0	0	0	0	0	0	0	0	0	0	0	0	0	0	0	0	0	0	0	0	0	0	0	0	0	0	0	0	0	0	0	0	1	0	0
Metabotropic glutamate receptor 2 (Q14416)	0	0	0	0	0	0	0	0	0	0	0	0	0	0	0	0	0	0	0	0	0	0	0	0	0	0	0	0	0	0	0	0	0	0	0	0	0	0	0	0	0	0	0	0	1	0	0	0	0
Metabotropic glutamate receptor 3 (Q14832)	0	0	0	0	0	0	0	0	0	0	0	0	0	0	0	0	0	0	0	0	0	0	0	0	0	0	0	0	0	0	0	0	0	0	0	0	0	0	0	0	0	0	0	0	1	0	0	0	0
Metabotropic glutamate receptor 4 (Q14833)	1	0	0	0	0	0	0	0	0	0	0	0	0	0	0	0	0	0	0	0	0	0	0	0	0	0	0	0	0	0	0	0	0	0	0	0	0	0	0	0	0	0	0	0	0	0	1	0	0
Transient receptor potential cation channel subfamily V member 1 (Q8NER1)	0	0	0	0	0	0	0	0	0	0	0	0	0	0	0	0	0	0	0	0	0	0	0	0	0	0	0	0	0	0	0	0	0	0	0	0	0	0	2	0	0	3	0	0	0	0	0	0	0
Estrogen receptor beta (Q92731)	0	0	0	0	160	0	0	0	0	0	0	0	0	0	0	0	0	0	0	0	0	0	0	0	0	0	0	0	0	0	0	0	0	0	0	0	0	0	0	0	0	0	0	0	0	0	0	0	0
[truncated: 7 more columns]

[truncated: 3 more sheets: Reproductive, Respiratory, Substance-related]
