# Supplementary material for: Developing a Molecular Roadmap of Drug-Food Interactions
Source: PLoS Comput Biol. 2015 Feb 10;11(2):e1004048. doi: 10.1371/journal.pcbi.1004048 (PMC4323218; doi:10.1371/journal.pcbi.1004048)
Supplement: S3 Table — Drugs and phytochemicals with activity against the same target protein. (XLSX) [file pcbi.1004048.s003.xlsx]

## Sheet: Cancer
Protein	Drug name	Plant source	Plant compound
P00918	-	TAXID:65948	Caffeic Acid
P00918	-	TAXID:29760	(+)-Catechin
P00918	-	TAXID:29760	Quercetin
P00918	-	TAXID:29760	Resveratrol
P00918	-	TAXID:29760	Caffeic Acid
P00918	-	TAXID:74900	P-Coumaric Acid
P00918	-	TAXID:74900	Quercetin
P00918	-	TAXID:74900	Protocatechuic Acid
P00918	-	TAXID:74900	Caffeic Acid
P00918	-	TAXID:74900	P-Hydroxybenzoic Acid
P00918	-	TAXID:51240	Protocatechuic Acid
P00918	-	TAXID:51240	Caffeic Acid
P00918	-	TAXID:51240	P-Hydroxybenzoic Acid
P00918	-	TAXID:58860	(+)-Catechin
P00918	-	TAXID:4081	Resveratrol
P00918	-	TAXID:4081	Serotonin
P00918	-	TAXID:4081	Spermine
P00918	-	TAXID:4081	Spermidine
P00918	-	TAXID:4081	P-Hydroxybenzoic Acid
P00918	-	TAXID:4081	Quercetin
P00918	-	TAXID:4222	Serotonin
P00918	-	TAXID:4222	Ferric Thiocyanate
P00918	-	TAXID:4222	Quercetin
P00918	-	TAXID:4577	P-Coumaric Acid
P00918	-	TAXID:4577	Spermine
P00918	-	TAXID:4577	Caffeic Acid
P00918	-	TAXID:4577	Phosphoserine
P00918	-	TAXID:4577	Quercetin
P00918	-	TAXID:4577	Tyrosine
P00918	-	TAXID:4577	Tryptophan
P00918	-	TAXID:13894	P-Hydroxybenzoic Acid
P00918	-	TAXID:3983	P-Coumaric Acid
P00918	-	TAXID:3983	Protocatechuic Acid
P00918	-	TAXID:36610	Quercetin
P00918	-	TAXID:4682	P-Coumaric Acid
P00918	-	TAXID:4682	Quercetin
P00918	-	TAXID:4682	Tryptophan
P00918	-	TAXID:4182	Butylated Hydroxytoluene
P00918	-	TAXID:3712	P-Coumaric Acid
P00918	-	TAXID:3712	Quercetin
P00918	-	TAXID:3712	Tannic Acid
P00918	-	TAXID:3712	Caffeic Acid
P00918	-	TAXID:114280	P-Coumaric Acid
P00918	-	TAXID:114280	Quercetin
P00918	-	TAXID:114280	Protocatechuic Acid
P00918	-	TAXID:114280	Caffeic Acid
P00918	-	TAXID:114280	P-Hydroxybenzoic Acid
P00918	-	TAXID:4045	Tyrosol
P00918	-	TAXID:4045	Calcium Propionate
P00918	-	TAXID:4045	Ferulate
P00918	-	TAXID:4045	P-Coumaric Acid
P00918	-	TAXID:4045	Caffeic Acid
P00918	-	TAXID:4045	Quercetin
P00918	-	TAXID:4045	Tryptophan
P00918	-	TAXID:4679	Quercetin
P00918	-	TAXID:4679	Tyrosine
P00918	-	TAXID:4679	Protocatechuic Acid
P00918	-	TAXID:4679	Tryptophan
P00918	-	TAXID:4047	Quercetin
P00918	-	TAXID:4120	Caffeic Acid
P00918	-	TAXID:4530	Guaiacol
P00918	-	TAXID:4530	Ferulate
P00918	-	TAXID:4530	Vinegar
P00918	-	TAXID:4530	P-Hydroxybenzoic Acid
P00918	-	TAXID:4530	Quercetin
P00918	-	TAXID:4530	Histidine
P00918	-	TAXID:4530	Tyrosine
P00918	-	TAXID:41241	(+)-Catechin
P00918	-	TAXID:171929	Tea Polyphenol
P00918	-	TAXID:171929	Guaiacol
P00918	-	TAXID:171929	Isovaleric Acid
P00918	-	TAXID:171929	Tannic Acid
P00918	-	TAXID:3641	(+)-Catechin
P00918	-	TAXID:175228	P-Coumaric Acid
P00918	-	TAXID:175228	Resveratrol
P00918	-	TAXID:175228	Protocatechuic Acid
P00918	-	TAXID:175228	Flavon-3-Ol
P00918	-	TAXID:175228	P-Hydroxybenzoic Acid
P00918	-	TAXID:175228	Quercetin
P00918	-	TAXID:4550	P-Coumaric Acid
P00918	-	TAXID:4550	Vinegar
P00918	-	TAXID:89151	Vinegar
P00918	-	TAXID:89151	Tannic Acid
P00918	-	TAXID:32224	P-Coumaric Acid
P00918	-	TAXID:32224	Tea Polyphenol
P00918	-	TAXID:32224	Protocatechuic Acid
P00918	-	TAXID:32224	O-Coumaric Acid
P00918	-	TAXID:32224	(+)-Catechin
P00918	-	TAXID:4146	P-Coumaric Acid
P00918	-	TAXID:4146	Quercetin
P00918	-	TAXID:4146	Tyrosol
P00918	-	TAXID:4146	Caffeic Acid
P00918	-	TAXID:13731	Guaiacol
P00918	-	TAXID:3469	Quercetin
P00918	-	TAXID:3469	Tyrosine
P00918	-	TAXID:3864	(+)-Catechin
P00918	-	TAXID:3864	Caffeic Acid
P00918	-	TAXID:3864	P-Hydroxybenzoic Acid
P00918	-	TAXID:3621	P-Coumaric Acid
P00918	-	TAXID:3621	Resveratrol
P00918	-	TAXID:3621	Protocatechuic Acid
P00918	-	TAXID:3621	Caffeic Acid
P00918	-	TAXID:3621	P-Hydroxybenzoic Acid
P00918	-	TAXID:29780	Protocatechuic Acid
P00918	-	TAXID:29780	Caffeic Acid
P00918	-	TAXID:29780	(+)-Catechin
P00918	-	TAXID:29780	Ellagic Acid
P00918	-	TAXID:29780	Quercetin
P00918	-	TAXID:29780	Tannic Acid
P00918	-	TAXID:3708	4-Hydroxybenzoate
P00918	-	TAXID:3708	Ferulate
P00918	-	TAXID:3708	Caffeic Acid
P00918	-	TAXID:3708	P-Hydroxybenzoic Acid
P00918	-	TAXID:3708	Quercetin
P00918	-	TAXID:3708	Tryptophan
P00918	-	TAXID:3435	(+)-Catechin
P00918	-	TAXID:3435	Spermine
P00918	-	TAXID:120290	Caffeic Acid
P00918	-	TAXID:120290	(+)-Catechin
P00918	-	TAXID:120290	Ellagic Acid
P00918	-	TAXID:120290	Quercetin
P00918	-	TAXID:120290	Isovaleric Acid
P00918	-	TAXID:120290	Foscarnet
P00918	-	TAXID:48038	Quercetin
P00918	-	TAXID:32247	Ellagic Acid
P00918	-	TAXID:32247	Quercetin
P00918	-	TAXID:32247	Vinegar
P00918	-	TAXID:157791	Vinegar
P00918	-	TAXID:157791	Tryptophan
P00918	-	TAXID:157791	Tannic Acid
P00918	-	TAXID:3818	3,5-Dihydroxybenzoic Acid
P00918	-	TAXID:3818	Resveratrol
P00918	-	TAXID:49827	Caffeic Acid
P00918	-	TAXID:4681	P-Coumaric Acid
P00918	-	TAXID:4681	Protocatechuic Acid
P00918	-	TAXID:4681	Caffeic Acid
P00918	-	TAXID:4681	P-Hydroxybenzoic Acid
P00918	-	TAXID:4681	Quercetin
P00918	-	TAXID:4681	Malonic Acid
P00918	-	TAXID:4513	(+)-Catechin
P00918	-	TAXID:4513	Syringic Acid
P00918	-	TAXID:4513	Caffeic Acid
P00918	-	TAXID:35925	(+)-Catechin
P00918	-	TAXID:35925	Quercetin
P00918	-	TAXID:35925	Vinegar
P00918	-	TAXID:35925	Caffeic Acid
P00918	-	TAXID:3747	Guaiacol
P00918	-	TAXID:3747	P-Coumaric Acid
P00918	-	TAXID:3747	Resveratrol
P00918	-	TAXID:3747	Protocatechuic Acid
P00918	-	TAXID:3747	Caffeic Acid
P00918	-	TAXID:3747	(+)-Catechin
P00918	-	TAXID:3747	Vinegar
P00918	-	TAXID:3747	P-Hydroxybenzoic Acid
P00918	-	TAXID:3747	Ellagic Acid
P00918	-	TAXID:3747	Quercetin
P00918	-	TAXID:3747	Tyrosine
P00918	-	TAXID:3562	Histidine
P00918	-	TAXID:3562	Tryptophan
P00918	-	TAXID:3562	Phosphoserine
P00918	-	TAXID:3888	Carbamoyl Phosphate
P00918	-	TAXID:3888	Histidine
P00918	-	TAXID:3888	Quercetin
P00918	-	TAXID:3888	Tyrosine
P00918	-	TAXID:3888	Pyruvic Acid
P00918	-	TAXID:3888	Tryptophan
P00918	-	TAXID:4565	Quercetin
P00918	-	TAXID:4565	Resveratrol
P00918	-	TAXID:4565	Guaiacol
P00918	-	TAXID:4565	Sodium Diethyldithiocarbamate
P00918	-	TAXID:94328	Serotonin
P00918	-	TAXID:94328	Ferric Thiocyanate
P00918	-	TAXID:4236	Pyrocatechol
P00918	-	TAXID:4236	Vinegar
P00918	-	TAXID:4236	P-Hydroxybenzoic Acid
P00918	-	TAXID:4236	Quercetin
P00918	-	TAXID:151069	Ellagic Acid
P00918	-	TAXID:151069	(+)-Catechin
P00918	-	TAXID:151069	Protocatechuic Acid
P00918	-	TAXID:50225	Quercetin
P00918	-	TAXID:3885	Quercetin
P00918	-	TAXID:3885	Tryptophan
P00918	-	TAXID:128608	Caffeic Acid
P00918	-	TAXID:74645	(+)-Catechin
P00918	-	TAXID:74645	Quercetin
P00918	-	TAXID:51089	Meso-Dihydroguaiaretic Acid
P00918	-	TAXID:51089	Tyrosine
P00918	-	TAXID:4072	Quercetin
P00918	-	TAXID:4072	Vinegar
P00918	-	TAXID:161934	Silymarin
P00918	-	TAXID:180772	P-Coumaric Acid
P00918	-	TAXID:180772	Quercetin
P00918	-	TAXID:180772	Resveratrol
P00918	-	TAXID:13427	Quercetin
P00918	-	TAXID:13427	4-Hydroxyphenylacetic Acid
P00918	-	TAXID:13427	Syringic Acid
P00918	-	TAXID:13427	Caffeic Acid
P00918	-	TAXID:4442	Tea Polyphenol
P00918	-	TAXID:4442	Guaiacol
P00918	-	TAXID:4442	Resveratrol
P00918	-	TAXID:4442	Caffeic Acid
P00918	-	TAXID:4442	(+)-Catechin
P00918	-	TAXID:4442	Quercetin
P00918	-	TAXID:4498	P-Coumaric Acid
P00918	-	TAXID:4498	Caffeic Acid
P00918	-	TAXID:4498	P-Hydroxybenzoic Acid
P00918	-	TAXID:13216	Pyrocatechol
P00918	-	TAXID:13216	Vinegar
P00918	-	TAXID:13216	Butylated Hydroxytoluene
P00918	-	TAXID:13216	Tannic Acid
P00918	-	TAXID:3847	Cadaverine
P00918	-	TAXID:3847	Tryptophan
P00918	-	TAXID:3847	(+)-Catechin
P00918	-	TAXID:3847	P-Nitrophenylphosphate
P00918	-	TAXID:3847	Quercetin
P00918	-	TAXID:3847	Isovaleric Acid
P00918	-	TAXID:3635	Guaiacol
P00918	-	TAXID:22663	Ellagic Acid
P00918	-	TAXID:22663	Quercetin
P00918	-	TAXID:4006	Syringic Acid
P00918	-	TAXID:3711	Spermidine
P00918	-	TAXID:3711	Quercetin
P00918	-	TAXID:3711	Resveratrol
P00918	-	TAXID:3711	Tryptophan
P00918	-	TAXID:3711	Caffeic Acid
P00918	-	TAXID:3659	Quercetin
P00918	-	TAXID:3617	(+)-Catechin
P00918	-	TAXID:3617	Quercetin
P00918	-	TAXID:3617	Tryptophan
P00918	-	TAXID:3617	Tannic Acid
P00918	-	TAXID:4113	P-Coumaric Acid
P00918	-	TAXID:4113	Protocatechuic Acid
P00918	-	TAXID:4113	Serotonin
P00918	-	TAXID:4113	Caffeic Acid
P00918	-	TAXID:4113	Tannic Acid
P00918	-	TAXID:4113	(+)-Catechin
P00918	-	TAXID:4113	Vinegar
P00918	-	TAXID:4113	P-Hydroxybenzoic Acid
P00918	-	TAXID:4113	Tyrosine
P00918	-	TAXID:4113	Tryptophan
P00918	-	TAXID:4111	P-Coumaric Acid
P00918	-	TAXID:4111	Guaiacol
P00918	-	TAXID:4111	Caffeic Acid
P00918	DB01064	-	-
P00918	DB01097	-	-
P00918	DB00153	-	-
P00918	DB00709	-	-
P00918	DB00258	-	-
P00918	DB00259	-	-
P00918	DB00252	-	-
P00918	DB00701	-	-
P00918	DB00703	-	-
P00918	DB00704	-	-
P00918	DB00257	-	-
P00918	DB00254	-	-
P00918	DB00255	-	-
P00918	DB00313	-	-
P00918	DB00311	-	-
P00918	DB00310	-	-
P00918	DB00316	-	-
P00918	DB00091	-	-
P00918	DB00319	-	-
P00918	DB00478	-	-
P00918	DB00570	-	-
P00918	DB00882	-	-
P00918	DB01156	-	-
P00918	DB00184	-	-
P00918	DB01151	-	-
P00918	DB00650	-	-
P00918	DB00227	-	-
P00918	DB00224	-	-
P00918	DB00222	-	-
P00918	DB00220	-	-
P00918	DB00962	-	-
P00918	DB06715	-	-
P00918	DB06710	-	-
P00918	DB03255	-	-
P00918	DB00178	-	-
P00918	DB01075	-	-
P00918	DB01074	-	-
P00918	DB00175	-	-
P00918	DB01076	-	-
P00918	DB00672	-	-
P00918	DB00674	-	-
P00918	DB00675	-	-
P00918	DB00679	-	-
P00918	DB01275	-	-
P00918	DB00251	-	-
P00918	DB00795	-	-
P00918	DB00794	-	-
P00918	DB00793	-	-
P00918	DB00823	-	-
P00918	DB00822	-	-
P00918	DB00415	-	-
P00918	DB00829	-	-
P00918	DB00411	-	-
P00918	DB00412	-	-
P00918	DB00798	-	-
P00918	DB00555	-	-
P00918	DB00554	-	-
P00918	DB00551	-	-
P00918	DB00550	-	-
P00918	DB00553	-	-
P00918	DB00959	-	-
P00918	DB00489	-	-
P00918	DB00488	-	-
P00918	DB00483	-	-
P00918	DB00482	-	-
P00918	DB00481	-	-
P00918	DB00487	-	-
P00918	DB00484	-	-
P00918	DB01103	-	-
P00918	DB01105	-	-
P00918	DB01104	-	-
P00918	DB00214	-	-
P00918	DB00215	-	-
P00918	DB00359	-	-
P00918	DB00357	-	-
P00918	DB00356	-	-
P00918	DB00353	-	-
P00918	DB00350	-	-
P00918	DB06768	-	-
P00918	DB01208	-	-
P00918	DB01203	-	-
P00918	DB01200	-	-
P00918	DB01201	-	-
P00918	DB01611	-	-
P00918	DB01204	-	-
P00918	DB01205	-	-
P00918	DB01199	-	-
P00918	DB01193	-	-
P00918	DB01190	-	-
P00918	DB01191	-	-
P00918	DB01197	-	-
P00918	DB01194	-	-
P00918	DB01037	-	-
P00918	DB01299	-	-
P00918	DB00915	-	-
P00918	DB00384	-	-
P00918	DB00916	-	-
P00918	DB00911	-	-
P00918	DB00529	-	-
P00918	DB00524	-	-
P00918	DB00525	-	-
P00918	DB00919	-	-
P00918	DB00523	-	-
P00918	DB01035	-	-
P00918	DB00135	-	-
P00918	DB01408	-	-
P00918	DB01030	-	-
P00918	DB01032	-	-
P00918	DB01406	-	-
P00918	DB01407	-	-
P00918	DB01400	-	-
P00918	DB00846	-	-
P00918	DB01039	-	-
P00918	DB00951	-	-
P00918	DB00421	-	-
P00918	DB00285	-	-
P00918	DB00284	-	-
P00918	DB00281	-	-
P00918	DB00283	-	-
P00918	DB00437	-	-
P00918	DB00328	-	-
P00918	DB00750	-	-
P00918	DB00756	-	-
P00918	DB00755	-	-
P00918	DB00322	-	-
P00918	DB00320	-	-
P00918	DB00758	-	-
P00918	DB00455	-	-
P00918	DB00324	-	-
P00918	DB00457	-	-
P00918	DB04571	-	-
P00918	DB00420	-	-
P00918	DB00859	-	-
P00918	DB00857	-	-
P00918	DB00850	-	-
P00918	DB00851	-	-
P00918	DB00780	-	-
P00918	DB00428	-	-
P00918	DB00834	-	-
P00918	DB00783	-	-
P00918	DB00784	-	-
P00918	DB00939	-	-
P00918	DB00831	-	-
P00918	DB00393	-	-
P00918	DB00936	-	-
P00918	DB00391	-	-
P00918	DB00390	-	-
P00918	DB00424	-	-
P00918	DB00394	-	-
P00918	DB00547	-	-
P00918	DB00544	-	-
P00918	DB00542	-	-
P00918	DB00543	-	-
P00918	DB00540	-	-
P00918	DB01018	-	-
P00918	DB01016	-	-
P00918	DB01015	-	-
P00918	DB01014	-	-
P00918	DB04868	-	-
P00918	DB01011	-	-
P00918	DB00549	-	-
P00918	DB00233	-	-
P00918	DB00495	-	-
P00918	DB00490	-	-
P00918	DB00493	-	-
P00918	DB08826	-	-
P00918	DB00498	-	-
P00918	DB00499	-	-
P00918	DB00321	-	-
P00918	DB00945	-	-
P00918	DB00734	-	-
P00918	DB00731	-	-
P00918	DB00309	-	-
P00918	DB00733	-	-
P00918	DB00305	-	-
P00918	DB00738	-	-
P00918	DB00302	-	-
P00918	DB01606	-	-
P00918	DB01167	-	-
P00918	DB01166	-	-
P00918	DB01165	-	-
P00918	DB01162	-	-
P00918	DB00426	-	-
P00918	DB01229	-	-
P00918	DB01287	-	-
P00918	DB01186	-	-
P00918	DB01068	-	-
P00918	DB01069	-	-
P00918	DB00160	-	-
P00918	DB00648	-	-
P00918	DB00163	-	-
P00918	DB01062	-	-
P00918	DB01060	-	-
P00918	DB01061	-	-
P00918	DB00641	-	-
P00918	DB01067	-	-
P00918	DB00643	-	-
P00918	DB01065	-	-
P00918	DB01357	-	-
P00918	DB00749	-	-
P00918	DB00298	-	-
P00918	DB00744	-	-
P00918	DB00297	-	-
P00918	DB00740	-	-
P00918	DB00741	-	-
P00918	DB00742	-	-
P00918	DB00291	-	-
P00918	DB00465	-	-
P00918	DB00450	-	-
P00918	DB00467	-	-
P00918	DB00461	-	-
P00918	DB00462	-	-
P00918	DB00469	-	-
P00918	DB00452	-	-
P00918	DB00196	-	-
P00918	DB00190	-	-
P00918	DB00193	-	-
P00918	DB00199	-	-
P00918	DB00869	-	-
P00918	DB00861	-	-
P00918	DB00860	-	-
P00918	DB00863	-	-
P00918	DB00325	-	-
P00918	DB00864	-	-
P00918	DB01113	-	-
P00918	DB01110	-	-
P00918	DB01114	-	-
P00918	DB01115	-	-
P00918	DB00177	-	-
P00918	DB01118	-	-
P00918	DB01119	-	-
P00918	DB01077	-	-
P00918	DB00263	-	-
P00918	DB00262	-	-
P00918	DB00266	-	-
P00918	DB00265	-	-
P00918	DB00264	-	-
P00918	DB00342	-	-
P00918	DB00343	-	-
P00918	DB00347	-	-
P00918	DB00423	-	-
P00918	DB00635	-	-
P00918	DB00636	-	-
P00918	DB00637	-	-
P00918	DB00630	-	-
P00918	DB01233	-	-
P00918	DB01232	-	-
P00918	DB01231	-	-
P00918	DB01235	-	-
P00918	DB01234	-	-
P00918	DB00518	-	-
P00918	DB00904	-	-
P00918	DB01595	-	-
P00918	DB00903	-	-
P00918	DB00513	-	-
P00918	DB00512	-	-
P00918	DB00515	-	-
P00918	DB00514	-	-
P00918	DB00909	-	-
P00918	DB00120	-	-
P00918	DB00688	-	-
P00918	DB00122	-	-
P00918	DB00649	-	-
P00918	DB01023	-	-
P00918	DB00126	-	-
P00918	DB00127	-	-
P00918	DB00681	-	-
P00918	DB00682	-	-
P00918	DB01435	-	-
P00918	DB00684	-	-
P00918	DB01436	-	-
P00918	DB00999	-	-
P00918	DB00995	-	-
P00918	DB00994	-	-
P00918	DB00997	-	-
P00918	DB00996	-	-
P00918	DB00991	-	-
P00918	DB04552	-	-
P00918	DB04573	-	-
P00918	DB00150	-	-
P00918	DB01095	-	-
P00918	DB01092	-	-
P00918	DB01091	-	-
P00918	DB00656	-	-
P00918	DB00655	-	-
P00918	DB00653	-	-
P00918	DB01099	-	-
P00918	DB00651	-	-
P00918	DB01253	-	-
P00918	DB00166	-	-
P00918	DB00788	-	-
P00918	DB00789	-	-
P00918	DB01380	-	-
P00918	DB00935	-	-
P00918	DB00928	-	-
P00918	DB00841	-	-
P00918	DB00934	-	-
P00918	DB00381	-	-
P00918	DB00382	-	-
P00918	DB00844	-	-
P00918	DB00920	-	-
P00918	DB00433	-	-
P00918	DB00848	-	-
P00918	DB00389	-	-
P00918	DB00434	-	-
P00918	DB00396	-	-
P00918	DB01008	-	-
P00918	DB01009	-	-
P00918	DB00531	-	-
P00918	DB00537	-	-
P00918	DB01001	-	-
P00918	DB01002	-	-
P00918	DB01003	-	-
P00918	DB01005	-	-
P00918	DB01006	-	-
P00918	DB00128	-	-
P00918	DB00541	-	-
P00918	DB00279	-	-
P00918	DB00274	-	-
P00918	DB00418	-	-
P00918	DB00277	-	-
P00918	DB00271	-	-
P00918	DB00273	-	-
P00918	DB00376	-	-
P00918	DB00373	-	-
P00918	DB00379	-	-
P00918	DB06150	-	-
P00918	DB01171	-	-
P00918	DB01172	-	-
P00918	DB01173	-	-
P00918	DB01174	-	-
P00918	DB01175	-	-
P00918	DB01176	-	-
P00918	DB01177	-	-
P00918	DB01179	-	-
P00918	DB00970	-	-
P00918	DB00977	-	-
P00918	DB00975	-	-
P00918	DB00502	-	-
P00918	DB00503	-	-
P00918	DB00500	-	-
P00918	DB00978	-	-
P00918	DB01581	-	-
P00918	DB01582	-	-
P00918	DB01053	-	-
P00918	DB00698	-	-
P00918	DB01050	-	-
P00918	DB01056	-	-
P00918	DB01055	-	-
P00918	DB01054	-	-
P00918	DB00692	-	-
P00918	DB01351	-	-
P00918	DB01059	-	-
P00918	DB01058	-	-
P00918	DB00696	-	-
P00918	DB01427	-	-
P00918	DB00694	-	-
P00918	DB00695	-	-
P00918	DB00988	-	-
P00918	DB00987	-	-
P00918	DB00982	-	-
P00918	DB00981	-	-
P00918	DB00591	-	-
P00918	DB00590	-	-
P00918	DB00593	-	-
P00918	DB00595	-	-
P00918	DB00598	-	-
P00918	DB00778	-	-
P00918	DB00809	-	-
P00918	DB00808	-	-
P00918	DB00807	-	-
P00918	DB00806	-	-
P00918	DB00773	-	-
P00918	DB00804	-	-
P00918	DB00776	-	-
P00918	DB00477	-	-
P00918	DB00472	-	-
P00918	DB00836	-	-
P00918	DB00471	-	-
P00918	DB00577	-	-
P00918	DB00576	-	-
P00918	DB00575	-	-
P00918	DB00573	-	-
P00918	DB00572	-	-
P00918	DB00571	-	-
P00918	DB00479	-	-
P00918	DB00186	-	-
P00918	DB00187	-	-
P00918	DB00169	-	-
P00918	DB00180	-	-
P00918	DB00181	-	-
P00918	DB00871	-	-
P00918	DB00877	-	-
P00918	DB00874	-	-
P00918	DB01128	-	-
P00918	DB01121	-	-
P00918	DB01120	-	-
P00918	DB01127	-	-
P00918	DB01125	-	-
P00918	DB00330	-	-
P00918	DB00238	-	-
P00918	DB00239	-	-
P00918	DB00443	-	-
P00918	DB01087	-	-
P00918	DB00235	-	-
P00918	DB00600	-	-
P00918	DB00602	-	-
P00918	DB00604	-	-
P00918	DB01224	-	-
P00918	DB00627	-	-
P00918	DB01221	-	-
P00918	DB01222	-	-
P00918	DB01223	-	-
P00918	DB00898	-	-
P00918	DB00950	-	-
P00918	DB05260	-	-
P00918	DB01339	-	-
P00918	DB00730	-	-
P00918	DB01026	-	-
P00918	DB01148	-	-
P00918	DB01144	-	-
P00918	DB01147	-	-
P00918	DB01143	-	-
P00918	DB01142	-	-
P00918	DB00143	-	-
P00918	DB01082	-	-
P00918	DB00839	-	-
P00918	DB01086	-	-
P00918	DB00145	-	-
P00918	DB00623	-	-
P00918	DB00620	-	-
P00918	DB01325	-	-
P00918	DB00624	-	-
P00918	DB01242	-	-
P00918	DB01241	-	-
P00918	DB01248	-	-
P00918	DB01394	-	-
P00918	DB01396	-	-
P00918	DB01390	-	-
P00918	DB01392	-	-
P00918	DB01393	-	-
P00918	DB06147	-	-
P00918	DB01399	-	-
P00918	DB00818	-	-
P00918	DB00819	-	-
P00918	DB00762	-	-
P00918	DB00763	-	-
P00918	DB00812	-	-
P00918	DB00761	-	-
P00918	DB00814	-	-
P00918	DB00765	-	-
P00918	DB00568	-	-
P00918	DB00401	-	-
P00918	DB00400	-	-
P00918	DB00406	-	-
P00918	DB00404	-	-
P00918	DB00561	-	-
P00918	DB00563	-	-
P00918	DB00564	-	-
P00918	DB04841	-	-
P00918	DB00567	-	-
P00918	DB00759	-	-
P00918	DB01426	-	-
P00918	DB00887	-	-
P00918	DB00884	-	-
P00918	DB00968	-	-
P00918	DB00969	-	-
P00918	DB00881	-	-
P00918	DB06148	-	-
P00918	DB00967	-	-
P00918	DB00960	-	-
P00918	DB00961	-	-
P00918	DB00889	-	-
P00918	DB00963	-	-
P00918	DB06729	-	-
P00918	DB00249	-	-
P00918	DB01021	-	-
P00918	DB00717	-	-
P00918	DB00715	-	-
P00918	DB00242	-	-
P00918	DB00245	-	-
P00918	DB00712	-	-
P00918	DB00247	-	-
P00918	DB00367	-	-
P00918	DB00365	-	-
P00918	DB00363	-	-
P00918	DB00361	-	-
P00918	DB01024	-	-
P00918	DB03166	-	-
P00918	DB01020	-	-
P00918	DB00614	-	-
P00918	DB00615	-	-
P00918	DB01211	-	-
P00918	DB01210	-	-
P00918	DB01213	-	-
P00918	DB00619	-	-
P00918	DB01217	-	-
P00918	DB01216	-	-
P00918	DB06698	-	-
P00918	DB01188	-	-
P00918	DB01627	-	-
P00918	DB01181	-	-
P00918	DB06691	-	-
P00918	DB01183	-	-
P00918	DB01182	-	-
P00918	DB01184	-	-
P00918	DB06697	-	-
P00918	DB00685	-	-
P00918	DB06218	-	-
P00918	DB00811	-	-
P00918	DB01029	-	-
P00918	DB00760	-	-
P00918	DB08807	-	-
P00918	DB04838	-	-
P00918	DB01599	-	-
P00918	DB01044	-	-
P00918	DB01045	-	-
P00918	DB00104	-	-
P00918	DB01047	-	-
P00918	DB01041	-	-
P00918	DB01042	-	-
P00918	DB00661	-	-
P00918	DB00669	-	-
P00918	DB00668	-	-
P00918	DB00583	-	-
P00918	DB00586	-	-
P00918	DB00584	-	-
P00918	DB00585	-	-
P00918	DB08797	-	-
P00918	DB00589	-	-
P00918	DB00339	-	-
P00918	DB00724	-	-
P00918	DB00725	-	-
P00918	DB00722	-	-
P00918	DB00721	-	-
P00918	DB00331	-	-
P00918	DB00446	-	-
P00918	DB00445	-	-
P00918	DB00335	-	-
P00918	DB00334	-	-
P00918	DB00441	-	-
P00918	DB01168	-	-
P00918	DB01136	-	-
P00918	DB01137	-	-
P00918	DB01132	-	-
P00918	DB01206	-	-
P00918	DB00207	-	-
P00918	DB00206	-	-
P00918	DB00201	-	-
P00918	DB00202	-	-
P00918	DB00208	-	-
P00918	DB06770	-	-
P09917	-	TAXID:36610	Quercetin
P09917	-	TAXID:36610	Kaempferol
P09917	-	TAXID:74900	Quercetin
P09917	-	TAXID:74900	Protocatechuic Acid
P09917	-	TAXID:74900	Kaempferol
P09917	-	TAXID:74900	Caffeic Acid
P09917	-	TAXID:51240	Protocatechuic Acid
P09917	-	TAXID:51240	Caffeic Acid
P09917	-	TAXID:4081	Quercetin
P09917	-	TAXID:4222	Quercetin
P09917	-	TAXID:4577	Quercetin
P09917	-	TAXID:4577	Kaempferol
P09917	-	TAXID:4577	Caffeic Acid
P09917	-	TAXID:29760	Quercetin
P09917	-	TAXID:29760	Caffeic Acid
P09917	-	TAXID:4006	Pinoresinol
P09917	-	TAXID:3712	Quercetin
P09917	-	TAXID:3712	Kaempferol
P09917	-	TAXID:3712	Caffeic Acid
P09917	-	TAXID:114280	Quercetin
P09917	-	TAXID:114280	Protocatechuic Acid
P09917	-	TAXID:114280	Caffeic Acid
P09917	-	TAXID:4045	Quercetin
P09917	-	TAXID:4045	Kaempferol
P09917	-	TAXID:4045	Caffeic Acid
P09917	-	TAXID:4679	Quercetin
P09917	-	TAXID:4679	Protocatechuic Acid
P09917	-	TAXID:4679	Kaempferol
P09917	-	TAXID:4047	Quercetin
P09917	-	TAXID:4047	Kaempferol
P09917	-	TAXID:4120	Caffeic Acid
P09917	-	TAXID:4530	Quercetin
P09917	-	TAXID:4530	Guaiacol
P09917	-	TAXID:4530	Kaempferol
P09917	-	TAXID:171929	Guaiacol
P09917	-	TAXID:175228	Quercetin
P09917	-	TAXID:175228	Protocatechuic Acid
P09917	-	TAXID:3635	Guaiacol
P09917	-	TAXID:32224	Protocatechuic Acid
P09917	-	TAXID:4146	Quercetin
P09917	-	TAXID:4146	Kaempferol
P09917	-	TAXID:4146	Caffeic Acid
P09917	-	TAXID:65948	Caffeic Acid
P09917	-	TAXID:3469	Quercetin
P09917	-	TAXID:3469	Kaempferol
P09917	-	TAXID:3864	Caffeic Acid
P09917	-	TAXID:3864	Gentisic Acid
P09917	-	TAXID:3621	Protocatechuic Acid
P09917	-	TAXID:3621	Caffeic Acid
P09917	-	TAXID:29780	Quercetin
P09917	-	TAXID:29780	Protocatechuic Acid
P09917	-	TAXID:29780	Kaempferol
P09917	-	TAXID:29780	Caffeic Acid
P09917	-	TAXID:29780	Gentisic Acid
P09917	-	TAXID:3747	Guaiacol
P09917	-	TAXID:3747	Protocatechuic Acid
P09917	-	TAXID:3747	Kaempferol
P09917	-	TAXID:3747	Caffeic Acid
P09917	-	TAXID:3747	Quercetin
P09917	-	TAXID:3747	Gentisic Acid
P09917	-	TAXID:3617	Quercetin
P09917	-	TAXID:13731	Guaiacol
P09917	-	TAXID:3708	Quercetin
P09917	-	TAXID:3708	Thiouracil
P09917	-	TAXID:3708	Kaempferol
P09917	-	TAXID:3708	Caffeic Acid
P09917	-	TAXID:32247	Quercetin
P09917	-	TAXID:32247	Kaempferol
P09917	-	TAXID:4682	Quercetin
P09917	-	TAXID:4681	Quercetin
P09917	-	TAXID:4681	Protocatechuic Acid
P09917	-	TAXID:4681	Kaempferol
P09917	-	TAXID:4681	Caffeic Acid
P09917	-	TAXID:4513	Caffeic Acid
P09917	-	TAXID:49827	Nordihydroguaiaretic Acid
P09917	-	TAXID:49827	Caffeic Acid
P09917	-	TAXID:35925	Quercetin
P09917	-	TAXID:35925	Kaempferol
P09917	-	TAXID:35925	Caffeic Acid
P09917	-	TAXID:3888	Quercetin
P09917	-	TAXID:3888	Kaempferol
P09917	-	TAXID:4565	Quercetin
P09917	-	TAXID:4565	Guaiacol
P09917	-	TAXID:3983	Pinoresinol
P09917	-	TAXID:3983	Scopoletin
P09917	-	TAXID:3983	Protocatechuic Acid
P09917	-	TAXID:4236	Quercetin
P09917	-	TAXID:4236	Pyrocatechol
P09917	-	TAXID:151069	Protocatechuic Acid
P09917	-	TAXID:151069	Kaempferol
P09917	-	TAXID:151069	Gentisic Acid
P09917	-	TAXID:3885	Quercetin
P09917	-	TAXID:128608	Caffeic Acid
P09917	-	TAXID:4072	Quercetin
P09917	-	TAXID:4072	Honokiol
P09917	-	TAXID:4072	4-Methoxyhonokiol
P09917	-	TAXID:180772	Quercetin
P09917	-	TAXID:180772	Kaempferol
P09917	-	TAXID:13427	Quercetin
P09917	-	TAXID:13427	Scopoletin
P09917	-	TAXID:13427	Caffeic Acid
P09917	-	TAXID:94328	Honokiol
P09917	-	TAXID:4442	Quercetin
P09917	-	TAXID:4442	Guaiacol
P09917	-	TAXID:4442	Kaempferol
P09917	-	TAXID:4442	Caffeic Acid
P09917	-	TAXID:13216	Pyrocatechol
P09917	-	TAXID:4498	Scopoletin
P09917	-	TAXID:4498	Caffeic Acid
P09917	-	TAXID:48038	Quercetin
P09917	-	TAXID:48038	Kaempferol
P09917	-	TAXID:120290	Quercetin
P09917	-	TAXID:120290	Kaempferol
P09917	-	TAXID:120290	Caffeic Acid
P09917	-	TAXID:74645	Quercetin
P09917	-	TAXID:74645	Kaempferol
P09917	-	TAXID:22663	Quercetin
P09917	-	TAXID:3847	Quercetin
P09917	-	TAXID:3847	Kaempferol
P09917	-	TAXID:3711	Quercetin
P09917	-	TAXID:3711	Kaempferol
P09917	-	TAXID:3711	Caffeic Acid
P09917	-	TAXID:3659	Quercetin
P09917	-	TAXID:3659	Kaempferol
P09917	-	TAXID:50225	Quercetin
P09917	-	TAXID:4113	Protocatechuic Acid
P09917	-	TAXID:4113	Caffeic Acid
P09917	-	TAXID:4111	Guaiacol
P09917	-	TAXID:4111	Caffeic Acid
P09917	DB00179	-	-
P09917	DB00788	-	-
P09917	DB01009	-	-
P09917	DB00744	-	-
P09917	DB00341	-	-
P09917	DB00233	-	-
P09917	DB00920	-	-
P09917	DB00328	-	-
P09917	DB01050	-	-
P09917	DB00551	-	-
P09917	DB01243	-	-
P09917	DB00936	-	-
P09917	DB00482	-	-
P09917	DB00967	-	-
P09917	DB00455	-	-
P04629	DB00398	-	-
P04629	DB00317	-	-
P04629	DB06616	-	-
P04629	DB01254	-	-
P04629	DB00685	-	-
P04629	DB00619	-	-
P04629	DB04868	-	-
P04629	DB01268	-	-
P04629	DB05294	-	-
P04629	DB00530	-	-
P04629	DB08877	-	-
P04629	DB00877	-	-
P04629	DB01259	-	-
P04629	DB06589	-	-
P31749	DB02546	-	-
P31749	DB00398	-	-
P31749	DB00317	-	-
P31749	DB06616	-	-
P31749	DB05294	-	-
P31749	DB00227	-	-
P31749	DB00685	-	-
P31749	DB06803	-	-
P31749	DB00619	-	-
P31749	DB06589	-	-
P31749	DB01268	-	-
P31749	DB01254	-	-
P31749	DB00530	-	-
P31749	DB01030	-	-
P31749	DB04868	-	-
P31749	DB01259	-	-
P31749	DB00877	-	-
P31749	DB08877	-	-
O60674	-	TAXID:3435	Staurosporine
O60674	-	TAXID:4236	Goniothalamin
O60674	DB00384	-	-
O60674	DB00398	-	-
O60674	DB00317	-	-
O60674	DB06616	-	-
O60674	DB01254	-	-
O60674	DB06803	-	-
O60674	DB00619	-	-
O60674	DB04868	-	-
O60674	DB01268	-	-
O60674	DB05294	-	-
O60674	DB00530	-	-
O60674	DB08877	-	-
O60674	DB00877	-	-
O60674	DB01259	-	-
O60674	DB06589	-	-
P08581	DB00398	-	-
P08581	DB00317	-	-
P08581	DB06616	-	-
P08581	DB05294	-	-
P08581	DB00685	-	-
P08581	DB00619	-	-
P08581	DB04868	-	-
P08581	DB01268	-	-
P08581	DB01254	-	-
P08581	DB00530	-	-
P08581	DB08877	-	-
P08581	DB00877	-	-
P08581	DB01259	-	-
P08581	DB06589	-	-
P04626	-	TAXID:120290	Ellagic Acid
P04626	-	TAXID:22663	Ellagic Acid
P04626	-	TAXID:3435	Staurosporine
P04626	-	TAXID:32247	Ellagic Acid
P04626	-	TAXID:151069	Ellagic Acid
P04626	-	TAXID:29780	Ellagic Acid
P04626	-	TAXID:3747	Ellagic Acid
P04626	DB01064	-	-
P04626	DB01097	-	-
P04626	DB00153	-	-
P04626	DB00709	-	-
P04626	DB00258	-	-
P04626	DB00259	-	-
P04626	DB00252	-	-
P04626	DB00701	-	-
P04626	DB00251	-	-
P04626	DB00704	-	-
P04626	DB00257	-	-
P04626	DB00254	-	-
P04626	DB00255	-	-
P04626	DB00313	-	-
P04626	DB00310	-	-
P04626	DB00317	-	-
P04626	DB00316	-	-
P04626	DB00091	-	-
P04626	DB00319	-	-
P04626	DB00478	-	-
P04626	DB00570	-	-
P04626	DB00882	-	-
P04626	DB01156	-	-
P04626	DB01151	-	-
P04626	DB00650	-	-
P04626	DB00227	-	-
P04626	DB00224	-	-
P04626	DB00222	-	-
P04626	DB00220	-	-
P04626	DB00962	-	-
P04626	DB06710	-	-
P04626	DB03255	-	-
P04626	DB00178	-	-
P04626	DB01075	-	-
P04626	DB01074	-	-
P04626	DB01077	-	-
P04626	DB01076	-	-
P04626	DB00672	-	-
P04626	DB00674	-	-
P04626	DB00675	-	-
P04626	DB00679	-	-
P04626	DB01275	-	-
P04626	DB00795	-	-
P04626	DB00794	-	-
P04626	DB00793	-	-
P04626	DB00823	-	-
P04626	DB00822	-	-
P04626	DB00415	-	-
P04626	DB00829	-	-
P04626	DB00411	-	-
P04626	DB00412	-	-
P04626	DB00798	-	-
P04626	DB00555	-	-
P04626	DB00554	-	-
P04626	DB00550	-	-
P04626	DB00553	-	-
P04626	DB00959	-	-
P04626	DB00489	-	-
P04626	DB00488	-	-
P04626	DB00483	-	-
P04626	DB00950	-	-
P04626	DB00481	-	-
P04626	DB00487	-	-
P04626	DB00484	-	-
P04626	DB01103	-	-
P04626	DB01105	-	-
P04626	DB01104	-	-
P04626	DB06616	-	-
P04626	DB00214	-	-
P04626	DB00215	-	-
P04626	DB00359	-	-
P04626	DB00357	-	-
P04626	DB00356	-	-
P04626	DB00353	-	-
P04626	DB00350	-	-
P04626	DB01208	-	-
P04626	DB01203	-	-
P04626	DB01200	-	-
P04626	DB01201	-	-
P04626	DB01611	-	-
P04626	DB01204	-	-
P04626	DB01205	-	-
P04626	DB01199	-	-
P04626	DB01193	-	-
P04626	DB01190	-	-
P04626	DB01191	-	-
P04626	DB01197	-	-
P04626	DB01299	-	-
P04626	DB00915	-	-
P04626	DB00384	-	-
P04626	DB00916	-	-
P04626	DB00911	-	-
P04626	DB00529	-	-
P04626	DB00524	-	-
P04626	DB00525	-	-
P04626	DB00919	-	-
P04626	DB00523	-	-
P04626	DB01035	-	-
P04626	DB01037	-	-
P04626	DB01408	-	-
P04626	DB01030	-	-
P04626	DB01032	-	-
P04626	DB01406	-	-
P04626	DB01407	-	-
P04626	DB01400	-	-
P04626	DB00846	-	-
P04626	DB01039	-	-
P04626	DB00951	-	-
P04626	DB00421	-	-
P04626	DB00285	-	-
P04626	DB00284	-	-
P04626	DB00281	-	-
P04626	DB00283	-	-
P04626	DB00389	-	-
P04626	DB00328	-	-
P04626	DB00750	-	-
P04626	DB00756	-	-
P04626	DB00755	-	-
P04626	DB00322	-	-
P04626	DB00320	-	-
P04626	DB00758	-	-
P04626	DB00455	-	-
P04626	DB00324	-	-
P04626	DB00457	-	-
P04626	DB04571	-	-
P04626	DB00859	-	-
P04626	DB00857	-	-
P04626	DB00850	-	-
P04626	DB00851	-	-
P04626	DB00780	-	-
P04626	DB00428	-	-
P04626	DB00834	-	-
P04626	DB00398	-	-
P04626	DB00784	-	-
P04626	DB00939	-	-
P04626	DB00831	-	-
P04626	DB00393	-	-
P04626	DB00789	-	-
P04626	DB00935	-	-
P04626	DB00390	-	-
P04626	DB00424	-	-
P04626	DB00394	-	-
P04626	DB00547	-	-
P04626	DB00544	-	-
P04626	DB00542	-	-
P04626	DB00543	-	-
P04626	DB00540	-	-
P04626	DB01018	-	-
P04626	DB01016	-	-
P04626	DB01015	-	-
P04626	DB01014	-	-
P04626	DB04868	-	-
P04626	DB01011	-	-
P04626	DB00549	-	-
P04626	DB00233	-	-
P04626	DB00495	-	-
P04626	DB00490	-	-
P04626	DB00493	-	-
P04626	DB08826	-	-
P04626	DB00498	-	-
P04626	DB00499	-	-
P04626	DB00321	-	-
P04626	DB00945	-	-
P04626	DB00734	-	-
P04626	DB00731	-	-
P04626	DB00309	-	-
P04626	DB00733	-	-
P04626	DB00305	-	-
P04626	DB00738	-	-
P04626	DB00302	-	-
P04626	DB01606	-	-
P04626	DB01167	-	-
P04626	DB01166	-	-
P04626	DB01165	-	-
P04626	DB01162	-	-
P04626	DB00426	-	-
P04626	DB01168	-	-
P04626	DB01287	-	-
P04626	DB06697	-	-
P04626	DB06589	-	-
P04626	DB01068	-	-
P04626	DB01069	-	-
P04626	DB00649	-	-
P04626	DB00648	-	-
P04626	DB00163	-	-
P04626	DB01062	-	-
P04626	DB01060	-	-
P04626	DB01061	-	-
P04626	DB00641	-	-
P04626	DB01067	-	-
P04626	DB00643	-	-
P04626	DB01065	-	-
P04626	DB01268	-	-
P04626	DB05294	-	-
P04626	DB00749	-	-
P04626	DB00298	-	-
P04626	DB00744	-	-
P04626	DB00297	-	-
P04626	DB00740	-	-
P04626	DB00741	-	-
P04626	DB00742	-	-
P04626	DB00291	-	-
P04626	DB00465	-	-
P04626	DB00450	-	-
P04626	DB00467	-	-
P04626	DB00461	-	-
P04626	DB00462	-	-
P04626	DB00469	-	-
P04626	DB00452	-	-
P04626	DB00194	-	-
P04626	DB00196	-	-
P04626	DB00190	-	-
P04626	DB00193	-	-
P04626	DB00199	-	-
P04626	DB00861	-	-
P04626	DB00860	-	-
P04626	DB00863	-	-
P04626	DB00325	-	-
P04626	DB00864	-	-
P04626	DB01113	-	-
P04626	DB01110	-	-
P04626	DB01114	-	-
P04626	DB01115	-	-
P04626	DB00177	-	-
P04626	DB01118	-	-
P04626	DB01119	-	-
P04626	DB00175	-	-
P04626	DB00263	-	-
P04626	DB00262	-	-
P04626	DB00266	-	-
P04626	DB00265	-	-
P04626	DB00264	-	-
P04626	DB00342	-	-
P04626	DB00343	-	-
P04626	DB00347	-	-
P04626	DB00423	-	-
P04626	DB00635	-	-
P04626	DB00636	-	-
P04626	DB00637	-	-
P04626	DB00630	-	-
P04626	DB01233	-	-
P04626	DB01232	-	-
P04626	DB01231	-	-
P04626	DB01235	-	-
P04626	DB01234	-	-
P04626	DB00104	-	-
P04626	DB00518	-	-
P04626	DB00904	-	-
P04626	DB01047	-	-
P04626	DB00903	-	-
P04626	DB00513	-	-
P04626	DB00512	-	-
P04626	DB00515	-	-
P04626	DB00514	-	-
P04626	DB01026	-	-
P04626	DB00688	-	-
P04626	DB00122	-	-
P04626	DB01023	-	-
P04626	DB00126	-	-
P04626	DB01021	-	-
P04626	DB00681	-	-
P04626	DB00682	-	-
P04626	DB01435	-	-
P04626	DB00684	-	-
P04626	DB01436	-	-
P04626	DB00999	-	-
P04626	DB00995	-	-
P04626	DB00994	-	-
P04626	DB00997	-	-
P04626	DB00996	-	-
P04626	DB00991	-	-
P04626	DB04552	-	-
P04626	DB04573	-	-
P04626	DB00836	-	-
P04626	DB01095	-	-
P04626	DB01092	-	-
P04626	DB01091	-	-
P04626	DB00656	-	-
P04626	DB00655	-	-
P04626	DB01099	-	-
P04626	DB00651	-	-
P04626	DB01254	-	-
P04626	DB00783	-	-
P04626	DB01253	-	-
P04626	DB00166	-	-
P04626	DB01259	-	-
P04626	DB00788	-	-
P04626	DB00420	-	-
P04626	DB01380	-	-
P04626	DB00391	-	-
P04626	DB00928	-	-
P04626	DB00841	-	-
P04626	DB00934	-	-
P04626	DB00381	-	-
P04626	DB00382	-	-
P04626	DB00844	-	-
P04626	DB00920	-	-
P04626	DB00433	-	-
P04626	DB00848	-	-
P04626	DB00437	-	-
P04626	DB00434	-	-
P04626	DB00396	-	-
P04626	DB01008	-	-
P04626	DB01009	-	-
P04626	DB00531	-	-
P04626	DB00530	-	-
P04626	DB00537	-	-
P04626	DB01001	-	-
P04626	DB01002	-	-
P04626	DB01003	-	-
P04626	DB01005	-	-
P04626	DB01006	-	-
P04626	DB00541	-	-
P04626	DB00279	-	-
P04626	DB00274	-	-
P04626	DB00418	-	-
P04626	DB00277	-	-
P04626	DB00271	-	-
P04626	DB00376	-	-
P04626	DB00373	-	-
P04626	DB00379	-	-
P04626	DB06150	-	-
P04626	DB01171	-	-
P04626	DB01172	-	-
P04626	DB01173	-	-
P04626	DB01174	-	-
P04626	DB01175	-	-
P04626	DB01176	-	-
P04626	DB01177	-	-
P04626	DB01179	-	-
P04626	DB00640	-	-
P04626	DB00970	-	-
P04626	DB00977	-	-
P04626	DB00975	-	-
P04626	DB00502	-	-
P04626	DB00503	-	-
P04626	DB00500	-	-
P04626	DB00978	-	-
P04626	DB01581	-	-
P04626	DB01582	-	-
P04626	DB01053	-	-
P04626	DB00698	-	-
P04626	DB01050	-	-
P04626	DB01056	-	-
P04626	DB01055	-	-
P04626	DB01054	-	-
P04626	DB00692	-	-
P04626	DB01351	-	-
P04626	DB01059	-	-
P04626	DB01058	-	-
P04626	DB00696	-	-
P04626	DB01427	-	-
P04626	DB00694	-	-
P04626	DB00695	-	-
P04626	DB00987	-	-
P04626	DB00982	-	-
P04626	DB00981	-	-
P04626	DB00591	-	-
P04626	DB00590	-	-
P04626	DB00593	-	-
P04626	DB00595	-	-
P04626	DB00598	-	-
P04626	DB00778	-	-
P04626	DB00809	-	-
P04626	DB00808	-	-
P04626	DB00807	-	-
P04626	DB00806	-	-
P04626	DB00773	-	-
P04626	DB00804	-	-
P04626	DB00776	-	-
P04626	DB00477	-	-
P04626	DB00472	-	-
P04626	DB00471	-	-
P04626	DB00577	-	-
P04626	DB00576	-	-
P04626	DB00575	-	-
P04626	DB00573	-	-
P04626	DB00572	-	-
P04626	DB00571	-	-
P04626	DB00479	-	-
P04626	DB00186	-	-
P04626	DB00187	-	-
P04626	DB00184	-	-
P04626	DB00180	-	-
P04626	DB00181	-	-
P04626	DB00871	-	-
P04626	DB00877	-	-
P04626	DB00874	-	-
P04626	DB01128	-	-
P04626	DB01121	-	-
P04626	DB01120	-	-
P04626	DB01127	-	-
P04626	DB01125	-	-
P04626	DB00330	-	-
P04626	DB00238	-	-
P04626	DB00239	-	-
P04626	DB00443	-	-
P04626	DB01087	-	-
P04626	DB00235	-	-
P04626	DB00600	-	-
P04626	DB00602	-	-
P04626	DB00604	-	-
P04626	DB01224	-	-
P04626	DB01221	-	-
P04626	DB01222	-	-
P04626	DB01223	-	-
P04626	DB00898	-	-
P04626	DB00482	-	-
P04626	DB00936	-	-
P04626	DB01339	-	-
P04626	DB00730	-	-
P04626	DB01148	-	-
P04626	DB01147	-	-
P04626	DB01143	-	-
P04626	DB01142	-	-
P04626	DB01082	-	-
P04626	DB00839	-	-
P04626	DB01086	-	-
P04626	DB00145	-	-
P04626	DB00623	-	-
P04626	DB00620	-	-
P04626	DB00627	-	-
P04626	DB00624	-	-
P04626	DB01242	-	-
P04626	DB01241	-	-
P04626	DB01248	-	-
P04626	DB01394	-	-
P04626	DB01396	-	-
P04626	DB06148	-	-
P04626	DB00169	-	-
P04626	DB01392	-	-
P04626	DB01393	-	-
P04626	DB06147	-	-
P04626	DB01399	-	-
P04626	DB00818	-	-
P04626	DB00819	-	-
P04626	DB00762	-	-
P04626	DB00763	-	-
P04626	DB00812	-	-
P04626	DB00814	-	-
P04626	DB00765	-	-
P04626	DB00568	-	-
P04626	DB00401	-	-
P04626	DB00400	-	-
P04626	DB00406	-	-
P04626	DB00404	-	-
P04626	DB00561	-	-
P04626	DB00563	-	-
P04626	DB00564	-	-
P04626	DB04841	-	-
P04626	DB00567	-	-
P04626	DB00759	-	-
P04626	DB01426	-	-
P04626	DB00884	-	-
P04626	DB00968	-	-
P04626	DB00969	-	-
P04626	DB00881	-	-
P04626	DB00967	-	-
P04626	DB00960	-	-
P04626	DB00961	-	-
P04626	DB00889	-	-
P04626	DB00963	-	-
P04626	DB06729	-	-
P04626	DB00249	-	-
P04626	DB00717	-	-
P04626	DB00715	-	-
P04626	DB00242	-	-
P04626	DB00245	-	-
P04626	DB00712	-	-
P04626	DB00247	-	-
P04626	DB00367	-	-
P04626	DB00365	-	-
P04626	DB00363	-	-
P04626	DB00361	-	-
P04626	DB01024	-	-
P04626	DB03166	-	-
P04626	DB00614	-	-
P04626	DB00615	-	-
P04626	DB01211	-	-
P04626	DB01210	-	-
P04626	DB01213	-	-
P04626	DB00619	-	-
P04626	DB01217	-	-
P04626	DB01216	-	-
P04626	DB06698	-	-
P04626	DB01188	-	-
P04626	DB01627	-	-
P04626	DB01181	-	-
P04626	DB06691	-	-
P04626	DB01183	-	-
P04626	DB01182	-	-
P04626	DB01184	-	-
P04626	DB01186	-	-
P04626	DB00685	-	-
P04626	DB00811	-	-
P04626	DB01029	-	-
P04626	DB00760	-	-
P04626	DB08807	-	-
P04626	DB04838	-	-
P04626	DB01599	-	-
P04626	DB01044	-	-
P04626	DB01045	-	-
P04626	DB01229	-	-
P04626	DB01595	-	-
P04626	DB01041	-	-
P04626	DB01042	-	-
P04626	DB00661	-	-
P04626	DB01357	-	-
P04626	DB00669	-	-
P04626	DB00668	-	-
P04626	DB00583	-	-
P04626	DB00586	-	-
P04626	DB08877	-	-
P04626	DB00584	-	-
P04626	DB00585	-	-
P04626	DB08797	-	-
P04626	DB00589	-	-
P04626	DB00339	-	-
P04626	DB00724	-	-
P04626	DB00725	-	-
P04626	DB00722	-	-
P04626	DB00721	-	-
P04626	DB00331	-	-
P04626	DB00446	-	-
P04626	DB00445	-	-
P04626	DB00335	-	-
P04626	DB00334	-	-
P04626	DB00441	-	-
P04626	DB01136	-	-
P04626	DB01137	-	-
P04626	DB01132	-	-
P04626	DB01206	-	-
P04626	DB00207	-	-
P04626	DB00206	-	-
P04626	DB00201	-	-
P04626	DB00202	-	-
P04626	DB00208	-	-
P04626	DB06770	-	-
P35354	-	TAXID:29760	Quercetin
P35354	-	TAXID:29760	Resveratrol
P35354	-	TAXID:74900	Quercetin
P35354	-	TAXID:74900	Kaempferol
P35354	-	TAXID:175228	Quercetin
P35354	-	TAXID:175228	Resveratrol
P35354	-	TAXID:4081	Quercetin
P35354	-	TAXID:4081	Resveratrol
P35354	-	TAXID:4442	Quercetin
P35354	-	TAXID:4442	Resveratrol
P35354	-	TAXID:4442	Kaempferol
P35354	-	TAXID:4577	Quercetin
P35354	-	TAXID:4577	Kaempferol
P35354	-	TAXID:36610	Quercetin
P35354	-	TAXID:36610	Kaempferol
P35354	-	TAXID:3712	Quercetin
P35354	-	TAXID:3712	Kaempferol
P35354	-	TAXID:114280	Quercetin
P35354	-	TAXID:4045	Quercetin
P35354	-	TAXID:4045	Kaempferol
P35354	-	TAXID:4679	Quercetin
P35354	-	TAXID:4679	Kaempferol
P35354	-	TAXID:4047	Quercetin
P35354	-	TAXID:4047	Kaempferol
P35354	-	TAXID:4530	Quercetin
P35354	-	TAXID:4530	Kaempferol
P35354	-	TAXID:3847	Quercetin
P35354	-	TAXID:3847	Kaempferol
P35354	-	TAXID:4146	Quercetin
P35354	-	TAXID:4146	Kaempferol
P35354	-	TAXID:3469	Quercetin
P35354	-	TAXID:3469	Kaempferol
P35354	-	TAXID:3621	Resveratrol
P35354	-	TAXID:29780	Quercetin
P35354	-	TAXID:29780	Kaempferol
P35354	-	TAXID:3708	Quercetin
P35354	-	TAXID:3708	Kaempferol
P35354	-	TAXID:49827	Nordihydroguaiaretic Acid
P35354	-	TAXID:32247	Quercetin
P35354	-	TAXID:32247	Kaempferol
P35354	-	TAXID:4682	Quercetin
P35354	-	TAXID:3818	Resveratrol
P35354	-	TAXID:3983	Pinoresinol
P35354	-	TAXID:3983	Scopoletin
P35354	-	TAXID:4681	Quercetin
P35354	-	TAXID:4681	Kaempferol
P35354	-	TAXID:3747	Quercetin
P35354	-	TAXID:3747	Resveratrol
P35354	-	TAXID:3747	Kaempferol
P35354	-	TAXID:35925	Quercetin
P35354	-	TAXID:35925	Kaempferol
P35354	-	TAXID:3888	Quercetin
P35354	-	TAXID:3888	Kaempferol
P35354	-	TAXID:4565	Quercetin
P35354	-	TAXID:4565	Resveratrol
P35354	-	TAXID:4072	Quercetin
P35354	-	TAXID:4072	4-Methoxyhonokiol
P35354	-	TAXID:4236	Quercetin
P35354	-	TAXID:151069	Kaempferol
P35354	-	TAXID:41241	Cinnamtannin B1
P35354	-	TAXID:3885	Quercetin
P35354	-	TAXID:3617	Quercetin
P35354	-	TAXID:180772	Cinnamtannin B1
P35354	-	TAXID:180772	Quercetin
P35354	-	TAXID:180772	Resveratrol
P35354	-	TAXID:180772	Kaempferol
P35354	-	TAXID:13427	Quercetin
P35354	-	TAXID:13427	Scopoletin
P35354	-	TAXID:4222	Quercetin
P35354	-	TAXID:4498	Scopoletin
P35354	-	TAXID:48038	Quercetin
P35354	-	TAXID:48038	Kaempferol
P35354	-	TAXID:120290	Quercetin
P35354	-	TAXID:120290	Kaempferol
P35354	-	TAXID:74645	Quercetin
P35354	-	TAXID:74645	Kaempferol
P35354	-	TAXID:22663	Quercetin
P35354	-	TAXID:4006	Pinoresinol
P35354	-	TAXID:3711	Quercetin
P35354	-	TAXID:3711	Resveratrol
P35354	-	TAXID:3711	Kaempferol
P35354	-	TAXID:3659	Quercetin
P35354	-	TAXID:3659	Kaempferol
P35354	-	TAXID:50225	Quercetin
P35354	DB01064	-	-
P35354	DB01097	-	-
P35354	DB00153	-	-
P35354	DB00709	-	-
P35354	DB00258	-	-
P35354	DB00259	-	-
P35354	DB00252	-	-
P35354	DB00701	-	-
P35354	DB00251	-	-
P35354	DB00704	-	-
P35354	DB00257	-	-
P35354	DB00254	-	-
P35354	DB00255	-	-
P35354	DB00313	-	-
P35354	DB00310	-	-
P35354	DB00316	-	-
P35354	DB00091	-	-
P35354	DB00319	-	-
P35354	DB00478	-	-
P35354	DB00570	-	-
P35354	DB00882	-	-
P35354	DB01156	-	-
P35354	DB01151	-	-
P35354	DB00650	-	-
P35354	DB00227	-	-
P35354	DB00224	-	-
P35354	DB00222	-	-
P35354	DB00220	-	-
P35354	DB00962	-	-
P35354	DB06710	-	-
P35354	DB00179	-	-
P35354	DB00178	-	-
P35354	DB01075	-	-
P35354	DB00166	-	-
P35354	DB01077	-	-
P35354	DB01076	-	-
P35354	DB00672	-	-
P35354	DB00674	-	-
P35354	DB00675	-	-
P35354	DB00679	-	-
P35354	DB01275	-	-
P35354	DB00825	-	-
P35354	DB00795	-	-
P35354	DB00794	-	-
P35354	DB00793	-	-
P35354	DB00823	-	-
P35354	DB00822	-	-
P35354	DB00415	-	-
P35354	DB00829	-	-
P35354	DB00411	-	-
P35354	DB00412	-	-
P35354	DB00798	-	-
P35354	DB00555	-	-
P35354	DB00554	-	-
P35354	DB00550	-	-
P35354	DB00553	-	-
P35354	DB00959	-	-
P35354	DB00489	-	-
P35354	DB00488	-	-
P35354	DB00483	-	-
P35354	DB00482	-	-
P35354	DB00481	-	-
P35354	DB00487	-	-
P35354	DB00484	-	-
P35354	DB01103	-	-
P35354	DB01105	-	-
P35354	DB01104	-	-
P35354	DB00214	-	-
P35354	DB00215	-	-
P35354	DB00359	-	-
P35354	DB00357	-	-
P35354	DB00356	-	-
P35354	DB00353	-	-
P35354	DB00350	-	-
P35354	DB01208	-	-
P35354	DB01203	-	-
P35354	DB01200	-	-
P35354	DB01201	-	-
P35354	DB01611	-	-
P35354	DB01204	-	-
P35354	DB01205	-	-
P35354	DB01199	-	-
P35354	DB01193	-	-
P35354	DB01190	-	-
P35354	DB01191	-	-
P35354	DB01197	-	-
P35354	DB01299	-	-
P35354	DB00915	-	-
P35354	DB00384	-	-
P35354	DB00917	-	-
P35354	DB00916	-	-
P35354	DB00911	-	-
P35354	DB00529	-	-
P35354	DB00524	-	-
P35354	DB00525	-	-
P35354	DB00919	-	-
P35354	DB00523	-	-
P35354	DB01035	-	-
P35354	DB01037	-	-
P35354	DB01408	-	-
P35354	DB01030	-	-
P35354	DB01032	-	-
P35354	DB01406	-	-
P35354	DB01407	-	-
P35354	DB01400	-	-
P35354	DB00846	-	-
P35354	DB01039	-	-
P35354	DB00951	-	-
P35354	DB00421	-	-
P35354	DB00285	-	-
P35354	DB00284	-	-
P35354	DB00281	-	-
P35354	DB00283	-	-
P35354	DB00389	-	-
P35354	DB00328	-	-
P35354	DB00750	-	-
P35354	DB00756	-	-
P35354	DB00755	-	-
P35354	DB00322	-	-
P35354	DB00320	-	-
P35354	DB00758	-	-
P35354	DB00455	-	-
P35354	DB00324	-	-
P35354	DB00457	-	-
P35354	DB04571	-	-
P35354	DB00859	-	-
P35354	DB00857	-	-
P35354	DB00850	-	-
P35354	DB00851	-	-
P35354	DB00780	-	-
P35354	DB00428	-	-
P35354	DB00834	-	-
P35354	DB00783	-	-
P35354	DB00784	-	-
P35354	DB00939	-	-
P35354	DB00831	-	-
P35354	DB00788	-	-
P35354	DB00789	-	-
P35354	DB00935	-	-
P35354	DB00390	-	-
P35354	DB00424	-	-
P35354	DB00394	-	-
P35354	DB00547	-	-
P35354	DB00544	-	-
P35354	DB00542	-	-
P35354	DB00543	-	-
P35354	DB00540	-	-
P35354	DB01018	-	-
P35354	DB01016	-	-
P35354	DB01015	-	-
P35354	DB01014	-	-
P35354	DB01011	-	-
P35354	DB00549	-	-
P35354	DB00233	-	-
P35354	DB00495	-	-
P35354	DB00490	-	-
P35354	DB00493	-	-
P35354	DB08826	-	-
P35354	DB00498	-	-
P35354	DB00499	-	-
P35354	DB00321	-	-
P35354	DB00945	-	-
P35354	DB03255	-	-
P35354	DB00734	-	-
P35354	DB00731	-	-
P35354	DB00309	-	-
P35354	DB00733	-	-
P35354	DB00305	-	-
P35354	DB00738	-	-
P35354	DB00302	-	-
P35354	DB01606	-	-
P35354	DB01167	-	-
P35354	DB01166	-	-
P35354	DB01165	-	-
P35354	DB01162	-	-
P35354	DB00426	-	-
P35354	DB01168	-	-
P35354	DB01628	-	-
P35354	DB01283	-	-
P35354	DB01287	-	-
P35354	DB06697	-	-
P35354	DB01068	-	-
P35354	DB01069	-	-
P35354	DB00649	-	-
P35354	DB00648	-	-
P35354	DB00163	-	-
P35354	DB01062	-	-
P35354	DB01060	-	-
P35354	DB01061	-	-
P35354	DB00641	-	-
P35354	DB01067	-	-
P35354	DB00643	-	-
P35354	DB01065	-	-
P35354	DB01357	-	-
P35354	DB00749	-	-
P35354	DB00298	-	-
P35354	DB00744	-	-
P35354	DB00297	-	-
P35354	DB00747	-	-
P35354	DB00740	-	-
P35354	DB00741	-	-
P35354	DB00742	-	-
P35354	DB00291	-	-
P35354	DB00465	-	-
P35354	DB00450	-	-
P35354	DB00467	-	-
P35354	DB00461	-	-
P35354	DB00462	-	-
P35354	DB00469	-	-
P35354	DB00452	-	-
P35354	DB00196	-	-
P35354	DB00190	-	-
P35354	DB00193	-	-
P35354	DB00199	-	-
P35354	DB00861	-	-
P35354	DB00860	-	-
P35354	DB00863	-	-
P35354	DB00325	-	-
P35354	DB00864	-	-
P35354	DB01113	-	-
P35354	DB01110	-	-
P35354	DB01114	-	-
P35354	DB01115	-	-
P35354	DB00177	-	-
P35354	DB01118	-	-
P35354	DB01119	-	-
P35354	DB01074	-	-
P35354	DB00175	-	-
P35354	DB00263	-	-
P35354	DB00262	-	-
P35354	DB00266	-	-
P35354	DB00265	-	-
P35354	DB00264	-	-
P35354	DB00342	-	-
P35354	DB00343	-	-
P35354	DB00347	-	-
P35354	DB00423	-	-
P35354	DB00635	-	-
P35354	DB00636	-	-
P35354	DB00637	-	-
P35354	DB00630	-	-
P35354	DB01233	-	-
P35354	DB01232	-	-
P35354	DB01231	-	-
P35354	DB01235	-	-
P35354	DB01234	-	-
P35354	DB00104	-	-
P35354	DB00518	-	-
P35354	DB00904	-	-
P35354	DB01047	-	-
P35354	DB00903	-	-
P35354	DB00513	-	-
P35354	DB00512	-	-
P35354	DB00515	-	-
P35354	DB00514	-	-
P35354	DB01026	-	-
P35354	DB00688	-	-
P35354	DB00122	-	-
P35354	DB01023	-	-
P35354	DB00126	-	-
P35354	DB01021	-	-
P35354	DB00681	-	-
P35354	DB00682	-	-
P35354	DB01435	-	-
P35354	DB00684	-	-
P35354	DB01436	-	-
P35354	DB00999	-	-
P35354	DB00995	-	-
P35354	DB00994	-	-
P35354	DB00997	-	-
P35354	DB00996	-	-
P35354	DB00991	-	-
P35354	DB04552	-	-
P35354	DB04573	-	-
P35354	DB00836	-	-
P35354	DB01095	-	-
P35354	DB01092	-	-
P35354	DB01091	-	-
P35354	DB00656	-	-
P35354	DB00655	-	-
P35354	DB01099	-	-
P35354	DB00651	-	-
P35354	DB01253	-	-
P35354	DB00393	-	-
P35354	DB00420	-	-
P35354	DB01380	-	-
P35354	DB00391	-	-
P35354	DB00928	-	-
P35354	DB00841	-	-
P35354	DB00934	-	-
P35354	DB00381	-	-
P35354	DB00382	-	-
P35354	DB00844	-	-
P35354	DB00920	-	-
P35354	DB00433	-	-
P35354	DB00848	-	-
P35354	DB00437	-	-
P35354	DB00434	-	-
P35354	DB00396	-	-
P35354	DB01008	-	-
P35354	DB01009	-	-
P35354	DB00531	-	-
P35354	DB00537	-	-
P35354	DB01001	-	-
P35354	DB01002	-	-
P35354	DB01003	-	-
P35354	DB01005	-	-
P35354	DB01006	-	-
P35354	DB00541	-	-
P35354	DB00279	-	-
P35354	DB00274	-	-
P35354	DB00821	-	-
P35354	DB00277	-	-
P35354	DB00271	-	-
P35354	DB00376	-	-
P35354	DB00373	-	-
P35354	DB00379	-	-
P35354	DB06150	-	-
P35354	DB01171	-	-
P35354	DB01172	-	-
P35354	DB01173	-	-
P35354	DB01174	-	-
P35354	DB01175	-	-
P35354	DB01176	-	-
P35354	DB01177	-	-
P35354	DB01179	-	-
P35354	DB00970	-	-
P35354	DB00977	-	-
P35354	DB00975	-	-
P35354	DB00502	-	-
P35354	DB00503	-	-
P35354	DB00500	-	-
P35354	DB00978	-	-
P35354	DB01581	-	-
P35354	DB01582	-	-
P35354	DB01053	-	-
P35354	DB00698	-	-
P35354	DB01050	-	-
P35354	DB01056	-	-
P35354	DB01055	-	-
P35354	DB01054	-	-
P35354	DB00692	-	-
P35354	DB01351	-	-
P35354	DB01059	-	-
P35354	DB01058	-	-
P35354	DB00696	-	-
P35354	DB01427	-	-
P35354	DB00694	-	-
P35354	DB00695	-	-
P35354	DB00987	-	-
P35354	DB00982	-	-
P35354	DB00981	-	-
P35354	DB00591	-	-
P35354	DB00590	-	-
P35354	DB00593	-	-
P35354	DB00595	-	-
P35354	DB00598	-	-
P35354	DB00778	-	-
P35354	DB00809	-	-
P35354	DB00808	-	-
P35354	DB00807	-	-
P35354	DB00806	-	-
P35354	DB00773	-	-
P35354	DB00804	-	-
P35354	DB00776	-	-
P35354	DB00477	-	-
P35354	DB00472	-	-
P35354	DB00471	-	-
[truncated: 8,244 more rows]

## Sheet: Cardiovascular
Protein	Drug name	Plant source	Plant compound
P41145	-	TAXID:65948	Apigenin
P41145	-	TAXID:74900	Hyperin
P41145	-	TAXID:51240	(-)-Epigallocatechin
P41145	-	TAXID:58860	(+)-Catechin
P41145	-	TAXID:4081	Naringenin
P41145	-	TAXID:4442	(-)-Epigallocatechin
P41145	-	TAXID:4442	Hesperetin
P41145	-	TAXID:4442	(+)-Catechin
P41145	-	TAXID:4442	Apigenin
P41145	-	TAXID:4442	Daidzein
P41145	-	TAXID:4442	Epicatechin Gallate
P41145	-	TAXID:4442	Naringenin
P41145	-	TAXID:4577	Naringenin
P41145	-	TAXID:36610	Apigenin
P41145	-	TAXID:36610	Hyperin
P41145	-	TAXID:4513	(+)-Catechin
P41145	-	TAXID:4679	Taxifolin
P41145	-	TAXID:4047	Falcarindiol
P41145	-	TAXID:78168	Apigenin
P41145	-	TAXID:175228	Taxifolin
P41145	-	TAXID:89151	Apigenin
P41145	-	TAXID:3760	Hesperetin
P41145	-	TAXID:32224	(+)-Catechin
P41145	-	TAXID:32224	(-)-Epigallocatechin
P41145	-	TAXID:4146	Apigenin
P41145	-	TAXID:4045	Apigenin
P41145	-	TAXID:4045	Hyperin
P41145	-	TAXID:3469	Tramadol
P41145	-	TAXID:3864	(+)-Catechin
P41145	-	TAXID:29760	(+)-Catechin
P41145	-	TAXID:29760	(-)-Epigallocatechin
P41145	-	TAXID:29780	(+)-Catechin
P41145	-	TAXID:29780	(-)-Epigallocatechin
P41145	-	TAXID:3649	Daidzein
P41145	-	TAXID:3747	(+)-Catechin
P41145	-	TAXID:3747	Naringenin
P41145	-	TAXID:3747	(-)-Epigallocatechin
P41145	-	TAXID:3708	Naringenin
P41145	-	TAXID:120290	(+)-Catechin
P41145	-	TAXID:120290	Naringenin
P41145	-	TAXID:120290	Hyperin
P41145	-	TAXID:40922	Falcarindiol
P41145	-	TAXID:4681	Hyperin
P41145	-	TAXID:49827	Naringenin
P41145	-	TAXID:35925	(+)-Catechin
P41145	-	TAXID:35925	(-)-Epigallocatechin
P41145	-	TAXID:3888	Naringenin
P41145	-	TAXID:3888	Daidzein
P41145	-	TAXID:94328	Apigenin
P41145	-	TAXID:151069	(+)-Catechin
P41145	-	TAXID:151069	Taxifolin
P41145	-	TAXID:41241	(+)-Catechin
P41145	-	TAXID:4072	Apigenin
P41145	-	TAXID:48038	Falcarindiol
P41145	-	TAXID:3847	(+)-Catechin
P41145	-	TAXID:3847	Apigenin
P41145	-	TAXID:3847	Naringenin
P41145	-	TAXID:3847	Daidzein
P41145	-	TAXID:74645	(+)-Catechin
P41145	-	TAXID:22663	(-)-Epigallocatechin
P41145	-	TAXID:3435	(+)-Catechin
P41145	-	TAXID:3617	(+)-Catechin
P41145	-	TAXID:4039	Falcarindiol
P41145	-	TAXID:4113	(+)-Catechin
P41145	-	TAXID:3641	(+)-Catechin
P41145	DB01064	-	-
P41145	DB01097	-	-
P41145	DB00153	-	-
P41145	DB00709	-	-
P41145	DB00258	-	-
P41145	DB00259	-	-
P41145	DB00252	-	-
P41145	DB00701	-	-
P41145	DB00251	-	-
P41145	DB00704	-	-
P41145	DB00257	-	-
P41145	DB00254	-	-
P41145	DB00255	-	-
P41145	DB00313	-	-
P41145	DB00310	-	-
P41145	DB00316	-	-
P41145	DB00091	-	-
P41145	DB00319	-	-
P41145	DB00318	-	-
P41145	DB00478	-	-
P41145	DB00570	-	-
P41145	DB00882	-	-
P41145	DB06274	-	-
P41145	DB01156	-	-
P41145	DB01151	-	-
P41145	DB00650	-	-
P41145	DB00227	-	-
P41145	DB00224	-	-
P41145	DB00222	-	-
P41145	DB00220	-	-
P41145	DB00962	-	-
P41145	DB06710	-	-
P41145	DB03255	-	-
P41145	DB00178	-	-
P41145	DB01075	-	-
P41145	DB01074	-	-
P41145	DB01077	-	-
P41145	DB01076	-	-
P41145	DB00672	-	-
P41145	DB00674	-	-
P41145	DB00675	-	-
P41145	DB00679	-	-
P41145	DB01275	-	-
P41145	DB00795	-	-
P41145	DB00794	-	-
P41145	DB00793	-	-
P41145	DB00823	-	-
P41145	DB00822	-	-
P41145	DB00415	-	-
P41145	DB00829	-	-
P41145	DB00411	-	-
P41145	DB00412	-	-
P41145	DB00798	-	-
P41145	DB00555	-	-
P41145	DB00554	-	-
P41145	DB00550	-	-
P41145	DB00553	-	-
P41145	DB00959	-	-
P41145	DB00489	-	-
P41145	DB00488	-	-
P41145	DB00483	-	-
P41145	DB00950	-	-
P41145	DB00481	-	-
P41145	DB00487	-	-
P41145	DB00484	-	-
P41145	DB01100	-	-
P41145	DB01103	-	-
P41145	DB01105	-	-
P41145	DB01104	-	-
P41145	DB00214	-	-
P41145	DB00215	-	-
P41145	DB00359	-	-
P41145	DB00357	-	-
P41145	DB00356	-	-
P41145	DB00353	-	-
P41145	DB00350	-	-
P41145	DB01208	-	-
P41145	DB01203	-	-
P41145	DB01200	-	-
P41145	DB01201	-	-
P41145	DB01611	-	-
P41145	DB01204	-	-
P41145	DB01205	-	-
P41145	DB01199	-	-
P41145	DB01193	-	-
P41145	DB01190	-	-
P41145	DB01191	-	-
P41145	DB01197	-	-
P41145	DB01299	-	-
P41145	DB00915	-	-
P41145	DB00384	-	-
P41145	DB00916	-	-
P41145	DB00911	-	-
P41145	DB00529	-	-
P41145	DB00524	-	-
P41145	DB00525	-	-
P41145	DB00919	-	-
P41145	DB00523	-	-
P41145	DB01035	-	-
P41145	DB01037	-	-
P41145	DB01408	-	-
P41145	DB01030	-	-
P41145	DB01032	-	-
P41145	DB01406	-	-
P41145	DB01407	-	-
P41145	DB01400	-	-
P41145	DB00846	-	-
P41145	DB01039	-	-
P41145	DB00951	-	-
P41145	DB00433	-	-
P41145	DB00421	-	-
P41145	DB00285	-	-
P41145	DB00284	-	-
P41145	DB00281	-	-
P41145	DB00283	-	-
P41145	DB00437	-	-
P41145	DB00328	-	-
P41145	DB00750	-	-
P41145	DB00756	-	-
P41145	DB00755	-	-
P41145	DB00322	-	-
P41145	DB00320	-	-
P41145	DB00758	-	-
P41145	DB00454	-	-
P41145	DB00327	-	-
P41145	DB00324	-	-
P41145	DB00457	-	-
P41145	DB04571	-	-
P41145	DB00859	-	-
P41145	DB00854	-	-
P41145	DB00857	-	-
P41145	DB00850	-	-
P41145	DB00851	-	-
P41145	DB00836	-	-
P41145	DB00428	-	-
P41145	DB00834	-	-
P41145	DB00783	-	-
P41145	DB00784	-	-
P41145	DB00939	-	-
P41145	DB00831	-	-
P41145	DB00393	-	-
P41145	DB00789	-	-
P41145	DB00935	-	-
P41145	DB00390	-	-
P41145	DB00424	-	-
P41145	DB00394	-	-
P41145	DB00547	-	-
P41145	DB00544	-	-
P41145	DB00542	-	-
P41145	DB00543	-	-
P41145	DB00540	-	-
P41145	DB01018	-	-
P41145	DB01016	-	-
P41145	DB01015	-	-
P41145	DB01014	-	-
P41145	DB01011	-	-
P41145	DB00549	-	-
P41145	DB00233	-	-
P41145	DB00495	-	-
P41145	DB00490	-	-
P41145	DB00493	-	-
P41145	DB08826	-	-
P41145	DB00498	-	-
P41145	DB00499	-	-
P41145	DB00321	-	-
P41145	DB00945	-	-
P41145	DB00734	-	-
P41145	DB00731	-	-
P41145	DB00309	-	-
P41145	DB00733	-	-
P41145	DB00305	-	-
P41145	DB00738	-	-
P41145	DB00302	-	-
P41145	DB01606	-	-
P41145	DB01167	-	-
P41145	DB01166	-	-
P41145	DB01165	-	-
P41145	DB01162	-	-
P41145	DB00426	-	-
P41145	DB01168	-	-
P41145	DB01287	-	-
P41145	DB06697	-	-
P41145	DB01068	-	-
P41145	DB01069	-	-
P41145	DB00649	-	-
P41145	DB00648	-	-
P41145	DB00163	-	-
P41145	DB01062	-	-
P41145	DB01060	-	-
P41145	DB01061	-	-
P41145	DB00641	-	-
P41145	DB01067	-	-
P41145	DB00643	-	-
P41145	DB01065	-	-
P41145	DB01357	-	-
P41145	DB00749	-	-
P41145	DB00298	-	-
P41145	DB00744	-	-
P41145	DB00297	-	-
P41145	DB00295	-	-
P41145	DB00740	-	-
P41145	DB00741	-	-
P41145	DB00742	-	-
P41145	DB00291	-	-
P41145	DB00465	-	-
P41145	DB00450	-	-
P41145	DB00467	-	-
P41145	DB00461	-	-
P41145	DB00462	-	-
P41145	DB00469	-	-
P41145	DB00452	-	-
P41145	DB00196	-	-
P41145	DB00190	-	-
P41145	DB00193	-	-
P41145	DB00199	-	-
P41145	DB00455	-	-
P41145	DB00861	-	-
P41145	DB00860	-	-
P41145	DB00863	-	-
P41145	DB00325	-	-
P41145	DB00864	-	-
P41145	DB01113	-	-
P41145	DB01110	-	-
P41145	DB01114	-	-
P41145	DB01115	-	-
P41145	DB00177	-	-
P41145	DB01118	-	-
P41145	DB01119	-	-
P41145	DB00175	-	-
P41145	DB00263	-	-
P41145	DB00262	-	-
P41145	DB00266	-	-
P41145	DB00265	-	-
P41145	DB00264	-	-
P41145	DB00342	-	-
P41145	DB00343	-	-
P41145	DB00347	-	-
P41145	DB00423	-	-
P41145	DB00635	-	-
P41145	DB00636	-	-
P41145	DB00637	-	-
P41145	DB00630	-	-
P41145	DB01233	-	-
P41145	DB01232	-	-
P41145	DB01231	-	-
P41145	DB01235	-	-
P41145	DB01234	-	-
P41145	DB00104	-	-
P41145	DB00518	-	-
P41145	DB00904	-	-
P41145	DB01047	-	-
P41145	DB00903	-	-
P41145	DB00513	-	-
P41145	DB00512	-	-
P41145	DB00515	-	-
P41145	DB00514	-	-
P41145	DB01026	-	-
P41145	DB00688	-	-
P41145	DB00122	-	-
P41145	DB01023	-	-
P41145	DB00126	-	-
P41145	DB01021	-	-
P41145	DB00681	-	-
P41145	DB00682	-	-
P41145	DB01435	-	-
P41145	DB00684	-	-
P41145	DB01436	-	-
P41145	DB00999	-	-
P41145	DB00995	-	-
P41145	DB00994	-	-
P41145	DB00997	-	-
P41145	DB00996	-	-
P41145	DB00991	-	-
P41145	DB04552	-	-
P41145	DB04573	-	-
P41145	DB00780	-	-
P41145	DB01095	-	-
P41145	DB01094	-	-
P41145	DB01092	-	-
P41145	DB01091	-	-
P41145	DB00656	-	-
P41145	DB00655	-	-
P41145	DB00652	-	-
P41145	DB01099	-	-
P41145	DB00651	-	-
P41145	DB01253	-	-
P41145	DB00166	-	-
P41145	DB00788	-	-
P41145	DB00420	-	-
P41145	DB01380	-	-
P41145	DB00391	-	-
P41145	DB00928	-	-
P41145	DB00841	-	-
P41145	DB00934	-	-
P41145	DB00381	-	-
P41145	DB00382	-	-
P41145	DB00844	-	-
P41145	DB00920	-	-
P41145	DB00921	-	-
P41145	DB00848	-	-
P41145	DB00389	-	-
P41145	DB00434	-	-
P41145	DB00396	-	-
P41145	DB01008	-	-
P41145	DB01009	-	-
P41145	DB00531	-	-
P41145	DB00537	-	-
P41145	DB01001	-	-
P41145	DB01002	-	-
P41145	DB01003	-	-
P41145	DB01005	-	-
P41145	DB01006	-	-
P41145	DB00541	-	-
P41145	DB00279	-	-
P41145	DB00274	-	-
P41145	DB00418	-	-
P41145	DB00277	-	-
P41145	DB00271	-	-
P41145	DB00376	-	-
P41145	DB00373	-	-
P41145	DB06800	-	-
P41145	DB00379	-	-
P41145	DB06150	-	-
P41145	DB01171	-	-
P41145	DB01172	-	-
P41145	DB01173	-	-
P41145	DB01174	-	-
P41145	DB01175	-	-
P41145	DB01176	-	-
P41145	DB01177	-	-
P41145	DB01179	-	-
P41145	DB00970	-	-
P41145	DB00977	-	-
P41145	DB00975	-	-
P41145	DB00502	-	-
P41145	DB00503	-	-
P41145	DB00500	-	-
P41145	DB00978	-	-
P41145	DB01581	-	-
P41145	DB01582	-	-
P41145	DB01053	-	-
P41145	DB00698	-	-
P41145	DB01050	-	-
P41145	DB01056	-	-
P41145	DB01055	-	-
P41145	DB01054	-	-
P41145	DB00692	-	-
P41145	DB01351	-	-
P41145	DB01059	-	-
P41145	DB01058	-	-
P41145	DB01426	-	-
P41145	DB01427	-	-
P41145	DB00694	-	-
P41145	DB00695	-	-
P41145	DB00987	-	-
P41145	DB00982	-	-
P41145	DB00981	-	-
P41145	DB00591	-	-
P41145	DB00590	-	-
P41145	DB00593	-	-
P41145	DB00595	-	-
P41145	DB00598	-	-
P41145	DB00778	-	-
P41145	DB00809	-	-
P41145	DB00808	-	-
P41145	DB00807	-	-
P41145	DB00806	-	-
P41145	DB00773	-	-
P41145	DB00804	-	-
P41145	DB00776	-	-
P41145	DB00477	-	-
P41145	DB00472	-	-
P41145	DB00471	-	-
P41145	DB00577	-	-
P41145	DB00576	-	-
P41145	DB00575	-	-
P41145	DB00573	-	-
P41145	DB00572	-	-
P41145	DB00571	-	-
P41145	DB00479	-	-
P41145	DB00186	-	-
P41145	DB00187	-	-
P41145	DB00184	-	-
P41145	DB00180	-	-
P41145	DB00181	-	-
P41145	DB00871	-	-
P41145	DB00877	-	-
P41145	DB00874	-	-
P41145	DB01128	-	-
P41145	DB01121	-	-
P41145	DB01120	-	-
P41145	DB01127	-	-
P41145	DB01125	-	-
P41145	DB00330	-	-
P41145	DB00445	-	-
P41145	DB00238	-	-
P41145	DB00239	-	-
P41145	DB00443	-	-
P41145	DB00145	-	-
P41145	DB00235	-	-
P41145	DB00600	-	-
P41145	DB00602	-	-
P41145	DB00604	-	-
P41145	DB01224	-	-
P41145	DB01221	-	-
P41145	DB01222	-	-
P41145	DB01223	-	-
P41145	DB00898	-	-
P41145	DB00482	-	-
P41145	DB00936	-	-
P41145	DB00956	-	-
P41145	DB01339	-	-
P41145	DB00730	-	-
P41145	DB01148	-	-
P41145	DB01147	-	-
P41145	DB01143	-	-
P41145	DB01142	-	-
P41145	DB01082	-	-
P41145	DB00839	-	-
P41145	DB01086	-	-
P41145	DB01087	-	-
P41145	DB00623	-	-
P41145	DB00620	-	-
P41145	DB00627	-	-
P41145	DB00624	-	-
P41145	DB01242	-	-
P41145	DB01243	-	-
P41145	DB01241	-	-
P41145	DB01248	-	-
P41145	DB01394	-	-
P41145	DB01396	-	-
P41145	DB06148	-	-
P41145	DB00169	-	-
P41145	DB01392	-	-
P41145	DB01393	-	-
P41145	DB06147	-	-
P41145	DB01399	-	-
P41145	DB00818	-	-
P41145	DB00819	-	-
P41145	DB00762	-	-
P41145	DB00763	-	-
P41145	DB00812	-	-
P41145	DB00813	-	-
P41145	DB00814	-	-
P41145	DB00765	-	-
P41145	DB00568	-	-
P41145	DB00401	-	-
P41145	DB00400	-	-
P41145	DB00406	-	-
P41145	DB00404	-	-
P41145	DB00561	-	-
P41145	DB00563	-	-
P41145	DB00564	-	-
P41145	DB04841	-	-
P41145	DB00567	-	-
P41145	DB00759	-	-
P41145	DB00696	-	-
P41145	DB00884	-	-
P41145	DB00968	-	-
P41145	DB00969	-	-
P41145	DB00881	-	-
P41145	DB00967	-	-
P41145	DB00960	-	-
P41145	DB00961	-	-
P41145	DB00889	-	-
P41145	DB00963	-	-
P41145	DB06729	-	-
P41145	DB00249	-	-
P41145	DB00717	-	-
P41145	DB00715	-	-
P41145	DB00242	-	-
P41145	DB00245	-	-
P41145	DB00712	-	-
P41145	DB00247	-	-
P41145	DB00367	-	-
P41145	DB00365	-	-
P41145	DB00363	-	-
P41145	DB00361	-	-
P41145	DB01024	-	-
P41145	DB03166	-	-
P41145	DB00611	-	-
P41145	DB00614	-	-
P41145	DB00615	-	-
P41145	DB01211	-	-
P41145	DB01210	-	-
P41145	DB01213	-	-
P41145	DB00619	-	-
P41145	DB01217	-	-
P41145	DB01216	-	-
P41145	DB06698	-	-
P41145	DB01188	-	-
P41145	DB01627	-	-
P41145	DB01181	-	-
P41145	DB06691	-	-
P41145	DB01183	-	-
P41145	DB01182	-	-
P41145	DB01184	-	-
P41145	DB01186	-	-
P41145	DB00685	-	-
P41145	DB00811	-	-
P41145	DB01029	-	-
P41145	DB00760	-	-
P41145	DB08807	-	-
P41145	DB04838	-	-
P41145	DB01599	-	-
P41145	DB01044	-	-
P41145	DB01045	-	-
P41145	DB01229	-	-
P41145	DB01595	-	-
P41145	DB01041	-	-
P41145	DB01042	-	-
P41145	DB00661	-	-
P41145	DB00669	-	-
P41145	DB00668	-	-
P41145	DB00583	-	-
P41145	DB00586	-	-
P41145	DB00584	-	-
P41145	DB00585	-	-
P41145	DB08797	-	-
P41145	DB00589	-	-
P41145	DB00339	-	-
P41145	DB00724	-	-
P41145	DB00725	-	-
P41145	DB00722	-	-
P41145	DB00721	-	-
P41145	DB00331	-	-
P41145	DB00446	-	-
P41145	DB00333	-	-
P41145	DB00335	-	-
P41145	DB00334	-	-
P41145	DB00441	-	-
P41145	DB01136	-	-
P41145	DB01137	-	-
P41145	DB01132	-	-
P41145	DB01206	-	-
P41145	DB00207	-	-
P41145	DB00206	-	-
P41145	DB00201	-	-
P41145	DB00202	-	-
P41145	DB00208	-	-
P41145	DB06770	-	-
P03372	-	TAXID:65948	Caffeic Acid
P03372	-	TAXID:74900	P-Coumaric Acid
P03372	-	TAXID:74900	Protocatechuic Acid
P03372	-	TAXID:74900	Vanillic Acid
P03372	-	TAXID:74900	Caffeic Acid
P03372	-	TAXID:74900	Kaempferol
P03372	-	TAXID:74900	Quercetin
P03372	-	TAXID:51240	Protocatechuic Acid
P03372	-	TAXID:51240	Caffeic Acid
P03372	-	TAXID:4081	Quercetin
P03372	-	TAXID:4081	Resveratrol
P03372	-	TAXID:4081	Naringenin
P03372	-	TAXID:4442	Resveratrol
P03372	-	TAXID:4442	Kaempferol
P03372	-	TAXID:4442	Caffeic Acid
P03372	-	TAXID:4442	Genistein
P03372	-	TAXID:4442	Daidzein
P03372	-	TAXID:4442	Quercetin
P03372	-	TAXID:4442	Naringenin
P03372	-	TAXID:4577	3-O-Neohesperidoside-3,4,5,7-Tetrahydroxy-3-Methoxyflavone
P03372	-	TAXID:4577	P-Coumaric Acid
P03372	-	TAXID:4577	Kaempferol
P03372	-	TAXID:4577	Caffeic Acid
P03372	-	TAXID:4577	Quercetin
P03372	-	TAXID:4577	Naringenin
P03372	-	TAXID:13894	Vanillic Acid
P03372	-	TAXID:29760	Quercetin
P03372	-	TAXID:29760	Resveratrol
P03372	-	TAXID:29760	Caffeic Acid
P03372	-	TAXID:35925	Quercetin
P03372	-	TAXID:35925	Kaempferol
P03372	-	TAXID:35925	Caffeic Acid
P03372	-	TAXID:114280	P-Coumaric Acid
P03372	-	TAXID:114280	Quercetin
P03372	-	TAXID:114280	Protocatechuic Acid
P03372	-	TAXID:114280	Vanillic Acid
P03372	-	TAXID:114280	Caffeic Acid
P03372	-	TAXID:4513	Caffeic Acid
P03372	-	TAXID:4679	Quercetin
P03372	-	TAXID:4679	Protocatechuic Acid
P03372	-	TAXID:4679	Kaempferol
P03372	-	TAXID:4047	Quercetin
P03372	-	TAXID:4047	Kaempferol
P03372	-	TAXID:4120	Trans-Cinnamic Acid
P03372	-	TAXID:4120	Caffeic Acid
P03372	-	TAXID:3708	Ferulate
P03372	-	TAXID:3708	Kaempferol
P03372	-	TAXID:3708	Caffeic Acid
P03372	-	TAXID:3708	Quercetin
P03372	-	TAXID:3708	Naringenin
P03372	-	TAXID:175228	P-Coumaric Acid
P03372	-	TAXID:175228	Quercetin
P03372	-	TAXID:175228	Resveratrol
P03372	-	TAXID:175228	Protocatechuic Acid
P03372	-	TAXID:4550	P-Coumaric Acid
P03372	-	TAXID:4550	Vanillic Acid
P03372	-	TAXID:89151	Aucubin
P03372	-	TAXID:89151	Catalpol
P03372	-	TAXID:23211	Narcissin
P03372	-	TAXID:32224	P-Coumaric Acid
P03372	-	TAXID:32224	Protocatechuic Acid
P03372	-	TAXID:4146	P-Coumaric Acid
P03372	-	TAXID:4146	Quercetin
P03372	-	TAXID:4146	Vanillic Acid
P03372	-	TAXID:4146	Caffeic Acid
P03372	-	TAXID:4146	Kaempferol
P03372	-	TAXID:4045	Ferulate
P03372	-	TAXID:4045	P-Coumaric Acid
P03372	-	TAXID:4045	Kaempferol
P03372	-	TAXID:4045	Caffeic Acid
P03372	-	TAXID:4045	Trans-Cinnamic Acid
P03372	-	TAXID:4045	Quercetin
P03372	-	TAXID:3469	Quercetin
P03372	-	TAXID:3469	Kaempferol
P03372	-	TAXID:3469	Phenylbutazone
P03372	-	TAXID:3621	P-Coumaric Acid
P03372	-	TAXID:3621	Resveratrol
P03372	-	TAXID:3621	Protocatechuic Acid
P03372	-	TAXID:3621	Vanillic Acid
P03372	-	TAXID:3621	Caffeic Acid
P03372	-	TAXID:29780	Quercetin
P03372	-	TAXID:29780	Protocatechuic Acid
P03372	-	TAXID:29780	Kaempferol
P03372	-	TAXID:29780	Caffeic Acid
P03372	-	TAXID:3649	Daidzein
P03372	-	TAXID:4006	Vanillic Acid
P03372	-	TAXID:48038	Quercetin
P03372	-	TAXID:48038	Kaempferol
P03372	-	TAXID:32247	Quercetin
P03372	-	TAXID:32247	Kaempferol
P03372	-	TAXID:4682	P-Coumaric Acid
P03372	-	TAXID:4682	Quercetin
P03372	-	TAXID:3818	Resveratrol
P03372	-	TAXID:4681	P-Coumaric Acid
P03372	-	TAXID:4681	Protocatechuic Acid
P03372	-	TAXID:4681	Vanillic Acid
P03372	-	TAXID:4681	Caffeic Acid
P03372	-	TAXID:4681	Kaempferol
P03372	-	TAXID:4681	Quercetin
P03372	-	TAXID:4111	P-Coumaric Acid
P03372	-	TAXID:4111	Caffeic Acid
P03372	-	TAXID:49827	Wogonin
P03372	-	TAXID:49827	Caffeic Acid
P03372	-	TAXID:49827	Dihydrotestosterone
P03372	-	TAXID:49827	Naringenin
P03372	-	TAXID:49827	Nordihydroguaiaretic Acid
P03372	-	TAXID:49827	Sophoraflavanone B
P03372	-	TAXID:3747	P-Coumaric Acid
P03372	-	TAXID:3747	Resveratrol
P03372	-	TAXID:3747	Protocatechuic Acid
P03372	-	TAXID:3747	Vanillic Acid
P03372	-	TAXID:3747	Caffeic Acid
P03372	-	TAXID:3747	Kaempferol
P03372	-	TAXID:3747	Quercetin
P03372	-	TAXID:3747	Naringenin
P03372	-	TAXID:3888	Quercetin
P03372	-	TAXID:3888	Naringenin
P03372	-	TAXID:3888	Kaempferol
P03372	-	TAXID:3888	Daidzein
P03372	-	TAXID:4565	Quercetin
P03372	-	TAXID:4565	Resveratrol
P03372	-	TAXID:4565	Vanillic Acid
P03372	-	TAXID:3983	P-Coumaric Acid
P03372	-	TAXID:3983	Protocatechuic Acid
P03372	-	TAXID:3983	Rutoside
P03372	-	TAXID:4236	Quercetin
P03372	-	TAXID:4236	Ethinyl Estradiol
P03372	-	TAXID:171929	Linoleic
P03372	-	TAXID:151069	Protocatechuic Acid
P03372	-	TAXID:151069	Kaempferol
P03372	-	TAXID:50225	Quercetin
P03372	-	TAXID:3885	Quercetin
P03372	-	TAXID:128608	E-Cinnamaldehyde
P03372	-	TAXID:128608	Vanillic Acid
P03372	-	TAXID:128608	Caffeic Acid
P03372	-	TAXID:3617	Quercetin
P03372	-	TAXID:3617	Vanillic Acid
P03372	-	TAXID:3617	Rutoside
P03372	-	TAXID:180772	P-Coumaric Acid
P03372	-	TAXID:180772	Quercetin
P03372	-	TAXID:180772	Resveratrol
P03372	-	TAXID:180772	Kaempferol
P03372	-	TAXID:13427	Quercetin
P03372	-	TAXID:13427	Vanillic Acid
P03372	-	TAXID:13427	Caffeic Acid
P03372	-	TAXID:4072	Quercetin
P03372	-	TAXID:4222	Quercetin
P03372	-	TAXID:4498	P-Coumaric Acid
P03372	-	TAXID:4498	Vanillic Acid
P03372	-	TAXID:4498	Caffeic Acid
P03372	-	TAXID:4530	Quercetin
P03372	-	TAXID:4530	Linoleic
P03372	-	TAXID:4530	Kaempferol
P03372	-	TAXID:4530	Ferulate
P03372	-	TAXID:120290	Quercetin
P03372	-	TAXID:120290	Naringenin
P03372	-	TAXID:120290	Kaempferol
P03372	-	TAXID:120290	Caffeic Acid
P03372	-	TAXID:74645	Quercetin
P03372	-	TAXID:74645	Kaempferol
P03372	-	TAXID:22663	Quercetin
P03372	-	TAXID:3847	Linoleic
P03372	-	TAXID:3847	Kaempferol
P03372	-	TAXID:3847	Genistein
P03372	-	TAXID:3847	Coumestrol
P03372	-	TAXID:3847	Daidzein
P03372	-	TAXID:3847	Quercetin
P03372	-	TAXID:3847	Naringenin
P03372	-	TAXID:3711	Quercetin
P03372	-	TAXID:3711	Resveratrol
P03372	-	TAXID:3711	Linoleic
P03372	-	TAXID:3711	Kaempferol
P03372	-	TAXID:3711	Caffeic Acid
P03372	-	TAXID:3659	Quercetin
P03372	-	TAXID:3659	Kaempferol
P03372	-	TAXID:3712	P-Coumaric Acid
P03372	-	TAXID:3712	Quercetin
P03372	-	TAXID:3712	Kaempferol
P03372	-	TAXID:3712	Caffeic Acid
P03372	-	TAXID:4113	P-Coumaric Acid
P03372	-	TAXID:4113	Protocatechuic Acid
P03372	-	TAXID:4113	Vanillic Acid
P03372	-	TAXID:4113	Caffeic Acid
P03372	-	TAXID:36610	Quercetin
P03372	-	TAXID:36610	Kaempferol
P03372	-	TAXID:3864	Caffeic Acid
P03372	DB01064	-	-
P03372	DB01097	-	-
P03372	DB01095	-	-
P03372	DB00709	-	-
P03372	DB00258	-	-
P03372	DB00259	-	-
P03372	DB00700	-	-
P03372	DB00701	-	-
P03372	DB00251	-	-
P03372	DB00704	-	-
P03372	DB00257	-	-
P03372	DB00254	-	-
P03372	DB00255	-	-
P03372	DB00313	-	-
P03372	DB00310	-	-
P03372	DB00316	-	-
P03372	DB00091	-	-
P03372	DB00319	-	-
P03372	DB00478	-	-
P03372	DB00570	-	-
P03372	DB00969	-	-
P03372	DB01156	-	-
P03372	DB00184	-	-
P03372	DB01151	-	-
P03372	DB00650	-	-
P03372	DB00788	-	-
P03372	DB00227	-	-
P03372	DB00224	-	-
P03372	DB00222	-	-
P03372	DB00220	-	-
P03372	DB00962	-	-
P03372	DB06710	-	-
P03372	DB00179	-	-
P03372	DB00178	-	-
P03372	DB01075	-	-
P03372	DB01074	-	-
P03372	DB01077	-	-
P03372	DB01076	-	-
P03372	DB00252	-	-
P03372	DB00672	-	-
P03372	DB00674	-	-
P03372	DB00675	-	-
P03372	DB00679	-	-
P03372	DB01275	-	-
P03372	DB00795	-	-
P03372	DB00794	-	-
P03372	DB00793	-	-
P03372	DB00823	-	-
P03372	DB00822	-	-
P03372	DB00415	-	-
P03372	DB00829	-	-
P03372	DB00411	-	-
P03372	DB00412	-	-
P03372	DB00798	-	-
P03372	DB00555	-	-
P03372	DB00554	-	-
P03372	DB00550	-	-
P03372	DB00553	-	-
P03372	DB00890	-	-
P03372	DB00489	-	-
P03372	DB00488	-	-
P03372	DB00483	-	-
P03372	DB00482	-	-
P03372	DB00481	-	-
P03372	DB00487	-	-
P03372	DB00484	-	-
P03372	DB01100	-	-
P03372	DB01103	-	-
P03372	DB01105	-	-
P03372	DB01104	-	-
P03372	DB00214	-	-
P03372	DB00215	-	-
P03372	DB00359	-	-
P03372	DB00357	-	-
P03372	DB00356	-	-
P03372	DB00353	-	-
P03372	DB00350	-	-
P03372	DB01208	-	-
P03372	DB01203	-	-
P03372	DB01200	-	-
P03372	DB01201	-	-
P03372	DB01611	-	-
P03372	DB01204	-	-
P03372	DB01205	-	-
P03372	DB01199	-	-
P03372	DB01193	-	-
P03372	DB01190	-	-
P03372	DB01191	-	-
P03372	DB01197	-	-
P03372	DB00361	-	-
P03372	DB01299	-	-
P03372	DB00915	-	-
P03372	DB00928	-	-
P03372	DB00916	-	-
P03372	DB00911	-	-
P03372	DB00529	-	-
P03372	DB00524	-	-
P03372	DB00525	-	-
P03372	DB00919	-	-
P03372	DB00523	-	-
P03372	DB01035	-	-
P03372	DB01037	-	-
P03372	DB01408	-	-
P03372	DB01030	-	-
P03372	DB01032	-	-
P03372	DB01406	-	-
P03372	DB01407	-	-
P03372	DB01400	-	-
P03372	DB00846	-	-
P03372	DB01039	-	-
P03372	DB00951	-	-
P03372	DB00848	-	-
P03372	DB00285	-	-
P03372	DB00284	-	-
P03372	DB00281	-	-
P03372	DB00283	-	-
P03372	DB00389	-	-
P03372	DB00458	-	-
P03372	DB00328	-	-
P03372	DB00750	-	-
P03372	DB00756	-	-
P03372	DB00755	-	-
P03372	DB00322	-	-
P03372	DB00320	-	-
P03372	DB00758	-	-
P03372	DB00455	-	-
P03372	DB00324	-	-
P03372	DB00457	-	-
P03372	DB04571	-	-
P03372	DB00859	-	-
P03372	DB00857	-	-
P03372	DB00850	-	-
P03372	DB00851	-	-
P03372	DB00780	-	-
P03372	DB00428	-	-
P03372	DB00834	-	-
P03372	DB00783	-	-
P03372	DB00784	-	-
P03372	DB00939	-	-
P03372	DB00831	-	-
P03372	DB00421	-	-
P03372	DB00789	-	-
P03372	DB00935	-	-
P03372	DB00390	-	-
P03372	DB00396	-	-
P03372	DB00395	-	-
P03372	DB00394	-	-
P03372	DB00547	-	-
P03372	DB00544	-	-
P03372	DB00542	-	-
P03372	DB00543	-	-
P03372	DB00540	-	-
P03372	DB01018	-	-
P03372	DB01016	-	-
P03372	DB01015	-	-
P03372	DB01014	-	-
P03372	DB01011	-	-
P03372	DB00549	-	-
P03372	DB00233	-	-
P03372	DB00495	-	-
P03372	DB00490	-	-
P03372	DB00493	-	-
P03372	DB08826	-	-
P03372	DB00498	-	-
P03372	DB00499	-	-
P03372	DB00321	-	-
P03372	DB00945	-	-
P03372	DB03255	-	-
P03372	DB00734	-	-
P03372	DB00731	-	-
P03372	DB00309	-	-
P03372	DB00733	-	-
P03372	DB00305	-	-
P03372	DB00738	-	-
P03372	DB00302	-	-
P03372	DB01606	-	-
P03372	DB01167	-	-
P03372	DB01166	-	-
P03372	DB01165	-	-
P03372	DB01162	-	-
P03372	DB00426	-	-
P03372	DB01229	-	-
P03372	DB00959	-	-
P03372	DB01287	-	-
P03372	DB01186	-	-
P03372	DB01068	-	-
P03372	DB01069	-	-
P03372	DB00649	-	-
P03372	DB00648	-	-
P03372	DB00162	-	-
P03372	DB00163	-	-
P03372	DB01062	-	-
P03372	DB01060	-	-
P03372	DB01061	-	-
P03372	DB00641	-	-
P03372	DB01067	-	-
P03372	DB00643	-	-
P03372	DB01065	-	-
P03372	DB01357	-	-
P03372	DB00749	-	-
P03372	DB00298	-	-
P03372	DB00744	-	-
P03372	DB00297	-	-
P03372	DB00740	-	-
P03372	DB00741	-	-
P03372	DB00742	-	-
P03372	DB00291	-	-
P03372	DB00465	-	-
P03372	DB00450	-	-
P03372	DB00467	-	-
P03372	DB00461	-	-
P03372	DB00462	-	-
P03372	DB00469	-	-
P03372	DB00452	-	-
P03372	DB00196	-	-
P03372	DB00190	-	-
P03372	DB00193	-	-
P03372	DB00199	-	-
P03372	DB00861	-	-
P03372	DB00860	-	-
P03372	DB00863	-	-
P03372	DB00325	-	-
P03372	DB00864	-	-
P03372	DB01112	-	-
P03372	DB01113	-	-
P03372	DB01110	-	-
P03372	DB01114	-	-
P03372	DB01115	-	-
P03372	DB00177	-	-
P03372	DB01118	-	-
P03372	DB01119	-	-
P03372	DB00175	-	-
P03372	DB00263	-	-
P03372	DB00262	-	-
P03372	DB00266	-	-
P03372	DB00265	-	-
P03372	DB00264	-	-
P03372	DB00269	-	-
P03372	DB00343	-	-
P03372	DB00347	-	-
P03372	DB00423	-	-
P03372	DB00635	-	-
P03372	DB00636	-	-
P03372	DB00637	-	-
P03372	DB00630	-	-
P03372	DB01233	-	-
P03372	DB01232	-	-
P03372	DB01231	-	-
P03372	DB01235	-	-
P03372	DB01234	-	-
P03372	DB00518	-	-
P03372	DB00904	-	-
P03372	DB01595	-	-
P03372	DB00903	-	-
P03372	DB00513	-	-
P03372	DB00512	-	-
P03372	DB00515	-	-
P03372	DB00514	-	-
P03372	DB01026	-	-
P03372	DB01438	-	-
P03372	DB00122	-	-
P03372	DB01023	-	-
P03372	DB00126	-	-
P03372	DB01021	-	-
P03372	DB00681	-	-
P03372	DB00682	-	-
P03372	DB01435	-	-
P03372	DB00684	-	-
P03372	DB01436	-	-
P03372	DB00999	-	-
P03372	DB00995	-	-
P03372	DB00994	-	-
P03372	DB00997	-	-
P03372	DB00996	-	-
P03372	DB00991	-	-
P03372	DB00437	-	-
P03372	DB04552	-	-
P03372	DB04573	-	-
P03372	DB00836	-	-
P03372	DB00153	-	-
P03372	DB01092	-	-
P03372	DB01091	-	-
P03372	DB00656	-	-
P03372	DB00655	-	-
P03372	DB01099	-	-
P03372	DB00651	-	-
P03372	DB01253	-	-
P03372	DB00166	-	-
P03372	DB00393	-	-
P03372	DB00420	-	-
P03372	DB01380	-	-
P03372	DB00391	-	-
P03372	DB00384	-	-
P03372	DB00841	-	-
P03372	DB00934	-	-
P03372	DB00381	-	-
P03372	DB00382	-	-
P03372	DB00844	-	-
P03372	DB00920	-	-
P03372	DB00433	-	-
P03372	DB00431	-	-
P03372	DB00925	-	-
P03372	DB00434	-	-
P03372	DB00424	-	-
P03372	DB01008	-	-
P03372	DB01009	-	-
P03372	DB00531	-	-
P03372	DB00537	-	-
P03372	DB01001	-	-
P03372	DB01002	-	-
P03372	DB01003	-	-
P03372	DB01005	-	-
P03372	DB01006	-	-
P03372	DB00342	-	-
P03372	DB00541	-	-
P03372	DB00279	-	-
P03372	DB00274	-	-
P03372	DB00418	-	-
P03372	DB00277	-	-
P03372	DB00271	-	-
P03372	DB00376	-	-
P03372	DB00373	-	-
P03372	DB00379	-	-
P03372	DB06150	-	-
P03372	DB01171	-	-
P03372	DB01172	-	-
P03372	DB01173	-	-
P03372	DB01174	-	-
P03372	DB01175	-	-
P03372	DB01176	-	-
P03372	DB01177	-	-
P03372	DB01179	-	-
P03372	DB00970	-	-
P03372	DB00977	-	-
P03372	DB00975	-	-
P03372	DB00502	-	-
P03372	DB00503	-	-
P03372	DB00500	-	-
P03372	DB00978	-	-
P03372	DB01581	-	-
P03372	DB00507	-	-
P03372	DB01582	-	-
P03372	DB01053	-	-
P03372	DB00698	-	-
P03372	DB01050	-	-
P03372	DB01056	-	-
P03372	DB01055	-	-
P03372	DB01054	-	-
P03372	DB00692	-	-
P03372	DB01351	-	-
P03372	DB01420	-	-
P03372	DB01058	-	-
P03372	DB00696	-	-
P03372	DB01427	-	-
P03372	DB00694	-	-
P03372	DB00695	-	-
P03372	DB00987	-	-
P03372	DB00982	-	-
P03372	DB00981	-	-
P03372	DB00591	-	-
P03372	DB00590	-	-
P03372	DB00593	-	-
P03372	DB00595	-	-
P03372	DB00598	-	-
P03372	DB08905	-	-
P03372	DB00779	-	-
P03372	DB00778	-	-
P03372	DB00809	-	-
P03372	DB00808	-	-
P03372	DB00807	-	-
P03372	DB00806	-	-
P03372	DB00773	-	-
P03372	DB00804	-	-
P03372	DB00776	-	-
P03372	DB00477	-	-
P03372	DB00472	-	-
P03372	DB00471	-	-
P03372	DB00577	-	-
P03372	DB00576	-	-
P03372	DB00575	-	-
P03372	DB00573	-	-
P03372	DB00572	-	-
P03372	DB00571	-	-
P03372	DB00479	-	-
P03372	DB00186	-	-
P03372	DB00187	-	-
P03372	DB00169	-	-
P03372	DB00180	-	-
P03372	DB00181	-	-
P03372	DB00878	-	-
P03372	DB00871	-	-
P03372	DB00877	-	-
P03372	DB00874	-	-
P03372	DB01128	-	-
P03372	DB01121	-	-
P03372	DB01120	-	-
P03372	DB01127	-	-
P03372	DB01125	-	-
P03372	DB00330	-	-
P03372	DB00238	-	-
P03372	DB00239	-	-
P03372	DB00335	-	-
P03372	DB01087	-	-
P03372	DB00235	-	-
P03372	DB00600	-	-
P03372	DB00602	-	-
P03372	DB00604	-	-
P03372	DB01224	-	-
P03372	DB01221	-	-
P03372	DB01222	-	-
P03372	DB01223	-	-
P03372	DB00898	-	-
P03372	DB00950	-	-
P03372	DB00936	-	-
P03372	DB01339	-	-
P03372	DB00730	-	-
P03372	DB01148	-	-
P03372	DB01147	-	-
P03372	DB01143	-	-
P03372	DB01142	-	-
P03372	DB01082	-	-
P03372	DB00839	-	-
P03372	DB01086	-	-
P03372	DB00145	-	-
P03372	DB00623	-	-
P03372	DB00620	-	-
P03372	DB00627	-	-
P03372	DB00624	-	-
P03372	DB01242	-	-
P03372	DB01241	-	-
P03372	DB01248	-	-
P03372	DB00120	-	-
P03372	DB01428	-	-
P03372	DB01394	-	-
P03372	DB01396	-	-
P03372	DB06148	-	-
P03372	DB01392	-	-
P03372	DB01393	-	-
P03372	DB06147	-	-
P03372	DB01399	-	-
P03372	DB00818	-	-
P03372	DB00819	-	-
P03372	DB00762	-	-
P03372	DB00763	-	-
P03372	DB00812	-	-
P03372	DB00814	-	-
P03372	DB00765	-	-
P03372	DB00568	-	-
P03372	DB00401	-	-
P03372	DB00400	-	-
P03372	DB00406	-	-
P03372	DB00404	-	-
P03372	DB00561	-	-
P03372	DB00563	-	-
P03372	DB00564	-	-
P03372	DB01059	-	-
P03372	DB04841	-	-
P03372	DB00567	-	-
P03372	DB00759	-	-
P03372	DB01426	-	-
P03372	DB00884	-	-
P03372	DB00968	-	-
P03372	DB00882	-	-
P03372	DB00881	-	-
P03372	DB00967	-	-
P03372	DB00960	-	-
P03372	DB00961	-	-
P03372	DB00889	-	-
P03372	DB00963	-	-
P03372	DB06729	-	-
P03372	DB00249	-	-
P03372	DB00717	-	-
P03372	DB00715	-	-
P03372	DB00242	-	-
P03372	DB00245	-	-
P03372	DB00712	-	-
P03372	DB00247	-	-
P03372	DB00367	-	-
P03372	DB00365	-	-
P03372	DB00363	-	-
P03372	DB00688	-	-
P03372	DB01024	-	-
P03372	DB03166	-	-
P03372	DB00614	-	-
P03372	DB00615	-	-
P03372	DB01211	-	-
P03372	DB01210	-	-
P03372	DB01213	-	-
P03372	DB00619	-	-
P03372	DB01217	-	-
P03372	DB01216	-	-
P03372	DB06698	-	-
P03372	DB01188	-	-
P03372	DB01627	-	-
P03372	DB01181	-	-
P03372	DB06691	-	-
P03372	DB01183	-	-
P03372	DB01182	-	-
P03372	DB01184	-	-
P03372	DB06697	-	-
P03372	DB00685	-	-
P03372	DB00811	-	-
P03372	DB01029	-	-
P03372	DB00760	-	-
P03372	DB08807	-	-
P03372	DB04838	-	-
P03372	DB01599	-	-
P03372	DB01044	-	-
P03372	DB01045	-	-
P03372	DB00104	-	-
P03372	DB01047	-	-
P03372	DB01041	-	-
P03372	DB01042	-	-
P03372	DB00661	-	-
P03372	DB00669	-	-
P03372	DB00668	-	-
P03372	DB00583	-	-
P03372	DB00586	-	-
P03372	DB00584	-	-
P03372	DB00585	-	-
P03372	DB08797	-	-
P03372	DB00589	-	-
P03372	DB00339	-	-
P03372	DB00724	-	-
P03372	DB00725	-	-
P03372	DB00722	-	-
P03372	DB00721	-	-
P03372	DB00331	-	-
P03372	DB00446	-	-
P03372	DB00445	-	-
P03372	DB00443	-	-
P03372	DB00334	-	-
P03372	DB00441	-	-
P03372	DB00336	-	-
P03372	DB01168	-	-
P03372	DB01136	-	-
P03372	DB01137	-	-
P03372	DB01132	-	-
P03372	DB01206	-	-
P03372	DB00205	-	-
P03372	DB00207	-	-
P03372	DB00206	-	-
P03372	DB00201	-	-
P03372	DB00202	-	-
P03372	DB00208	-	-
P03372	DB06770	-	-
P31749	DB02546	-	-
P31749	DB00398	-	-
P31749	DB00317	-	-
P31749	DB06616	-	-
P31749	DB05294	-	-
P31749	DB00227	-	-
P31749	DB00685	-	-
P31749	DB06803	-	-
P31749	DB00619	-	-
P31749	DB06589	-	-
P31749	DB01268	-	-
P31749	DB01254	-	-
P31749	DB00530	-	-
P31749	DB01030	-	-
P31749	DB04868	-	-
P31749	DB01259	-	-
P31749	DB00877	-	-
P31749	DB08877	-	-
P41143	-	TAXID:4681	Hyperin
P41143	-	TAXID:4513	(+)-Catechin
P41143	-	TAXID:65948	Apigenin
P41143	-	TAXID:74900	Hyperin
P41143	-	TAXID:49827	Naringenin
P41143	-	TAXID:58860	(+)-Catechin
P41143	-	TAXID:4081	Naringenin
P41143	-	TAXID:4442	(-)-Epigallocatechin
P41143	-	TAXID:4442	Hesperetin
P41143	-	TAXID:4442	(+)-Catechin
P41143	-	TAXID:4442	Apigenin
P41143	-	TAXID:4442	Daidzein
P41143	-	TAXID:4442	Epicatechin Gallate
P41143	-	TAXID:4442	Naringenin
P41143	-	TAXID:4577	Naringenin
P41143	-	TAXID:32224	(+)-Catechin
P41143	-	TAXID:32224	(-)-Epigallocatechin
P41143	-	TAXID:36610	Apigenin
P41143	-	TAXID:36610	Hyperin
P41143	-	TAXID:151069	(+)-Catechin
P41143	-	TAXID:151069	Taxifolin
P41143	-	TAXID:175228	Taxifolin
P41143	-	TAXID:35925	(+)-Catechin
P41143	-	TAXID:35925	(-)-Epigallocatechin
P41143	-	TAXID:3435	(+)-Catechin
P41143	-	TAXID:94328	Apigenin
P41143	-	TAXID:74645	(+)-Catechin
P41143	-	TAXID:4045	Apigenin
P41143	-	TAXID:4045	Hyperin
P41143	-	TAXID:4679	Taxifolin
P41143	-	TAXID:4072	Apigenin
P41143	-	TAXID:51240	(-)-Epigallocatechin
P41143	-	TAXID:78168	Apigenin
P41143	-	TAXID:41241	(+)-Catechin
P41143	-	TAXID:3641	(+)-Catechin
P41143	-	TAXID:3847	(+)-Catechin
P41143	-	TAXID:3847	Apigenin
P41143	-	TAXID:3847	Naringenin
P41143	-	TAXID:3847	Daidzein
P41143	-	TAXID:89151	Apigenin
P41143	-	TAXID:3760	Hesperetin
P41143	-	TAXID:120290	(+)-Catechin
P41143	-	TAXID:120290	Naringenin
P41143	-	TAXID:120290	Hyperin
P41143	-	TAXID:4146	Apigenin
P41143	-	TAXID:22663	(-)-Epigallocatechin
P41143	-	TAXID:3708	Naringenin
P41143	-	TAXID:3469	Tramadol
P41143	-	TAXID:29760	(+)-Catechin
P41143	-	TAXID:29760	(-)-Epigallocatechin
P41143	-	TAXID:29780	(+)-Catechin
P41143	-	TAXID:29780	(-)-Epigallocatechin
P41143	-	TAXID:3649	Daidzein
P41143	-	TAXID:3617	(+)-Catechin
P41143	-	TAXID:3747	(+)-Catechin
P41143	-	TAXID:3747	Naringenin
P41143	-	TAXID:3747	(-)-Epigallocatechin
P41143	-	TAXID:4113	(+)-Catechin
P41143	-	TAXID:3888	Naringenin
P41143	-	TAXID:3888	Daidzein
P41143	-	TAXID:3864	(+)-Catechin
P41143	DB01064	-	-
P41143	DB01097	-	-
P41143	DB00153	-	-
P41143	DB00709	-	-
P41143	DB00258	-	-
P41143	DB00259	-	-
P41143	DB00252	-	-
P41143	DB00701	-	-
P41143	DB00251	-	-
P41143	DB00704	-	-
P41143	DB00257	-	-
P41143	DB00254	-	-
P41143	DB00255	-	-
P41143	DB00313	-	-
P41143	DB00310	-	-
P41143	DB00316	-	-
P41143	DB00091	-	-
P41143	DB00319	-	-
P41143	DB00318	-	-
P41143	DB00478	-	-
P41143	DB00570	-	-
P41143	DB00882	-	-
P41143	DB06274	-	-
P41143	DB01156	-	-
P41143	DB01151	-	-
P41143	DB00650	-	-
P41143	DB00227	-	-
P41143	DB00224	-	-
P41143	DB00222	-	-
P41143	DB00220	-	-
P41143	DB00962	-	-
P41143	DB06710	-	-
P41143	DB03255	-	-
P41143	DB00178	-	-
P41143	DB01075	-	-
P41143	DB01074	-	-
P41143	DB01077	-	-
P41143	DB01076	-	-
P41143	DB00672	-	-
P41143	DB00674	-	-
P41143	DB00675	-	-
P41143	DB00679	-	-
P41143	DB01275	-	-
P41143	DB01060	-	-
P41143	DB00795	-	-
P41143	DB00794	-	-
P41143	DB00793	-	-
P41143	DB00823	-	-
P41143	DB00822	-	-
P41143	DB00415	-	-
P41143	DB00829	-	-
P41143	DB00411	-	-
P41143	DB00412	-	-
P41143	DB00798	-	-
P41143	DB00555	-	-
P41143	DB00554	-	-
P41143	DB00550	-	-
P41143	DB00553	-	-
P41143	DB00959	-	-
P41143	DB00489	-	-
P41143	DB00488	-	-
P41143	DB00483	-	-
P41143	DB00950	-	-
P41143	DB00481	-	-
P41143	DB00487	-	-
P41143	DB00484	-	-
P41143	DB01100	-	-
P41143	DB01103	-	-
P41143	DB01105	-	-
P41143	DB01104	-	-
P41143	DB00214	-	-
P41143	DB00215	-	-
P41143	DB00359	-	-
P41143	DB00357	-	-
P41143	DB00356	-	-
P41143	DB00353	-	-
P41143	DB00350	-	-
P41143	DB01208	-	-
P41143	DB01203	-	-
P41143	DB01200	-	-
P41143	DB01201	-	-
P41143	DB01611	-	-
P41143	DB01204	-	-
P41143	DB01205	-	-
P41143	DB01199	-	-
P41143	DB01192	-	-
P41143	DB01193	-	-
P41143	DB01190	-	-
P41143	DB01191	-	-
P41143	DB01197	-	-
P41143	DB01299	-	-
P41143	DB00915	-	-
P41143	DB00384	-	-
P41143	DB00916	-	-
P41143	DB00911	-	-
P41143	DB00529	-	-
P41143	DB00524	-	-
P41143	DB00525	-	-
P41143	DB00919	-	-
P41143	DB00523	-	-
P41143	DB01035	-	-
P41143	DB01037	-	-
P41143	DB01408	-	-
P41143	DB01030	-	-
P41143	DB01032	-	-
P41143	DB01406	-	-
P41143	DB01407	-	-
P41143	DB01400	-	-
P41143	DB00846	-	-
P41143	DB01039	-	-
P41143	DB00951	-	-
P41143	DB00433	-	-
P41143	DB00421	-	-
P41143	DB00285	-	-
P41143	DB00284	-	-
P41143	DB00281	-	-
P41143	DB00283	-	-
P41143	DB00389	-	-
P41143	DB00328	-	-
P41143	DB00750	-	-
P41143	DB00756	-	-
P41143	DB00755	-	-
P41143	DB00322	-	-
P41143	DB00320	-	-
P41143	DB00758	-	-
P41143	DB00454	-	-
P41143	DB00327	-	-
P41143	DB00324	-	-
P41143	DB00457	-	-
P41143	DB04571	-	-
P41143	DB00859	-	-
P41143	DB00854	-	-
P41143	DB00857	-	-
P41143	DB00850	-	-
P41143	DB00851	-	-
P41143	DB00836	-	-
P41143	DB00428	-	-
P41143	DB00834	-	-
P41143	DB00783	-	-
P41143	DB00784	-	-
P41143	DB00939	-	-
P41143	DB00831	-	-
P41143	DB00393	-	-
P41143	DB00789	-	-
P41143	DB00935	-	-
P41143	DB00390	-	-
P41143	DB00424	-	-
P41143	DB00394	-	-
P41143	DB00547	-	-
P41143	DB00544	-	-
P41143	DB00542	-	-
P41143	DB00543	-	-
P41143	DB00540	-	-
P41143	DB01018	-	-
P41143	DB01016	-	-
P41143	DB01015	-	-
P41143	DB01014	-	-
P41143	DB01011	-	-
P41143	DB00549	-	-
P41143	DB00233	-	-
P41143	DB00495	-	-
P41143	DB00497	-	-
P41143	DB00490	-	-
P41143	DB00493	-	-
P41143	DB08826	-	-
P41143	DB00498	-	-
P41143	DB00499	-	-
P41143	DB00321	-	-
P41143	DB00945	-	-
P41143	DB00734	-	-
P41143	DB00731	-	-
P41143	DB00309	-	-
P41143	DB00733	-	-
P41143	DB00305	-	-
P41143	DB00738	-	-
P41143	DB00302	-	-
P41143	DB01606	-	-
P41143	DB01167	-	-
P41143	DB01166	-	-
P41143	DB01165	-	-
P41143	DB01162	-	-
P41143	DB00426	-	-
P41143	DB01229	-	-
P41143	DB01287	-	-
P41143	DB06697	-	-
P41143	DB01068	-	-
P41143	DB01069	-	-
P41143	DB00649	-	-
P41143	DB00648	-	-
P41143	DB00163	-	-
P41143	DB01062	-	-
P41143	DB00647	-	-
P41143	DB01061	-	-
P41143	DB00641	-	-
P41143	DB01067	-	-
P41143	DB00643	-	-
P41143	DB01065	-	-
P41143	DB01357	-	-
P41143	DB00749	-	-
P41143	DB00298	-	-
P41143	DB00744	-	-
P41143	DB00297	-	-
P41143	DB00295	-	-
P41143	DB00740	-	-
P41143	DB00741	-	-
P41143	DB00742	-	-
P41143	DB00291	-	-
P41143	DB00465	-	-
P41143	DB00450	-	-
P41143	DB00467	-	-
P41143	DB00461	-	-
P41143	DB00462	-	-
P41143	DB00469	-	-
P41143	DB00452	-	-
P41143	DB00196	-	-
P41143	DB00190	-	-
P41143	DB00193	-	-
P41143	DB00199	-	-
P41143	DB00455	-	-
P41143	DB00861	-	-
P41143	DB00860	-	-
P41143	DB00863	-	-
P41143	DB00325	-	-
P41143	DB00864	-	-
P41143	DB01113	-	-
P41143	DB01110	-	-
P41143	DB01114	-	-
P41143	DB01115	-	-
P41143	DB00177	-	-
P41143	DB01118	-	-
P41143	DB01119	-	-
P41143	DB00175	-	-
P41143	DB00263	-	-
P41143	DB00262	-	-
P41143	DB00266	-	-
P41143	DB00265	-	-
P41143	DB00264	-	-
P41143	DB00342	-	-
P41143	DB00343	-	-
P41143	DB00347	-	-
P41143	DB00423	-	-
P41143	DB00635	-	-
P41143	DB00636	-	-
P41143	DB00637	-	-
P41143	DB00630	-	-
P41143	DB01233	-	-
P41143	DB01232	-	-
P41143	DB01231	-	-
P41143	DB01235	-	-
P41143	DB01234	-	-
P41143	DB00518	-	-
P41143	DB00904	-	-
P41143	DB01047	-	-
P41143	DB00903	-	-
P41143	DB00513	-	-
P41143	DB00512	-	-
P41143	DB00515	-	-
P41143	DB00514	-	-
P41143	DB01026	-	-
P41143	DB00688	-	-
P41143	DB00122	-	-
P41143	DB01023	-	-
P41143	DB00126	-	-
P41143	DB01021	-	-
P41143	DB00681	-	-
P41143	DB00682	-	-
P41143	DB01435	-	-
P41143	DB00684	-	-
P41143	DB01436	-	-
P41143	DB00999	-	-
P41143	DB00995	-	-
P41143	DB00994	-	-
P41143	DB00997	-	-
P41143	DB00996	-	-
P41143	DB00991	-	-
P41143	DB04552	-	-
P41143	DB04573	-	-
P41143	DB00780	-	-
P41143	DB01095	-	-
P41143	DB01094	-	-
P41143	DB01092	-	-
P41143	DB01091	-	-
P41143	DB00656	-	-
P41143	DB00655	-	-
P41143	DB00652	-	-
P41143	DB01099	-	-
P41143	DB00651	-	-
P41143	DB01253	-	-
P41143	DB00166	-	-
P41143	DB00788	-	-
P41143	DB00420	-	-
P41143	DB01380	-	-
P41143	DB00391	-	-
P41143	DB00928	-	-
P41143	DB00841	-	-
P41143	DB00934	-	-
P41143	DB00381	-	-
P41143	DB00382	-	-
P41143	DB00844	-	-
P41143	DB00920	-	-
P41143	DB00921	-	-
P41143	DB00848	-	-
P41143	DB00437	-	-
P41143	DB00434	-	-
P41143	DB00396	-	-
P41143	DB01008	-	-
P41143	DB01009	-	-
P41143	DB00531	-	-
P41143	DB00537	-	-
P41143	DB01001	-	-
P41143	DB01002	-	-
P41143	DB01003	-	-
P41143	DB01005	-	-
P41143	DB01006	-	-
P41143	DB00541	-	-
P41143	DB00279	-	-
P41143	DB00274	-	-
P41143	DB00418	-	-
P41143	DB00277	-	-
P41143	DB00271	-	-
P41143	DB00376	-	-
P41143	DB00373	-	-
P41143	DB06800	-	-
P41143	DB00379	-	-
P41143	DB06150	-	-
P41143	DB01171	-	-
P41143	DB01172	-	-
P41143	DB01173	-	-
P41143	DB01174	-	-
P41143	DB01175	-	-
P41143	DB01176	-	-
P41143	DB01177	-	-
P41143	DB01179	-	-
P41143	DB00970	-	-
P41143	DB00977	-	-
P41143	DB00975	-	-
P41143	DB00502	-	-
P41143	DB00503	-	-
P41143	DB00500	-	-
P41143	DB00978	-	-
P41143	DB01581	-	-
P41143	DB00504	-	-
P41143	DB01582	-	-
P41143	DB01053	-	-
P41143	DB00698	-	-
P41143	DB01050	-	-
P41143	DB01056	-	-
P41143	DB01055	-	-
P41143	DB01054	-	-
P41143	DB00692	-	-
P41143	DB01351	-	-
P41143	DB01059	-	-
P41143	DB01058	-	-
P41143	DB01426	-	-
P41143	DB01427	-	-
P41143	DB00694	-	-
P41143	DB00695	-	-
P41143	DB00987	-	-
P41143	DB00982	-	-
P41143	DB00981	-	-
P41143	DB00591	-	-
P41143	DB00590	-	-
P41143	DB00593	-	-
P41143	DB00595	-	-
P41143	DB00598	-	-
P41143	DB00778	-	-
P41143	DB00809	-	-
P41143	DB00808	-	-
P41143	DB00807	-	-
P41143	DB00806	-	-
P41143	DB00773	-	-
P41143	DB00804	-	-
P41143	DB00802	-	-
P41143	DB00776	-	-
P41143	DB00477	-	-
P41143	DB00472	-	-
P41143	DB00471	-	-
P41143	DB00577	-	-
P41143	DB00576	-	-
P41143	DB00575	-	-
P41143	DB00573	-	-
P41143	DB00572	-	-
P41143	DB00571	-	-
P41143	DB00479	-	-
P41143	DB00186	-	-
P41143	DB00187	-	-
P41143	DB00184	-	-
P41143	DB00180	-	-
P41143	DB00181	-	-
P41143	DB00871	-	-
P41143	DB00877	-	-
P41143	DB00874	-	-
P41143	DB01128	-	-
P41143	DB01121	-	-
P41143	DB01120	-	-
P41143	DB01127	-	-
P41143	DB01125	-	-
P41143	DB00330	-	-
P41143	DB00445	-	-
P41143	DB00238	-	-
P41143	DB00239	-	-
P41143	DB00443	-	-
P41143	DB00145	-	-
P41143	DB00235	-	-
P41143	DB00600	-	-
P41143	DB00602	-	-
P41143	DB00604	-	-
P41143	DB01224	-	-
P41143	DB01221	-	-
P41143	DB01222	-	-
P41143	DB01223	-	-
P41143	DB00898	-	-
P41143	DB00482	-	-
P41143	DB00936	-	-
P41143	DB00956	-	-
P41143	DB01339	-	-
P41143	DB00730	-	-
P41143	DB01148	-	-
P41143	DB01147	-	-
P41143	DB01143	-	-
P41143	DB01142	-	-
P41143	DB01082	-	-
P41143	DB00839	-	-
P41143	DB01086	-	-
P41143	DB01087	-	-
P41143	DB00623	-	-
P41143	DB00620	-	-
P41143	DB00627	-	-
P41143	DB00624	-	-
P41143	DB01242	-	-
P41143	DB01243	-	-
P41143	DB01241	-	-
P41143	DB01248	-	-
P41143	DB01394	-	-
P41143	DB01396	-	-
P41143	DB06148	-	-
P41143	DB00169	-	-
P41143	DB01392	-	-
P41143	DB01393	-	-
P41143	DB06147	-	-
P41143	DB01399	-	-
P41143	DB00818	-	-
P41143	DB00819	-	-
P41143	DB00762	-	-
P41143	DB00763	-	-
P41143	DB00812	-	-
P41143	DB00813	-	-
P41143	DB00814	-	-
P41143	DB00765	-	-
P41143	DB00568	-	-
P41143	DB00401	-	-
P41143	DB00400	-	-
P41143	DB00406	-	-
P41143	DB00404	-	-
P41143	DB00561	-	-
P41143	DB00563	-	-
P41143	DB00564	-	-
P41143	DB04841	-	-
P41143	DB00567	-	-
P41143	DB00759	-	-
P41143	DB00696	-	-
P41143	DB00884	-	-
P41143	DB00968	-	-
P41143	DB00969	-	-
P41143	DB00881	-	-
P41143	DB00967	-	-
P41143	DB00960	-	-
P41143	DB00961	-	-
P41143	DB00889	-	-
P41143	DB00963	-	-
P41143	DB06729	-	-
P41143	DB00249	-	-
P41143	DB00717	-	-
P41143	DB00715	-	-
P41143	DB00242	-	-
P41143	DB00245	-	-
P41143	DB00712	-	-
P41143	DB00247	-	-
P41143	DB00367	-	-
P41143	DB00365	-	-
P41143	DB00363	-	-
P41143	DB00361	-	-
P41143	DB01024	-	-
P41143	DB03166	-	-
P41143	DB00611	-	-
P41143	DB00614	-	-
P41143	DB00615	-	-
P41143	DB01211	-	-
P41143	DB01210	-	-
P41143	DB01213	-	-
P41143	DB00619	-	-
P41143	DB01217	-	-
P41143	DB01216	-	-
P41143	DB06698	-	-
P41143	DB01188	-	-
P41143	DB01627	-	-
P41143	DB01181	-	-
P41143	DB06691	-	-
P41143	DB01183	-	-
P41143	DB01182	-	-
P41143	DB01184	-	-
P41143	DB01186	-	-
P41143	DB00685	-	-
P41143	DB00811	-	-
P41143	DB01029	-	-
P41143	DB00760	-	-
P41143	DB08807	-	-
P41143	DB04838	-	-
P41143	DB01599	-	-
P41143	DB01044	-	-
P41143	DB01045	-	-
P41143	DB00104	-	-
P41143	DB01595	-	-
P41143	DB01041	-	-
P41143	DB01042	-	-
P41143	DB00661	-	-
P41143	DB00669	-	-
P41143	DB00668	-	-
P41143	DB00583	-	-
P41143	DB00586	-	-
P41143	DB00584	-	-
P41143	DB00585	-	-
P41143	DB08797	-	-
P41143	DB00589	-	-
P41143	DB00339	-	-
P41143	DB00724	-	-
P41143	DB00725	-	-
P41143	DB00722	-	-
P41143	DB00721	-	-
P41143	DB00331	-	-
P41143	DB00446	-	-
P41143	DB00333	-	-
P41143	DB00335	-	-
P41143	DB00334	-	-
P41143	DB00441	-	-
P41143	DB01168	-	-
P41143	DB01136	-	-
P41143	DB01137	-	-
P41143	DB01132	-	-
P41143	DB01206	-	-
P41143	DB00207	-	-
P41143	DB00206	-	-
P41143	DB00201	-	-
P41143	DB00202	-	-
P41143	DB00208	-	-
P41143	DB06770	-	-
P28222	-	TAXID:4081	Serotonin
P28222	-	TAXID:4222	Serotonin
P28222	-	TAXID:94328	Serotonin
P28222	-	TAXID:4113	Serotonin
P28222	DB00797	-	-
P28222	DB00398	-	-
P28222	DB00696	-	-
P28222	DB00998	-	-
P28222	DB00315	-	-
P28222	DB06694	-	-
P28222	DB00935	-	-
P28222	DB06144	-	-
P28222	DB00669	-	-
P28222	DB00457	-	-
P28222	DB00692	-	-
P28222	DB00953	-	-
P28222	DB00952	-	-
P28222	DB00960	-	-
P28222	DB00575	-	-
P28222	DB00571	-	-
P28222	DB01162	-	-
P11362	DB00398	-	-
P11362	DB00317	-	-
P11362	DB06616	-	-
P11362	DB01254	-	-
P11362	DB00685	-	-
P11362	DB06803	-	-
P11362	DB00619	-	-
P11362	DB04868	-	-
P11362	DB01268	-	-
P11362	DB05294	-	-
P11362	DB00530	-	-
P11362	DB08877	-	-
P11362	DB00877	-	-
P11362	DB01259	-	-
P11362	DB06589	-	-
[truncated: 6,098 more rows]

## Sheet: Endocrine
Protein	Drug name	Plant source	Plant compound
P04150	-	TAXID:51089	Meso-Dihydroguaiaretic Acid
P04150	-	TAXID:51089	Verrucosin
P04150	-	TAXID:4006	Podophyllotoxin
P04150	DB01097	-	-
P04150	DB01095	-	-
P04150	DB00709	-	-
P04150	DB00258	-	-
P04150	DB00259	-	-
P04150	DB00700	-	-
P04150	DB00701	-	-
P04150	DB00251	-	-
P04150	DB00704	-	-
P04150	DB00257	-	-
P04150	DB00254	-	-
P04150	DB00255	-	-
P04150	DB00313	-	-
P04150	DB00310	-	-
P04150	DB00316	-	-
P04150	DB00091	-	-
P04150	DB00319	-	-
P04150	DB00478	-	-
P04150	DB00570	-	-
P04150	DB00882	-	-
P04150	DB01156	-	-
P04150	DB00184	-	-
P04150	DB01151	-	-
P04150	DB00650	-	-
P04150	DB00227	-	-
P04150	DB00224	-	-
P04150	DB00222	-	-
P04150	DB00220	-	-
P04150	DB00962	-	-
P04150	DB00888	-	-
P04150	DB06710	-	-
P04150	DB03255	-	-
P04150	DB00178	-	-
P04150	DB01075	-	-
P04150	DB01074	-	-
P04150	DB00175	-	-
P04150	DB01076	-	-
P04150	DB00252	-	-
P04150	DB00672	-	-
P04150	DB00674	-	-
P04150	DB00675	-	-
P04150	DB00679	-	-
P04150	DB01275	-	-
P04150	DB02959	-	-
P04150	DB00795	-	-
P04150	DB00794	-	-
P04150	DB00793	-	-
P04150	DB00823	-	-
P04150	DB00822	-	-
P04150	DB00415	-	-
P04150	DB00829	-	-
P04150	DB00411	-	-
P04150	DB00412	-	-
P04150	DB00798	-	-
P04150	DB00555	-	-
P04150	DB00554	-	-
P04150	DB00550	-	-
P04150	DB00553	-	-
P04150	DB00959	-	-
P04150	DB00489	-	-
P04150	DB00488	-	-
P04150	DB00483	-	-
P04150	DB00950	-	-
P04150	DB00481	-	-
P04150	DB00487	-	-
P04150	DB00484	-	-
P04150	DB01103	-	-
P04150	DB01105	-	-
P04150	DB01104	-	-
P04150	DB00214	-	-
P04150	DB00215	-	-
P04150	DB00359	-	-
P04150	DB00357	-	-
P04150	DB00356	-	-
P04150	DB00353	-	-
P04150	DB00350	-	-
P04150	DB01208	-	-
P04150	DB01203	-	-
P04150	DB01200	-	-
P04150	DB01201	-	-
P04150	DB01611	-	-
P04150	DB01204	-	-
P04150	DB01205	-	-
P04150	DB01199	-	-
P04150	DB01193	-	-
P04150	DB01190	-	-
P04150	DB01191	-	-
P04150	DB01197	-	-
P04150	DB00361	-	-
P04150	DB01299	-	-
P04150	DB01030	-	-
P04150	DB00915	-	-
P04150	DB00928	-	-
P04150	DB00916	-	-
P04150	DB00911	-	-
P04150	DB00529	-	-
P04150	DB00524	-	-
P04150	DB00525	-	-
P04150	DB00919	-	-
P04150	DB00523	-	-
P04150	DB01035	-	-
P04150	DB01037	-	-
P04150	DB01408	-	-
P04150	DB00132	-	-
P04150	DB01032	-	-
P04150	DB01406	-	-
P04150	DB01407	-	-
P04150	DB01400	-	-
P04150	DB00846	-	-
P04150	DB01039	-	-
P04150	DB00951	-	-
P04150	DB00285	-	-
P04150	DB00284	-	-
P04150	DB00281	-	-
P04150	DB00283	-	-
P04150	DB00389	-	-
P04150	DB00328	-	-
P04150	DB00750	-	-
P04150	DB00756	-	-
P04150	DB00755	-	-
P04150	DB00322	-	-
P04150	DB00320	-	-
P04150	DB00758	-	-
P04150	DB00455	-	-
P04150	DB00324	-	-
P04150	DB00457	-	-
P04150	DB04571	-	-
P04150	DB00859	-	-
P04150	DB00857	-	-
P04150	DB00850	-	-
P04150	DB00851	-	-
P04150	DB00780	-	-
P04150	DB00428	-	-
P04150	DB00834	-	-
P04150	DB00783	-	-
P04150	DB00784	-	-
P04150	DB00939	-	-
P04150	DB00831	-	-
P04150	DB00421	-	-
P04150	DB00789	-	-
P04150	DB00935	-	-
P04150	DB00390	-	-
P04150	DB00396	-	-
P04150	DB00394	-	-
P04150	DB00547	-	-
P04150	DB00544	-	-
P04150	DB00542	-	-
P04150	DB00543	-	-
P04150	DB00540	-	-
P04150	DB01018	-	-
P04150	DB01016	-	-
P04150	DB01015	-	-
P04150	DB01014	-	-
P04150	DB01011	-	-
P04150	DB00549	-	-
P04150	DB00233	-	-
P04150	DB00495	-	-
P04150	DB00490	-	-
P04150	DB00493	-	-
P04150	DB08826	-	-
P04150	DB00498	-	-
P04150	DB00499	-	-
P04150	DB00321	-	-
P04150	DB00945	-	-
P04150	DB00788	-	-
P04150	DB00734	-	-
P04150	DB00731	-	-
P04150	DB00309	-	-
P04150	DB00733	-	-
P04150	DB00305	-	-
P04150	DB00738	-	-
P04150	DB00302	-	-
P04150	DB01606	-	-
P04150	DB01167	-	-
P04150	DB01166	-	-
P04150	DB01165	-	-
P04150	DB01162	-	-
P04150	DB00426	-	-
P04150	DB01229	-	-
P04150	DB01224	-	-
P04150	DB01287	-	-
P04150	DB01186	-	-
P04150	DB01068	-	-
P04150	DB01069	-	-
P04150	DB00649	-	-
P04150	DB00648	-	-
P04150	DB00162	-	-
P04150	DB00163	-	-
P04150	DB01062	-	-
P04150	DB01060	-	-
P04150	DB01061	-	-
P04150	DB00641	-	-
P04150	DB01067	-	-
P04150	DB01064	-	-
P04150	DB01065	-	-
P04150	DB01357	-	-
P04150	DB00839	-	-
P04150	DB00749	-	-
P04150	DB00298	-	-
P04150	DB00744	-	-
P04150	DB00297	-	-
P04150	DB00740	-	-
P04150	DB00741	-	-
P04150	DB00742	-	-
P04150	DB00291	-	-
P04150	DB00465	-	-
P04150	DB00450	-	-
P04150	DB00467	-	-
P04150	DB00461	-	-
P04150	DB00462	-	-
P04150	DB00469	-	-
P04150	DB00452	-	-
P04150	DB00196	-	-
P04150	DB00190	-	-
P04150	DB00193	-	-
P04150	DB00199	-	-
P04150	DB00861	-	-
P04150	DB00860	-	-
P04150	DB00863	-	-
P04150	DB00325	-	-
P04150	DB00864	-	-
P04150	DB01113	-	-
P04150	DB01110	-	-
P04150	DB01114	-	-
P04150	DB01115	-	-
P04150	DB00177	-	-
P04150	DB01118	-	-
P04150	DB01119	-	-
P04150	DB01077	-	-
P04150	DB00263	-	-
P04150	DB00262	-	-
P04150	DB00266	-	-
P04150	DB00265	-	-
P04150	DB00264	-	-
P04150	DB00342	-	-
P04150	DB00343	-	-
P04150	DB00347	-	-
P04150	DB00423	-	-
P04150	DB00635	-	-
P04150	DB00636	-	-
P04150	DB00637	-	-
P04150	DB00630	-	-
P04150	DB01233	-	-
P04150	DB01232	-	-
P04150	DB01231	-	-
P04150	DB01235	-	-
P04150	DB01234	-	-
P04150	DB00518	-	-
P04150	DB00904	-	-
P04150	DB01595	-	-
P04150	DB00903	-	-
P04150	DB00513	-	-
P04150	DB00512	-	-
P04150	DB00515	-	-
P04150	DB00514	-	-
P04150	DB00120	-	-
P04150	DB01438	-	-
P04150	DB00122	-	-
P04150	DB01023	-	-
P04150	DB00126	-	-
P04150	DB01021	-	-
P04150	DB00681	-	-
P04150	DB00682	-	-
P04150	DB01435	-	-
P04150	DB00684	-	-
P04150	DB01436	-	-
P04150	DB00999	-	-
P04150	DB00995	-	-
P04150	DB00994	-	-
P04150	DB00997	-	-
P04150	DB00996	-	-
P04150	DB00991	-	-
P04150	DB00437	-	-
P04150	DB04552	-	-
P04150	DB04573	-	-
P04150	DB00836	-	-
P04150	DB00153	-	-
P04150	DB01092	-	-
P04150	DB01091	-	-
P04150	DB00656	-	-
P04150	DB00655	-	-
P04150	DB01099	-	-
P04150	DB00651	-	-
P04150	DB01253	-	-
P04150	DB00166	-	-
P04150	DB00393	-	-
P04150	DB00420	-	-
P04150	DB01380	-	-
P04150	DB00391	-	-
P04150	DB00384	-	-
P04150	DB00841	-	-
P04150	DB00934	-	-
P04150	DB00381	-	-
P04150	DB00382	-	-
P04150	DB00844	-	-
P04150	DB00920	-	-
P04150	DB00433	-	-
P04150	DB00848	-	-
P04150	DB00925	-	-
P04150	DB00434	-	-
P04150	DB00424	-	-
P04150	DB01008	-	-
P04150	DB01009	-	-
P04150	DB00531	-	-
P04150	DB00537	-	-
P04150	DB01001	-	-
P04150	DB01002	-	-
P04150	DB01003	-	-
P04150	DB01005	-	-
P04150	DB01006	-	-
P04150	DB00541	-	-
P04150	DB00279	-	-
P04150	DB00274	-	-
P04150	DB00418	-	-
P04150	DB00277	-	-
P04150	DB00271	-	-
P04150	DB00376	-	-
P04150	DB00373	-	-
P04150	DB06803	-	-
P04150	DB00379	-	-
P04150	DB06151	-	-
P04150	DB06150	-	-
P04150	DB01171	-	-
P04150	DB01172	-	-
P04150	DB01173	-	-
P04150	DB01174	-	-
P04150	DB01175	-	-
P04150	DB01176	-	-
P04150	DB01177	-	-
P04150	DB01179	-	-
P04150	DB06637	-	-
P04150	DB00643	-	-
P04150	DB00970	-	-
P04150	DB00977	-	-
P04150	DB00975	-	-
P04150	DB00502	-	-
P04150	DB00503	-	-
P04150	DB00500	-	-
P04150	DB01586	-	-
P04150	DB01581	-	-
P04150	DB00507	-	-
P04150	DB01582	-	-
P04150	DB01053	-	-
P04150	DB00698	-	-
P04150	DB01050	-	-
P04150	DB01056	-	-
P04150	DB01055	-	-
P04150	DB01054	-	-
P04150	DB00692	-	-
P04150	DB01351	-	-
P04150	DB01420	-	-
P04150	DB01058	-	-
P04150	DB01426	-	-
P04150	DB01427	-	-
P04150	DB00694	-	-
P04150	DB00695	-	-
P04150	DB00987	-	-
P04150	DB00982	-	-
P04150	DB00981	-	-
P04150	DB00591	-	-
P04150	DB00590	-	-
P04150	DB00593	-	-
P04150	DB00595	-	-
P04150	DB08906	-	-
P04150	DB00598	-	-
P04150	DB00778	-	-
P04150	DB00809	-	-
P04150	DB00808	-	-
P04150	DB00807	-	-
P04150	DB00806	-	-
P04150	DB00773	-	-
P04150	DB00804	-	-
P04150	DB00776	-	-
P04150	DB00477	-	-
P04150	DB00472	-	-
P04150	DB00471	-	-
P04150	DB00577	-	-
P04150	DB00576	-	-
P04150	DB00575	-	-
P04150	DB00573	-	-
P04150	DB00572	-	-
P04150	DB00571	-	-
P04150	DB00479	-	-
P04150	DB00186	-	-
P04150	DB00187	-	-
P04150	DB00169	-	-
P04150	DB00180	-	-
P04150	DB00181	-	-
P04150	DB00878	-	-
P04150	DB00871	-	-
P04150	DB00877	-	-
P04150	DB00874	-	-
P04150	DB01128	-	-
P04150	DB01121	-	-
P04150	DB01120	-	-
P04150	DB01127	-	-
P04150	DB01125	-	-
P04150	DB01124	-	-
P04150	DB00330	-	-
P04150	DB00238	-	-
P04150	DB00239	-	-
P04150	DB00335	-	-
P04150	DB01087	-	-
P04150	DB00235	-	-
P04150	DB00600	-	-
P04150	DB00602	-	-
P04150	DB00604	-	-
P04150	DB00609	-	-
P04150	DB01221	-	-
P04150	DB01222	-	-
P04150	DB01223	-	-
P04150	DB00898	-	-
P04150	DB00482	-	-
P04150	DB00936	-	-
P04150	DB01339	-	-
P04150	DB00730	-	-
P04150	DB01026	-	-
P04150	DB01148	-	-
P04150	DB01147	-	-
P04150	DB01143	-	-
P04150	DB01142	-	-
P04150	DB01082	-	-
P04150	DB00978	-	-
P04150	DB01086	-	-
P04150	DB00145	-	-
P04150	DB00623	-	-
P04150	DB00620	-	-
P04150	DB00627	-	-
P04150	DB00624	-	-
P04150	DB01242	-	-
P04150	DB01241	-	-
P04150	DB01248	-	-
P04150	DB01394	-	-
P04150	DB01396	-	-
P04150	DB06148	-	-
P04150	DB01392	-	-
P04150	DB01393	-	-
P04150	DB06147	-	-
P04150	DB01399	-	-
P04150	DB00818	-	-
P04150	DB00819	-	-
P04150	DB00762	-	-
P04150	DB00763	-	-
P04150	DB00812	-	-
P04150	DB00814	-	-
P04150	DB00765	-	-
P04150	DB00568	-	-
P04150	DB00401	-	-
P04150	DB00400	-	-
P04150	DB00406	-	-
P04150	DB00404	-	-
P04150	DB00561	-	-
P04150	DB00563	-	-
P04150	DB00564	-	-
P04150	DB01059	-	-
P04150	DB04841	-	-
P04150	DB00567	-	-
P04150	DB00759	-	-
P04150	DB00696	-	-
P04150	DB00884	-	-
P04150	DB00968	-	-
P04150	DB00969	-	-
P04150	DB00881	-	-
P04150	DB00967	-	-
P04150	DB00960	-	-
P04150	DB00961	-	-
P04150	DB00889	-	-
P04150	DB00963	-	-
P04150	DB06729	-	-
P04150	DB00249	-	-
P04150	DB00717	-	-
P04150	DB00715	-	-
P04150	DB00242	-	-
P04150	DB00245	-	-
P04150	DB00712	-	-
P04150	DB00247	-	-
P04150	DB00367	-	-
P04150	DB00365	-	-
P04150	DB00363	-	-
P04150	DB00688	-	-
P04150	DB01024	-	-
P04150	DB03166	-	-
P04150	DB00614	-	-
P04150	DB00615	-	-
P04150	DB01211	-	-
P04150	DB01210	-	-
P04150	DB01213	-	-
P04150	DB00619	-	-
P04150	DB01217	-	-
P04150	DB01216	-	-
P04150	DB06698	-	-
P04150	DB01188	-	-
P04150	DB01627	-	-
P04150	DB01181	-	-
P04150	DB06691	-	-
P04150	DB01183	-	-
P04150	DB01182	-	-
P04150	DB01185	-	-
P04150	DB01184	-	-
P04150	DB06697	-	-
P04150	DB00685	-	-
P04150	DB00811	-	-
P04150	DB01029	-	-
P04150	DB00760	-	-
P04150	DB08807	-	-
P04150	DB04838	-	-
P04150	DB01599	-	-
P04150	DB01044	-	-
P04150	DB01045	-	-
P04150	DB00104	-	-
P04150	DB01047	-	-
P04150	DB01041	-	-
P04150	DB01042	-	-
P04150	DB04930	-	-
P04150	DB00661	-	-
P04150	DB00669	-	-
P04150	DB00668	-	-
P04150	DB00583	-	-
P04150	DB00586	-	-
P04150	DB00584	-	-
P04150	DB00585	-	-
P04150	DB08797	-	-
P04150	DB00588	-	-
P04150	DB00589	-	-
P04150	DB00339	-	-
P04150	DB00724	-	-
P04150	DB00725	-	-
P04150	DB00722	-	-
P04150	DB00721	-	-
P04150	DB00331	-	-
P04150	DB00446	-	-
P04150	DB00445	-	-
P04150	DB00443	-	-
P04150	DB00334	-	-
P04150	DB00441	-	-
P04150	DB01168	-	-
P04150	DB01136	-	-
P04150	DB01137	-	-
P04150	DB01132	-	-
P04150	DB01206	-	-
P04150	DB00207	-	-
P04150	DB00206	-	-
P04150	DB00201	-	-
P04150	DB00202	-	-
P04150	DB00208	-	-
P04150	DB06770	-	-
P04150	DB06777	-	-
P10253	-	TAXID:65948	Luteolin
P10253	-	TAXID:65948	Caffeic Acid
P10253	-	TAXID:74900	Quercetin
P10253	-	TAXID:74900	Protocatechuic Acid
P10253	-	TAXID:74900	Spiraeoside
P10253	-	TAXID:74900	Caffeic Acid
P10253	-	TAXID:74900	Hyperin
P10253	-	TAXID:51240	Protocatechuic Acid
P10253	-	TAXID:51240	Caffeic Acid
P10253	-	TAXID:58860	(+)-Catechin
P10253	-	TAXID:4081	Quercetin
P10253	-	TAXID:4081	Phloretin
P10253	-	TAXID:4081	Piceid
P10253	-	TAXID:4081	Resveratrol
P10253	-	TAXID:4081	Kaempferol-3-O-Sophoroside
P10253	-	TAXID:4442	Luteolin
P10253	-	TAXID:4442	Orientin
P10253	-	TAXID:4442	Isovitexin
P10253	-	TAXID:4442	Schaftoside
P10253	-	TAXID:4442	Phloretin
P10253	-	TAXID:4442	Caffeic Acid
P10253	-	TAXID:4442	(+)-Catechin
P10253	-	TAXID:4442	Isoorientin
P10253	-	TAXID:4442	Vicenin-2
P10253	-	TAXID:4442	Quercetin
P10253	-	TAXID:4442	2-Hydroxygenistein
P10253	-	TAXID:4442	Resveratrol
P10253	-	TAXID:4577	Quercetin
P10253	-	TAXID:4577	Caffeic Acid
P10253	-	TAXID:50225	Luteolin
P10253	-	TAXID:50225	Quercetin
P10253	-	TAXID:36610	Schaftoside
P10253	-	TAXID:36610	Quercetin
P10253	-	TAXID:36610	Vicenin-2
P10253	-	TAXID:36610	Luteolin
P10253	-	TAXID:36610	Hyperin
P10253	-	TAXID:114280	Quercetin
P10253	-	TAXID:114280	Protocatechuic Acid
P10253	-	TAXID:114280	Caffeic Acid
P10253	-	TAXID:4513	(+)-Catechin
P10253	-	TAXID:4513	Orientin
P10253	-	TAXID:4513	Isoorientin
P10253	-	TAXID:4513	Isovitexin
P10253	-	TAXID:4513	Caffeic Acid
P10253	-	TAXID:4679	Quercetin
P10253	-	TAXID:4679	Protocatechuic Acid
P10253	-	TAXID:4679	Spiraeoside
P10253	-	TAXID:4679	Taxifolin
P10253	-	TAXID:4047	Luteolin
P10253	-	TAXID:4047	Quercetin
P10253	-	TAXID:4047	Isoorientin
P10253	-	TAXID:4047	Isovitexin
P10253	-	TAXID:4047	Rosmarinic Acid
P10253	-	TAXID:4041	Imperatorin
P10253	-	TAXID:4120	Caffeic Acid
P10253	-	TAXID:13216	Capsaicin
P10253	-	TAXID:13216	Curcumin
P10253	-	TAXID:41241	(+)-Catechin
P10253	-	TAXID:3641	(+)-Catechin
P10253	-	TAXID:175228	Quercetin
P10253	-	TAXID:175228	Resveratrol
P10253	-	TAXID:175228	Protocatechuic Acid
P10253	-	TAXID:175228	Taxifolin
P10253	-	TAXID:89151	Zearalenone
P10253	-	TAXID:3760	9-Amino-1234-Tetrahydroacridine
P10253	-	TAXID:32224	(+)-Catechin
P10253	-	TAXID:32224	Protocatechuic Acid
P10253	-	TAXID:4146	Luteolin
P10253	-	TAXID:4146	Quercetin
P10253	-	TAXID:4146	Caffeic Acid
P10253	-	TAXID:4045	Luteolin
P10253	-	TAXID:4045	Quercetin
P10253	-	TAXID:4045	Nicotinic Acid
P10253	-	TAXID:4045	Caffeic Acid
P10253	-	TAXID:4045	Hyperin
P10253	-	TAXID:3469	Quercetin
P10253	-	TAXID:4530	Quercetin
P10253	-	TAXID:29760	(+)-Catechin
P10253	-	TAXID:29760	Quercetin
P10253	-	TAXID:29760	Resveratrol
P10253	-	TAXID:29760	Caffeic Acid
P10253	-	TAXID:29780	Protocatechuic Acid
P10253	-	TAXID:29780	Caffeic Acid
P10253	-	TAXID:29780	(+)-Catechin
P10253	-	TAXID:29780	Ellagic Acid
P10253	-	TAXID:29780	Quercetin
P10253	-	TAXID:29780	Methyl Gallate
P10253	-	TAXID:3747	Resveratrol
P10253	-	TAXID:3747	Protocatechuic Acid
P10253	-	TAXID:3747	Caffeic Acid
P10253	-	TAXID:3747	(+)-Catechin
P10253	-	TAXID:3747	Nicotinic Acid
P10253	-	TAXID:3747	Ellagic Acid
P10253	-	TAXID:3747	Quercetin
P10253	-	TAXID:3747	Methyl Gallate
P10253	-	TAXID:3617	Orientin
P10253	-	TAXID:3617	Isovitexin
P10253	-	TAXID:3617	Zearalenone
P10253	-	TAXID:3617	Fagomine
P10253	-	TAXID:3617	(+)-Catechin
P10253	-	TAXID:3617	Isoorientin
P10253	-	TAXID:3617	Rutoside
P10253	-	TAXID:3617	Quercetin
P10253	-	TAXID:2711	3,3,4,6,7,8-Hexa-Me Ether,Ac-3,3,4,5,6,7,8-Heptahydroxyflavone
P10253	-	TAXID:3708	Luteolin
P10253	-	TAXID:3708	Quercetin
P10253	-	TAXID:3708	1-Naphthyl Methylcarbamate
P10253	-	TAXID:3708	Caffeic Acid
P10253	-	TAXID:3914	Isovitexin
P10253	-	TAXID:3621	Resveratrol
P10253	-	TAXID:3621	Protocatechuic Acid
P10253	-	TAXID:3621	Caffeic Acid
P10253	-	TAXID:3621	Piceid
P10253	-	TAXID:32247	Ellagic Acid
P10253	-	TAXID:32247	Quercetin
P10253	-	TAXID:4682	Quercetin
P10253	-	TAXID:3818	Resveratrol
P10253	-	TAXID:4681	Quercetin
P10253	-	TAXID:4681	Protocatechuic Acid
P10253	-	TAXID:4681	Spiraeoside
P10253	-	TAXID:4681	Caffeic Acid
P10253	-	TAXID:4681	Hyperin
P10253	-	TAXID:4111	Caffeic Acid
P10253	-	TAXID:49827	Magnolol
P10253	-	TAXID:49827	Caffeic Acid
P10253	-	TAXID:35925	(+)-Catechin
P10253	-	TAXID:35925	Quercetin
P10253	-	TAXID:35925	Caffeic Acid
P10253	-	TAXID:3562	Thapsigargin
P10253	-	TAXID:3888	Quercetin
P10253	-	TAXID:3888	3-O-Sophorotrioside-3,3,4,5,7-Pentahydroxyflavone
P10253	-	TAXID:3888	Nicotinic Acid
P10253	-	TAXID:4565	Quercetin
P10253	-	TAXID:4565	Resveratrol
P10253	-	TAXID:4565	Zearalenone
P10253	-	TAXID:94328	Honokiol
P10253	-	TAXID:94328	Magnolol
P10253	-	TAXID:94328	Curcumin
P10253	-	TAXID:4236	Quercetin
P10253	-	TAXID:151069	Ellagic Acid
P10253	-	TAXID:151069	(+)-Catechin
P10253	-	TAXID:151069	Protocatechuic Acid
P10253	-	TAXID:151069	Taxifolin
P10253	-	TAXID:3435	(+)-Catechin
P10253	-	TAXID:3885	Quercetin
P10253	-	TAXID:3885	2-Hydroxygenistein
P10253	-	TAXID:128608	Caffeic Acid
P10253	-	TAXID:74645	(+)-Catechin
P10253	-	TAXID:74645	Quercetin
P10253	-	TAXID:74645	Methyl Gallate
P10253	-	TAXID:51089	Macelignan
P10253	-	TAXID:4073	Capsaicin
P10253	-	TAXID:4072	Capsaicin
P10253	-	TAXID:4072	Luteolin
P10253	-	TAXID:4072	Magnolol
P10253	-	TAXID:4072	Honokiol
P10253	-	TAXID:4072	Quercetin
P10253	-	TAXID:4072	Haematoxylin
P10253	-	TAXID:4072	Curcumin
P10253	-	TAXID:161934	Silymarin
P10253	-	TAXID:180772	Quercetin
P10253	-	TAXID:180772	Resveratrol
P10253	-	TAXID:13427	Esculetin
P10253	-	TAXID:13427	Quercetin
P10253	-	TAXID:13427	Scopoletin
P10253	-	TAXID:13427	Caffeic Acid
P10253	-	TAXID:78168	Luteolin
P10253	-	TAXID:78168	Vicenin-2
P10253	-	TAXID:78168	Isoorientin
P10253	-	TAXID:78168	Isovitexin
P10253	-	TAXID:4222	Luteolin
P10253	-	TAXID:4222	Quercetin
P10253	-	TAXID:4498	Scopoletin
P10253	-	TAXID:4498	Caffeic Acid
P10253	-	TAXID:48038	Luteolin
P10253	-	TAXID:48038	Isovitexin
P10253	-	TAXID:48038	Rosmarinic Acid
P10253	-	TAXID:48038	Kaempferol-3-O-Rutinoside
P10253	-	TAXID:48038	Isoorientin
P10253	-	TAXID:48038	Columbianetin
P10253	-	TAXID:48038	Imperatorin
P10253	-	TAXID:48038	Quercetin
P10253	-	TAXID:120290	Ellagic Acid
P10253	-	TAXID:120290	(+)-Catechin
P10253	-	TAXID:120290	Quercetin
P10253	-	TAXID:120290	Caffeic Acid
P10253	-	TAXID:120290	Hyperin
P10253	-	TAXID:3983	Esculetin
P10253	-	TAXID:3983	Protocatechuic Acid
P10253	-	TAXID:3983	Esculin
P10253	-	TAXID:3983	Kaempferol-3-O-Rutinoside
P10253	-	TAXID:3983	Rutoside
P10253	-	TAXID:3983	Scopoletin
P10253	-	TAXID:22663	Ellagic Acid
P10253	-	TAXID:22663	Quercetin
P10253	-	TAXID:22663	Punicalin
P10253	-	TAXID:22663	Methyl Gallate
P10253	-	TAXID:3847	(+)-Catechin
P10253	-	TAXID:3847	Quercetin
P10253	-	TAXID:3847	Nicotinic Acid
P10253	-	TAXID:3847	Coumestrol
P10253	-	TAXID:3711	Quercetin
P10253	-	TAXID:3711	Resveratrol
P10253	-	TAXID:3711	Caffeic Acid
P10253	-	TAXID:3659	Quercetin
P10253	-	TAXID:3712	Quercetin
P10253	-	TAXID:3712	Caffeic Acid
P10253	-	TAXID:3712	Kaempferol-3-O-Sophoroside
P10253	-	TAXID:85571	Eriodictyol
P10253	-	TAXID:4113	(+)-Catechin
P10253	-	TAXID:4113	Protocatechuic Acid
P10253	-	TAXID:4113	Caffeic Acid
P10253	-	TAXID:3864	(+)-Catechin
P10253	-	TAXID:3864	Luteolin
P10253	-	TAXID:3864	Caffeic Acid
P10253	DB00780	-	-
P10253	DB00613	-	-
P10253	DB00637	-	-
P10253	DB00975	-	-
P10253	DB00762	-	-
P10253	DB00158	-	-
P10253	DB00746	-	-
P10253	DB00116	-	-
P10253	DB00740	-	-
P10253	DB01136	-	-
P10253	DB00839	-	-
P10253	DB00568	-	-
P10253	DB00170	-	-
P10253	DB01162	-	-
P10253	DB00541	-	-
P10253	DB00324	-	-
P10253	DB01127	-	-
P10253	DB00444	-	-
P10253	DB00334	-	-
P10253	DB00247	-	-
P10253	DB00195	-	-
P10253	DB01238	-	-
P10253	DB04575	-	-
P10253	DB00988	-	-
P10253	DB00934	-	-
P10253	DB00233	-	-
P10253	DB00221	-	-
P10253	DB04842	-	-
P10253	DB00744	-	-
P10253	DB00968	-	-
P10253	DB00491	-	-
P10253	DB01045	-	-
P10253	DB00598	-	-
P10253	DB00457	-	-
P10253	DB00384	-	-
P10253	DB01110	-	-
P10253	DB00527	-	-
P10253	DB00419	-	-
P10253	DB00382	-	-
P10253	DB00808	-	-
P10253	DB00623	-	-
P10253	DB00284	-	-
P10253	DB00773	-	-
P10253	DB01201	-	-
P10253	DB01220	-	-
P10253	DB01064	-	-
P10253	DB00388	-	-
P10253	DB00477	-	-
P10253	DB00737	-	-
P10253	DB01025	-	-
P10253	DB01243	-	-
P10253	DB00661	-	-
P10253	DB00680	-	-
P10253	DB00714	-	-
P10253	DB00684	-	-
P10253	DB04878	-	-
P10253	DB00668	-	-
P10253	DB00627	-	-
P10253	DB00476	-	-
P10253	DB00342	-	-
P10253	DB00590	-	-
P10253	DB00346	-	-
P10253	DB00890	-	-
P10253	DB00750	-	-
P10253	DB00433	-	-
P10253	DB01029	-	-
P10253	DB00281	-	-
P10253	DB04841	-	-
P31749	DB02546	-	-
P31749	DB00398	-	-
P31749	DB00317	-	-
P31749	DB06616	-	-
P31749	DB05294	-	-
P31749	DB00227	-	-
P31749	DB00685	-	-
P31749	DB06803	-	-
P31749	DB00619	-	-
P31749	DB06589	-	-
P31749	DB01268	-	-
P31749	DB01254	-	-
P31749	DB00530	-	-
P31749	DB01030	-	-
P31749	DB04868	-	-
P31749	DB01259	-	-
P31749	DB00877	-	-
P31749	DB08877	-	-
P16473	-	TAXID:3755	Mandelonitrile
P16473	-	TAXID:3755	Retinol
P16473	-	TAXID:58860	(+)-Catechin
P16473	-	TAXID:4081	1-Penten-3-One
P16473	-	TAXID:4081	Petunidin
P16473	-	TAXID:4081	Hexanol
P16473	-	TAXID:4081	Phloretin
P16473	-	TAXID:4081	Serotonin
P16473	-	TAXID:4081	Spermidine
P16473	-	TAXID:4081	Chlorogenic Acid
P16473	-	TAXID:4081	Zeatin
P16473	-	TAXID:4081	Piperonyl Butoxide
P16473	-	TAXID:4081	1-Aminocyclopropane-1-Carboxylate
P16473	-	TAXID:4081	Quercetin
P16473	-	TAXID:4442	Luteolin
P16473	-	TAXID:4442	Guaiacol
P16473	-	TAXID:4442	Methyl Salicylate
P16473	-	TAXID:4442	Genistein
P16473	-	TAXID:4442	Apigenin
P16473	-	TAXID:4442	2-Propenal
P16473	-	TAXID:4442	Phloretin
P16473	-	TAXID:4442	Caffeic Acid
P16473	-	TAXID:4442	(+)-Catechin
P16473	-	TAXID:4442	Chlorogenic Acid
P16473	-	TAXID:4442	Hesperetin
P16473	-	TAXID:4442	Quercetin
P16473	-	TAXID:4577	Myrcene
P16473	-	TAXID:4577	Methyl Salicylate
P16473	-	TAXID:4577	Aminoguanidine
P16473	-	TAXID:4577	Carbonyl Cyanide P-Trifluoromethoxyphenylhydrazone
P16473	-	TAXID:4577	5-Fluorouracil
P16473	-	TAXID:4577	Caffeic Acid
P16473	-	TAXID:4577	Chlorogenic Acid
P16473	-	TAXID:4577	Zeatin
P16473	-	TAXID:4577	Beta-Sitosterol
P16473	-	TAXID:4577	Quercetin
P16473	-	TAXID:4577	Tryptophan
P16473	-	TAXID:3494	Bergapten
P16473	-	TAXID:3494	Xanthotoxin
P16473	-	TAXID:29760	(+)-Catechin
P16473	-	TAXID:29760	Quercetin
P16473	-	TAXID:29760	Caffeic Acid
P16473	-	TAXID:29760	Petunidin
P16473	-	TAXID:29760	Beta-Sitosterol
P16473	-	TAXID:114280	Chlorogenic Acid
P16473	-	TAXID:114280	Caffeic Acid
P16473	-	TAXID:114280	Quercetin
P16473	-	TAXID:4045	Luteolin
P16473	-	TAXID:4045	Fumaric
P16473	-	TAXID:4045	Bergapten
P16473	-	TAXID:4045	Estragole
P16473	-	TAXID:4045	Caffeic Acid
P16473	-	TAXID:4045	Apigenin
P16473	-	TAXID:4045	Nicotinic Acid
P16473	-	TAXID:4045	Xanthotoxin
P16473	-	TAXID:4045	Beta-Sitosterol
P16473	-	TAXID:4045	Quercetin
P16473	-	TAXID:4045	Tryptophan
P16473	-	TAXID:4679	4-O-Methyldopamine
P16473	-	TAXID:4679	Fumaric
P16473	-	TAXID:4679	Beta-Mercaptoethylamine
P16473	-	TAXID:4679	Beta-Sitosterol
P16473	-	TAXID:4679	Quercetin
P16473	-	TAXID:4679	Tryptophan
P16473	-	TAXID:4047	Luteolin
P16473	-	TAXID:4047	Xanthotoxin
P16473	-	TAXID:4047	Beta-Sitosterol
P16473	-	TAXID:4047	Quercetin
P16473	-	TAXID:4047	Alpha-Pinene
P16473	-	TAXID:4047	Trans-Anethole
P16473	-	TAXID:4041	Bergapten
P16473	-	TAXID:4041	Xanthotoxin
P16473	-	TAXID:4120	Sporamin
P16473	-	TAXID:4120	Chlorogenic Acid
P16473	-	TAXID:4120	Diamide
P16473	-	TAXID:4120	Fumaric
P16473	-	TAXID:4120	Caffeic Acid
P16473	-	TAXID:4530	Stearic Acid
P16473	-	TAXID:4530	Aspartic Acid
P16473	-	TAXID:4530	Guaiacol
P16473	-	TAXID:4530	Linoleic
P16473	-	TAXID:4530	Acetaldehyde
P16473	-	TAXID:4530	Vinegar
P16473	-	TAXID:4530	Zeatin
P16473	-	TAXID:4530	Beta-Sitosterol
P16473	-	TAXID:4530	Quercetin
P16473	-	TAXID:4530	Beta-Cyclodextrin
P16473	-	TAXID:4530	Betaine Aldehyde
P16473	-	TAXID:32224	(+)-Catechin
P16473	-	TAXID:32224	Chlorogenic Acid
P16473	-	TAXID:32224	Mandelonitrile
P16473	-	TAXID:89151	Apigenin
P16473	-	TAXID:89151	Vinegar
P16473	-	TAXID:89151	Salsolinol
P16473	-	TAXID:89151	Zearalenone
P16473	-	TAXID:40888	Estragole
P16473	-	TAXID:13731	Guaiacol
P16473	-	TAXID:3469	Sanguinarine
P16473	-	TAXID:3469	Aspartic Acid
P16473	-	TAXID:3469	Acetyl Acetate
P16473	-	TAXID:3469	Beta-Sitosterol
P16473	-	TAXID:3469	Quercetin
P16473	-	TAXID:3469	Papaverine
P16473	-	TAXID:3621	Danthron
P16473	-	TAXID:3621	Caffeic Acid
P16473	-	TAXID:3621	Rhein
P16473	-	TAXID:3621	Chrysophanol
P16473	-	TAXID:3621	Cholestatic
P16473	-	TAXID:3621	Beta-Cyclodextrin
P16473	-	TAXID:3621	Sodium Taurocholate
P16473	-	TAXID:4006	Stearic Acid
P16473	-	TAXID:4006	Podophyllotoxin
P16473	-	TAXID:4006	Beta-Sitosterol
P16473	-	TAXID:4006	1-Penten-3-One
P16473	-	TAXID:4006	Pentanal
P16473	-	TAXID:3914	Beta-Cyclodextrin
P16473	-	TAXID:120290	Caffeic Acid
P16473	-	TAXID:120290	(+)-Catechin
P16473	-	TAXID:120290	Chlorogenic Acid
P16473	-	TAXID:120290	Beta-Sitosterol
P16473	-	TAXID:120290	Quercetin
P16473	-	TAXID:120290	Asiatic Acid
P16473	-	TAXID:157791	1-Aminocyclopropane-1-Carboxylate
P16473	-	TAXID:157791	Nicotine
P16473	-	TAXID:157791	Vinegar
P16473	-	TAXID:157791	Tryptophan
P16473	-	TAXID:4681	Quercetin
P16473	-	TAXID:4681	Hexanol
P16473	-	TAXID:4681	Caffeic Acid
P16473	-	TAXID:4681	Ee-24-Decadienal
P16473	-	TAXID:4681	Pentanal
P16473	-	TAXID:49827	Glycyrrhetic Acid
P16473	-	TAXID:49827	Beta-Sitosterol
P16473	-	TAXID:49827	Caffeic Acid
P16473	-	TAXID:3562	2-Propenal
P16473	-	TAXID:3562	Cis-Abscisic Acid
P16473	-	TAXID:3562	Thapsigargin
P16473	-	TAXID:3562	Tryptophan
P16473	-	TAXID:3888	Alpha-Aminoadipic Acid
P16473	-	TAXID:3888	Nicotinic Acid
P16473	-	TAXID:3888	Zeatin
P16473	-	TAXID:3888	1-Aminocyclopropane-1-Carboxylate
P16473	-	TAXID:3888	Quercetin
P16473	-	TAXID:3888	Tryptophan
P16473	-	TAXID:4565	Zearalenone
P16473	-	TAXID:4565	Guaiacol
P16473	-	TAXID:4565	Chlorogenic Acid
P16473	-	TAXID:4565	Zeatin
P16473	-	TAXID:4565	Quercetin
P16473	-	TAXID:4565	Ethyl Alcohol
P16473	-	TAXID:4072	Luteolin
P16473	-	TAXID:4072	Fumaric
P16473	-	TAXID:4072	Dihydrocapsaicin
P16473	-	TAXID:4072	Apigenin
P16473	-	TAXID:4072	Vinegar
P16473	-	TAXID:4072	Piperonyl Butoxide
P16473	-	TAXID:4072	Quercetin
P16473	-	TAXID:4072	Haematoxylin
P16473	-	TAXID:4072	Curcumin
P16473	-	TAXID:151069	(+)-Catechin
P16473	-	TAXID:151069	L-Allylglycine
P16473	-	TAXID:151069	Acetaldehyde
P16473	-	TAXID:151069	Ethyl Alcohol
P16473	-	TAXID:151069	Hexanol
P16473	-	TAXID:41241	(+)-Catechin
P16473	-	TAXID:3885	Quercetin
P16473	-	TAXID:3885	Allantoin
P16473	-	TAXID:3885	Tryptophan
P16473	-	TAXID:3726	Retinol
P16473	-	TAXID:74645	(+)-Catechin
P16473	-	TAXID:74645	Quercetin
P16473	-	TAXID:161934	3-Methoxytyramine
P16473	-	TAXID:161934	Silymarin
P16473	-	TAXID:180772	Quercetin
P16473	-	TAXID:180772	Petunidin
P16473	-	TAXID:4498	Nicotine
P16473	-	TAXID:4498	Caffeic Acid
P16473	-	TAXID:3847	Bisphenol A Bpa
P16473	-	TAXID:3847	Apigenin
P16473	-	TAXID:3847	Linoleic
P16473	-	TAXID:3847	23-Butanedione
P16473	-	TAXID:3847	(+)-Catechin
P16473	-	TAXID:3847	Genistein
P16473	-	TAXID:3847	Nicotinic Acid
P16473	-	TAXID:3847	Allantoin
P16473	-	TAXID:3847	Quercetin
P16473	-	TAXID:3847	Tryptophan
P16473	-	TAXID:33125	Thalidomide
P16473	-	TAXID:33125	Carbamazepine
P16473	-	TAXID:33125	Alpha-Pinene
P16473	-	TAXID:3627	Chlorogenic Acid
P16473	-	TAXID:3627	Acetaldehyde
P16473	-	TAXID:3627	Beta-Sitosterol
P16473	-	TAXID:3627	Asiatic Acid
P16473	-	TAXID:3711	Stearic Acid
P16473	-	TAXID:3711	Linoleic
P16473	-	TAXID:3711	Caffeic Acid
P16473	-	TAXID:3711	Spermidine
P16473	-	TAXID:3711	Beta-Sitosterol
P16473	-	TAXID:3711	Quercetin
P16473	-	TAXID:3711	Tryptophan
P16473	-	TAXID:3659	Quercetin
P16473	-	TAXID:3712	Quercetin
P16473	-	TAXID:3712	Gramine
P16473	-	TAXID:3712	Retinol
P16473	-	TAXID:3712	Caffeic Acid
P16473	-	TAXID:4113	Serotonin
P16473	-	TAXID:4113	Caffeic Acid
P16473	-	TAXID:4113	(+)-Catechin
P16473	-	TAXID:4113	Chlorogenic Acid
P16473	-	TAXID:4113	Vinegar
P16473	-	TAXID:4113	Zeatin
P16473	-	TAXID:4113	1-Aminocyclopropane-1-Carboxylate
P16473	-	TAXID:4113	Tryptophan
P16473	-	TAXID:85571	34-Dimethoxybenzaldehyde
P16473	-	TAXID:85571	Ee-24-Decadienal
P16473	-	TAXID:4111	Chlorogenic Acid
P16473	-	TAXID:4111	Guaiacol
P16473	-	TAXID:4111	Caffeic Acid
P16473	-	TAXID:4111	Ribavirin
P16473	-	TAXID:65948	Luteolin
P16473	-	TAXID:65948	Apigenin
P16473	-	TAXID:65948	Caffeic Acid
P16473	-	TAXID:74900	Quercetin
P16473	-	TAXID:74900	Dimethyl Disulfide
P16473	-	TAXID:74900	Caffeic Acid
P16473	-	TAXID:51240	Stearic Acid
P16473	-	TAXID:51240	Caffeic Acid
P16473	-	TAXID:4222	Luteolin
P16473	-	TAXID:4222	Quercetin
P16473	-	TAXID:4222	Serotonin
P16473	-	TAXID:4222	Beta-Sitosterol
P16473	-	TAXID:4222	Pentanal
P16473	-	TAXID:36610	Luteolin
P16473	-	TAXID:36610	Chlorogenic Acid
P16473	-	TAXID:36610	Apigenin
P16473	-	TAXID:36610	Quercetin
P16473	-	TAXID:4682	Ninhydrin
P16473	-	TAXID:4682	2-Propen-1-Ol
P16473	-	TAXID:4682	Trifluoperazine
P16473	-	TAXID:4682	Beta-Sitosterol
P16473	-	TAXID:4682	Quercetin
P16473	-	TAXID:4682	Dimethyl Disulfide
P16473	-	TAXID:4682	Tryptophan
P16473	-	TAXID:4182	Beta-Sitosterol
P16473	-	TAXID:4513	(+)-Catechin
P16473	-	TAXID:4513	Aspartic Acid
P16473	-	TAXID:4513	Beta-Sitosterol
P16473	-	TAXID:4513	Caffeic Acid
P16473	-	TAXID:13216	Dextromethorphan
P16473	-	TAXID:13216	Vinegar
P16473	-	TAXID:13216	Nonane
P16473	-	TAXID:13216	Alpha-Pinene
P16473	-	TAXID:13216	Curcumin
P16473	-	TAXID:3708	Luteolin
P16473	-	TAXID:3708	Pentanal
P16473	-	TAXID:3708	2-Propenal
P16473	-	TAXID:3708	Cis-Abscisic Acid
P16473	-	TAXID:3708	Acetaldehyde
P16473	-	TAXID:3708	Caffeic Acid
P16473	-	TAXID:3708	Quercetin
P16473	-	TAXID:3708	Tryptophan
P16473	-	TAXID:175228	Quercetin
P16473	-	TAXID:4550	Vinegar
P16473	-	TAXID:4550	Aminooxyacetate
P16473	-	TAXID:4550	Beta-Sitosterol
P16473	-	TAXID:3635	Guaiacol
P16473	-	TAXID:3760	9-Amino-1234-Tetrahydroacridine
P16473	-	TAXID:3760	Hesperetin
P16473	-	TAXID:3879	Alpha-Aminoadipic Acid
P16473	-	TAXID:3641	(+)-Catechin
P16473	-	TAXID:3641	Salsolinol
P16473	-	TAXID:4146	Luteolin
P16473	-	TAXID:4146	Cinchonine
P16473	-	TAXID:4146	Caffeic Acid
P16473	-	TAXID:4146	Apigenin
P16473	-	TAXID:4146	Ee-24-Decadienal
P16473	-	TAXID:4146	Quercetin
P16473	-	TAXID:29780	Cyclohexane
P16473	-	TAXID:29780	Caffeic Acid
P16473	-	TAXID:29780	(+)-Catechin
P16473	-	TAXID:29780	Zeatin
P16473	-	TAXID:29780	Quercetin
P16473	-	TAXID:29780	Isobutyl Alcohol
P16473	-	TAXID:3649	Bergapten
P16473	-	TAXID:3649	Xanthotoxin
P16473	-	TAXID:3617	Zearalenone
P16473	-	TAXID:3617	23-Butanedione
P16473	-	TAXID:3617	(+)-Catechin
P16473	-	TAXID:3617	Quercetin
P16473	-	TAXID:3617	Tryptophan
P16473	-	TAXID:32247	Quercetin
P16473	-	TAXID:32247	Vinegar
P16473	-	TAXID:32247	Cyclohexane
P16473	-	TAXID:32247	23-Butanedione
P16473	-	TAXID:171929	Stearic Acid
P16473	-	TAXID:171929	Guaiacol
P16473	-	TAXID:171929	Methyl Salicylate
P16473	-	TAXID:171929	Linoleic
P16473	-	TAXID:171929	Ouabain
P16473	-	TAXID:171929	Acetaldehyde
P16473	-	TAXID:171929	Ee-24-Decadienal
P16473	-	TAXID:171929	Beta-Cyclodextrin
P16473	-	TAXID:35925	(+)-Catechin
P16473	-	TAXID:35925	Chlorogenic Acid
P16473	-	TAXID:35925	Vinegar
P16473	-	TAXID:35925	Caffeic Acid
P16473	-	TAXID:35925	Quercetin
P16473	-	TAXID:3747	Benzenemethanol
P16473	-	TAXID:3747	Petunidin
P16473	-	TAXID:3747	2-Butoxyethanol
P16473	-	TAXID:3747	Caffeic Acid
P16473	-	TAXID:3747	(+)-Catechin
P16473	-	TAXID:3747	Vinegar
P16473	-	TAXID:3747	Nicotinic Acid
P16473	-	TAXID:3747	Guaiacol
P16473	-	TAXID:3747	Quercetin
P16473	-	TAXID:51089	CHEBI:2904;CHEBI:55352;CHEMLIST:4248898;CID:2249
P16473	-	TAXID:51089	Alpha-Pinene
P16473	-	TAXID:3983	Acrylonitrile
P16473	-	TAXID:3983	2-Methylpropionitrile
P16473	-	TAXID:4236	4-O-Methyldopamine
P16473	-	TAXID:4236	Hexanol
P16473	-	TAXID:4236	Acetaldehyde
P16473	-	TAXID:4236	Gemfibrozil
P16473	-	TAXID:4236	Vinegar
P16473	-	TAXID:4236	Quercetin
P16473	-	TAXID:3346	Alpha-Pinene
P16473	-	TAXID:55513	Alpha-Pinene
P16473	-	TAXID:128608	Caffeic Acid
P16473	-	TAXID:4233	5-Hydroxymethylfurfural
P16473	-	TAXID:4073	Dihydrocapsaicin
P16473	-	TAXID:50225	Luteolin
P16473	-	TAXID:50225	Chlorogenic Acid
P16473	-	TAXID:50225	Quercetin
P16473	-	TAXID:13427	Chlorogenic Acid
P16473	-	TAXID:13427	Beta-Sitosterol
P16473	-	TAXID:13427	Caffeic Acid
P16473	-	TAXID:13427	Quercetin
P16473	-	TAXID:78168	Luteolin
P16473	-	TAXID:78168	Apigenin
P16473	-	TAXID:78168	Octanoate
P16473	-	TAXID:4202	Amantadine
P16473	-	TAXID:48038	Luteolin
P16473	-	TAXID:48038	Myrcene
P16473	-	TAXID:48038	Trans-Anethole
P16473	-	TAXID:48038	Bergapten
P16473	-	TAXID:48038	Estragole
P16473	-	TAXID:48038	Chlorogenic Acid
P16473	-	TAXID:48038	18-Cineole
P16473	-	TAXID:48038	Xanthotoxin
P16473	-	TAXID:48038	Beta-Sitosterol
P16473	-	TAXID:48038	Quercetin
P16473	-	TAXID:48038	Thujone
P16473	-	TAXID:48038	Retinol
P16473	-	TAXID:48038	Alpha-Pinene
P16473	-	TAXID:94328	5-Hydroxy-7-Methoxyflavone
P16473	-	TAXID:94328	Chlorogenic Acid
P16473	-	TAXID:94328	Carbachol
P16473	-	TAXID:94328	Serotonin
P16473	-	TAXID:94328	Acetaldehyde
P16473	-	TAXID:94328	Estragole
P16473	-	TAXID:94328	Apigenin
P16473	-	TAXID:94328	18-Cineole
P16473	-	TAXID:94328	Xanthotoxin
P16473	-	TAXID:94328	Beta-Sitosterol
P16473	-	TAXID:94328	Curcumin
P16473	-	TAXID:94328	Beta-Cyclodextrin
P16473	-	TAXID:22663	Pyridinium
P16473	-	TAXID:22663	Quercetin
P16473	-	TAXID:22663	Alpha-Pinene
P16473	-	TAXID:22663	Beta-Sitosterol
P16473	-	TAXID:22663	Hexanol
P16473	-	TAXID:3435	(+)-Catechin
P16473	-	TAXID:2711	Alpha-Pinene
P16473	-	TAXID:4039	2,4,5-Tri-Me Ether-2,4,5-Trihydroxybenzaldehyde
P16473	-	TAXID:3864	(+)-Catechin
P16473	-	TAXID:3864	Luteolin
P16473	-	TAXID:3864	Alpha-Aminoadipic Acid
P16473	-	TAXID:3864	Cortisone
P16473	-	TAXID:3864	Caffeic Acid
P16473	DB00780	-	-
P16473	DB00150	-	-
P16473	DB00153	-	-
P16473	DB00783	-	-
P16473	DB00832	-	-
P16473	DB01092	-	-
P16473	DB00938	-	-
P16473	DB00788	-	-
P16473	DB00420	-	-
P16473	DB00935	-	-
P16473	DB00422	-	-
P16473	DB00396	-	-
P16473	DB00427	-	-
P16473	DB01142	-	-
P16473	DB00914	-	-
P16473	DB00258	-	-
P16473	DB01094	-	-
P16473	DB00543	-	-
P16473	DB01019	-	-
P16473	DB01016	-	-
P16473	DB00250	-	-
P16473	DB00251	-	-
P16473	DB00604	-	-
P16473	DB00254	-	-
P16473	DB00255	-	-
P16473	DB00390	-	-
P16473	DB00211	-	-
P16473	DB00316	-	-
P16473	DB00934	-	-
P16473	DB01058	-	-
P16473	DB00831	-	-
P16473	DB01005	-	-
P16473	DB00393	-	-
P16473	DB00694	-	-
P16473	DB01210	-	-
P16473	DB00943	-	-
P16473	DB01380	-	-
P16473	DB00391	-	-
P16473	DB00945	-	-
P16473	DB01080	-	-
P16473	DB00841	-	-
P16473	DB00116	-	-
P16473	DB00847	-	-
P16473	DB00382	-	-
P16473	DB00262	-	-
P16473	DB01156	-	-
P16473	DB00622	-	-
P16473	DB00848	-	-
P16473	DB00388	-	-
P16473	DB00925	-	-
P16473	DB00434	-	-
P16473	DB00507	-	-
P16473	DB01074	-	-
P16473	DB00532	-	-
P16473	DB01244	-	-
P16473	DB01242	-	-
P16473	DB00730	-	-
P16473	DB00733	-	-
P16473	DB01241	-	-
P16473	DB01222	-	-
P16473	DB01001	-	-
P16473	DB01002	-	-
P16473	DB00668	-	-
P16473	DB01203	-	-
P16473	DB01006	-	-
P16473	DB00563	-	-
P16473	DB00227	-	-
P16473	DB00257	-	-
P16473	DB00544	-	-
P16473	DB00221	-	-
P16473	DB01394	-	-
P16473	DB01195	-	-
P16473	DB00259	-	-
P16473	DB00158	-	-
P16473	DB01392	-	-
P16473	DB00915	-	-
P16473	DB00395	-	-
P16473	DB01297	-	-
P16473	DB00818	-	-
P16473	DB00455	-	-
P16473	DB01045	-	-
P16473	DB00540	-	-
P16473	DB00811	-	-
P16473	DB00462	-	-
P16473	DB01075	-	-
P16473	DB00827	-	-
P16473	DB00816	-	-
P16473	DB00545	-	-
P16473	DB01166	-	-
P16473	DB00672	-	-
P16473	DB00400	-	-
P16473	DB01162	-	-
P16473	DB01160	-	-
P16473	DB00679	-	-
P16473	DB00276	-	-
P16473	DB04844	-	-
P16473	DB00564	-	-
P16473	DB01420	-	-
P16473	DB04840	-	-
P16473	DB01182	-	-
P16473	DB00376	-	-
P16473	DB00370	-	-
P16473	DB00433	-	-
P16473	DB01426	-	-
P16473	DB06803	-	-
P16473	DB00379	-	-
P16473	DB00468	-	-
P16473	DB00887	-	-
P16473	DB00800	-	-
P16473	DB00548	-	-
P16473	DB06729	-	-
P16473	DB01090	-	-
P16473	DB06148	-	-
P16473	DB01288	-	-
P16473	DB01186	-	-
P16473	DB00960	-	-
P16473	DB00181	-	-
P16473	DB00888	-	-
P16473	DB00797	-	-
P16473	DB00166	-	-
P16473	DB00794	-	-
P16473	DB00130	-	-
P16473	DB00648	-	-
P16473	DB00162	-	-
P16473	DB00822	-	-
P16473	DB00414	-	-
P16473	DB00641	-	-
P16473	DB00168	-	-
P16473	DB01067	-	-
P16473	DB01064	-	-
P16473	DB00640	-	-
P16473	DB01172	-	-
P16473	DB00550	-	-
P16473	DB00553	-	-
P16473	DB01177	-	-
P16473	DB01178	-	-
P16473	DB01179	-	-
P16473	DB00243	-	-
P16473	DB00245	-	-
P16473	DB00712	-	-
P16473	DB00711	-	-
P16473	DB00726	-	-
P16473	DB00589	-	-
P16473	DB00415	-	-
P16473	DB06288	-	-
P16473	DB06709	-	-
P16473	DB01198	-	-
P16473	DB00368	-	-
P16473	DB00892	-	-
P16473	DB00483	-	-
P16473	DB00482	-	-
P16473	DB00481	-	-
P16473	DB03166	-	-
P16473	DB01100	-	-
P16473	DB01103	-	-
P16473	DB00795	-	-
P16473	DB01105	-	-
P16473	DB00749	-	-
P16473	DB00975	-	-
P16473	DB00615	-	-
P16473	DB00502	-	-
P16473	DB00297	-	-
P16473	DB00747	-	-
P16473	DB00636	-	-
P16473	DB00602	-	-
P16473	DB00291	-	-
P16473	DB01620	-	-
P16473	DB00717	-	-
P16473	DB00698	-	-
P16473	DB01050	-	-
P16473	DB01626	-	-
P16473	DB01054	-	-
P16473	DB00692	-	-
P16473	DB06691	-	-
P16473	DB01059	-	-
P16473	DB01421	-	-
P16473	DB06694	-	-
P16473	DB01184	-	-
P16473	DB01424	-	-
P16473	DB00206	-	-
P16473	DB00279	-	-
P16473	DB00194	-	-
P16473	DB00359	-	-
P16473	DB00358	-	-
P16473	DB00356	-	-
P16473	DB00353	-	-
P16473	DB00983	-	-
P16473	DB00996	-	-
P16473	DB00869	-	-
P16473	DB00593	-	-
P16473	DB00283	-	-
P16473	DB04711	-	-
P16473	DB08905	-	-
P16473	DB01407	-	-
P16473	DB00782	-	-
P16473	DB00866	-	-
P16473	DB01112	-	-
P16473	DB01113	-	-
P16473	DB01117	-	-
P16473	DB01114	-	-
P16473	DB08800	-	-
P16473	DB00770	-	-
P16473	DB01118	-	-
P16473	DB00804	-	-
P16473	DB01041	-	-
P16473	DB01205	-	-
P16473	DB01364	-	-
P16473	DB00665	-	-
P16473	DB01366	-	-
P16473	DB00472	-	-
P16473	DB00661	-	-
P16473	DB00675	-	-
P16473	DB00350	-	-
P16473	DB00863	-	-
P16473	DB00571	-	-
P16473	DB00570	-	-
P16473	DB00263	-	-
P16473	DB00339	-	-
P16473	DB00184	-	-
P16473	DB00260	-	-
P16473	DB01104	-	-
P16473	DB00266	-	-
P16473	DB00671	-	-
P16473	DB00340	-	-
P16473	DB00269	-	-
P16473	DB00343	-	-
P16473	DB00809	-	-
P16473	DB00499	-	-
P16473	DB00878	-	-
P16473	DB00384	-	-
P16473	DB08799	-	-
P16473	DB08797	-	-
P16473	DB00836	-	-
P16473	DB00871	-	-
P16473	DB00406	-	-
P16473	DB00634	-	-
P16473	DB01329	-	-
P16473	DB00917	-	-
P16473	DB00916	-	-
P16473	DB00633	-	-
P16473	DB00721	-	-
P16473	DB01127	-	-
P16473	DB00639	-	-
P16473	DB01124	-	-
P16473	DB01035	-	-
P16473	DB01602	-	-
P16473	DB01037	-	-
P16473	DB00722	-	-
P16473	DB01234	-	-
P16473	DB00446	-	-
P16473	DB01406	-	-
P16473	DB00332	-	-
P16473	DB00443	-	-
P16473	DB00440	-	-
P16473	DB00199	-	-
P16473	DB00495	-	-
P16473	DB01274	-	-
P16473	DB08801	-	-
P16473	DB00335	-	-
P16473	DB00514	-	-
P16473	DB01115	-	-
P16473	DB00235	-	-
P16473	DB01023	-	-
P16473	DB00920	-	-
P16473	DB00436	-	-
P16473	DB01614	-	-
P16473	DB00402	-	-
P16473	DB06707	-	-
P16473	DB00806	-	-
P16473	DB06701	-	-
P16473	DB00815	-	-
P16473	DB01119	-	-
P16473	DB00289	-	-
P16473	DB00903	-	-
P16473	DB01008	-	-
P16473	DB00924	-	-
P16473	DB00280	-	-
P16473	DB00908	-	-
P16473	DB00437	-	-
P16473	DB01026	-	-
P16473	DB01438	-	-
P16473	DB00125	-	-
P16473	DB06637	-	-
P16473	DB00128	-	-
P16473	DB01346	-	-
P16473	DB01039	-	-
P16473	DB00624	-	-
P16473	DB00898	-	-
P16473	DB00457	-	-
P16473	DB00627	-	-
P16473	DB00735	-	-
P16473	DB00207	-	-
P16473	DB04880	-	-
P16473	DB02959	-	-
P16473	DB00734	-	-
P16473	DB00508	-	-
P16473	DB00756	-	-
P16473	DB00991	-	-
P16473	DB00208	-	-
P16473	DB05266	-	-
P16473	DB00363	-	-
P16473	DB01010	-	-
P16473	DB06770	-	-
P16473	DB00850	-	-
P16473	DB00851	-	-
P16473	DB00852	-	-
P16473	DB00411	-	-
P11511	-	TAXID:3627	Ursolic Acid
P11511	-	TAXID:65948	Apigenin
P11511	-	TAXID:74900	Quercetin
P11511	-	TAXID:51240	Stearic Acid
P11511	-	TAXID:51240	Palmitic Acid
P11511	-	TAXID:51240	Oleic Acid
P11511	-	TAXID:4081	Quercetin
P11511	-	TAXID:4081	Naringenin
P11511	-	TAXID:4081	Resveratrol
P11511	-	TAXID:4222	Quercetin
P11511	-	TAXID:4222	Alpha-Linolenic Acid
P11511	-	TAXID:4222	Oleic Acid
P11511	-	TAXID:4577	Quercetin
P11511	-	TAXID:4577	Naringenin
P11511	-	TAXID:36610	Apigenin
P11511	-	TAXID:36610	Quercetin
P11511	-	TAXID:4682	Quercetin
P11511	-	TAXID:4682	Metyrapone
P11511	-	TAXID:3712	Quercetin
P11511	-	TAXID:3712	Metyrapone
P11511	-	TAXID:114280	Quercetin
P11511	-	TAXID:4045	Apigenin
P11511	-	TAXID:4045	Quercetin
P11511	-	TAXID:4679	Quercetin
P11511	-	TAXID:4047	Quercetin
P11511	-	TAXID:4047	Oleic Acid
P11511	-	TAXID:78168	Apigenin
P11511	-	TAXID:4530	Stearic Acid
P11511	-	TAXID:4530	Palmitic Acid
P11511	-	TAXID:4530	Flavanone
P11511	-	TAXID:4530	Linoleic
P11511	-	TAXID:4530	Quercetin
P11511	-	TAXID:3708	Quercetin
P11511	-	TAXID:3708	Naringenin
P11511	-	TAXID:175228	Myricetin
P11511	-	TAXID:175228	Resveratrol
P11511	-	TAXID:175228	Quercetin
P11511	-	TAXID:89151	Apigenin
P11511	-	TAXID:32224	Ursolic Acid
P11511	-	TAXID:4146	Apigenin
P11511	-	TAXID:4146	Quercetin
P11511	-	TAXID:13731	Palmitic Acid
P11511	-	TAXID:3469	Quercetin
P11511	-	TAXID:29760	Quercetin
P11511	-	TAXID:29760	Resveratrol
P11511	-	TAXID:85571	Flavanone
P11511	-	TAXID:3747	Quercetin
P11511	-	TAXID:3747	Naringenin
P11511	-	TAXID:3747	Resveratrol
P11511	-	TAXID:4006	Stearic Acid
P11511	-	TAXID:4006	Alpha-Linolenic Acid
P11511	-	TAXID:4006	Oleic Acid
P11511	-	TAXID:120290	Quercetin
P11511	-	TAXID:120290	Naringenin
P11511	-	TAXID:120290	Ursolic Acid
P11511	-	TAXID:32247	Quercetin
P11511	-	TAXID:157791	Liquiritigenin
P11511	-	TAXID:3818	Resveratrol
P11511	-	TAXID:171929	Stearic Acid
P11511	-	TAXID:171929	Linoleic
P11511	-	TAXID:171929	Oleic Acid
P11511	-	TAXID:35925	Quercetin
P11511	-	TAXID:35925	Ursolic Acid
P11511	-	TAXID:49827	Flavanone
P11511	-	TAXID:49827	Isolicoflavonol
P11511	-	TAXID:49827	Dihydrotestosterone
P11511	-	TAXID:49827	Liquiritigenin
P11511	-	TAXID:49827	Naringenin
P11511	-	TAXID:49827	Nordihydroguaiaretic Acid
P11511	-	TAXID:51089	Myristic Acid
P11511	-	TAXID:3888	Quercetin
P11511	-	TAXID:3888	Naringenin
P11511	-	TAXID:3888	Liquiritigenin
P11511	-	TAXID:3888	Oleic Acid
P11511	-	TAXID:3888	Biochanin A
P11511	-	TAXID:4565	Quercetin
P11511	-	TAXID:4565	Resveratrol
P11511	-	TAXID:94328	Apigenin
P11511	-	TAXID:94328	Oleic Acid
P11511	-	TAXID:94328	Palmitic Acid
P11511	-	TAXID:4236	Quercetin
P11511	-	TAXID:4236	Alpha-Linolenic Acid
P11511	-	TAXID:29780	Quercetin
P11511	-	TAXID:50225	Quercetin
P11511	-	TAXID:3885	Quercetin
P11511	-	TAXID:3621	Resveratrol
P11511	-	TAXID:3847	Flavanone
P11511	-	TAXID:3847	Linoleic
P11511	-	TAXID:3847	Apigenin
P11511	-	TAXID:3847	Liquiritigenin
P11511	-	TAXID:3847	Quercetin
P11511	-	TAXID:3847	Naringenin
P11511	-	TAXID:3847	74-Dihydroxyflavone
P11511	-	TAXID:4681	Quercetin
P11511	-	TAXID:4072	Apigenin
P11511	-	TAXID:4072	Quercetin
P11511	-	TAXID:4072	Myristic Acid
P11511	-	TAXID:180772	Quercetin
P11511	-	TAXID:180772	Resveratrol
P11511	-	TAXID:13427	Palmitic Acid
P11511	-	TAXID:13427	Quercetin
P11511	-	TAXID:4442	Apigenin
P11511	-	TAXID:4442	Naringenin
P11511	-	TAXID:4442	Resveratrol
P11511	-	TAXID:4442	Quercetin
P11511	-	TAXID:48038	Quercetin
P11511	-	TAXID:48038	Oleic Acid
P11511	-	TAXID:74645	Quercetin
P11511	-	TAXID:22663	Myricetin
P11511	-	TAXID:22663	Myristic Acid
P11511	-	TAXID:22663	Quercetin
P11511	-	TAXID:22663	Ursolic Acid
P11511	-	TAXID:3435	Oleic Acid
P11511	-	TAXID:3711	Stearic Acid
P11511	-	TAXID:3711	Oleic Acid
P11511	-	TAXID:3711	Resveratrol
P11511	-	TAXID:3711	Linoleic
P11511	-	TAXID:3711	Alpha-Linolenic Acid
P11511	-	TAXID:3711	Quercetin
P11511	-	TAXID:3711	Palmitic Acid
P11511	-	TAXID:3711	Ursolic Acid
P11511	-	TAXID:3659	Quercetin
P11511	-	TAXID:3617	Palmitic Acid
P11511	-	TAXID:3617	Quercetin
P11511	-	TAXID:2711	Flavanone
P11511	DB01065	-	-
P11511	DB00179	-	-
P11511	DB00357	-	-
P11511	DB00990	-	-
P11511	DB00292	-	-
P11511	DB01110	-	-
P11511	DB01217	-	-
P11511	DB00624	-	-
P11511	DB01026	-	-
P11511	DB00159	-	-
P11511	DB00894	-	-
P11511	DB01006	-	-
P11511	DB06689	-	-
P11511	DB01011	-	-
P11511	DB08905	-	-
P11511	DB00257	-	-
P11511	DB01437	-	-
P11511	DB00132	-	-
P06213	DB00194	-	-
P06213	DB00398	-	-
P06213	DB00317	-	-
P06213	DB06616	-	-
P06213	DB01254	-	-
P06213	DB00685	-	-
P06213	DB00619	-	-
P06213	DB00640	-	-
P06213	DB04868	-	-
P06213	DB01268	-	-
P06213	DB05294	-	-
P06213	DB00530	-	-
P06213	DB08877	-	-
P06213	DB00877	-	-
P06213	DB01259	-	-
P06213	DB06589	-	-
P43220	-	TAXID:65948	Sissotrin
P43220	-	TAXID:3750	Dehydrocurvularin
P43220	-	TAXID:4081	Resveratrol
P43220	-	TAXID:4442	Fisetin
P43220	-	TAXID:4442	Genistein
P43220	-	TAXID:4442	Resveratrol
P43220	-	TAXID:4577	5-Fluorouracil
P43220	-	TAXID:13894	N6-Furfuryladenosine
P43220	-	TAXID:3494	Xanthotoxin
P43220	-	TAXID:29760	Resveratrol
P43220	-	TAXID:157791	Isoliquiritigenin
P43220	-	TAXID:4182	Sesamin
P43220	-	TAXID:85571	Amphotericin B
P43220	-	TAXID:85571	P-Xylidine
P43220	-	TAXID:4047	Xanthotoxin
P43220	-	TAXID:4041	Xanthotoxin
P43220	-	TAXID:4041	Imperatorin
P43220	-	TAXID:13216	Dextromethorphan
P43220	-	TAXID:13216	Paroxetine
P43220	-	TAXID:175228	Resveratrol
P43220	-	TAXID:175228	Flavon-3-Ol
P43220	-	TAXID:23211	Narcissin
P43220	-	TAXID:4146	Cinchonine
P43220	-	TAXID:3818	Resveratrol
P43220	-	TAXID:3621	Aloe-Emodin
P43220	-	TAXID:3621	Resveratrol
P43220	-	TAXID:3621	Desoxyrhaponticin
P43220	-	TAXID:29780	Mangiferin
P43220	-	TAXID:3649	Xanthotoxin
P43220	-	TAXID:120290	Betulinic Acid
P43220	-	TAXID:4682	Trifluoperazine
P43220	-	TAXID:3469	Papaveraldine
P43220	-	TAXID:3469	Tramadol
P43220	-	TAXID:3469	Papaverine
P43220	-	TAXID:3469	Thebaine
P43220	-	TAXID:3469	Narcotine
P43220	-	TAXID:4045	Sphondin
P43220	-	TAXID:4045	Nicotinic Acid
P43220	-	TAXID:4045	Xanthotoxin
P43220	-	TAXID:49827	Isoliquiritigenin
P43220	-	TAXID:49827	1-Methoxyphaseollidin
P43220	-	TAXID:49827	Magnolol
P43220	-	TAXID:49827	Dihydrotestosterone
P43220	-	TAXID:49827	Glabridin
P43220	-	TAXID:49827	Sophoraflavanone B
P43220	-	TAXID:3747	Resveratrol
P43220	-	TAXID:3747	Nicotinic Acid
P43220	-	TAXID:51089	Meso-Dihydroguaiaretic Acid
P43220	-	TAXID:51089	Myristic Acid
P43220	-	TAXID:51089	Dehydrodiisoeugenol
P43220	-	TAXID:51089	CHEBI:2904;CHEBI:55352;CHEMLIST:4248898;CID:2249
P43220	-	TAXID:3888	N-Phenyl-N-2-Pyridylthiourea
P43220	-	TAXID:3888	Nicotinic Acid
P43220	-	TAXID:3888	Biochanin A
P43220	-	TAXID:4565	Resveratrol
P43220	-	TAXID:94328	Magnolol
P43220	-	TAXID:94328	Honokiol
P43220	-	TAXID:94328	Aristolochic Acid
P43220	-	TAXID:94328	Xanthotoxin
P43220	-	TAXID:94328	57-Dimethoxyflavone
P43220	-	TAXID:4236	Goniothalamin
P43220	-	TAXID:4236	Dehydrocurvularin
P43220	-	TAXID:76966	Xanthyletin
P43220	-	TAXID:76966	Nobiletin
P43220	-	TAXID:161934	Ajmalicine
P43220	-	TAXID:180772	Resveratrol
P43220	-	TAXID:13427	Betulinic Acid
P43220	-	TAXID:4072	Honokiol
P43220	-	TAXID:4072	Magnolol
P43220	-	TAXID:4072	Myristic Acid
P43220	-	TAXID:3760	9-Amino-1234-Tetrahydroacridine
P43220	-	TAXID:4530	Betaine Aldehyde
P43220	-	TAXID:48038	Xanthotoxin
P43220	-	TAXID:48038	Imperatorin
P43220	-	TAXID:22663	Betulinic Acid
P43220	-	TAXID:22663	Myristic Acid
P43220	-	TAXID:3847	Genistein
P43220	-	TAXID:3847	Bisphenol A Bpa
P43220	-	TAXID:3847	Isoliquiritigenin
P43220	-	TAXID:3847	Nicotinic Acid
P43220	-	TAXID:3645	Betulinic Acid
P43220	-	TAXID:3711	Resveratrol
P43220	-	TAXID:3617	Indole-3-Ethanol
P43220	-	TAXID:2711	3,3,4,6,7,8-Hexa-Me Ether,Ac-3,3,4,5,6,7,8-Heptahydroxyflavone
P43220	DB01097	-	-
P43220	DB00836	-	-
P43220	DB00834	-	-
P43220	DB00835	-	-
P43220	DB01149	-	-
P43220	DB00831	-	-
P43220	DB00421	-	-
P43220	DB00158	-	-
P43220	DB00756	-	-
P43220	DB00934	-	-
P43220	DB00396	-	-
P43220	DB00394	-	-
P43220	DB00547	-	-
P43220	DB00544	-	-
P43220	DB00398	-	-
P43220	DB01251	-	-
P43220	DB00540	-	-
P43220	DB00251	-	-
P43220	DB00193	-	-
P43220	DB00257	-	-
P43220	DB00255	-	-
P43220	DB00091	-	-
P43220	DB01086	-	-
P43220	DB01239	-	-
P43220	DB00497	-	-
P43220	DB00420	-	-
P43220	DB00935	-	-
P43220	DB00928	-	-
P43220	DB01081	-	-
P43220	DB00518	-	-
P43220	DB00655	-	-
P43220	DB00382	-	-
P43220	DB00432	-	-
P43220	DB00921	-	-
P43220	DB06709	-	-
P43220	DB00924	-	-
P43220	DB01153	-	-
P43220	DB00625	-	-
P43220	DB00624	-	-
P43220	DB01246	-	-
P43220	DB01244	-	-
P43220	DB01242	-	-
P43220	DB01243	-	-
P43220	DB01000	-	-
P43220	DB01142	-	-
P43220	DB00613	-	-
P43220	DB00738	-	-
P43220	DB01359	-	-
P43220	DB00436	-	-
P43220	DB00221	-	-
P43220	DB00220	-	-
P43220	DB06148	-	-
P43220	DB06710	-	-
P43220	DB08811	-	-
P43220	DB01045	-	-
P43220	DB06730	-	-
P43220	DB00762	-	-
P43220	DB00171	-	-
P43220	DB00176	-	-
P43220	DB01600	-	-
P43220	DB00692	-	-
P43220	DB00675	-	-
P43220	DB00405	-	-
P43220	DB01160	-	-
P43220	DB00918	-	-
P43220	DB00679	-	-
P43220	DB00276	-	-
P43220	DB00563	-	-
P43220	DB04842	-	-
P43220	DB04841	-	-
P43220	DB00792	-	-
P43220	DB00370	-	-
P43220	DB06803	-	-
P43220	DB00882	-	-
P43220	DB00827	-	-
P43220	DB06150	-	-
P43220	DB00648	-	-
P43220	DB01062	-	-
P43220	DB06729	-	-
P43220	DB00829	-	-
P43220	DB01064	-	-
P43220	DB00413	-	-
P43220	DB00557	-	-
P43220	DB01173	-	-
P43220	DB00908	-	-
P43220	DB01176	-	-
P43220	DB01177	-	-
P43220	DB00715	-	-
P43220	DB00242	-	-
P43220	DB00245	-	-
P43220	DB00712	-	-
P43220	DB00904	-	-
P43220	DB00458	-	-
P43220	DB00408	-	-
P43220	DB00359	-	-
P43220	DB00207	-	-
P43220	DB00368	-	-
P43220	DB00890	-	-
P43220	DB00892	-	-
P43220	DB00627	-	-
P43220	DB00482	-	-
P43220	DB00481	-	-
P43220	DB01175	-	-
P43220	DB00973	-	-
P43220	DB01100	-	-
P43220	DB00508	-	-
P43220	DB01105	-	-
P43220	DB01104	-	-
P43220	DB00502	-	-
P43220	DB01222	-	-
P43220	DB00116	-	-
P43220	DB01188	-	-
P43220	DB01622	-	-
P43220	DB01623	-	-
P43220	DB01624	-	-
P43220	DB00680	-	-
P43220	DB01422	-	-
P43220	DB01182	-	-
P43220	DB00468	-	-
P43220	DB00694	-	-
P43220	DB00321	-	-
P43220	DB04844	-	-
P43220	DB00988	-	-
P43220	DB00358	-	-
P43220	DB00987	-	-
P43220	DB00983	-	-
P43220	DB00867	-	-
P43220	DB01113	-	-
P43220	DB01110	-	-
P43220	DB01114	-	-
P43220	DB08800	-	-
P43220	DB00807	-	-
P43220	DB01614	-	-
P43220	DB00773	-	-
P43220	DB01616	-	-
P43220	DB04837	-	-
P43220	DB01204	-	-
P43220	DB01074	-	-
P43220	DB00476	-	-
P43220	DB00477	-	-
P43220	DB00206	-	-
P43220	DB00472	-	-
P43220	DB00816	-	-
P43220	DB00661	-	-
P43220	DB01196	-	-
P43220	DB00571	-	-
P43220	DB00668	-	-
P43220	DB00553	-	-
P43220	DB00714	-	-
P43220	DB00340	-	-
P43220	DB00269	-	-
P43220	DB00344	-	-
P43220	DB00582	-	-
P43220	DB00878	-	-
P43220	DB00737	-	-
P43220	DB00871	-	-
P43220	DB00279	-	-
P43220	DB00637	-	-
P43220	DB00385	-	-
P43220	DB00619	-	-
P43220	DB00525	-	-
P43220	DB00527	-	-
P43220	DB01127	-	-
P43220	DB00639	-	-
P43220	DB01232	-	-
P43220	DB01036	-	-
P43220	DB01408	-	-
P43220	DB00449	-	-
P43220	DB00445	-	-
P43220	DB00444	-	-
P43220	DB00335	-	-
P43220	DB01406	-	-
P43220	DB01403	-	-
P43220	DB01274	-	-
P43220	DB08801	-	-
P43220	DB00215	-	-
P43220	DB00234	-	-
P43220	DB00235	-	-
P43220	DB01023	-	-
P43220	DB00920	-	-
P43220	DB00433	-	-
P43220	DB06704	-	-
P43220	DB01118	-	-
P43220	DB00972	-	-
P43220	DB00907	-	-
P43220	DB00620	-	-
P43220	DB00602	-	-
P43220	DB00289	-	-
P43220	DB00288	-	-
P43220	DB00388	-	-
P43220	DB01227	-	-
P43220	DB00514	-	-
P43220	DB00283	-	-
P43220	DB01026	-	-
P43220	DB01024	-	-
P43220	DB01042	-	-
P43220	DB00681	-	-
P43220	DB01346	-	-
P43220	DB01433	-	-
P43220	DB01151	-	-
P43220	DB00685	-	-
P43220	DB00455	-	-
P43220	DB00205	-	-
P43220	DB00735	-	-
P43220	DB04571	-	-
P43220	DB04880	-	-
P43220	DB00450	-	-
P43220	DB01364	-	-
P43220	DB00997	-	-
P43220	DB00208	-	-
P43220	DB00623	-	-
P43220	DB05266	-	-
P43220	DB00857	-	-
P43220	DB00850	-	-
P43220	DB00851	-	-
P43220	DB00852	-	-
P43220	DB00309	-	-
[truncated: 1,668 more rows]

## Sheet: Gastrointestinal
Protein	Drug name	Plant source	Plant compound
P04150	-	TAXID:51089	Meso-Dihydroguaiaretic Acid
P04150	-	TAXID:51089	Verrucosin
P04150	-	TAXID:4006	Podophyllotoxin
P04150	DB01097	-	-
P04150	DB01095	-	-
P04150	DB00709	-	-
P04150	DB00258	-	-
P04150	DB00259	-	-
P04150	DB00700	-	-
P04150	DB00701	-	-
P04150	DB00251	-	-
P04150	DB00704	-	-
P04150	DB00257	-	-
P04150	DB00254	-	-
P04150	DB00255	-	-
P04150	DB00313	-	-
P04150	DB00310	-	-
P04150	DB00316	-	-
P04150	DB00091	-	-
P04150	DB00319	-	-
P04150	DB00478	-	-
P04150	DB00570	-	-
P04150	DB00882	-	-
P04150	DB01156	-	-
P04150	DB00184	-	-
P04150	DB01151	-	-
P04150	DB00650	-	-
P04150	DB00227	-	-
P04150	DB00224	-	-
P04150	DB00222	-	-
P04150	DB00220	-	-
P04150	DB00962	-	-
P04150	DB00888	-	-
P04150	DB06710	-	-
P04150	DB03255	-	-
P04150	DB00178	-	-
P04150	DB01075	-	-
P04150	DB01074	-	-
P04150	DB00175	-	-
P04150	DB01076	-	-
P04150	DB00252	-	-
P04150	DB00672	-	-
P04150	DB00674	-	-
P04150	DB00675	-	-
P04150	DB00679	-	-
P04150	DB01275	-	-
P04150	DB02959	-	-
P04150	DB00795	-	-
P04150	DB00794	-	-
P04150	DB00793	-	-
P04150	DB00823	-	-
P04150	DB00822	-	-
P04150	DB00415	-	-
P04150	DB00829	-	-
P04150	DB00411	-	-
P04150	DB00412	-	-
P04150	DB00798	-	-
P04150	DB00555	-	-
P04150	DB00554	-	-
P04150	DB00550	-	-
P04150	DB00553	-	-
P04150	DB00959	-	-
P04150	DB00489	-	-
P04150	DB00488	-	-
P04150	DB00483	-	-
P04150	DB00950	-	-
P04150	DB00481	-	-
P04150	DB00487	-	-
P04150	DB00484	-	-
P04150	DB01103	-	-
P04150	DB01105	-	-
P04150	DB01104	-	-
P04150	DB00214	-	-
P04150	DB00215	-	-
P04150	DB00359	-	-
P04150	DB00357	-	-
P04150	DB00356	-	-
P04150	DB00353	-	-
P04150	DB00350	-	-
P04150	DB01208	-	-
P04150	DB01203	-	-
P04150	DB01200	-	-
P04150	DB01201	-	-
P04150	DB01611	-	-
P04150	DB01204	-	-
P04150	DB01205	-	-
P04150	DB01199	-	-
P04150	DB01193	-	-
P04150	DB01190	-	-
P04150	DB01191	-	-
P04150	DB01197	-	-
P04150	DB00361	-	-
P04150	DB01299	-	-
P04150	DB01030	-	-
P04150	DB00915	-	-
P04150	DB00928	-	-
P04150	DB00916	-	-
P04150	DB00911	-	-
P04150	DB00529	-	-
P04150	DB00524	-	-
P04150	DB00525	-	-
P04150	DB00919	-	-
P04150	DB00523	-	-
P04150	DB01035	-	-
P04150	DB01037	-	-
P04150	DB01408	-	-
P04150	DB00132	-	-
P04150	DB01032	-	-
P04150	DB01406	-	-
P04150	DB01407	-	-
P04150	DB01400	-	-
P04150	DB00846	-	-
P04150	DB01039	-	-
P04150	DB00951	-	-
P04150	DB00285	-	-
P04150	DB00284	-	-
P04150	DB00281	-	-
P04150	DB00283	-	-
P04150	DB00389	-	-
P04150	DB00328	-	-
P04150	DB00750	-	-
P04150	DB00756	-	-
P04150	DB00755	-	-
P04150	DB00322	-	-
P04150	DB00320	-	-
P04150	DB00758	-	-
P04150	DB00455	-	-
P04150	DB00324	-	-
P04150	DB00457	-	-
P04150	DB04571	-	-
P04150	DB00859	-	-
P04150	DB00857	-	-
P04150	DB00850	-	-
P04150	DB00851	-	-
P04150	DB00780	-	-
P04150	DB00428	-	-
P04150	DB00834	-	-
P04150	DB00783	-	-
P04150	DB00784	-	-
P04150	DB00939	-	-
P04150	DB00831	-	-
P04150	DB00421	-	-
P04150	DB00789	-	-
P04150	DB00935	-	-
P04150	DB00390	-	-
P04150	DB00396	-	-
P04150	DB00394	-	-
P04150	DB00547	-	-
P04150	DB00544	-	-
P04150	DB00542	-	-
P04150	DB00543	-	-
P04150	DB00540	-	-
P04150	DB01018	-	-
P04150	DB01016	-	-
P04150	DB01015	-	-
P04150	DB01014	-	-
P04150	DB01011	-	-
P04150	DB00549	-	-
P04150	DB00233	-	-
P04150	DB00495	-	-
P04150	DB00490	-	-
P04150	DB00493	-	-
P04150	DB08826	-	-
P04150	DB00498	-	-
P04150	DB00499	-	-
P04150	DB00321	-	-
P04150	DB00945	-	-
P04150	DB00788	-	-
P04150	DB00734	-	-
P04150	DB00731	-	-
P04150	DB00309	-	-
P04150	DB00733	-	-
P04150	DB00305	-	-
P04150	DB00738	-	-
P04150	DB00302	-	-
P04150	DB01606	-	-
P04150	DB01167	-	-
P04150	DB01166	-	-
P04150	DB01165	-	-
P04150	DB01162	-	-
P04150	DB00426	-	-
P04150	DB01229	-	-
P04150	DB01224	-	-
P04150	DB01287	-	-
P04150	DB01186	-	-
P04150	DB01068	-	-
P04150	DB01069	-	-
P04150	DB00649	-	-
P04150	DB00648	-	-
P04150	DB00162	-	-
P04150	DB00163	-	-
P04150	DB01062	-	-
P04150	DB01060	-	-
P04150	DB01061	-	-
P04150	DB00641	-	-
P04150	DB01067	-	-
P04150	DB01064	-	-
P04150	DB01065	-	-
P04150	DB01357	-	-
P04150	DB00839	-	-
P04150	DB00749	-	-
P04150	DB00298	-	-
P04150	DB00744	-	-
P04150	DB00297	-	-
P04150	DB00740	-	-
P04150	DB00741	-	-
P04150	DB00742	-	-
P04150	DB00291	-	-
P04150	DB00465	-	-
P04150	DB00450	-	-
P04150	DB00467	-	-
P04150	DB00461	-	-
P04150	DB00462	-	-
P04150	DB00469	-	-
P04150	DB00452	-	-
P04150	DB00196	-	-
P04150	DB00190	-	-
P04150	DB00193	-	-
P04150	DB00199	-	-
P04150	DB00861	-	-
P04150	DB00860	-	-
P04150	DB00863	-	-
P04150	DB00325	-	-
P04150	DB00864	-	-
P04150	DB01113	-	-
P04150	DB01110	-	-
P04150	DB01114	-	-
P04150	DB01115	-	-
P04150	DB00177	-	-
P04150	DB01118	-	-
P04150	DB01119	-	-
P04150	DB01077	-	-
P04150	DB00263	-	-
P04150	DB00262	-	-
P04150	DB00266	-	-
P04150	DB00265	-	-
P04150	DB00264	-	-
P04150	DB00342	-	-
P04150	DB00343	-	-
P04150	DB00347	-	-
P04150	DB00423	-	-
P04150	DB00635	-	-
P04150	DB00636	-	-
P04150	DB00637	-	-
P04150	DB00630	-	-
P04150	DB01233	-	-
P04150	DB01232	-	-
P04150	DB01231	-	-
P04150	DB01235	-	-
P04150	DB01234	-	-
P04150	DB00518	-	-
P04150	DB00904	-	-
P04150	DB01595	-	-
P04150	DB00903	-	-
P04150	DB00513	-	-
P04150	DB00512	-	-
P04150	DB00515	-	-
P04150	DB00514	-	-
P04150	DB00120	-	-
P04150	DB01438	-	-
P04150	DB00122	-	-
P04150	DB01023	-	-
P04150	DB00126	-	-
P04150	DB01021	-	-
P04150	DB00681	-	-
P04150	DB00682	-	-
P04150	DB01435	-	-
P04150	DB00684	-	-
P04150	DB01436	-	-
P04150	DB00999	-	-
P04150	DB00995	-	-
P04150	DB00994	-	-
P04150	DB00997	-	-
P04150	DB00996	-	-
P04150	DB00991	-	-
P04150	DB00437	-	-
P04150	DB04552	-	-
P04150	DB04573	-	-
P04150	DB00836	-	-
P04150	DB00153	-	-
P04150	DB01092	-	-
P04150	DB01091	-	-
P04150	DB00656	-	-
P04150	DB00655	-	-
P04150	DB01099	-	-
P04150	DB00651	-	-
P04150	DB01253	-	-
P04150	DB00166	-	-
P04150	DB00393	-	-
P04150	DB00420	-	-
P04150	DB01380	-	-
P04150	DB00391	-	-
P04150	DB00384	-	-
P04150	DB00841	-	-
P04150	DB00934	-	-
P04150	DB00381	-	-
P04150	DB00382	-	-
P04150	DB00844	-	-
P04150	DB00920	-	-
P04150	DB00433	-	-
P04150	DB00848	-	-
P04150	DB00925	-	-
P04150	DB00434	-	-
P04150	DB00424	-	-
P04150	DB01008	-	-
P04150	DB01009	-	-
P04150	DB00531	-	-
P04150	DB00537	-	-
P04150	DB01001	-	-
P04150	DB01002	-	-
P04150	DB01003	-	-
P04150	DB01005	-	-
P04150	DB01006	-	-
P04150	DB00541	-	-
P04150	DB00279	-	-
P04150	DB00274	-	-
P04150	DB00418	-	-
P04150	DB00277	-	-
P04150	DB00271	-	-
P04150	DB00376	-	-
P04150	DB00373	-	-
P04150	DB06803	-	-
P04150	DB00379	-	-
P04150	DB06151	-	-
P04150	DB06150	-	-
P04150	DB01171	-	-
P04150	DB01172	-	-
P04150	DB01173	-	-
P04150	DB01174	-	-
P04150	DB01175	-	-
P04150	DB01176	-	-
P04150	DB01177	-	-
P04150	DB01179	-	-
P04150	DB06637	-	-
P04150	DB00643	-	-
P04150	DB00970	-	-
P04150	DB00977	-	-
P04150	DB00975	-	-
P04150	DB00502	-	-
P04150	DB00503	-	-
P04150	DB00500	-	-
P04150	DB01586	-	-
P04150	DB01581	-	-
P04150	DB00507	-	-
P04150	DB01582	-	-
P04150	DB01053	-	-
P04150	DB00698	-	-
P04150	DB01050	-	-
P04150	DB01056	-	-
P04150	DB01055	-	-
P04150	DB01054	-	-
P04150	DB00692	-	-
P04150	DB01351	-	-
P04150	DB01420	-	-
P04150	DB01058	-	-
P04150	DB01426	-	-
P04150	DB01427	-	-
P04150	DB00694	-	-
P04150	DB00695	-	-
P04150	DB00987	-	-
P04150	DB00982	-	-
P04150	DB00981	-	-
P04150	DB00591	-	-
P04150	DB00590	-	-
P04150	DB00593	-	-
P04150	DB00595	-	-
P04150	DB08906	-	-
P04150	DB00598	-	-
P04150	DB00778	-	-
P04150	DB00809	-	-
P04150	DB00808	-	-
P04150	DB00807	-	-
P04150	DB00806	-	-
P04150	DB00773	-	-
P04150	DB00804	-	-
P04150	DB00776	-	-
P04150	DB00477	-	-
P04150	DB00472	-	-
P04150	DB00471	-	-
P04150	DB00577	-	-
P04150	DB00576	-	-
P04150	DB00575	-	-
P04150	DB00573	-	-
P04150	DB00572	-	-
P04150	DB00571	-	-
P04150	DB00479	-	-
P04150	DB00186	-	-
P04150	DB00187	-	-
P04150	DB00169	-	-
P04150	DB00180	-	-
P04150	DB00181	-	-
P04150	DB00878	-	-
P04150	DB00871	-	-
P04150	DB00877	-	-
P04150	DB00874	-	-
P04150	DB01128	-	-
P04150	DB01121	-	-
P04150	DB01120	-	-
P04150	DB01127	-	-
P04150	DB01125	-	-
P04150	DB01124	-	-
P04150	DB00330	-	-
P04150	DB00238	-	-
P04150	DB00239	-	-
P04150	DB00335	-	-
P04150	DB01087	-	-
P04150	DB00235	-	-
P04150	DB00600	-	-
P04150	DB00602	-	-
P04150	DB00604	-	-
P04150	DB00609	-	-
P04150	DB01221	-	-
P04150	DB01222	-	-
P04150	DB01223	-	-
P04150	DB00898	-	-
P04150	DB00482	-	-
P04150	DB00936	-	-
P04150	DB01339	-	-
P04150	DB00730	-	-
P04150	DB01026	-	-
P04150	DB01148	-	-
P04150	DB01147	-	-
P04150	DB01143	-	-
P04150	DB01142	-	-
P04150	DB01082	-	-
P04150	DB00978	-	-
P04150	DB01086	-	-
P04150	DB00145	-	-
P04150	DB00623	-	-
P04150	DB00620	-	-
P04150	DB00627	-	-
P04150	DB00624	-	-
P04150	DB01242	-	-
P04150	DB01241	-	-
P04150	DB01248	-	-
P04150	DB01394	-	-
P04150	DB01396	-	-
P04150	DB06148	-	-
P04150	DB01392	-	-
P04150	DB01393	-	-
P04150	DB06147	-	-
P04150	DB01399	-	-
P04150	DB00818	-	-
P04150	DB00819	-	-
P04150	DB00762	-	-
P04150	DB00763	-	-
P04150	DB00812	-	-
P04150	DB00814	-	-
P04150	DB00765	-	-
P04150	DB00568	-	-
P04150	DB00401	-	-
P04150	DB00400	-	-
P04150	DB00406	-	-
P04150	DB00404	-	-
P04150	DB00561	-	-
P04150	DB00563	-	-
P04150	DB00564	-	-
P04150	DB01059	-	-
P04150	DB04841	-	-
P04150	DB00567	-	-
P04150	DB00759	-	-
P04150	DB00696	-	-
P04150	DB00884	-	-
P04150	DB00968	-	-
P04150	DB00969	-	-
P04150	DB00881	-	-
P04150	DB00967	-	-
P04150	DB00960	-	-
P04150	DB00961	-	-
P04150	DB00889	-	-
P04150	DB00963	-	-
P04150	DB06729	-	-
P04150	DB00249	-	-
P04150	DB00717	-	-
P04150	DB00715	-	-
P04150	DB00242	-	-
P04150	DB00245	-	-
P04150	DB00712	-	-
P04150	DB00247	-	-
P04150	DB00367	-	-
P04150	DB00365	-	-
P04150	DB00363	-	-
P04150	DB00688	-	-
P04150	DB01024	-	-
P04150	DB03166	-	-
P04150	DB00614	-	-
P04150	DB00615	-	-
P04150	DB01211	-	-
P04150	DB01210	-	-
P04150	DB01213	-	-
P04150	DB00619	-	-
P04150	DB01217	-	-
P04150	DB01216	-	-
P04150	DB06698	-	-
P04150	DB01188	-	-
P04150	DB01627	-	-
P04150	DB01181	-	-
P04150	DB06691	-	-
P04150	DB01183	-	-
P04150	DB01182	-	-
P04150	DB01185	-	-
P04150	DB01184	-	-
P04150	DB06697	-	-
P04150	DB00685	-	-
P04150	DB00811	-	-
P04150	DB01029	-	-
P04150	DB00760	-	-
P04150	DB08807	-	-
P04150	DB04838	-	-
P04150	DB01599	-	-
P04150	DB01044	-	-
P04150	DB01045	-	-
P04150	DB00104	-	-
P04150	DB01047	-	-
P04150	DB01041	-	-
P04150	DB01042	-	-
P04150	DB04930	-	-
P04150	DB00661	-	-
P04150	DB00669	-	-
P04150	DB00668	-	-
P04150	DB00583	-	-
P04150	DB00586	-	-
P04150	DB00584	-	-
P04150	DB00585	-	-
P04150	DB08797	-	-
P04150	DB00588	-	-
P04150	DB00589	-	-
P04150	DB00339	-	-
P04150	DB00724	-	-
P04150	DB00725	-	-
P04150	DB00722	-	-
P04150	DB00721	-	-
P04150	DB00331	-	-
P04150	DB00446	-	-
P04150	DB00445	-	-
P04150	DB00443	-	-
P04150	DB00334	-	-
P04150	DB00441	-	-
P04150	DB01168	-	-
P04150	DB01136	-	-
P04150	DB01137	-	-
P04150	DB01132	-	-
P04150	DB01206	-	-
P04150	DB00207	-	-
P04150	DB00206	-	-
P04150	DB00201	-	-
P04150	DB00202	-	-
P04150	DB00208	-	-
P04150	DB06770	-	-
P04150	DB06777	-	-
P41145	-	TAXID:65948	Apigenin
P41145	-	TAXID:74900	Hyperin
P41145	-	TAXID:51240	(-)-Epigallocatechin
P41145	-	TAXID:58860	(+)-Catechin
P41145	-	TAXID:4081	Naringenin
P41145	-	TAXID:4442	(-)-Epigallocatechin
P41145	-	TAXID:4442	Hesperetin
P41145	-	TAXID:4442	(+)-Catechin
P41145	-	TAXID:4442	Apigenin
P41145	-	TAXID:4442	Daidzein
P41145	-	TAXID:4442	Epicatechin Gallate
P41145	-	TAXID:4442	Naringenin
P41145	-	TAXID:4577	Naringenin
P41145	-	TAXID:36610	Apigenin
P41145	-	TAXID:36610	Hyperin
P41145	-	TAXID:4513	(+)-Catechin
P41145	-	TAXID:4679	Taxifolin
P41145	-	TAXID:4047	Falcarindiol
P41145	-	TAXID:78168	Apigenin
P41145	-	TAXID:175228	Taxifolin
P41145	-	TAXID:89151	Apigenin
P41145	-	TAXID:3760	Hesperetin
P41145	-	TAXID:32224	(+)-Catechin
P41145	-	TAXID:32224	(-)-Epigallocatechin
P41145	-	TAXID:4146	Apigenin
P41145	-	TAXID:4045	Apigenin
P41145	-	TAXID:4045	Hyperin
P41145	-	TAXID:3469	Tramadol
P41145	-	TAXID:3864	(+)-Catechin
P41145	-	TAXID:29760	(+)-Catechin
P41145	-	TAXID:29760	(-)-Epigallocatechin
P41145	-	TAXID:29780	(+)-Catechin
P41145	-	TAXID:29780	(-)-Epigallocatechin
P41145	-	TAXID:3649	Daidzein
P41145	-	TAXID:3747	(+)-Catechin
P41145	-	TAXID:3747	Naringenin
P41145	-	TAXID:3747	(-)-Epigallocatechin
P41145	-	TAXID:3708	Naringenin
P41145	-	TAXID:120290	(+)-Catechin
P41145	-	TAXID:120290	Naringenin
P41145	-	TAXID:120290	Hyperin
P41145	-	TAXID:40922	Falcarindiol
P41145	-	TAXID:4681	Hyperin
P41145	-	TAXID:49827	Naringenin
P41145	-	TAXID:35925	(+)-Catechin
P41145	-	TAXID:35925	(-)-Epigallocatechin
P41145	-	TAXID:3888	Naringenin
P41145	-	TAXID:3888	Daidzein
P41145	-	TAXID:94328	Apigenin
P41145	-	TAXID:151069	(+)-Catechin
P41145	-	TAXID:151069	Taxifolin
P41145	-	TAXID:41241	(+)-Catechin
P41145	-	TAXID:4072	Apigenin
P41145	-	TAXID:48038	Falcarindiol
P41145	-	TAXID:3847	(+)-Catechin
P41145	-	TAXID:3847	Apigenin
P41145	-	TAXID:3847	Naringenin
P41145	-	TAXID:3847	Daidzein
P41145	-	TAXID:74645	(+)-Catechin
P41145	-	TAXID:22663	(-)-Epigallocatechin
P41145	-	TAXID:3435	(+)-Catechin
P41145	-	TAXID:3617	(+)-Catechin
P41145	-	TAXID:4039	Falcarindiol
P41145	-	TAXID:4113	(+)-Catechin
P41145	-	TAXID:3641	(+)-Catechin
P41145	DB01064	-	-
P41145	DB01097	-	-
P41145	DB00153	-	-
P41145	DB00709	-	-
P41145	DB00258	-	-
P41145	DB00259	-	-
P41145	DB00252	-	-
P41145	DB00701	-	-
P41145	DB00251	-	-
P41145	DB00704	-	-
P41145	DB00257	-	-
P41145	DB00254	-	-
P41145	DB00255	-	-
P41145	DB00313	-	-
P41145	DB00310	-	-
P41145	DB00316	-	-
P41145	DB00091	-	-
P41145	DB00319	-	-
P41145	DB00318	-	-
P41145	DB00478	-	-
P41145	DB00570	-	-
P41145	DB00882	-	-
P41145	DB06274	-	-
P41145	DB01156	-	-
P41145	DB01151	-	-
P41145	DB00650	-	-
P41145	DB00227	-	-
P41145	DB00224	-	-
P41145	DB00222	-	-
P41145	DB00220	-	-
P41145	DB00962	-	-
P41145	DB06710	-	-
P41145	DB03255	-	-
P41145	DB00178	-	-
P41145	DB01075	-	-
P41145	DB01074	-	-
P41145	DB01077	-	-
P41145	DB01076	-	-
P41145	DB00672	-	-
P41145	DB00674	-	-
P41145	DB00675	-	-
P41145	DB00679	-	-
P41145	DB01275	-	-
P41145	DB00795	-	-
P41145	DB00794	-	-
P41145	DB00793	-	-
P41145	DB00823	-	-
P41145	DB00822	-	-
P41145	DB00415	-	-
P41145	DB00829	-	-
P41145	DB00411	-	-
P41145	DB00412	-	-
P41145	DB00798	-	-
P41145	DB00555	-	-
P41145	DB00554	-	-
P41145	DB00550	-	-
P41145	DB00553	-	-
P41145	DB00959	-	-
P41145	DB00489	-	-
P41145	DB00488	-	-
P41145	DB00483	-	-
P41145	DB00950	-	-
P41145	DB00481	-	-
P41145	DB00487	-	-
P41145	DB00484	-	-
P41145	DB01100	-	-
P41145	DB01103	-	-
P41145	DB01105	-	-
P41145	DB01104	-	-
P41145	DB00214	-	-
P41145	DB00215	-	-
P41145	DB00359	-	-
P41145	DB00357	-	-
P41145	DB00356	-	-
P41145	DB00353	-	-
P41145	DB00350	-	-
P41145	DB01208	-	-
P41145	DB01203	-	-
P41145	DB01200	-	-
P41145	DB01201	-	-
P41145	DB01611	-	-
P41145	DB01204	-	-
P41145	DB01205	-	-
P41145	DB01199	-	-
P41145	DB01193	-	-
P41145	DB01190	-	-
P41145	DB01191	-	-
P41145	DB01197	-	-
P41145	DB01299	-	-
P41145	DB00915	-	-
P41145	DB00384	-	-
P41145	DB00916	-	-
P41145	DB00911	-	-
P41145	DB00529	-	-
P41145	DB00524	-	-
P41145	DB00525	-	-
P41145	DB00919	-	-
P41145	DB00523	-	-
P41145	DB01035	-	-
P41145	DB01037	-	-
P41145	DB01408	-	-
P41145	DB01030	-	-
P41145	DB01032	-	-
P41145	DB01406	-	-
P41145	DB01407	-	-
P41145	DB01400	-	-
P41145	DB00846	-	-
P41145	DB01039	-	-
P41145	DB00951	-	-
P41145	DB00433	-	-
P41145	DB00421	-	-
P41145	DB00285	-	-
P41145	DB00284	-	-
P41145	DB00281	-	-
P41145	DB00283	-	-
P41145	DB00437	-	-
P41145	DB00328	-	-
P41145	DB00750	-	-
P41145	DB00756	-	-
P41145	DB00755	-	-
P41145	DB00322	-	-
P41145	DB00320	-	-
P41145	DB00758	-	-
P41145	DB00454	-	-
P41145	DB00327	-	-
P41145	DB00324	-	-
P41145	DB00457	-	-
P41145	DB04571	-	-
P41145	DB00859	-	-
P41145	DB00854	-	-
P41145	DB00857	-	-
P41145	DB00850	-	-
P41145	DB00851	-	-
P41145	DB00836	-	-
P41145	DB00428	-	-
P41145	DB00834	-	-
P41145	DB00783	-	-
P41145	DB00784	-	-
P41145	DB00939	-	-
P41145	DB00831	-	-
P41145	DB00393	-	-
P41145	DB00789	-	-
P41145	DB00935	-	-
P41145	DB00390	-	-
P41145	DB00424	-	-
P41145	DB00394	-	-
P41145	DB00547	-	-
P41145	DB00544	-	-
P41145	DB00542	-	-
P41145	DB00543	-	-
P41145	DB00540	-	-
P41145	DB01018	-	-
P41145	DB01016	-	-
P41145	DB01015	-	-
P41145	DB01014	-	-
P41145	DB01011	-	-
P41145	DB00549	-	-
P41145	DB00233	-	-
P41145	DB00495	-	-
P41145	DB00490	-	-
P41145	DB00493	-	-
P41145	DB08826	-	-
P41145	DB00498	-	-
P41145	DB00499	-	-
P41145	DB00321	-	-
P41145	DB00945	-	-
P41145	DB00734	-	-
P41145	DB00731	-	-
P41145	DB00309	-	-
P41145	DB00733	-	-
P41145	DB00305	-	-
P41145	DB00738	-	-
P41145	DB00302	-	-
P41145	DB01606	-	-
P41145	DB01167	-	-
P41145	DB01166	-	-
P41145	DB01165	-	-
P41145	DB01162	-	-
P41145	DB00426	-	-
P41145	DB01168	-	-
P41145	DB01287	-	-
P41145	DB06697	-	-
P41145	DB01068	-	-
P41145	DB01069	-	-
P41145	DB00649	-	-
P41145	DB00648	-	-
P41145	DB00163	-	-
P41145	DB01062	-	-
P41145	DB01060	-	-
P41145	DB01061	-	-
P41145	DB00641	-	-
P41145	DB01067	-	-
P41145	DB00643	-	-
P41145	DB01065	-	-
P41145	DB01357	-	-
P41145	DB00749	-	-
P41145	DB00298	-	-
P41145	DB00744	-	-
P41145	DB00297	-	-
P41145	DB00295	-	-
P41145	DB00740	-	-
P41145	DB00741	-	-
P41145	DB00742	-	-
P41145	DB00291	-	-
P41145	DB00465	-	-
P41145	DB00450	-	-
P41145	DB00467	-	-
P41145	DB00461	-	-
P41145	DB00462	-	-
P41145	DB00469	-	-
P41145	DB00452	-	-
P41145	DB00196	-	-
P41145	DB00190	-	-
P41145	DB00193	-	-
P41145	DB00199	-	-
P41145	DB00455	-	-
P41145	DB00861	-	-
P41145	DB00860	-	-
P41145	DB00863	-	-
P41145	DB00325	-	-
P41145	DB00864	-	-
P41145	DB01113	-	-
P41145	DB01110	-	-
P41145	DB01114	-	-
P41145	DB01115	-	-
P41145	DB00177	-	-
P41145	DB01118	-	-
P41145	DB01119	-	-
P41145	DB00175	-	-
P41145	DB00263	-	-
P41145	DB00262	-	-
P41145	DB00266	-	-
P41145	DB00265	-	-
P41145	DB00264	-	-
P41145	DB00342	-	-
P41145	DB00343	-	-
P41145	DB00347	-	-
P41145	DB00423	-	-
P41145	DB00635	-	-
P41145	DB00636	-	-
P41145	DB00637	-	-
P41145	DB00630	-	-
P41145	DB01233	-	-
P41145	DB01232	-	-
P41145	DB01231	-	-
P41145	DB01235	-	-
P41145	DB01234	-	-
P41145	DB00104	-	-
P41145	DB00518	-	-
P41145	DB00904	-	-
P41145	DB01047	-	-
P41145	DB00903	-	-
P41145	DB00513	-	-
P41145	DB00512	-	-
P41145	DB00515	-	-
P41145	DB00514	-	-
P41145	DB01026	-	-
P41145	DB00688	-	-
P41145	DB00122	-	-
P41145	DB01023	-	-
P41145	DB00126	-	-
P41145	DB01021	-	-
P41145	DB00681	-	-
P41145	DB00682	-	-
P41145	DB01435	-	-
P41145	DB00684	-	-
P41145	DB01436	-	-
P41145	DB00999	-	-
P41145	DB00995	-	-
P41145	DB00994	-	-
P41145	DB00997	-	-
P41145	DB00996	-	-
P41145	DB00991	-	-
P41145	DB04552	-	-
P41145	DB04573	-	-
P41145	DB00780	-	-
P41145	DB01095	-	-
P41145	DB01094	-	-
P41145	DB01092	-	-
P41145	DB01091	-	-
P41145	DB00656	-	-
P41145	DB00655	-	-
P41145	DB00652	-	-
P41145	DB01099	-	-
P41145	DB00651	-	-
P41145	DB01253	-	-
P41145	DB00166	-	-
P41145	DB00788	-	-
P41145	DB00420	-	-
P41145	DB01380	-	-
P41145	DB00391	-	-
P41145	DB00928	-	-
P41145	DB00841	-	-
P41145	DB00934	-	-
P41145	DB00381	-	-
P41145	DB00382	-	-
P41145	DB00844	-	-
P41145	DB00920	-	-
P41145	DB00921	-	-
P41145	DB00848	-	-
P41145	DB00389	-	-
P41145	DB00434	-	-
P41145	DB00396	-	-
P41145	DB01008	-	-
P41145	DB01009	-	-
P41145	DB00531	-	-
P41145	DB00537	-	-
P41145	DB01001	-	-
P41145	DB01002	-	-
P41145	DB01003	-	-
P41145	DB01005	-	-
P41145	DB01006	-	-
P41145	DB00541	-	-
P41145	DB00279	-	-
P41145	DB00274	-	-
P41145	DB00418	-	-
P41145	DB00277	-	-
P41145	DB00271	-	-
P41145	DB00376	-	-
P41145	DB00373	-	-
P41145	DB06800	-	-
P41145	DB00379	-	-
P41145	DB06150	-	-
P41145	DB01171	-	-
P41145	DB01172	-	-
P41145	DB01173	-	-
P41145	DB01174	-	-
P41145	DB01175	-	-
P41145	DB01176	-	-
P41145	DB01177	-	-
P41145	DB01179	-	-
P41145	DB00970	-	-
P41145	DB00977	-	-
P41145	DB00975	-	-
P41145	DB00502	-	-
P41145	DB00503	-	-
P41145	DB00500	-	-
P41145	DB00978	-	-
P41145	DB01581	-	-
P41145	DB01582	-	-
P41145	DB01053	-	-
P41145	DB00698	-	-
P41145	DB01050	-	-
P41145	DB01056	-	-
P41145	DB01055	-	-
P41145	DB01054	-	-
P41145	DB00692	-	-
P41145	DB01351	-	-
P41145	DB01059	-	-
P41145	DB01058	-	-
P41145	DB01426	-	-
P41145	DB01427	-	-
P41145	DB00694	-	-
P41145	DB00695	-	-
P41145	DB00987	-	-
P41145	DB00982	-	-
P41145	DB00981	-	-
P41145	DB00591	-	-
P41145	DB00590	-	-
P41145	DB00593	-	-
P41145	DB00595	-	-
P41145	DB00598	-	-
P41145	DB00778	-	-
P41145	DB00809	-	-
P41145	DB00808	-	-
P41145	DB00807	-	-
P41145	DB00806	-	-
P41145	DB00773	-	-
P41145	DB00804	-	-
P41145	DB00776	-	-
P41145	DB00477	-	-
P41145	DB00472	-	-
P41145	DB00471	-	-
P41145	DB00577	-	-
P41145	DB00576	-	-
P41145	DB00575	-	-
P41145	DB00573	-	-
P41145	DB00572	-	-
P41145	DB00571	-	-
P41145	DB00479	-	-
P41145	DB00186	-	-
P41145	DB00187	-	-
P41145	DB00184	-	-
P41145	DB00180	-	-
P41145	DB00181	-	-
P41145	DB00871	-	-
P41145	DB00877	-	-
P41145	DB00874	-	-
P41145	DB01128	-	-
P41145	DB01121	-	-
P41145	DB01120	-	-
P41145	DB01127	-	-
P41145	DB01125	-	-
P41145	DB00330	-	-
P41145	DB00445	-	-
P41145	DB00238	-	-
P41145	DB00239	-	-
P41145	DB00443	-	-
P41145	DB00145	-	-
P41145	DB00235	-	-
P41145	DB00600	-	-
P41145	DB00602	-	-
P41145	DB00604	-	-
P41145	DB01224	-	-
P41145	DB01221	-	-
P41145	DB01222	-	-
P41145	DB01223	-	-
P41145	DB00898	-	-
P41145	DB00482	-	-
P41145	DB00936	-	-
P41145	DB00956	-	-
P41145	DB01339	-	-
P41145	DB00730	-	-
P41145	DB01148	-	-
P41145	DB01147	-	-
P41145	DB01143	-	-
P41145	DB01142	-	-
P41145	DB01082	-	-
P41145	DB00839	-	-
P41145	DB01086	-	-
P41145	DB01087	-	-
P41145	DB00623	-	-
P41145	DB00620	-	-
P41145	DB00627	-	-
P41145	DB00624	-	-
P41145	DB01242	-	-
P41145	DB01243	-	-
P41145	DB01241	-	-
P41145	DB01248	-	-
P41145	DB01394	-	-
P41145	DB01396	-	-
P41145	DB06148	-	-
P41145	DB00169	-	-
P41145	DB01392	-	-
P41145	DB01393	-	-
P41145	DB06147	-	-
P41145	DB01399	-	-
P41145	DB00818	-	-
P41145	DB00819	-	-
P41145	DB00762	-	-
P41145	DB00763	-	-
P41145	DB00812	-	-
P41145	DB00813	-	-
P41145	DB00814	-	-
P41145	DB00765	-	-
P41145	DB00568	-	-
P41145	DB00401	-	-
P41145	DB00400	-	-
P41145	DB00406	-	-
P41145	DB00404	-	-
P41145	DB00561	-	-
P41145	DB00563	-	-
P41145	DB00564	-	-
P41145	DB04841	-	-
P41145	DB00567	-	-
P41145	DB00759	-	-
P41145	DB00696	-	-
P41145	DB00884	-	-
P41145	DB00968	-	-
P41145	DB00969	-	-
P41145	DB00881	-	-
P41145	DB00967	-	-
P41145	DB00960	-	-
P41145	DB00961	-	-
P41145	DB00889	-	-
P41145	DB00963	-	-
P41145	DB06729	-	-
P41145	DB00249	-	-
P41145	DB00717	-	-
P41145	DB00715	-	-
P41145	DB00242	-	-
P41145	DB00245	-	-
P41145	DB00712	-	-
P41145	DB00247	-	-
P41145	DB00367	-	-
P41145	DB00365	-	-
P41145	DB00363	-	-
P41145	DB00361	-	-
P41145	DB01024	-	-
P41145	DB03166	-	-
P41145	DB00611	-	-
P41145	DB00614	-	-
P41145	DB00615	-	-
P41145	DB01211	-	-
P41145	DB01210	-	-
P41145	DB01213	-	-
P41145	DB00619	-	-
P41145	DB01217	-	-
P41145	DB01216	-	-
P41145	DB06698	-	-
P41145	DB01188	-	-
P41145	DB01627	-	-
P41145	DB01181	-	-
P41145	DB06691	-	-
P41145	DB01183	-	-
P41145	DB01182	-	-
P41145	DB01184	-	-
P41145	DB01186	-	-
P41145	DB00685	-	-
P41145	DB00811	-	-
P41145	DB01029	-	-
P41145	DB00760	-	-
P41145	DB08807	-	-
P41145	DB04838	-	-
P41145	DB01599	-	-
P41145	DB01044	-	-
P41145	DB01045	-	-
P41145	DB01229	-	-
P41145	DB01595	-	-
P41145	DB01041	-	-
P41145	DB01042	-	-
P41145	DB00661	-	-
P41145	DB00669	-	-
P41145	DB00668	-	-
P41145	DB00583	-	-
P41145	DB00586	-	-
P41145	DB00584	-	-
P41145	DB00585	-	-
P41145	DB08797	-	-
P41145	DB00589	-	-
P41145	DB00339	-	-
P41145	DB00724	-	-
P41145	DB00725	-	-
P41145	DB00722	-	-
P41145	DB00721	-	-
P41145	DB00331	-	-
P41145	DB00446	-	-
P41145	DB00333	-	-
P41145	DB00335	-	-
P41145	DB00334	-	-
P41145	DB00441	-	-
P41145	DB01136	-	-
P41145	DB01137	-	-
P41145	DB01132	-	-
P41145	DB01206	-	-
P41145	DB00207	-	-
P41145	DB00206	-	-
P41145	DB00201	-	-
P41145	DB00202	-	-
P41145	DB00208	-	-
P41145	DB06770	-	-
P35372	-	TAXID:4222	Serotonin
P35372	-	TAXID:4681	Hyperin
P35372	-	TAXID:4513	(+)-Catechin
P35372	-	TAXID:65948	Apigenin
P35372	-	TAXID:74900	Hyperin
P35372	-	TAXID:49827	Naringenin
P35372	-	TAXID:58860	(+)-Catechin
P35372	-	TAXID:4081	Naringenin
P35372	-	TAXID:4081	Serotonin
P35372	-	TAXID:4442	(-)-Epigallocatechin
P35372	-	TAXID:4442	Hesperetin
P35372	-	TAXID:4442	(+)-Catechin
P35372	-	TAXID:4442	Apigenin
P35372	-	TAXID:4442	Daidzein
P35372	-	TAXID:4442	Epicatechin Gallate
P35372	-	TAXID:4442	Naringenin
P35372	-	TAXID:4577	Naringenin
P35372	-	TAXID:32224	(+)-Catechin
P35372	-	TAXID:32224	(-)-Epigallocatechin
P35372	-	TAXID:36610	Apigenin
P35372	-	TAXID:36610	Hyperin
P35372	-	TAXID:151069	(+)-Catechin
P35372	-	TAXID:151069	Taxifolin
P35372	-	TAXID:175228	Taxifolin
P35372	-	TAXID:35925	(+)-Catechin
P35372	-	TAXID:35925	(-)-Epigallocatechin
P35372	-	TAXID:3435	(+)-Catechin
P35372	-	TAXID:94328	Apigenin
P35372	-	TAXID:94328	Serotonin
P35372	-	TAXID:74645	(+)-Catechin
P35372	-	TAXID:4045	Apigenin
P35372	-	TAXID:4045	Hyperin
P35372	-	TAXID:4679	Taxifolin
P35372	-	TAXID:4072	Apigenin
P35372	-	TAXID:51240	(-)-Epigallocatechin
P35372	-	TAXID:78168	Apigenin
P35372	-	TAXID:41241	(+)-Catechin
P35372	-	TAXID:3641	(+)-Catechin
P35372	-	TAXID:3847	(+)-Catechin
P35372	-	TAXID:3847	Apigenin
P35372	-	TAXID:3847	Naringenin
P35372	-	TAXID:3847	Daidzein
P35372	-	TAXID:89151	Apigenin
P35372	-	TAXID:3760	Hesperetin
P35372	-	TAXID:3760	9-Amino-1234-Tetrahydroacridine
P35372	-	TAXID:120290	(+)-Catechin
P35372	-	TAXID:120290	Naringenin
P35372	-	TAXID:120290	Hyperin
P35372	-	TAXID:4146	Apigenin
P35372	-	TAXID:22663	(-)-Epigallocatechin
P35372	-	TAXID:3708	Naringenin
P35372	-	TAXID:3469	Codeinone
P35372	-	TAXID:3469	Hydrocotarnine
P35372	-	TAXID:3469	Oripavine
P35372	-	TAXID:3469	Codeine
P35372	-	TAXID:3469	Thebaine
P35372	-	TAXID:3469	Salutaridinol
P35372	-	TAXID:3469	Salutaridine
P35372	-	TAXID:3469	Tramadol
P35372	-	TAXID:3469	S-Reticuline
P35372	-	TAXID:29760	(+)-Catechin
P35372	-	TAXID:29760	(-)-Epigallocatechin
P35372	-	TAXID:29780	(+)-Catechin
P35372	-	TAXID:29780	(-)-Epigallocatechin
P35372	-	TAXID:3649	Daidzein
P35372	-	TAXID:3617	(+)-Catechin
P35372	-	TAXID:3747	(+)-Catechin
P35372	-	TAXID:3747	Naringenin
P35372	-	TAXID:3747	(-)-Epigallocatechin
P35372	-	TAXID:4113	(+)-Catechin
P35372	-	TAXID:4113	Serotonin
P35372	-	TAXID:3888	Naringenin
P35372	-	TAXID:3888	Daidzein
P35372	-	TAXID:3864	(+)-Catechin
P35372	DB01064	-	-
P35372	DB01097	-	-
P35372	DB00153	-	-
P35372	DB00709	-	-
P35372	DB00258	-	-
P35372	DB00259	-	-
P35372	DB00252	-	-
P35372	DB00701	-	-
P35372	DB00251	-	-
P35372	DB00704	-	-
P35372	DB00257	-	-
P35372	DB00254	-	-
P35372	DB00255	-	-
P35372	DB00313	-	-
P35372	DB00310	-	-
P35372	DB00316	-	-
P35372	DB00091	-	-
P35372	DB00319	-	-
P35372	DB00318	-	-
P35372	DB00478	-	-
P35372	DB00570	-	-
P35372	DB00882	-	-
P35372	DB06274	-	-
P35372	DB01156	-	-
P35372	DB01151	-	-
P35372	DB00650	-	-
P35372	DB00227	-	-
P35372	DB00224	-	-
P35372	DB00222	-	-
P35372	DB00220	-	-
P35372	DB00962	-	-
P35372	DB06710	-	-
P35372	DB03255	-	-
P35372	DB00178	-	-
P35372	DB01075	-	-
P35372	DB01074	-	-
P35372	DB01077	-	-
P35372	DB01076	-	-
P35372	DB00672	-	-
P35372	DB00674	-	-
P35372	DB00675	-	-
P35372	DB00679	-	-
P35372	DB01275	-	-
P35372	DB01060	-	-
P35372	DB00795	-	-
P35372	DB00794	-	-
P35372	DB00793	-	-
P35372	DB00823	-	-
P35372	DB00822	-	-
P35372	DB00415	-	-
P35372	DB00829	-	-
P35372	DB00411	-	-
P35372	DB00412	-	-
P35372	DB00798	-	-
P35372	DB00555	-	-
P35372	DB00554	-	-
P35372	DB00550	-	-
P35372	DB00553	-	-
P35372	DB00959	-	-
P35372	DB00489	-	-
P35372	DB00488	-	-
P35372	DB00483	-	-
P35372	DB00950	-	-
P35372	DB00481	-	-
P35372	DB00487	-	-
P35372	DB00484	-	-
P35372	DB01100	-	-
P35372	DB01103	-	-
P35372	DB01105	-	-
P35372	DB01104	-	-
P35372	DB00214	-	-
P35372	DB00215	-	-
P35372	DB00359	-	-
P35372	DB00357	-	-
P35372	DB00356	-	-
P35372	DB00353	-	-
P35372	DB00350	-	-
P35372	DB01208	-	-
P35372	DB01209	-	-
P35372	DB01203	-	-
P35372	DB01200	-	-
P35372	DB01201	-	-
P35372	DB01611	-	-
P35372	DB01204	-	-
P35372	DB01205	-	-
P35372	DB01199	-	-
P35372	DB01193	-	-
P35372	DB01190	-	-
P35372	DB01191	-	-
P35372	DB01197	-	-
P35372	DB01299	-	-
P35372	DB00915	-	-
P35372	DB00384	-	-
P35372	DB00916	-	-
P35372	DB00911	-	-
P35372	DB00529	-	-
P35372	DB00524	-	-
P35372	DB00525	-	-
P35372	DB00919	-	-
P35372	DB00523	-	-
P35372	DB01035	-	-
P35372	DB01037	-	-
P35372	DB01408	-	-
P35372	DB01030	-	-
P35372	DB01032	-	-
P35372	DB01406	-	-
P35372	DB01407	-	-
P35372	DB01400	-	-
P35372	DB00846	-	-
P35372	DB01039	-	-
P35372	DB00951	-	-
P35372	DB00433	-	-
P35372	DB00421	-	-
P35372	DB00285	-	-
P35372	DB00284	-	-
P35372	DB00281	-	-
P35372	DB00283	-	-
P35372	DB00437	-	-
P35372	DB00328	-	-
P35372	DB00750	-	-
P35372	DB00756	-	-
P35372	DB00755	-	-
P35372	DB00322	-	-
P35372	DB00320	-	-
P35372	DB00758	-	-
P35372	DB00454	-	-
P35372	DB00327	-	-
P35372	DB00324	-	-
P35372	DB00457	-	-
P35372	DB04571	-	-
P35372	DB00859	-	-
P35372	DB00854	-	-
P35372	DB00857	-	-
P35372	DB00850	-	-
P35372	DB00851	-	-
P35372	DB00836	-	-
P35372	DB00428	-	-
P35372	DB00834	-	-
P35372	DB00783	-	-
P35372	DB00784	-	-
P35372	DB00939	-	-
P35372	DB00831	-	-
P35372	DB00393	-	-
P35372	DB00789	-	-
P35372	DB00935	-	-
P35372	DB00390	-	-
P35372	DB00424	-	-
P35372	DB00394	-	-
P35372	DB00547	-	-
P35372	DB00544	-	-
P35372	DB00542	-	-
P35372	DB00543	-	-
P35372	DB00540	-	-
P35372	DB01018	-	-
P35372	DB01016	-	-
P35372	DB01015	-	-
P35372	DB01014	-	-
P35372	DB01011	-	-
P35372	DB00549	-	-
P35372	DB00233	-	-
P35372	DB00495	-	-
P35372	DB00497	-	-
P35372	DB00490	-	-
P35372	DB00493	-	-
P35372	DB08826	-	-
P35372	DB00498	-	-
P35372	DB00499	-	-
P35372	DB00321	-	-
P35372	DB00945	-	-
P35372	DB00734	-	-
P35372	DB00731	-	-
P35372	DB00309	-	-
P35372	DB00733	-	-
P35372	DB00305	-	-
P35372	DB00738	-	-
P35372	DB00302	-	-
P35372	DB01606	-	-
P35372	DB01167	-	-
P35372	DB01166	-	-
P35372	DB01165	-	-
P35372	DB01162	-	-
P35372	DB00426	-	-
P35372	DB01229	-	-
P35372	DB01287	-	-
P35372	DB06697	-	-
P35372	DB01068	-	-
P35372	DB01069	-	-
P35372	DB00649	-	-
P35372	DB00648	-	-
P35372	DB00163	-	-
P35372	DB01062	-	-
P35372	DB00647	-	-
P35372	DB01061	-	-
P35372	DB00641	-	-
P35372	DB01067	-	-
P35372	DB00643	-	-
P35372	DB01065	-	-
P35372	DB01357	-	-
P35372	DB00749	-	-
P35372	DB00298	-	-
P35372	DB00744	-	-
P35372	DB00297	-	-
P35372	DB00295	-	-
P35372	DB00740	-	-
P35372	DB00741	-	-
P35372	DB00742	-	-
P35372	DB00291	-	-
P35372	DB00465	-	-
P35372	DB00450	-	-
P35372	DB00467	-	-
P35372	DB00461	-	-
P35372	DB00462	-	-
P35372	DB00469	-	-
P35372	DB00452	-	-
P35372	DB00196	-	-
P35372	DB00190	-	-
P35372	DB00193	-	-
P35372	DB00199	-	-
P35372	DB00455	-	-
P35372	DB00861	-	-
P35372	DB00860	-	-
P35372	DB00863	-	-
P35372	DB00325	-	-
P35372	DB00864	-	-
P35372	DB01113	-	-
P35372	DB01110	-	-
P35372	DB01114	-	-
P35372	DB01115	-	-
P35372	DB00177	-	-
P35372	DB01118	-	-
P35372	DB01119	-	-
P35372	DB00175	-	-
P35372	DB00263	-	-
P35372	DB00262	-	-
P35372	DB00266	-	-
P35372	DB00265	-	-
P35372	DB00264	-	-
P35372	DB00342	-	-
P35372	DB00343	-	-
P35372	DB00347	-	-
P35372	DB00423	-	-
P35372	DB00635	-	-
P35372	DB00636	-	-
P35372	DB00637	-	-
P35372	DB00630	-	-
P35372	DB01233	-	-
P35372	DB01232	-	-
P35372	DB01231	-	-
P35372	DB01235	-	-
P35372	DB01234	-	-
P35372	DB01238	-	-
P35372	DB00518	-	-
P35372	DB00904	-	-
P35372	DB01047	-	-
P35372	DB00903	-	-
P35372	DB00513	-	-
P35372	DB00512	-	-
P35372	DB00515	-	-
P35372	DB00514	-	-
P35372	DB01026	-	-
P35372	DB00688	-	-
P35372	DB00122	-	-
P35372	DB01023	-	-
P35372	DB00126	-	-
P35372	DB01021	-	-
P35372	DB00681	-	-
P35372	DB00682	-	-
P35372	DB01435	-	-
P35372	DB00684	-	-
P35372	DB01436	-	-
P35372	DB00999	-	-
P35372	DB00995	-	-
P35372	DB00994	-	-
P35372	DB00997	-	-
P35372	DB00996	-	-
P35372	DB00991	-	-
P35372	DB04552	-	-
P35372	DB04573	-	-
P35372	DB00780	-	-
P35372	DB01095	-	-
P35372	DB01094	-	-
P35372	DB01092	-	-
P35372	DB01091	-	-
P35372	DB00656	-	-
P35372	DB00655	-	-
P35372	DB00652	-	-
P35372	DB01099	-	-
P35372	DB00651	-	-
P35372	DB01253	-	-
P35372	DB00166	-	-
P35372	DB00788	-	-
P35372	DB00420	-	-
P35372	DB01380	-	-
P35372	DB00391	-	-
P35372	DB00928	-	-
P35372	DB00841	-	-
P35372	DB00934	-	-
P35372	DB00381	-	-
P35372	DB00382	-	-
P35372	DB00844	-	-
P35372	DB00920	-	-
P35372	DB00921	-	-
P35372	DB00848	-	-
P35372	DB00388	-	-
P35372	DB00389	-	-
P35372	DB00434	-	-
P35372	DB00396	-	-
P35372	DB01008	-	-
P35372	DB01009	-	-
P35372	DB00531	-	-
P35372	DB00537	-	-
P35372	DB01001	-	-
P35372	DB01002	-	-
P35372	DB01003	-	-
P35372	DB01005	-	-
P35372	DB01006	-	-
P35372	DB00541	-	-
P35372	DB00279	-	-
P35372	DB00274	-	-
P35372	DB00418	-	-
P35372	DB00277	-	-
P35372	DB00271	-	-
P35372	DB00376	-	-
P35372	DB00373	-	-
P35372	DB06800	-	-
P35372	DB00379	-	-
P35372	DB06150	-	-
P35372	DB01171	-	-
P35372	DB01172	-	-
P35372	DB01173	-	-
P35372	DB01174	-	-
P35372	DB01175	-	-
P35372	DB01176	-	-
P35372	DB01177	-	-
P35372	DB01179	-	-
P35372	DB00413	-	-
P35372	DB00970	-	-
P35372	DB00977	-	-
P35372	DB00975	-	-
P35372	DB00502	-	-
P35372	DB00503	-	-
P35372	DB00500	-	-
P35372	DB00978	-	-
P35372	DB01581	-	-
P35372	DB00504	-	-
P35372	DB01582	-	-
P35372	DB01053	-	-
P35372	DB00698	-	-
P35372	DB01050	-	-
P35372	DB01056	-	-
P35372	DB01055	-	-
P35372	DB01054	-	-
P35372	DB00692	-	-
P35372	DB01351	-	-
P35372	DB01059	-	-
P35372	DB01058	-	-
P35372	DB01426	-	-
P35372	DB01427	-	-
P35372	DB00694	-	-
P35372	DB00695	-	-
P35372	DB00987	-	-
P35372	DB00982	-	-
P35372	DB00981	-	-
P35372	DB00591	-	-
P35372	DB00590	-	-
P35372	DB00593	-	-
P35372	DB00595	-	-
P35372	DB00598	-	-
P35372	DB00778	-	-
P35372	DB00809	-	-
P35372	DB00808	-	-
P35372	DB00807	-	-
P35372	DB00806	-	-
P35372	DB00773	-	-
P35372	DB00804	-	-
P35372	DB00802	-	-
P35372	DB00776	-	-
P35372	DB00477	-	-
P35372	DB00472	-	-
P35372	DB00471	-	-
P35372	DB00577	-	-
P35372	DB00576	-	-
P35372	DB00575	-	-
P35372	DB00573	-	-
P35372	DB00572	-	-
P35372	DB00571	-	-
P35372	DB00479	-	-
P35372	DB00186	-	-
P35372	DB00187	-	-
P35372	DB00184	-	-
P35372	DB00180	-	-
P35372	DB00181	-	-
P35372	DB00870	-	-
P35372	DB00871	-	-
P35372	DB00877	-	-
P35372	DB00874	-	-
P35372	DB01128	-	-
P35372	DB06204	-	-
P35372	DB01121	-	-
P35372	DB01120	-	-
P35372	DB01127	-	-
P35372	DB01125	-	-
P35372	DB00330	-	-
P35372	DB00445	-	-
P35372	DB00238	-	-
P35372	DB00239	-	-
P35372	DB00443	-	-
P35372	DB00145	-	-
P35372	DB00235	-	-
P35372	DB00600	-	-
P35372	DB00602	-	-
P35372	DB00604	-	-
P35372	DB01224	-	-
P35372	DB01221	-	-
P35372	DB01222	-	-
P35372	DB01223	-	-
P35372	DB00898	-	-
P35372	DB00482	-	-
P35372	DB00936	-	-
P35372	DB00956	-	-
P35372	DB01339	-	-
P35372	DB00730	-	-
P35372	DB01148	-	-
P35372	DB01147	-	-
P35372	DB01143	-	-
P35372	DB01142	-	-
P35372	DB01082	-	-
P35372	DB00839	-	-
P35372	DB01086	-	-
P35372	DB01087	-	-
P35372	DB00623	-	-
P35372	DB00620	-	-
P35372	DB00627	-	-
P35372	DB00624	-	-
P35372	DB01242	-	-
P35372	DB01243	-	-
P35372	DB01241	-	-
P35372	DB01248	-	-
P35372	DB01394	-	-
P35372	DB01396	-	-
P35372	DB06148	-	-
P35372	DB00169	-	-
P35372	DB01392	-	-
P35372	DB01393	-	-
P35372	DB06147	-	-
P35372	DB01399	-	-
P35372	DB00818	-	-
P35372	DB00819	-	-
P35372	DB00762	-	-
P35372	DB00763	-	-
P35372	DB00812	-	-
P35372	DB00813	-	-
P35372	DB00814	-	-
P35372	DB00765	-	-
P35372	DB00568	-	-
P35372	DB00401	-	-
P35372	DB00400	-	-
P35372	DB00406	-	-
P35372	DB00404	-	-
P35372	DB00561	-	-
P35372	DB00563	-	-
P35372	DB00564	-	-
P35372	DB04841	-	-
P35372	DB00567	-	-
P35372	DB00759	-	-
P35372	DB00696	-	-
P35372	DB00884	-	-
P35372	DB00968	-	-
P35372	DB00969	-	-
P35372	DB00881	-	-
P35372	DB00967	-	-
P35372	DB00960	-	-
P35372	DB00961	-	-
P35372	DB00889	-	-
P35372	DB00963	-	-
P35372	DB06729	-	-
P35372	DB00249	-	-
P35372	DB00717	-	-
P35372	DB00715	-	-
P35372	DB00242	-	-
P35372	DB00245	-	-
P35372	DB00712	-	-
P35372	DB00247	-	-
P35372	DB00367	-	-
P35372	DB00365	-	-
P35372	DB00363	-	-
P35372	DB00361	-	-
P35372	DB01024	-	-
P35372	DB00368	-	-
P35372	DB03166	-	-
P35372	DB00611	-	-
P35372	DB00614	-	-
P35372	DB00615	-	-
P35372	DB01211	-	-
P35372	DB01210	-	-
P35372	DB01213	-	-
P35372	DB00619	-	-
P35372	DB01217	-	-
P35372	DB01216	-	-
P35372	DB06698	-	-
P35372	DB01188	-	-
P35372	DB01627	-	-
P35372	DB01181	-	-
P35372	DB06691	-	-
P35372	DB01183	-	-
P35372	DB01182	-	-
P35372	DB01184	-	-
P35372	DB01186	-	-
P35372	DB00685	-	-
P35372	DB00811	-	-
P35372	DB01029	-	-
P35372	DB00760	-	-
P35372	DB08807	-	-
P35372	DB04838	-	-
P35372	DB01599	-	-
P35372	DB01044	-	-
P35372	DB01045	-	-
P35372	DB00104	-	-
P35372	DB01595	-	-
P35372	DB01041	-	-
P35372	DB01042	-	-
P35372	DB00661	-	-
P35372	DB00669	-	-
P35372	DB00668	-	-
P35372	DB00583	-	-
P35372	DB00586	-	-
P35372	DB00584	-	-
P35372	DB00585	-	-
P35372	DB08797	-	-
P35372	DB00589	-	-
P35372	DB00339	-	-
P35372	DB00724	-	-
P35372	DB00725	-	-
P35372	DB00722	-	-
P35372	DB00721	-	-
P35372	DB00331	-	-
P35372	DB00446	-	-
P35372	DB00333	-	-
P35372	DB00335	-	-
P35372	DB00334	-	-
P35372	DB00441	-	-
P35372	DB01168	-	-
P35372	DB01136	-	-
P35372	DB01137	-	-
P35372	DB01132	-	-
P35372	DB01206	-	-
P35372	DB00800	-	-
P35372	DB00207	-	-
P35372	DB00206	-	-
P35372	DB00201	-	-
P35372	DB00202	-	-
P35372	DB00208	-	-
P35372	DB06770	-	-
P35372	DB00714	-	-
P37231	-	TAXID:65948	Apigenin
P37231	-	TAXID:74900	Kaempferol
P37231	-	TAXID:51240	Palmitoleic Acid
P37231	-	TAXID:4081	Naringenin
P37231	-	TAXID:4222	Acacetin
P37231	-	TAXID:4222	Alpha-Linolenic Acid
P37231	-	TAXID:4577	Chrysoeriol
P37231	-	TAXID:4577	Naringenin
P37231	-	TAXID:4577	Kaempferol
P37231	-	TAXID:36610	Apigenin
P37231	-	TAXID:36610	Kaempferol
P37231	-	TAXID:36610	Chrysoeriol
P37231	-	TAXID:4006	Alpha-Linolenic Acid
P37231	-	TAXID:175228	Syringetin
P37231	-	TAXID:4045	Apigenin
P37231	-	TAXID:4045	Kaempferol
P37231	-	TAXID:4045	Chrysoeriol
P37231	-	TAXID:4679	Kaempferol
P37231	-	TAXID:4047	Kaempferol
P37231	-	TAXID:78168	Apigenin
P37231	-	TAXID:4530	Linoleic
P37231	-	TAXID:4530	Kaempferol
P37231	-	TAXID:4681	Kaempferol
P37231	-	TAXID:48038	Kaempferol
P37231	-	TAXID:89151	Apigenin
P37231	-	TAXID:3760	Hesperetin
P37231	-	TAXID:4146	Apigenin
P37231	-	TAXID:4146	Diosmetin
P37231	-	TAXID:4146	Kaempferol
P37231	-	TAXID:4146	Chrysoeriol
P37231	-	TAXID:3469	Kaempferol
P37231	-	TAXID:29780	Kaempferol
P37231	-	TAXID:3747	Naringenin
P37231	-	TAXID:3747	Kaempferol
P37231	-	TAXID:3708	Naringenin
P37231	-	TAXID:3708	Kaempferol
P37231	-	TAXID:32247	Kaempferol
P37231	-	TAXID:171929	Linoleic
P37231	-	TAXID:49827	Formononetin
P37231	-	TAXID:49827	Naringenin
P37231	-	TAXID:35925	Kaempferol
P37231	-	TAXID:3888	Formononetin
P37231	-	TAXID:3888	Naringenin
P37231	-	TAXID:3888	Pseudobaptigenin
P37231	-	TAXID:3888	Kaempferol
P37231	-	TAXID:3888	Daidzein
P37231	-	TAXID:4565	Formononetin
P37231	-	TAXID:94328	Apigenin
P37231	-	TAXID:4236	Gemfibrozil
P37231	-	TAXID:4236	Alpha-Linolenic Acid
P37231	-	TAXID:151069	Kaempferol
P37231	-	TAXID:3649	Daidzein
P37231	-	TAXID:3712	Kaempferol
P37231	-	TAXID:180772	Kaempferol
P37231	-	TAXID:4072	Apigenin
P37231	-	TAXID:4072	Chrysoeriol
P37231	-	TAXID:4442	Genistein
P37231	-	TAXID:4442	Hesperetin
P37231	-	TAXID:4442	Kaempferol
P37231	-	TAXID:4442	Apigenin
P37231	-	TAXID:4442	Daidzein
P37231	-	TAXID:4442	Naringenin
P37231	-	TAXID:120290	Naringenin
P37231	-	TAXID:120290	Kaempferol
P37231	-	TAXID:74645	Kaempferol
P37231	-	TAXID:3847	Genistein
P37231	-	TAXID:3847	Linoleic
P37231	-	TAXID:3847	Kaempferol
P37231	-	TAXID:3847	Apigenin
P37231	-	TAXID:3847	Daidzein
P37231	-	TAXID:3847	Naringenin
P37231	-	TAXID:3847	74-Dihydroxyflavone
P37231	-	TAXID:3711	Alpha-Linolenic Acid
P37231	-	TAXID:3711	Linoleic
P37231	-	TAXID:3711	Kaempferol
P37231	-	TAXID:3659	Kaempferol
P37231	-	TAXID:50225	Chrysoeriol
P37231	DB00834	-	-
P37231	DB01094	-	-
P37231	DB00784	-	-
P37231	DB01092	-	-
P37231	DB00421	-	-
P37231	DB00390	-	-
P37231	DB00396	-	-
P37231	DB00258	-	-
P37231	DB00783	-	-
P37231	DB00255	-	-
P37231	DB00313	-	-
P37231	DB00091	-	-
P37231	DB00159	-	-
P37231	DB00945	-	-
P37231	DB00384	-	-
P37231	DB00140	-	-
P37231	DB00382	-	-
P37231	DB00925	-	-
P37231	DB00624	-	-
P37231	DB01241	-	-
P37231	DB00307	-	-
P37231	DB00738	-	-
P37231	DB00227	-	-
P37231	DB00220	-	-
P37231	DB01394	-	-
P37231	DB01396	-	-
P37231	DB01393	-	-
P37231	DB06710	-	-
P37231	DB03255	-	-
P37231	DB00970	-	-
P37231	DB00811	-	-
P37231	DB00795	-	-
P37231	DB00400	-	-
P37231	DB00675	-	-
P37231	DB00563	-	-
P37231	DB01229	-	-
P37231	DB00375	-	-
P37231	DB00882	-	-
P37231	DB00966	-	-
P37231	DB00166	-	-
P37231	DB01069	-	-
P37231	DB00648	-	-
P37231	DB00162	-	-
P37231	DB00415	-	-
P37231	DB00168	-	-
P37231	DB00169	-	-
P37231	DB00412	-	-
P37231	DB00554	-	-
P37231	DB00550	-	-
P37231	DB01024	-	-
P37231	DB00482	-	-
P37231	DB00481	-	-
P37231	DB03166	-	-
P37231	DB01100	-	-
P37231	DB00509	-	-
P37231	DB06689	-	-
P37231	DB00615	-	-
P37231	DB00507	-	-
P37231	DB00698	-	-
P37231	DB01050	-	-
P37231	DB01346	-	-
P37231	DB06691	-	-
P37231	DB01420	-	-
P37231	DB00468	-	-
P37231	DB00694	-	-
P37231	DB00682	-	-
P37231	DB00982	-	-
P37231	DB00595	-	-
P37231	DB01115	-	-
P37231	DB01045	-	-
P37231	DB00772	-	-
P37231	DB01042	-	-
P37231	DB00815	-	-
P37231	DB00661	-	-
P37231	DB00571	-	-
P37231	DB00262	-	-
P37231	DB00586	-	-
P37231	DB00406	-	-
P37231	DB00928	-	-
P37231	DB00636	-	-
P37231	DB01127	-	-
P37231	DB00523	-	-
P37231	DB01232	-	-
P37231	DB00132	-	-
P37231	DB00445	-	-
P37231	DB01039	-	-
P37231	DB00238	-	-
P37231	DB00235	-	-
P37231	DB00903	-	-
P37231	DB01132	-	-
P37231	DB00908	-	-
P37231	DB01026	-	-
P37231	DB01438	-	-
P37231	DB00328	-	-
P37231	DB00756	-	-
P37231	DB00755	-	-
P37231	DB00451	-	-
P37231	DB00321	-	-
P37231	DB00205	-	-
P37231	DB00206	-	-
P37231	DB00997	-	-
P31749	DB02546	-	-
P31749	DB00398	-	-
P31749	DB00317	-	-
P31749	DB06616	-	-
P31749	DB05294	-	-
P31749	DB00227	-	-
P31749	DB00685	-	-
P31749	DB06803	-	-
P31749	DB00619	-	-
P31749	DB06589	-	-
P31749	DB01268	-	-
P31749	DB01254	-	-
P31749	DB00530	-	-
P31749	DB01030	-	-
P31749	DB04868	-	-
P31749	DB01259	-	-
P31749	DB00877	-	-
P31749	DB08877	-	-
P10253	-	TAXID:65948	Luteolin
P10253	-	TAXID:65948	Caffeic Acid
P10253	-	TAXID:74900	Quercetin
P10253	-	TAXID:74900	Protocatechuic Acid
P10253	-	TAXID:74900	Spiraeoside
P10253	-	TAXID:74900	Caffeic Acid
P10253	-	TAXID:74900	Hyperin
P10253	-	TAXID:51240	Protocatechuic Acid
P10253	-	TAXID:51240	Caffeic Acid
P10253	-	TAXID:58860	(+)-Catechin
P10253	-	TAXID:4081	Quercetin
P10253	-	TAXID:4081	Phloretin
P10253	-	TAXID:4081	Piceid
P10253	-	TAXID:4081	Resveratrol
P10253	-	TAXID:4081	Kaempferol-3-O-Sophoroside
P10253	-	TAXID:4442	Luteolin
P10253	-	TAXID:4442	Orientin
P10253	-	TAXID:4442	Isovitexin
P10253	-	TAXID:4442	Schaftoside
[truncated: 4,283 more rows]

## Sheet: Immunological
Protein	Drug name	Plant source	Plant compound
P14780	-	TAXID:65948	Luteolin
P14780	-	TAXID:29760	Quercetin
P14780	-	TAXID:29760	(+)-Dihydromyricetin
P14780	-	TAXID:74900	Quercetin
P14780	-	TAXID:74900	Protocatechuic Acid
P14780	-	TAXID:51240	Protocatechuic Acid
P14780	-	TAXID:4081	Quercetin
P14780	-	TAXID:4442	Luteolin
P14780	-	TAXID:4442	Quercetin
P14780	-	TAXID:4442	Guaiacol
P14780	-	TAXID:4577	Quercetin
P14780	-	TAXID:36610	Luteolin
P14780	-	TAXID:36610	Quercetin
P14780	-	TAXID:4682	Quercetin
P14780	-	TAXID:3712	Quercetin
P14780	-	TAXID:114280	Quercetin
P14780	-	TAXID:114280	Protocatechuic Acid
P14780	-	TAXID:4045	Luteolin
P14780	-	TAXID:4045	Quercetin
P14780	-	TAXID:4679	Quercetin
P14780	-	TAXID:4679	Protocatechuic Acid
P14780	-	TAXID:4679	Taxifolin
P14780	-	TAXID:4047	Luteolin
P14780	-	TAXID:4047	Quercetin
P14780	-	TAXID:78168	Luteolin
P14780	-	TAXID:4530	Quercetin
P14780	-	TAXID:4530	Guaiacol
P14780	-	TAXID:4202	(+)-Dihydromyricetin
P14780	-	TAXID:4681	Quercetin
P14780	-	TAXID:4681	Protocatechuic Acid
P14780	-	TAXID:175228	Quercetin
P14780	-	TAXID:175228	Protocatechuic Acid
P14780	-	TAXID:175228	Taxifolin
P14780	-	TAXID:3635	Guaiacol
P14780	-	TAXID:32224	Protocatechuic Acid
P14780	-	TAXID:4146	Luteolin
P14780	-	TAXID:4146	Quercetin
P14780	-	TAXID:13731	Guaiacol
P14780	-	TAXID:3469	Quercetin
P14780	-	TAXID:3864	Luteolin
P14780	-	TAXID:3621	Protocatechuic Acid
P14780	-	TAXID:29780	Quercetin
P14780	-	TAXID:29780	Protocatechuic Acid
P14780	-	TAXID:3747	Quercetin
P14780	-	TAXID:3747	Guaiacol
P14780	-	TAXID:3747	Protocatechuic Acid
P14780	-	TAXID:3708	Luteolin
P14780	-	TAXID:3708	Quercetin
P14780	-	TAXID:120290	Quercetin
P14780	-	TAXID:32247	Quercetin
P14780	-	TAXID:157791	Isoliquiritigenin
P14780	-	TAXID:157791	Liquiritigenin
P14780	-	TAXID:171929	Guaiacol
P14780	-	TAXID:49827	Isoliquiritigenin
P14780	-	TAXID:49827	Liquiritigenin
P14780	-	TAXID:35925	Quercetin
P14780	-	TAXID:3888	Quercetin
P14780	-	TAXID:3888	Liquiritigenin
P14780	-	TAXID:4565	Quercetin
P14780	-	TAXID:4565	Guaiacol
P14780	-	TAXID:3983	Protocatechuic Acid
P14780	-	TAXID:4236	Pyrocatechol
P14780	-	TAXID:4236	Quercetin
P14780	-	TAXID:151069	Protocatechuic Acid
P14780	-	TAXID:151069	Taxifolin
P14780	-	TAXID:41241	Procyanidin C1
P14780	-	TAXID:3885	Quercetin
P14780	-	TAXID:50225	Luteolin
P14780	-	TAXID:50225	Quercetin
P14780	-	TAXID:4072	Luteolin
P14780	-	TAXID:4072	Quercetin
P14780	-	TAXID:180772	Quercetin
P14780	-	TAXID:13427	Quercetin
P14780	-	TAXID:4222	Luteolin
P14780	-	TAXID:4222	Quercetin
P14780	-	TAXID:13216	Pyrocatechol
P14780	-	TAXID:48038	Luteolin
P14780	-	TAXID:48038	Quercetin
P14780	-	TAXID:74645	Quercetin
P14780	-	TAXID:22663	Quercetin
P14780	-	TAXID:3847	Quercetin
P14780	-	TAXID:3847	Isoliquiritigenin
P14780	-	TAXID:3847	Liquiritigenin
P14780	-	TAXID:3711	Quercetin
P14780	-	TAXID:3659	Quercetin
P14780	-	TAXID:3617	Quercetin
P14780	-	TAXID:4113	Protocatechuic Acid
P14780	-	TAXID:4111	Guaiacol
P14780	DB01064	-	-
P14780	DB01097	-	-
P14780	DB00153	-	-
P14780	DB00709	-	-
P14780	DB00258	-	-
P14780	DB00259	-	-
P14780	DB00252	-	-
P14780	DB00701	-	-
P14780	DB00251	-	-
P14780	DB00704	-	-
P14780	DB00257	-	-
P14780	DB00254	-	-
P14780	DB00255	-	-
P14780	DB00313	-	-
P14780	DB00310	-	-
P14780	DB00316	-	-
P14780	DB00091	-	-
P14780	DB00319	-	-
P14780	DB00478	-	-
P14780	DB00570	-	-
P14780	DB00882	-	-
P14780	DB01156	-	-
P14780	DB01151	-	-
P14780	DB00650	-	-
P14780	DB00227	-	-
P14780	DB00224	-	-
P14780	DB00222	-	-
P14780	DB00220	-	-
P14780	DB00962	-	-
P14780	DB06710	-	-
P14780	DB03255	-	-
P14780	DB00178	-	-
P14780	DB01075	-	-
P14780	DB01074	-	-
P14780	DB01077	-	-
P14780	DB01076	-	-
P14780	DB00672	-	-
P14780	DB00674	-	-
P14780	DB00675	-	-
P14780	DB00679	-	-
P14780	DB01275	-	-
P14780	DB00795	-	-
P14780	DB00794	-	-
P14780	DB00793	-	-
P14780	DB00823	-	-
P14780	DB00822	-	-
P14780	DB00415	-	-
P14780	DB00829	-	-
P14780	DB00411	-	-
P14780	DB00412	-	-
P14780	DB00798	-	-
P14780	DB00555	-	-
P14780	DB00554	-	-
P14780	DB00551	-	-
P14780	DB00550	-	-
P14780	DB00553	-	-
P14780	DB00959	-	-
P14780	DB00489	-	-
P14780	DB00488	-	-
P14780	DB00483	-	-
P14780	DB00950	-	-
P14780	DB00481	-	-
P14780	DB00487	-	-
P14780	DB00484	-	-
P14780	DB01103	-	-
P14780	DB01105	-	-
P14780	DB01104	-	-
P14780	DB00214	-	-
P14780	DB00215	-	-
P14780	DB00359	-	-
P14780	DB00357	-	-
P14780	DB00356	-	-
P14780	DB00353	-	-
P14780	DB00350	-	-
P14780	DB01208	-	-
P14780	DB01203	-	-
P14780	DB01200	-	-
P14780	DB01201	-	-
P14780	DB01611	-	-
P14780	DB01204	-	-
P14780	DB01205	-	-
P14780	DB01199	-	-
P14780	DB01193	-	-
P14780	DB01190	-	-
P14780	DB01191	-	-
P14780	DB01197	-	-
P14780	DB01296	-	-
P14780	DB01299	-	-
P14780	DB00915	-	-
P14780	DB00384	-	-
P14780	DB00916	-	-
P14780	DB00911	-	-
P14780	DB00529	-	-
P14780	DB00524	-	-
P14780	DB00525	-	-
P14780	DB00919	-	-
P14780	DB00523	-	-
P14780	DB01035	-	-
P14780	DB01037	-	-
P14780	DB01408	-	-
P14780	DB01030	-	-
P14780	DB01032	-	-
P14780	DB01406	-	-
P14780	DB01407	-	-
P14780	DB01400	-	-
P14780	DB00846	-	-
P14780	DB01039	-	-
P14780	DB00951	-	-
P14780	DB00421	-	-
P14780	DB00285	-	-
P14780	DB00284	-	-
P14780	DB00281	-	-
P14780	DB00283	-	-
P14780	DB00437	-	-
P14780	DB00328	-	-
P14780	DB00750	-	-
P14780	DB00756	-	-
P14780	DB00755	-	-
P14780	DB00322	-	-
P14780	DB00320	-	-
P14780	DB00758	-	-
P14780	DB00455	-	-
P14780	DB00324	-	-
P14780	DB00457	-	-
P14780	DB04571	-	-
P14780	DB00420	-	-
P14780	DB00859	-	-
P14780	DB00857	-	-
P14780	DB00850	-	-
P14780	DB00851	-	-
P14780	DB00780	-	-
P14780	DB00428	-	-
P14780	DB00834	-	-
P14780	DB00783	-	-
P14780	DB00784	-	-
P14780	DB00786	-	-
P14780	DB00831	-	-
P14780	DB00393	-	-
P14780	DB00936	-	-
P14780	DB00935	-	-
P14780	DB00390	-	-
P14780	DB00424	-	-
P14780	DB00394	-	-
P14780	DB00547	-	-
P14780	DB00544	-	-
P14780	DB00542	-	-
P14780	DB00543	-	-
P14780	DB00540	-	-
P14780	DB01018	-	-
P14780	DB01016	-	-
P14780	DB01015	-	-
P14780	DB01014	-	-
P14780	DB01011	-	-
P14780	DB00549	-	-
P14780	DB00233	-	-
P14780	DB00495	-	-
P14780	DB00490	-	-
P14780	DB00493	-	-
P14780	DB08826	-	-
P14780	DB00498	-	-
P14780	DB00499	-	-
P14780	DB00321	-	-
P14780	DB00945	-	-
P14780	DB00734	-	-
P14780	DB00731	-	-
P14780	DB00309	-	-
P14780	DB00733	-	-
P14780	DB00305	-	-
P14780	DB00738	-	-
P14780	DB00302	-	-
P14780	DB01606	-	-
P14780	DB01167	-	-
P14780	DB01166	-	-
P14780	DB01165	-	-
P14780	DB01162	-	-
P14780	DB00426	-	-
P14780	DB01168	-	-
P14780	DB01287	-	-
P14780	DB06697	-	-
P14780	DB01068	-	-
P14780	DB01069	-	-
P14780	DB00649	-	-
P14780	DB00648	-	-
P14780	DB00163	-	-
P14780	DB01062	-	-
P14780	DB01060	-	-
P14780	DB01061	-	-
P14780	DB00641	-	-
P14780	DB01067	-	-
P14780	DB00643	-	-
P14780	DB01065	-	-
P14780	DB01357	-	-
P14780	DB00749	-	-
P14780	DB00298	-	-
P14780	DB00744	-	-
P14780	DB00297	-	-
P14780	DB00740	-	-
P14780	DB00741	-	-
P14780	DB00742	-	-
P14780	DB00291	-	-
P14780	DB00465	-	-
P14780	DB00450	-	-
P14780	DB00467	-	-
P14780	DB00461	-	-
P14780	DB00462	-	-
P14780	DB00469	-	-
P14780	DB00452	-	-
P14780	DB00196	-	-
P14780	DB00190	-	-
P14780	DB00193	-	-
P14780	DB00199	-	-
P14780	DB00861	-	-
P14780	DB00860	-	-
P14780	DB00863	-	-
P14780	DB00325	-	-
P14780	DB00864	-	-
P14780	DB01113	-	-
P14780	DB01110	-	-
P14780	DB01114	-	-
P14780	DB01115	-	-
P14780	DB00177	-	-
P14780	DB01118	-	-
P14780	DB01119	-	-
P14780	DB00175	-	-
P14780	DB00263	-	-
P14780	DB00262	-	-
P14780	DB00266	-	-
P14780	DB00265	-	-
P14780	DB00264	-	-
P14780	DB00342	-	-
P14780	DB00343	-	-
P14780	DB00347	-	-
P14780	DB00423	-	-
P14780	DB00635	-	-
P14780	DB00636	-	-
P14780	DB00637	-	-
P14780	DB00630	-	-
P14780	DB01233	-	-
P14780	DB01232	-	-
P14780	DB01231	-	-
P14780	DB01235	-	-
P14780	DB01234	-	-
P14780	DB00104	-	-
P14780	DB00518	-	-
P14780	DB00904	-	-
P14780	DB01047	-	-
P14780	DB00903	-	-
P14780	DB00513	-	-
P14780	DB00512	-	-
P14780	DB00515	-	-
P14780	DB00514	-	-
P14780	DB01026	-	-
P14780	DB00688	-	-
P14780	DB00122	-	-
P14780	DB01023	-	-
P14780	DB00126	-	-
P14780	DB01021	-	-
P14780	DB00681	-	-
P14780	DB00682	-	-
P14780	DB01435	-	-
P14780	DB00684	-	-
P14780	DB01436	-	-
P14780	DB00999	-	-
P14780	DB00995	-	-
P14780	DB00994	-	-
P14780	DB00997	-	-
P14780	DB00996	-	-
P14780	DB00991	-	-
P14780	DB04552	-	-
P14780	DB04573	-	-
P14780	DB00836	-	-
P14780	DB01095	-	-
P14780	DB01092	-	-
P14780	DB01091	-	-
P14780	DB00656	-	-
P14780	DB00655	-	-
P14780	DB01099	-	-
P14780	DB00651	-	-
P14780	DB01253	-	-
P14780	DB00166	-	-
P14780	DB00939	-	-
P14780	DB00788	-	-
P14780	DB00789	-	-
P14780	DB01380	-	-
P14780	DB00391	-	-
P14780	DB00928	-	-
P14780	DB00841	-	-
P14780	DB00934	-	-
P14780	DB00381	-	-
P14780	DB00382	-	-
P14780	DB00844	-	-
P14780	DB00920	-	-
P14780	DB00433	-	-
P14780	DB00848	-	-
P14780	DB00389	-	-
P14780	DB00434	-	-
P14780	DB00396	-	-
P14780	DB01008	-	-
P14780	DB01009	-	-
P14780	DB00531	-	-
P14780	DB00537	-	-
P14780	DB01001	-	-
P14780	DB01002	-	-
P14780	DB01003	-	-
P14780	DB01005	-	-
P14780	DB01006	-	-
P14780	DB00541	-	-
P14780	DB00279	-	-
P14780	DB00274	-	-
P14780	DB00418	-	-
P14780	DB00277	-	-
P14780	DB00271	-	-
P14780	DB00376	-	-
P14780	DB00373	-	-
P14780	DB00379	-	-
P14780	DB06150	-	-
P14780	DB01171	-	-
P14780	DB01172	-	-
P14780	DB01173	-	-
P14780	DB01174	-	-
P14780	DB01175	-	-
P14780	DB01176	-	-
P14780	DB01177	-	-
P14780	DB01179	-	-
P14780	DB00970	-	-
P14780	DB00977	-	-
P14780	DB00975	-	-
P14780	DB00502	-	-
P14780	DB00503	-	-
P14780	DB00500	-	-
P14780	DB00978	-	-
P14780	DB01581	-	-
P14780	DB01582	-	-
P14780	DB01053	-	-
P14780	DB00698	-	-
P14780	DB01050	-	-
P14780	DB01056	-	-
P14780	DB01055	-	-
P14780	DB01054	-	-
P14780	DB00692	-	-
P14780	DB01351	-	-
P14780	DB01059	-	-
P14780	DB01058	-	-
P14780	DB00696	-	-
P14780	DB01427	-	-
P14780	DB00694	-	-
P14780	DB00695	-	-
P14780	DB00987	-	-
P14780	DB00982	-	-
P14780	DB00981	-	-
P14780	DB00591	-	-
P14780	DB00590	-	-
P14780	DB00593	-	-
P14780	DB00595	-	-
P14780	DB00598	-	-
P14780	DB00778	-	-
P14780	DB00809	-	-
P14780	DB00808	-	-
P14780	DB00807	-	-
P14780	DB00806	-	-
P14780	DB00773	-	-
P14780	DB00804	-	-
P14780	DB00776	-	-
P14780	DB00477	-	-
P14780	DB00472	-	-
P14780	DB00471	-	-
P14780	DB00577	-	-
P14780	DB00576	-	-
P14780	DB00575	-	-
P14780	DB00573	-	-
P14780	DB00572	-	-
P14780	DB00571	-	-
P14780	DB00479	-	-
P14780	DB00186	-	-
P14780	DB00187	-	-
P14780	DB00184	-	-
P14780	DB00180	-	-
P14780	DB00181	-	-
P14780	DB00878	-	-
P14780	DB00871	-	-
P14780	DB00877	-	-
P14780	DB00874	-	-
P14780	DB01128	-	-
P14780	DB01121	-	-
P14780	DB01120	-	-
P14780	DB01127	-	-
P14780	DB01125	-	-
P14780	DB00330	-	-
P14780	DB00238	-	-
P14780	DB00239	-	-
P14780	DB00443	-	-
P14780	DB01087	-	-
P14780	DB00235	-	-
P14780	DB00600	-	-
P14780	DB00602	-	-
P14780	DB00604	-	-
P14780	DB01224	-	-
P14780	DB01221	-	-
P14780	DB01222	-	-
P14780	DB01223	-	-
P14780	DB00898	-	-
P14780	DB00482	-	-
P14780	DB01339	-	-
P14780	DB00730	-	-
P14780	DB01148	-	-
P14780	DB01147	-	-
P14780	DB01143	-	-
P14780	DB01142	-	-
P14780	DB01082	-	-
P14780	DB00839	-	-
P14780	DB01086	-	-
P14780	DB00145	-	-
P14780	DB00623	-	-
P14780	DB00620	-	-
P14780	DB00627	-	-
P14780	DB00624	-	-
P14780	DB01242	-	-
P14780	DB01241	-	-
P14780	DB01248	-	-
P14780	DB01394	-	-
P14780	DB01396	-	-
P14780	DB06148	-	-
P14780	DB00169	-	-
P14780	DB01392	-	-
P14780	DB01393	-	-
P14780	DB06147	-	-
P14780	DB01399	-	-
P14780	DB00818	-	-
P14780	DB00819	-	-
P14780	DB00762	-	-
P14780	DB00763	-	-
P14780	DB00812	-	-
P14780	DB00814	-	-
P14780	DB00765	-	-
P14780	DB00568	-	-
P14780	DB00401	-	-
P14780	DB00400	-	-
P14780	DB00406	-	-
P14780	DB00404	-	-
P14780	DB00561	-	-
P14780	DB00563	-	-
P14780	DB00564	-	-
P14780	DB04841	-	-
P14780	DB00567	-	-
P14780	DB00759	-	-
P14780	DB01426	-	-
P14780	DB00884	-	-
P14780	DB00968	-	-
P14780	DB00969	-	-
P14780	DB00881	-	-
P14780	DB00967	-	-
P14780	DB00960	-	-
P14780	DB00961	-	-
P14780	DB00889	-	-
P14780	DB00963	-	-
P14780	DB06729	-	-
P14780	DB00249	-	-
P14780	DB00717	-	-
P14780	DB00715	-	-
P14780	DB00242	-	-
P14780	DB00245	-	-
P14780	DB00712	-	-
P14780	DB00247	-	-
P14780	DB00367	-	-
P14780	DB00365	-	-
P14780	DB00363	-	-
P14780	DB00361	-	-
P14780	DB01024	-	-
P14780	DB03166	-	-
P14780	DB00614	-	-
P14780	DB00615	-	-
P14780	DB01211	-	-
P14780	DB01210	-	-
P14780	DB01213	-	-
P14780	DB00619	-	-
P14780	DB01217	-	-
P14780	DB01216	-	-
P14780	DB06698	-	-
P14780	DB01188	-	-
P14780	DB01627	-	-
P14780	DB01181	-	-
P14780	DB06691	-	-
P14780	DB01183	-	-
P14780	DB01182	-	-
P14780	DB01184	-	-
P14780	DB01186	-	-
P14780	DB00685	-	-
P14780	DB00811	-	-
P14780	DB01029	-	-
P14780	DB00760	-	-
P14780	DB08807	-	-
P14780	DB04838	-	-
P14780	DB01599	-	-
P14780	DB01044	-	-
P14780	DB01045	-	-
P14780	DB01229	-	-
P14780	DB01595	-	-
P14780	DB01041	-	-
P14780	DB01042	-	-
P14780	DB00661	-	-
P14780	DB00669	-	-
P14780	DB00668	-	-
P14780	DB00583	-	-
P14780	DB00586	-	-
P14780	DB00584	-	-
P14780	DB00585	-	-
P14780	DB08797	-	-
P14780	DB00589	-	-
P14780	DB00339	-	-
P14780	DB00724	-	-
P14780	DB00725	-	-
P14780	DB00722	-	-
P14780	DB00720	-	-
P14780	DB00721	-	-
P14780	DB00331	-	-
P14780	DB00446	-	-
P14780	DB00445	-	-
P14780	DB00335	-	-
P14780	DB00334	-	-
P14780	DB00441	-	-
P14780	DB01136	-	-
P14780	DB01137	-	-
P14780	DB01132	-	-
P14780	DB01206	-	-
P14780	DB00207	-	-
P14780	DB00206	-	-
P14780	DB00201	-	-
P14780	DB00202	-	-
P14780	DB00208	-	-
P14780	DB06770	-	-
P41145	-	TAXID:65948	Apigenin
P41145	-	TAXID:74900	Hyperin
P41145	-	TAXID:51240	(-)-Epigallocatechin
P41145	-	TAXID:58860	(+)-Catechin
P41145	-	TAXID:4081	Naringenin
P41145	-	TAXID:4442	(-)-Epigallocatechin
P41145	-	TAXID:4442	Hesperetin
P41145	-	TAXID:4442	(+)-Catechin
P41145	-	TAXID:4442	Apigenin
P41145	-	TAXID:4442	Daidzein
P41145	-	TAXID:4442	Epicatechin Gallate
P41145	-	TAXID:4442	Naringenin
P41145	-	TAXID:4577	Naringenin
P41145	-	TAXID:36610	Apigenin
P41145	-	TAXID:36610	Hyperin
P41145	-	TAXID:4513	(+)-Catechin
P41145	-	TAXID:4679	Taxifolin
P41145	-	TAXID:4047	Falcarindiol
P41145	-	TAXID:78168	Apigenin
P41145	-	TAXID:175228	Taxifolin
P41145	-	TAXID:89151	Apigenin
P41145	-	TAXID:3760	Hesperetin
P41145	-	TAXID:32224	(+)-Catechin
P41145	-	TAXID:32224	(-)-Epigallocatechin
P41145	-	TAXID:4146	Apigenin
P41145	-	TAXID:4045	Apigenin
P41145	-	TAXID:4045	Hyperin
P41145	-	TAXID:3469	Tramadol
P41145	-	TAXID:3864	(+)-Catechin
P41145	-	TAXID:29760	(+)-Catechin
P41145	-	TAXID:29760	(-)-Epigallocatechin
P41145	-	TAXID:29780	(+)-Catechin
P41145	-	TAXID:29780	(-)-Epigallocatechin
P41145	-	TAXID:3649	Daidzein
P41145	-	TAXID:3747	(+)-Catechin
P41145	-	TAXID:3747	Naringenin
P41145	-	TAXID:3747	(-)-Epigallocatechin
P41145	-	TAXID:3708	Naringenin
P41145	-	TAXID:120290	(+)-Catechin
P41145	-	TAXID:120290	Naringenin
P41145	-	TAXID:120290	Hyperin
P41145	-	TAXID:40922	Falcarindiol
P41145	-	TAXID:4681	Hyperin
P41145	-	TAXID:49827	Naringenin
P41145	-	TAXID:35925	(+)-Catechin
P41145	-	TAXID:35925	(-)-Epigallocatechin
P41145	-	TAXID:3888	Naringenin
P41145	-	TAXID:3888	Daidzein
P41145	-	TAXID:94328	Apigenin
P41145	-	TAXID:151069	(+)-Catechin
P41145	-	TAXID:151069	Taxifolin
P41145	-	TAXID:41241	(+)-Catechin
P41145	-	TAXID:4072	Apigenin
P41145	-	TAXID:48038	Falcarindiol
P41145	-	TAXID:3847	(+)-Catechin
P41145	-	TAXID:3847	Apigenin
P41145	-	TAXID:3847	Naringenin
P41145	-	TAXID:3847	Daidzein
P41145	-	TAXID:74645	(+)-Catechin
P41145	-	TAXID:22663	(-)-Epigallocatechin
P41145	-	TAXID:3435	(+)-Catechin
P41145	-	TAXID:3617	(+)-Catechin
P41145	-	TAXID:4039	Falcarindiol
P41145	-	TAXID:4113	(+)-Catechin
P41145	-	TAXID:3641	(+)-Catechin
P41145	DB01064	-	-
P41145	DB01097	-	-
P41145	DB00153	-	-
P41145	DB00709	-	-
P41145	DB00258	-	-
P41145	DB00259	-	-
P41145	DB00252	-	-
P41145	DB00701	-	-
P41145	DB00251	-	-
P41145	DB00704	-	-
P41145	DB00257	-	-
P41145	DB00254	-	-
P41145	DB00255	-	-
P41145	DB00313	-	-
P41145	DB00310	-	-
P41145	DB00316	-	-
P41145	DB00091	-	-
P41145	DB00319	-	-
P41145	DB00318	-	-
P41145	DB00478	-	-
P41145	DB00570	-	-
P41145	DB00882	-	-
P41145	DB06274	-	-
P41145	DB01156	-	-
P41145	DB01151	-	-
P41145	DB00650	-	-
P41145	DB00227	-	-
P41145	DB00224	-	-
P41145	DB00222	-	-
P41145	DB00220	-	-
P41145	DB00962	-	-
P41145	DB06710	-	-
P41145	DB03255	-	-
P41145	DB00178	-	-
P41145	DB01075	-	-
P41145	DB01074	-	-
P41145	DB01077	-	-
P41145	DB01076	-	-
P41145	DB00672	-	-
P41145	DB00674	-	-
P41145	DB00675	-	-
P41145	DB00679	-	-
P41145	DB01275	-	-
P41145	DB00795	-	-
P41145	DB00794	-	-
P41145	DB00793	-	-
P41145	DB00823	-	-
P41145	DB00822	-	-
P41145	DB00415	-	-
P41145	DB00829	-	-
P41145	DB00411	-	-
P41145	DB00412	-	-
P41145	DB00798	-	-
P41145	DB00555	-	-
P41145	DB00554	-	-
P41145	DB00550	-	-
P41145	DB00553	-	-
P41145	DB00959	-	-
P41145	DB00489	-	-
P41145	DB00488	-	-
P41145	DB00483	-	-
P41145	DB00950	-	-
P41145	DB00481	-	-
P41145	DB00487	-	-
P41145	DB00484	-	-
P41145	DB01100	-	-
P41145	DB01103	-	-
P41145	DB01105	-	-
P41145	DB01104	-	-
P41145	DB00214	-	-
P41145	DB00215	-	-
P41145	DB00359	-	-
P41145	DB00357	-	-
P41145	DB00356	-	-
P41145	DB00353	-	-
P41145	DB00350	-	-
P41145	DB01208	-	-
P41145	DB01203	-	-
P41145	DB01200	-	-
P41145	DB01201	-	-
P41145	DB01611	-	-
P41145	DB01204	-	-
P41145	DB01205	-	-
P41145	DB01199	-	-
P41145	DB01193	-	-
P41145	DB01190	-	-
P41145	DB01191	-	-
P41145	DB01197	-	-
P41145	DB01299	-	-
P41145	DB00915	-	-
P41145	DB00384	-	-
P41145	DB00916	-	-
P41145	DB00911	-	-
P41145	DB00529	-	-
P41145	DB00524	-	-
P41145	DB00525	-	-
P41145	DB00919	-	-
P41145	DB00523	-	-
P41145	DB01035	-	-
P41145	DB01037	-	-
P41145	DB01408	-	-
P41145	DB01030	-	-
P41145	DB01032	-	-
P41145	DB01406	-	-
P41145	DB01407	-	-
P41145	DB01400	-	-
P41145	DB00846	-	-
P41145	DB01039	-	-
P41145	DB00951	-	-
P41145	DB00433	-	-
P41145	DB00421	-	-
P41145	DB00285	-	-
P41145	DB00284	-	-
P41145	DB00281	-	-
P41145	DB00283	-	-
P41145	DB00437	-	-
P41145	DB00328	-	-
P41145	DB00750	-	-
P41145	DB00756	-	-
P41145	DB00755	-	-
P41145	DB00322	-	-
P41145	DB00320	-	-
P41145	DB00758	-	-
P41145	DB00454	-	-
P41145	DB00327	-	-
P41145	DB00324	-	-
P41145	DB00457	-	-
P41145	DB04571	-	-
P41145	DB00859	-	-
P41145	DB00854	-	-
P41145	DB00857	-	-
P41145	DB00850	-	-
P41145	DB00851	-	-
P41145	DB00836	-	-
P41145	DB00428	-	-
P41145	DB00834	-	-
P41145	DB00783	-	-
P41145	DB00784	-	-
P41145	DB00939	-	-
P41145	DB00831	-	-
P41145	DB00393	-	-
P41145	DB00789	-	-
P41145	DB00935	-	-
P41145	DB00390	-	-
P41145	DB00424	-	-
P41145	DB00394	-	-
P41145	DB00547	-	-
P41145	DB00544	-	-
P41145	DB00542	-	-
P41145	DB00543	-	-
P41145	DB00540	-	-
P41145	DB01018	-	-
P41145	DB01016	-	-
P41145	DB01015	-	-
P41145	DB01014	-	-
P41145	DB01011	-	-
P41145	DB00549	-	-
P41145	DB00233	-	-
P41145	DB00495	-	-
P41145	DB00490	-	-
P41145	DB00493	-	-
P41145	DB08826	-	-
P41145	DB00498	-	-
P41145	DB00499	-	-
P41145	DB00321	-	-
P41145	DB00945	-	-
P41145	DB00734	-	-
P41145	DB00731	-	-
P41145	DB00309	-	-
P41145	DB00733	-	-
P41145	DB00305	-	-
P41145	DB00738	-	-
P41145	DB00302	-	-
P41145	DB01606	-	-
P41145	DB01167	-	-
P41145	DB01166	-	-
P41145	DB01165	-	-
P41145	DB01162	-	-
P41145	DB00426	-	-
P41145	DB01168	-	-
P41145	DB01287	-	-
P41145	DB06697	-	-
P41145	DB01068	-	-
P41145	DB01069	-	-
P41145	DB00649	-	-
P41145	DB00648	-	-
P41145	DB00163	-	-
P41145	DB01062	-	-
P41145	DB01060	-	-
P41145	DB01061	-	-
P41145	DB00641	-	-
P41145	DB01067	-	-
P41145	DB00643	-	-
P41145	DB01065	-	-
P41145	DB01357	-	-
P41145	DB00749	-	-
P41145	DB00298	-	-
P41145	DB00744	-	-
P41145	DB00297	-	-
P41145	DB00295	-	-
P41145	DB00740	-	-
P41145	DB00741	-	-
P41145	DB00742	-	-
P41145	DB00291	-	-
P41145	DB00465	-	-
P41145	DB00450	-	-
P41145	DB00467	-	-
P41145	DB00461	-	-
P41145	DB00462	-	-
P41145	DB00469	-	-
P41145	DB00452	-	-
P41145	DB00196	-	-
P41145	DB00190	-	-
P41145	DB00193	-	-
P41145	DB00199	-	-
P41145	DB00455	-	-
P41145	DB00861	-	-
P41145	DB00860	-	-
P41145	DB00863	-	-
P41145	DB00325	-	-
P41145	DB00864	-	-
P41145	DB01113	-	-
P41145	DB01110	-	-
P41145	DB01114	-	-
P41145	DB01115	-	-
P41145	DB00177	-	-
P41145	DB01118	-	-
P41145	DB01119	-	-
P41145	DB00175	-	-
P41145	DB00263	-	-
P41145	DB00262	-	-
P41145	DB00266	-	-
P41145	DB00265	-	-
P41145	DB00264	-	-
P41145	DB00342	-	-
P41145	DB00343	-	-
P41145	DB00347	-	-
P41145	DB00423	-	-
P41145	DB00635	-	-
P41145	DB00636	-	-
P41145	DB00637	-	-
P41145	DB00630	-	-
P41145	DB01233	-	-
P41145	DB01232	-	-
P41145	DB01231	-	-
P41145	DB01235	-	-
P41145	DB01234	-	-
P41145	DB00104	-	-
P41145	DB00518	-	-
P41145	DB00904	-	-
P41145	DB01047	-	-
P41145	DB00903	-	-
P41145	DB00513	-	-
P41145	DB00512	-	-
P41145	DB00515	-	-
P41145	DB00514	-	-
P41145	DB01026	-	-
P41145	DB00688	-	-
P41145	DB00122	-	-
P41145	DB01023	-	-
P41145	DB00126	-	-
P41145	DB01021	-	-
P41145	DB00681	-	-
P41145	DB00682	-	-
P41145	DB01435	-	-
P41145	DB00684	-	-
P41145	DB01436	-	-
P41145	DB00999	-	-
P41145	DB00995	-	-
P41145	DB00994	-	-
P41145	DB00997	-	-
P41145	DB00996	-	-
P41145	DB00991	-	-
P41145	DB04552	-	-
P41145	DB04573	-	-
P41145	DB00780	-	-
P41145	DB01095	-	-
P41145	DB01094	-	-
P41145	DB01092	-	-
P41145	DB01091	-	-
P41145	DB00656	-	-
P41145	DB00655	-	-
P41145	DB00652	-	-
P41145	DB01099	-	-
P41145	DB00651	-	-
P41145	DB01253	-	-
P41145	DB00166	-	-
P41145	DB00788	-	-
P41145	DB00420	-	-
P41145	DB01380	-	-
P41145	DB00391	-	-
P41145	DB00928	-	-
P41145	DB00841	-	-
P41145	DB00934	-	-
P41145	DB00381	-	-
P41145	DB00382	-	-
P41145	DB00844	-	-
P41145	DB00920	-	-
P41145	DB00921	-	-
P41145	DB00848	-	-
P41145	DB00389	-	-
P41145	DB00434	-	-
P41145	DB00396	-	-
P41145	DB01008	-	-
P41145	DB01009	-	-
P41145	DB00531	-	-
P41145	DB00537	-	-
P41145	DB01001	-	-
P41145	DB01002	-	-
P41145	DB01003	-	-
P41145	DB01005	-	-
P41145	DB01006	-	-
P41145	DB00541	-	-
P41145	DB00279	-	-
P41145	DB00274	-	-
P41145	DB00418	-	-
P41145	DB00277	-	-
P41145	DB00271	-	-
P41145	DB00376	-	-
P41145	DB00373	-	-
P41145	DB06800	-	-
P41145	DB00379	-	-
P41145	DB06150	-	-
P41145	DB01171	-	-
P41145	DB01172	-	-
P41145	DB01173	-	-
P41145	DB01174	-	-
P41145	DB01175	-	-
P41145	DB01176	-	-
P41145	DB01177	-	-
P41145	DB01179	-	-
P41145	DB00970	-	-
P41145	DB00977	-	-
P41145	DB00975	-	-
P41145	DB00502	-	-
P41145	DB00503	-	-
P41145	DB00500	-	-
P41145	DB00978	-	-
P41145	DB01581	-	-
P41145	DB01582	-	-
P41145	DB01053	-	-
P41145	DB00698	-	-
P41145	DB01050	-	-
P41145	DB01056	-	-
P41145	DB01055	-	-
P41145	DB01054	-	-
P41145	DB00692	-	-
P41145	DB01351	-	-
P41145	DB01059	-	-
P41145	DB01058	-	-
P41145	DB01426	-	-
P41145	DB01427	-	-
P41145	DB00694	-	-
P41145	DB00695	-	-
P41145	DB00987	-	-
P41145	DB00982	-	-
P41145	DB00981	-	-
P41145	DB00591	-	-
P41145	DB00590	-	-
P41145	DB00593	-	-
P41145	DB00595	-	-
P41145	DB00598	-	-
P41145	DB00778	-	-
P41145	DB00809	-	-
P41145	DB00808	-	-
P41145	DB00807	-	-
P41145	DB00806	-	-
P41145	DB00773	-	-
P41145	DB00804	-	-
P41145	DB00776	-	-
P41145	DB00477	-	-
P41145	DB00472	-	-
P41145	DB00471	-	-
P41145	DB00577	-	-
P41145	DB00576	-	-
P41145	DB00575	-	-
P41145	DB00573	-	-
P41145	DB00572	-	-
P41145	DB00571	-	-
P41145	DB00479	-	-
P41145	DB00186	-	-
P41145	DB00187	-	-
P41145	DB00184	-	-
P41145	DB00180	-	-
P41145	DB00181	-	-
P41145	DB00871	-	-
P41145	DB00877	-	-
P41145	DB00874	-	-
P41145	DB01128	-	-
P41145	DB01121	-	-
P41145	DB01120	-	-
P41145	DB01127	-	-
P41145	DB01125	-	-
P41145	DB00330	-	-
P41145	DB00445	-	-
P41145	DB00238	-	-
P41145	DB00239	-	-
P41145	DB00443	-	-
P41145	DB00145	-	-
P41145	DB00235	-	-
P41145	DB00600	-	-
P41145	DB00602	-	-
P41145	DB00604	-	-
P41145	DB01224	-	-
P41145	DB01221	-	-
P41145	DB01222	-	-
P41145	DB01223	-	-
P41145	DB00898	-	-
P41145	DB00482	-	-
P41145	DB00936	-	-
P41145	DB00956	-	-
P41145	DB01339	-	-
P41145	DB00730	-	-
P41145	DB01148	-	-
P41145	DB01147	-	-
P41145	DB01143	-	-
P41145	DB01142	-	-
P41145	DB01082	-	-
P41145	DB00839	-	-
P41145	DB01086	-	-
P41145	DB01087	-	-
P41145	DB00623	-	-
P41145	DB00620	-	-
P41145	DB00627	-	-
P41145	DB00624	-	-
P41145	DB01242	-	-
P41145	DB01243	-	-
P41145	DB01241	-	-
P41145	DB01248	-	-
P41145	DB01394	-	-
P41145	DB01396	-	-
P41145	DB06148	-	-
P41145	DB00169	-	-
P41145	DB01392	-	-
P41145	DB01393	-	-
P41145	DB06147	-	-
P41145	DB01399	-	-
P41145	DB00818	-	-
P41145	DB00819	-	-
P41145	DB00762	-	-
P41145	DB00763	-	-
P41145	DB00812	-	-
P41145	DB00813	-	-
P41145	DB00814	-	-
P41145	DB00765	-	-
P41145	DB00568	-	-
P41145	DB00401	-	-
P41145	DB00400	-	-
P41145	DB00406	-	-
P41145	DB00404	-	-
P41145	DB00561	-	-
P41145	DB00563	-	-
P41145	DB00564	-	-
P41145	DB04841	-	-
P41145	DB00567	-	-
P41145	DB00759	-	-
P41145	DB00696	-	-
P41145	DB00884	-	-
P41145	DB00968	-	-
P41145	DB00969	-	-
P41145	DB00881	-	-
P41145	DB00967	-	-
P41145	DB00960	-	-
P41145	DB00961	-	-
P41145	DB00889	-	-
P41145	DB00963	-	-
P41145	DB06729	-	-
P41145	DB00249	-	-
P41145	DB00717	-	-
P41145	DB00715	-	-
P41145	DB00242	-	-
P41145	DB00245	-	-
P41145	DB00712	-	-
P41145	DB00247	-	-
P41145	DB00367	-	-
P41145	DB00365	-	-
P41145	DB00363	-	-
P41145	DB00361	-	-
P41145	DB01024	-	-
P41145	DB03166	-	-
P41145	DB00611	-	-
P41145	DB00614	-	-
P41145	DB00615	-	-
P41145	DB01211	-	-
P41145	DB01210	-	-
P41145	DB01213	-	-
P41145	DB00619	-	-
P41145	DB01217	-	-
P41145	DB01216	-	-
P41145	DB06698	-	-
P41145	DB01188	-	-
P41145	DB01627	-	-
P41145	DB01181	-	-
P41145	DB06691	-	-
P41145	DB01183	-	-
P41145	DB01182	-	-
P41145	DB01184	-	-
P41145	DB01186	-	-
P41145	DB00685	-	-
P41145	DB00811	-	-
P41145	DB01029	-	-
P41145	DB00760	-	-
P41145	DB08807	-	-
P41145	DB04838	-	-
P41145	DB01599	-	-
P41145	DB01044	-	-
P41145	DB01045	-	-
P41145	DB01229	-	-
P41145	DB01595	-	-
P41145	DB01041	-	-
P41145	DB01042	-	-
P41145	DB00661	-	-
P41145	DB00669	-	-
P41145	DB00668	-	-
P41145	DB00583	-	-
P41145	DB00586	-	-
P41145	DB00584	-	-
P41145	DB00585	-	-
P41145	DB08797	-	-
P41145	DB00589	-	-
P41145	DB00339	-	-
P41145	DB00724	-	-
P41145	DB00725	-	-
P41145	DB00722	-	-
P41145	DB00721	-	-
P41145	DB00331	-	-
P41145	DB00446	-	-
P41145	DB00333	-	-
P41145	DB00335	-	-
P41145	DB00334	-	-
P41145	DB00441	-	-
P41145	DB01136	-	-
P41145	DB01137	-	-
P41145	DB01132	-	-
P41145	DB01206	-	-
P41145	DB00207	-	-
P41145	DB00206	-	-
P41145	DB00201	-	-
P41145	DB00202	-	-
P41145	DB00208	-	-
P41145	DB06770	-	-
P37231	-	TAXID:65948	Apigenin
P37231	-	TAXID:74900	Kaempferol
P37231	-	TAXID:51240	Palmitoleic Acid
P37231	-	TAXID:4081	Naringenin
P37231	-	TAXID:4222	Acacetin
P37231	-	TAXID:4222	Alpha-Linolenic Acid
P37231	-	TAXID:4577	Chrysoeriol
P37231	-	TAXID:4577	Naringenin
P37231	-	TAXID:4577	Kaempferol
P37231	-	TAXID:36610	Apigenin
P37231	-	TAXID:36610	Kaempferol
P37231	-	TAXID:36610	Chrysoeriol
P37231	-	TAXID:4006	Alpha-Linolenic Acid
P37231	-	TAXID:175228	Syringetin
P37231	-	TAXID:4045	Apigenin
P37231	-	TAXID:4045	Kaempferol
P37231	-	TAXID:4045	Chrysoeriol
P37231	-	TAXID:4679	Kaempferol
P37231	-	TAXID:4047	Kaempferol
P37231	-	TAXID:78168	Apigenin
P37231	-	TAXID:4530	Linoleic
P37231	-	TAXID:4530	Kaempferol
P37231	-	TAXID:4681	Kaempferol
P37231	-	TAXID:48038	Kaempferol
P37231	-	TAXID:89151	Apigenin
P37231	-	TAXID:3760	Hesperetin
P37231	-	TAXID:4146	Apigenin
P37231	-	TAXID:4146	Diosmetin
P37231	-	TAXID:4146	Kaempferol
P37231	-	TAXID:4146	Chrysoeriol
P37231	-	TAXID:3469	Kaempferol
P37231	-	TAXID:29780	Kaempferol
P37231	-	TAXID:3747	Naringenin
P37231	-	TAXID:3747	Kaempferol
P37231	-	TAXID:3708	Naringenin
P37231	-	TAXID:3708	Kaempferol
P37231	-	TAXID:32247	Kaempferol
P37231	-	TAXID:171929	Linoleic
P37231	-	TAXID:49827	Formononetin
P37231	-	TAXID:49827	Naringenin
P37231	-	TAXID:35925	Kaempferol
P37231	-	TAXID:3888	Formononetin
P37231	-	TAXID:3888	Naringenin
P37231	-	TAXID:3888	Pseudobaptigenin
P37231	-	TAXID:3888	Kaempferol
P37231	-	TAXID:3888	Daidzein
P37231	-	TAXID:4565	Formononetin
P37231	-	TAXID:94328	Apigenin
P37231	-	TAXID:4236	Gemfibrozil
P37231	-	TAXID:4236	Alpha-Linolenic Acid
P37231	-	TAXID:151069	Kaempferol
P37231	-	TAXID:3649	Daidzein
P37231	-	TAXID:3712	Kaempferol
P37231	-	TAXID:180772	Kaempferol
P37231	-	TAXID:4072	Apigenin
P37231	-	TAXID:4072	Chrysoeriol
P37231	-	TAXID:4442	Genistein
P37231	-	TAXID:4442	Hesperetin
P37231	-	TAXID:4442	Kaempferol
P37231	-	TAXID:4442	Apigenin
P37231	-	TAXID:4442	Daidzein
P37231	-	TAXID:4442	Naringenin
P37231	-	TAXID:120290	Naringenin
P37231	-	TAXID:120290	Kaempferol
P37231	-	TAXID:74645	Kaempferol
P37231	-	TAXID:3847	Genistein
P37231	-	TAXID:3847	Linoleic
P37231	-	TAXID:3847	Kaempferol
P37231	-	TAXID:3847	Apigenin
P37231	-	TAXID:3847	Daidzein
P37231	-	TAXID:3847	Naringenin
P37231	-	TAXID:3847	74-Dihydroxyflavone
P37231	-	TAXID:3711	Alpha-Linolenic Acid
P37231	-	TAXID:3711	Linoleic
P37231	-	TAXID:3711	Kaempferol
P37231	-	TAXID:3659	Kaempferol
P37231	-	TAXID:50225	Chrysoeriol
P37231	DB00834	-	-
P37231	DB01094	-	-
P37231	DB00784	-	-
P37231	DB01092	-	-
P37231	DB00421	-	-
P37231	DB00390	-	-
P37231	DB00396	-	-
P37231	DB00258	-	-
P37231	DB00783	-	-
P37231	DB00255	-	-
P37231	DB00313	-	-
P37231	DB00091	-	-
P37231	DB00159	-	-
P37231	DB00945	-	-
P37231	DB00384	-	-
P37231	DB00140	-	-
P37231	DB00382	-	-
P37231	DB00925	-	-
P37231	DB00624	-	-
P37231	DB01241	-	-
P37231	DB00307	-	-
P37231	DB00738	-	-
P37231	DB00227	-	-
P37231	DB00220	-	-
P37231	DB01394	-	-
P37231	DB01396	-	-
P37231	DB01393	-	-
P37231	DB06710	-	-
P37231	DB03255	-	-
P37231	DB00970	-	-
P37231	DB00811	-	-
P37231	DB00795	-	-
P37231	DB00400	-	-
P37231	DB00675	-	-
P37231	DB00563	-	-
P37231	DB01229	-	-
P37231	DB00375	-	-
P37231	DB00882	-	-
P37231	DB00966	-	-
P37231	DB00166	-	-
P37231	DB01069	-	-
P37231	DB00648	-	-
P37231	DB00162	-	-
P37231	DB00415	-	-
P37231	DB00168	-	-
P37231	DB00169	-	-
P37231	DB00412	-	-
P37231	DB00554	-	-
P37231	DB00550	-	-
P37231	DB01024	-	-
P37231	DB00482	-	-
P37231	DB00481	-	-
P37231	DB03166	-	-
P37231	DB01100	-	-
P37231	DB00509	-	-
P37231	DB06689	-	-
P37231	DB00615	-	-
P37231	DB00507	-	-
P37231	DB00698	-	-
P37231	DB01050	-	-
P37231	DB01346	-	-
P37231	DB06691	-	-
P37231	DB01420	-	-
P37231	DB00468	-	-
P37231	DB00694	-	-
P37231	DB00682	-	-
P37231	DB00982	-	-
P37231	DB00595	-	-
P37231	DB01115	-	-
P37231	DB01045	-	-
P37231	DB00772	-	-
P37231	DB01042	-	-
P37231	DB00815	-	-
P37231	DB00661	-	-
P37231	DB00571	-	-
P37231	DB00262	-	-
P37231	DB00586	-	-
P37231	DB00406	-	-
P37231	DB00928	-	-
P37231	DB00636	-	-
P37231	DB01127	-	-
P37231	DB00523	-	-
P37231	DB01232	-	-
P37231	DB00132	-	-
P37231	DB00445	-	-
P37231	DB01039	-	-
P37231	DB00238	-	-
P37231	DB00235	-	-
P37231	DB00903	-	-
P37231	DB01132	-	-
P37231	DB00908	-	-
P37231	DB01026	-	-
P37231	DB01438	-	-
P37231	DB00328	-	-
P37231	DB00756	-	-
P37231	DB00755	-	-
P37231	DB00451	-	-
P37231	DB00321	-	-
P37231	DB00205	-	-
P37231	DB00206	-	-
P37231	DB00997	-	-
P36888	-	TAXID:120290	Ellagic Acid
P36888	-	TAXID:32247	Ellagic Acid
P36888	-	TAXID:22663	Ellagic Acid
P36888	-	TAXID:3435	Staurosporine
P36888	-	TAXID:151069	Ellagic Acid
P36888	-	TAXID:29780	Ellagic Acid
P36888	-	TAXID:3747	Ellagic Acid
P36888	DB00398	-	-
P36888	DB00317	-	-
P36888	DB06616	-	-
P36888	DB01254	-	-
P36888	DB00685	-	-
P36888	DB06803	-	-
P36888	DB00619	-	-
P36888	DB04868	-	-
P36888	DB01268	-	-
P36888	DB05294	-	-
P36888	DB00530	-	-
P36888	DB08877	-	-
P36888	DB00877	-	-
P36888	DB01259	-	-
P36888	DB06589	-	-
P36888	DB08901	-	-
P16473	-	TAXID:3755	Mandelonitrile
P16473	-	TAXID:3755	Retinol
P16473	-	TAXID:58860	(+)-Catechin
P16473	-	TAXID:4081	1-Penten-3-One
P16473	-	TAXID:4081	Petunidin
P16473	-	TAXID:4081	Hexanol
P16473	-	TAXID:4081	Phloretin
P16473	-	TAXID:4081	Serotonin
P16473	-	TAXID:4081	Spermidine
P16473	-	TAXID:4081	Chlorogenic Acid
P16473	-	TAXID:4081	Zeatin
P16473	-	TAXID:4081	Piperonyl Butoxide
P16473	-	TAXID:4081	1-Aminocyclopropane-1-Carboxylate
P16473	-	TAXID:4081	Quercetin
P16473	-	TAXID:4442	Luteolin
P16473	-	TAXID:4442	Guaiacol
P16473	-	TAXID:4442	Methyl Salicylate
P16473	-	TAXID:4442	Genistein
P16473	-	TAXID:4442	Apigenin
P16473	-	TAXID:4442	2-Propenal
P16473	-	TAXID:4442	Phloretin
P16473	-	TAXID:4442	Caffeic Acid
P16473	-	TAXID:4442	(+)-Catechin
P16473	-	TAXID:4442	Chlorogenic Acid
P16473	-	TAXID:4442	Hesperetin
P16473	-	TAXID:4442	Quercetin
P16473	-	TAXID:4577	Myrcene
P16473	-	TAXID:4577	Methyl Salicylate
P16473	-	TAXID:4577	Aminoguanidine
P16473	-	TAXID:4577	Carbonyl Cyanide P-Trifluoromethoxyphenylhydrazone
P16473	-	TAXID:4577	5-Fluorouracil
P16473	-	TAXID:4577	Caffeic Acid
P16473	-	TAXID:4577	Chlorogenic Acid
P16473	-	TAXID:4577	Zeatin
P16473	-	TAXID:4577	Beta-Sitosterol
P16473	-	TAXID:4577	Quercetin
P16473	-	TAXID:4577	Tryptophan
P16473	-	TAXID:3494	Bergapten
P16473	-	TAXID:3494	Xanthotoxin
P16473	-	TAXID:29760	(+)-Catechin
P16473	-	TAXID:29760	Quercetin
P16473	-	TAXID:29760	Caffeic Acid
P16473	-	TAXID:29760	Petunidin
P16473	-	TAXID:29760	Beta-Sitosterol
P16473	-	TAXID:114280	Chlorogenic Acid
P16473	-	TAXID:114280	Caffeic Acid
P16473	-	TAXID:114280	Quercetin
P16473	-	TAXID:4045	Luteolin
P16473	-	TAXID:4045	Fumaric
P16473	-	TAXID:4045	Bergapten
P16473	-	TAXID:4045	Estragole
P16473	-	TAXID:4045	Caffeic Acid
P16473	-	TAXID:4045	Apigenin
P16473	-	TAXID:4045	Nicotinic Acid
P16473	-	TAXID:4045	Xanthotoxin
P16473	-	TAXID:4045	Beta-Sitosterol
P16473	-	TAXID:4045	Quercetin
P16473	-	TAXID:4045	Tryptophan
P16473	-	TAXID:4679	4-O-Methyldopamine
P16473	-	TAXID:4679	Fumaric
P16473	-	TAXID:4679	Beta-Mercaptoethylamine
P16473	-	TAXID:4679	Beta-Sitosterol
P16473	-	TAXID:4679	Quercetin
P16473	-	TAXID:4679	Tryptophan
P16473	-	TAXID:4047	Luteolin
P16473	-	TAXID:4047	Xanthotoxin
P16473	-	TAXID:4047	Beta-Sitosterol
P16473	-	TAXID:4047	Quercetin
P16473	-	TAXID:4047	Alpha-Pinene
P16473	-	TAXID:4047	Trans-Anethole
P16473	-	TAXID:4041	Bergapten
P16473	-	TAXID:4041	Xanthotoxin
P16473	-	TAXID:4120	Sporamin
P16473	-	TAXID:4120	Chlorogenic Acid
P16473	-	TAXID:4120	Diamide
P16473	-	TAXID:4120	Fumaric
P16473	-	TAXID:4120	Caffeic Acid
P16473	-	TAXID:4530	Stearic Acid
P16473	-	TAXID:4530	Aspartic Acid
P16473	-	TAXID:4530	Guaiacol
P16473	-	TAXID:4530	Linoleic
P16473	-	TAXID:4530	Acetaldehyde
P16473	-	TAXID:4530	Vinegar
P16473	-	TAXID:4530	Zeatin
P16473	-	TAXID:4530	Beta-Sitosterol
P16473	-	TAXID:4530	Quercetin
P16473	-	TAXID:4530	Beta-Cyclodextrin
P16473	-	TAXID:4530	Betaine Aldehyde
P16473	-	TAXID:32224	(+)-Catechin
P16473	-	TAXID:32224	Chlorogenic Acid
P16473	-	TAXID:32224	Mandelonitrile
P16473	-	TAXID:89151	Apigenin
P16473	-	TAXID:89151	Vinegar
P16473	-	TAXID:89151	Salsolinol
P16473	-	TAXID:89151	Zearalenone
P16473	-	TAXID:40888	Estragole
P16473	-	TAXID:13731	Guaiacol
P16473	-	TAXID:3469	Sanguinarine
P16473	-	TAXID:3469	Aspartic Acid
P16473	-	TAXID:3469	Acetyl Acetate
P16473	-	TAXID:3469	Beta-Sitosterol
P16473	-	TAXID:3469	Quercetin
P16473	-	TAXID:3469	Papaverine
P16473	-	TAXID:3621	Danthron
P16473	-	TAXID:3621	Caffeic Acid
P16473	-	TAXID:3621	Rhein
P16473	-	TAXID:3621	Chrysophanol
P16473	-	TAXID:3621	Cholestatic
P16473	-	TAXID:3621	Beta-Cyclodextrin
P16473	-	TAXID:3621	Sodium Taurocholate
P16473	-	TAXID:4006	Stearic Acid
P16473	-	TAXID:4006	Podophyllotoxin
P16473	-	TAXID:4006	Beta-Sitosterol
P16473	-	TAXID:4006	1-Penten-3-One
P16473	-	TAXID:4006	Pentanal
P16473	-	TAXID:3914	Beta-Cyclodextrin
P16473	-	TAXID:120290	Caffeic Acid
P16473	-	TAXID:120290	(+)-Catechin
P16473	-	TAXID:120290	Chlorogenic Acid
P16473	-	TAXID:120290	Beta-Sitosterol
P16473	-	TAXID:120290	Quercetin
P16473	-	TAXID:120290	Asiatic Acid
P16473	-	TAXID:157791	1-Aminocyclopropane-1-Carboxylate
P16473	-	TAXID:157791	Nicotine
P16473	-	TAXID:157791	Vinegar
P16473	-	TAXID:157791	Tryptophan
P16473	-	TAXID:4681	Quercetin
P16473	-	TAXID:4681	Hexanol
P16473	-	TAXID:4681	Caffeic Acid
P16473	-	TAXID:4681	Ee-24-Decadienal
P16473	-	TAXID:4681	Pentanal
P16473	-	TAXID:49827	Glycyrrhetic Acid
P16473	-	TAXID:49827	Beta-Sitosterol
P16473	-	TAXID:49827	Caffeic Acid
P16473	-	TAXID:3562	2-Propenal
P16473	-	TAXID:3562	Cis-Abscisic Acid
P16473	-	TAXID:3562	Thapsigargin
P16473	-	TAXID:3562	Tryptophan
P16473	-	TAXID:3888	Alpha-Aminoadipic Acid
P16473	-	TAXID:3888	Nicotinic Acid
P16473	-	TAXID:3888	Zeatin
P16473	-	TAXID:3888	1-Aminocyclopropane-1-Carboxylate
P16473	-	TAXID:3888	Quercetin
P16473	-	TAXID:3888	Tryptophan
P16473	-	TAXID:4565	Zearalenone
P16473	-	TAXID:4565	Guaiacol
P16473	-	TAXID:4565	Chlorogenic Acid
P16473	-	TAXID:4565	Zeatin
P16473	-	TAXID:4565	Quercetin
P16473	-	TAXID:4565	Ethyl Alcohol
P16473	-	TAXID:4072	Luteolin
P16473	-	TAXID:4072	Fumaric
P16473	-	TAXID:4072	Dihydrocapsaicin
P16473	-	TAXID:4072	Apigenin
P16473	-	TAXID:4072	Vinegar
P16473	-	TAXID:4072	Piperonyl Butoxide
P16473	-	TAXID:4072	Quercetin
P16473	-	TAXID:4072	Haematoxylin
P16473	-	TAXID:4072	Curcumin
P16473	-	TAXID:151069	(+)-Catechin
P16473	-	TAXID:151069	L-Allylglycine
P16473	-	TAXID:151069	Acetaldehyde
P16473	-	TAXID:151069	Ethyl Alcohol
P16473	-	TAXID:151069	Hexanol
P16473	-	TAXID:41241	(+)-Catechin
P16473	-	TAXID:3885	Quercetin
P16473	-	TAXID:3885	Allantoin
P16473	-	TAXID:3885	Tryptophan
P16473	-	TAXID:3726	Retinol
P16473	-	TAXID:74645	(+)-Catechin
P16473	-	TAXID:74645	Quercetin
P16473	-	TAXID:161934	3-Methoxytyramine
P16473	-	TAXID:161934	Silymarin
P16473	-	TAXID:180772	Quercetin
P16473	-	TAXID:180772	Petunidin
P16473	-	TAXID:4498	Nicotine
P16473	-	TAXID:4498	Caffeic Acid
P16473	-	TAXID:3847	Bisphenol A Bpa
P16473	-	TAXID:3847	Apigenin
P16473	-	TAXID:3847	Linoleic
P16473	-	TAXID:3847	23-Butanedione
P16473	-	TAXID:3847	(+)-Catechin
P16473	-	TAXID:3847	Genistein
P16473	-	TAXID:3847	Nicotinic Acid
P16473	-	TAXID:3847	Allantoin
P16473	-	TAXID:3847	Quercetin
P16473	-	TAXID:3847	Tryptophan
P16473	-	TAXID:33125	Thalidomide
P16473	-	TAXID:33125	Carbamazepine
P16473	-	TAXID:33125	Alpha-Pinene
P16473	-	TAXID:3627	Chlorogenic Acid
P16473	-	TAXID:3627	Acetaldehyde
P16473	-	TAXID:3627	Beta-Sitosterol
P16473	-	TAXID:3627	Asiatic Acid
P16473	-	TAXID:3711	Stearic Acid
P16473	-	TAXID:3711	Linoleic
P16473	-	TAXID:3711	Caffeic Acid
P16473	-	TAXID:3711	Spermidine
P16473	-	TAXID:3711	Beta-Sitosterol
P16473	-	TAXID:3711	Quercetin
P16473	-	TAXID:3711	Tryptophan
P16473	-	TAXID:3659	Quercetin
P16473	-	TAXID:3712	Quercetin
P16473	-	TAXID:3712	Gramine
P16473	-	TAXID:3712	Retinol
P16473	-	TAXID:3712	Caffeic Acid
P16473	-	TAXID:4113	Serotonin
P16473	-	TAXID:4113	Caffeic Acid
P16473	-	TAXID:4113	(+)-Catechin
P16473	-	TAXID:4113	Chlorogenic Acid
P16473	-	TAXID:4113	Vinegar
P16473	-	TAXID:4113	Zeatin
P16473	-	TAXID:4113	1-Aminocyclopropane-1-Carboxylate
P16473	-	TAXID:4113	Tryptophan
P16473	-	TAXID:85571	34-Dimethoxybenzaldehyde
P16473	-	TAXID:85571	Ee-24-Decadienal
P16473	-	TAXID:4111	Chlorogenic Acid
P16473	-	TAXID:4111	Guaiacol
P16473	-	TAXID:4111	Caffeic Acid
P16473	-	TAXID:4111	Ribavirin
P16473	-	TAXID:65948	Luteolin
P16473	-	TAXID:65948	Apigenin
P16473	-	TAXID:65948	Caffeic Acid
P16473	-	TAXID:74900	Quercetin
P16473	-	TAXID:74900	Dimethyl Disulfide
P16473	-	TAXID:74900	Caffeic Acid
P16473	-	TAXID:51240	Stearic Acid
P16473	-	TAXID:51240	Caffeic Acid
P16473	-	TAXID:4222	Luteolin
P16473	-	TAXID:4222	Quercetin
P16473	-	TAXID:4222	Serotonin
P16473	-	TAXID:4222	Beta-Sitosterol
P16473	-	TAXID:4222	Pentanal
P16473	-	TAXID:36610	Luteolin
P16473	-	TAXID:36610	Chlorogenic Acid
P16473	-	TAXID:36610	Apigenin
P16473	-	TAXID:36610	Quercetin
P16473	-	TAXID:4682	Ninhydrin
P16473	-	TAXID:4682	2-Propen-1-Ol
P16473	-	TAXID:4682	Trifluoperazine
P16473	-	TAXID:4682	Beta-Sitosterol
P16473	-	TAXID:4682	Quercetin
P16473	-	TAXID:4682	Dimethyl Disulfide
P16473	-	TAXID:4682	Tryptophan
P16473	-	TAXID:4182	Beta-Sitosterol
P16473	-	TAXID:4513	(+)-Catechin
P16473	-	TAXID:4513	Aspartic Acid
P16473	-	TAXID:4513	Beta-Sitosterol
P16473	-	TAXID:4513	Caffeic Acid
P16473	-	TAXID:13216	Dextromethorphan
P16473	-	TAXID:13216	Vinegar
P16473	-	TAXID:13216	Nonane
P16473	-	TAXID:13216	Alpha-Pinene
P16473	-	TAXID:13216	Curcumin
P16473	-	TAXID:3708	Luteolin
P16473	-	TAXID:3708	Pentanal
P16473	-	TAXID:3708	2-Propenal
P16473	-	TAXID:3708	Cis-Abscisic Acid
P16473	-	TAXID:3708	Acetaldehyde
P16473	-	TAXID:3708	Caffeic Acid
P16473	-	TAXID:3708	Quercetin
P16473	-	TAXID:3708	Tryptophan
P16473	-	TAXID:175228	Quercetin
P16473	-	TAXID:4550	Vinegar
P16473	-	TAXID:4550	Aminooxyacetate
P16473	-	TAXID:4550	Beta-Sitosterol
P16473	-	TAXID:3635	Guaiacol
P16473	-	TAXID:3760	9-Amino-1234-Tetrahydroacridine
P16473	-	TAXID:3760	Hesperetin
P16473	-	TAXID:3879	Alpha-Aminoadipic Acid
P16473	-	TAXID:3641	(+)-Catechin
P16473	-	TAXID:3641	Salsolinol
P16473	-	TAXID:4146	Luteolin
P16473	-	TAXID:4146	Cinchonine
P16473	-	TAXID:4146	Caffeic Acid
P16473	-	TAXID:4146	Apigenin
P16473	-	TAXID:4146	Ee-24-Decadienal
P16473	-	TAXID:4146	Quercetin
P16473	-	TAXID:29780	Cyclohexane
P16473	-	TAXID:29780	Caffeic Acid
P16473	-	TAXID:29780	(+)-Catechin
P16473	-	TAXID:29780	Zeatin
P16473	-	TAXID:29780	Quercetin
P16473	-	TAXID:29780	Isobutyl Alcohol
P16473	-	TAXID:3649	Bergapten
P16473	-	TAXID:3649	Xanthotoxin
P16473	-	TAXID:3617	Zearalenone
P16473	-	TAXID:3617	23-Butanedione
P16473	-	TAXID:3617	(+)-Catechin
P16473	-	TAXID:3617	Quercetin
P16473	-	TAXID:3617	Tryptophan
P16473	-	TAXID:32247	Quercetin
P16473	-	TAXID:32247	Vinegar
P16473	-	TAXID:32247	Cyclohexane
P16473	-	TAXID:32247	23-Butanedione
P16473	-	TAXID:171929	Stearic Acid
P16473	-	TAXID:171929	Guaiacol
P16473	-	TAXID:171929	Methyl Salicylate
P16473	-	TAXID:171929	Linoleic
P16473	-	TAXID:171929	Ouabain
P16473	-	TAXID:171929	Acetaldehyde
P16473	-	TAXID:171929	Ee-24-Decadienal
P16473	-	TAXID:171929	Beta-Cyclodextrin
P16473	-	TAXID:35925	(+)-Catechin
P16473	-	TAXID:35925	Chlorogenic Acid
P16473	-	TAXID:35925	Vinegar
P16473	-	TAXID:35925	Caffeic Acid
P16473	-	TAXID:35925	Quercetin
P16473	-	TAXID:3747	Benzenemethanol
P16473	-	TAXID:3747	Petunidin
P16473	-	TAXID:3747	2-Butoxyethanol
P16473	-	TAXID:3747	Caffeic Acid
P16473	-	TAXID:3747	(+)-Catechin
P16473	-	TAXID:3747	Vinegar
P16473	-	TAXID:3747	Nicotinic Acid
P16473	-	TAXID:3747	Guaiacol
P16473	-	TAXID:3747	Quercetin
P16473	-	TAXID:51089	CHEBI:2904;CHEBI:55352;CHEMLIST:4248898;CID:2249
P16473	-	TAXID:51089	Alpha-Pinene
P16473	-	TAXID:3983	Acrylonitrile
P16473	-	TAXID:3983	2-Methylpropionitrile
P16473	-	TAXID:4236	4-O-Methyldopamine
P16473	-	TAXID:4236	Hexanol
P16473	-	TAXID:4236	Acetaldehyde
P16473	-	TAXID:4236	Gemfibrozil
P16473	-	TAXID:4236	Vinegar
P16473	-	TAXID:4236	Quercetin
P16473	-	TAXID:3346	Alpha-Pinene
P16473	-	TAXID:55513	Alpha-Pinene
P16473	-	TAXID:128608	Caffeic Acid
P16473	-	TAXID:4233	5-Hydroxymethylfurfural
P16473	-	TAXID:4073	Dihydrocapsaicin
P16473	-	TAXID:50225	Luteolin
P16473	-	TAXID:50225	Chlorogenic Acid
P16473	-	TAXID:50225	Quercetin
P16473	-	TAXID:13427	Chlorogenic Acid
P16473	-	TAXID:13427	Beta-Sitosterol
P16473	-	TAXID:13427	Caffeic Acid
P16473	-	TAXID:13427	Quercetin
P16473	-	TAXID:78168	Luteolin
P16473	-	TAXID:78168	Apigenin
P16473	-	TAXID:78168	Octanoate
P16473	-	TAXID:4202	Amantadine
P16473	-	TAXID:48038	Luteolin
P16473	-	TAXID:48038	Myrcene
P16473	-	TAXID:48038	Trans-Anethole
P16473	-	TAXID:48038	Bergapten
P16473	-	TAXID:48038	Estragole
P16473	-	TAXID:48038	Chlorogenic Acid
P16473	-	TAXID:48038	18-Cineole
P16473	-	TAXID:48038	Xanthotoxin
P16473	-	TAXID:48038	Beta-Sitosterol
P16473	-	TAXID:48038	Quercetin
P16473	-	TAXID:48038	Thujone
P16473	-	TAXID:48038	Retinol
P16473	-	TAXID:48038	Alpha-Pinene
P16473	-	TAXID:94328	5-Hydroxy-7-Methoxyflavone
P16473	-	TAXID:94328	Chlorogenic Acid
P16473	-	TAXID:94328	Carbachol
P16473	-	TAXID:94328	Serotonin
P16473	-	TAXID:94328	Acetaldehyde
P16473	-	TAXID:94328	Estragole
P16473	-	TAXID:94328	Apigenin
P16473	-	TAXID:94328	18-Cineole
P16473	-	TAXID:94328	Xanthotoxin
P16473	-	TAXID:94328	Beta-Sitosterol
P16473	-	TAXID:94328	Curcumin
P16473	-	TAXID:94328	Beta-Cyclodextrin
P16473	-	TAXID:22663	Pyridinium
P16473	-	TAXID:22663	Quercetin
P16473	-	TAXID:22663	Alpha-Pinene
P16473	-	TAXID:22663	Beta-Sitosterol
P16473	-	TAXID:22663	Hexanol
P16473	-	TAXID:3435	(+)-Catechin
P16473	-	TAXID:2711	Alpha-Pinene
P16473	-	TAXID:4039	2,4,5-Tri-Me Ether-2,4,5-Trihydroxybenzaldehyde
P16473	-	TAXID:3864	(+)-Catechin
P16473	-	TAXID:3864	Luteolin
P16473	-	TAXID:3864	Alpha-Aminoadipic Acid
P16473	-	TAXID:3864	Cortisone
P16473	-	TAXID:3864	Caffeic Acid
P16473	DB00780	-	-
P16473	DB00150	-	-
P16473	DB00153	-	-
P16473	DB00783	-	-
P16473	DB00832	-	-
P16473	DB01092	-	-
P16473	DB00938	-	-
P16473	DB00788	-	-
P16473	DB00420	-	-
P16473	DB00935	-	-
P16473	DB00422	-	-
P16473	DB00396	-	-
P16473	DB00427	-	-
P16473	DB01142	-	-
P16473	DB00914	-	-
P16473	DB00258	-	-
P16473	DB01094	-	-
P16473	DB00543	-	-
P16473	DB01019	-	-
P16473	DB01016	-	-
P16473	DB00250	-	-
P16473	DB00251	-	-
P16473	DB00604	-	-
P16473	DB00254	-	-
P16473	DB00255	-	-
P16473	DB00390	-	-
P16473	DB00211	-	-
P16473	DB00316	-	-
P16473	DB00934	-	-
P16473	DB01058	-	-
P16473	DB00831	-	-
P16473	DB01005	-	-
P16473	DB00393	-	-
P16473	DB00694	-	-
P16473	DB01210	-	-
P16473	DB00943	-	-
P16473	DB01380	-	-
P16473	DB00391	-	-
P16473	DB00945	-	-
P16473	DB01080	-	-
P16473	DB00841	-	-
P16473	DB00116	-	-
P16473	DB00847	-	-
P16473	DB00382	-	-
P16473	DB00262	-	-
P16473	DB01156	-	-
P16473	DB00622	-	-
P16473	DB00848	-	-
P16473	DB00388	-	-
P16473	DB00925	-	-
P16473	DB00434	-	-
P16473	DB00507	-	-
P16473	DB01074	-	-
P16473	DB00532	-	-
P16473	DB01244	-	-
P16473	DB01242	-	-
P16473	DB00730	-	-
P16473	DB00733	-	-
P16473	DB01241	-	-
P16473	DB01222	-	-
P16473	DB01001	-	-
P16473	DB01002	-	-
P16473	DB00668	-	-
P16473	DB01203	-	-
P16473	DB01006	-	-
P16473	DB00563	-	-
P16473	DB00227	-	-
P16473	DB00257	-	-
P16473	DB00544	-	-
P16473	DB00221	-	-
P16473	DB01394	-	-
P16473	DB01195	-	-
P16473	DB00259	-	-
P16473	DB00158	-	-
P16473	DB01392	-	-
P16473	DB00915	-	-
P16473	DB00395	-	-
P16473	DB01297	-	-
P16473	DB00818	-	-
P16473	DB00455	-	-
P16473	DB01045	-	-
P16473	DB00540	-	-
P16473	DB00811	-	-
P16473	DB00462	-	-
P16473	DB01075	-	-
P16473	DB00827	-	-
P16473	DB00816	-	-
P16473	DB00545	-	-
P16473	DB01166	-	-
P16473	DB00672	-	-
P16473	DB00400	-	-
P16473	DB01162	-	-
P16473	DB01160	-	-
P16473	DB00679	-	-
P16473	DB00276	-	-
P16473	DB04844	-	-
P16473	DB00564	-	-
P16473	DB01420	-	-
P16473	DB04840	-	-
P16473	DB01182	-	-
P16473	DB00376	-	-
P16473	DB00370	-	-
P16473	DB00433	-	-
P16473	DB01426	-	-
P16473	DB06803	-	-
P16473	DB00379	-	-
P16473	DB00468	-	-
P16473	DB00887	-	-
P16473	DB00800	-	-
P16473	DB00548	-	-
P16473	DB06729	-	-
P16473	DB01090	-	-
P16473	DB06148	-	-
P16473	DB01288	-	-
P16473	DB01186	-	-
P16473	DB00960	-	-
P16473	DB00181	-	-
P16473	DB00888	-	-
P16473	DB00797	-	-
P16473	DB00166	-	-
P16473	DB00794	-	-
P16473	DB00130	-	-
P16473	DB00648	-	-
P16473	DB00162	-	-
P16473	DB00822	-	-
P16473	DB00414	-	-
P16473	DB00641	-	-
P16473	DB00168	-	-
P16473	DB01067	-	-
P16473	DB01064	-	-
P16473	DB00640	-	-
P16473	DB01172	-	-
P16473	DB00550	-	-
P16473	DB00553	-	-
P16473	DB01177	-	-
P16473	DB01178	-	-
P16473	DB01179	-	-
P16473	DB00243	-	-
P16473	DB00245	-	-
P16473	DB00712	-	-
P16473	DB00711	-	-
P16473	DB00726	-	-
P16473	DB00589	-	-
P16473	DB00415	-	-
P16473	DB06288	-	-
P16473	DB06709	-	-
P16473	DB01198	-	-
P16473	DB00368	-	-
P16473	DB00892	-	-
P16473	DB00483	-	-
P16473	DB00482	-	-
P16473	DB00481	-	-
P16473	DB03166	-	-
P16473	DB01100	-	-
P16473	DB01103	-	-
P16473	DB00795	-	-
P16473	DB01105	-	-
P16473	DB00749	-	-
P16473	DB00975	-	-
P16473	DB00615	-	-
P16473	DB00502	-	-
P16473	DB00297	-	-
P16473	DB00747	-	-
P16473	DB00636	-	-
P16473	DB00602	-	-
P16473	DB00291	-	-
P16473	DB01620	-	-
P16473	DB00717	-	-
P16473	DB00698	-	-
P16473	DB01050	-	-
P16473	DB01626	-	-
P16473	DB01054	-	-
P16473	DB00692	-	-
P16473	DB06691	-	-
P16473	DB01059	-	-
P16473	DB01421	-	-
P16473	DB06694	-	-
P16473	DB01184	-	-
P16473	DB01424	-	-
P16473	DB00206	-	-
P16473	DB00279	-	-
P16473	DB00194	-	-
P16473	DB00359	-	-
P16473	DB00358	-	-
P16473	DB00356	-	-
P16473	DB00353	-	-
P16473	DB00983	-	-
P16473	DB00996	-	-
P16473	DB00869	-	-
P16473	DB00593	-	-
P16473	DB00283	-	-
P16473	DB04711	-	-
P16473	DB08905	-	-
[truncated: 114 more rows]

## Sheet: Infectious
Protein	Drug name	Plant source	Plant compound
P00918	-	TAXID:65948	Caffeic Acid
P00918	-	TAXID:29760	(+)-Catechin
P00918	-	TAXID:29760	Quercetin
P00918	-	TAXID:29760	Resveratrol
P00918	-	TAXID:29760	Caffeic Acid
P00918	-	TAXID:74900	P-Coumaric Acid
P00918	-	TAXID:74900	Quercetin
P00918	-	TAXID:74900	Protocatechuic Acid
P00918	-	TAXID:74900	Caffeic Acid
P00918	-	TAXID:74900	P-Hydroxybenzoic Acid
P00918	-	TAXID:51240	Protocatechuic Acid
P00918	-	TAXID:51240	Caffeic Acid
P00918	-	TAXID:51240	P-Hydroxybenzoic Acid
P00918	-	TAXID:58860	(+)-Catechin
P00918	-	TAXID:4081	Resveratrol
P00918	-	TAXID:4081	Serotonin
P00918	-	TAXID:4081	Spermine
P00918	-	TAXID:4081	Spermidine
P00918	-	TAXID:4081	P-Hydroxybenzoic Acid
P00918	-	TAXID:4081	Quercetin
P00918	-	TAXID:4222	Serotonin
P00918	-	TAXID:4222	Ferric Thiocyanate
P00918	-	TAXID:4222	Quercetin
P00918	-	TAXID:4577	P-Coumaric Acid
P00918	-	TAXID:4577	Spermine
P00918	-	TAXID:4577	Caffeic Acid
P00918	-	TAXID:4577	Phosphoserine
P00918	-	TAXID:4577	Quercetin
P00918	-	TAXID:4577	Tyrosine
P00918	-	TAXID:4577	Tryptophan
P00918	-	TAXID:13894	P-Hydroxybenzoic Acid
P00918	-	TAXID:3983	P-Coumaric Acid
P00918	-	TAXID:3983	Protocatechuic Acid
P00918	-	TAXID:36610	Quercetin
P00918	-	TAXID:4682	P-Coumaric Acid
P00918	-	TAXID:4682	Quercetin
P00918	-	TAXID:4682	Tryptophan
P00918	-	TAXID:4182	Butylated Hydroxytoluene
P00918	-	TAXID:3712	P-Coumaric Acid
P00918	-	TAXID:3712	Quercetin
P00918	-	TAXID:3712	Tannic Acid
P00918	-	TAXID:3712	Caffeic Acid
P00918	-	TAXID:114280	P-Coumaric Acid
P00918	-	TAXID:114280	Quercetin
P00918	-	TAXID:114280	Protocatechuic Acid
P00918	-	TAXID:114280	Caffeic Acid
P00918	-	TAXID:114280	P-Hydroxybenzoic Acid
P00918	-	TAXID:4045	Tyrosol
P00918	-	TAXID:4045	Calcium Propionate
P00918	-	TAXID:4045	Ferulate
P00918	-	TAXID:4045	P-Coumaric Acid
P00918	-	TAXID:4045	Caffeic Acid
P00918	-	TAXID:4045	Quercetin
P00918	-	TAXID:4045	Tryptophan
P00918	-	TAXID:4679	Quercetin
P00918	-	TAXID:4679	Tyrosine
P00918	-	TAXID:4679	Protocatechuic Acid
P00918	-	TAXID:4679	Tryptophan
P00918	-	TAXID:4047	Quercetin
P00918	-	TAXID:4120	Caffeic Acid
P00918	-	TAXID:4530	Guaiacol
P00918	-	TAXID:4530	Ferulate
P00918	-	TAXID:4530	Vinegar
P00918	-	TAXID:4530	P-Hydroxybenzoic Acid
P00918	-	TAXID:4530	Quercetin
P00918	-	TAXID:4530	Histidine
P00918	-	TAXID:4530	Tyrosine
P00918	-	TAXID:41241	(+)-Catechin
P00918	-	TAXID:171929	Tea Polyphenol
P00918	-	TAXID:171929	Guaiacol
P00918	-	TAXID:171929	Isovaleric Acid
P00918	-	TAXID:171929	Tannic Acid
P00918	-	TAXID:3641	(+)-Catechin
P00918	-	TAXID:175228	P-Coumaric Acid
P00918	-	TAXID:175228	Resveratrol
P00918	-	TAXID:175228	Protocatechuic Acid
P00918	-	TAXID:175228	Flavon-3-Ol
P00918	-	TAXID:175228	P-Hydroxybenzoic Acid
P00918	-	TAXID:175228	Quercetin
P00918	-	TAXID:4550	P-Coumaric Acid
P00918	-	TAXID:4550	Vinegar
P00918	-	TAXID:89151	Vinegar
P00918	-	TAXID:89151	Tannic Acid
P00918	-	TAXID:32224	P-Coumaric Acid
P00918	-	TAXID:32224	Tea Polyphenol
P00918	-	TAXID:32224	Protocatechuic Acid
P00918	-	TAXID:32224	O-Coumaric Acid
P00918	-	TAXID:32224	(+)-Catechin
P00918	-	TAXID:4146	P-Coumaric Acid
P00918	-	TAXID:4146	Quercetin
P00918	-	TAXID:4146	Tyrosol
P00918	-	TAXID:4146	Caffeic Acid
P00918	-	TAXID:13731	Guaiacol
P00918	-	TAXID:3469	Quercetin
P00918	-	TAXID:3469	Tyrosine
P00918	-	TAXID:3864	(+)-Catechin
P00918	-	TAXID:3864	Caffeic Acid
P00918	-	TAXID:3864	P-Hydroxybenzoic Acid
P00918	-	TAXID:3621	P-Coumaric Acid
P00918	-	TAXID:3621	Resveratrol
P00918	-	TAXID:3621	Protocatechuic Acid
P00918	-	TAXID:3621	Caffeic Acid
P00918	-	TAXID:3621	P-Hydroxybenzoic Acid
P00918	-	TAXID:29780	Protocatechuic Acid
P00918	-	TAXID:29780	Caffeic Acid
P00918	-	TAXID:29780	(+)-Catechin
P00918	-	TAXID:29780	Ellagic Acid
P00918	-	TAXID:29780	Quercetin
P00918	-	TAXID:29780	Tannic Acid
P00918	-	TAXID:3708	4-Hydroxybenzoate
P00918	-	TAXID:3708	Ferulate
P00918	-	TAXID:3708	Caffeic Acid
P00918	-	TAXID:3708	P-Hydroxybenzoic Acid
P00918	-	TAXID:3708	Quercetin
P00918	-	TAXID:3708	Tryptophan
P00918	-	TAXID:3435	(+)-Catechin
P00918	-	TAXID:3435	Spermine
P00918	-	TAXID:120290	Caffeic Acid
P00918	-	TAXID:120290	(+)-Catechin
P00918	-	TAXID:120290	Ellagic Acid
P00918	-	TAXID:120290	Quercetin
P00918	-	TAXID:120290	Isovaleric Acid
P00918	-	TAXID:120290	Foscarnet
P00918	-	TAXID:48038	Quercetin
P00918	-	TAXID:32247	Ellagic Acid
P00918	-	TAXID:32247	Quercetin
P00918	-	TAXID:32247	Vinegar
P00918	-	TAXID:157791	Vinegar
P00918	-	TAXID:157791	Tryptophan
P00918	-	TAXID:157791	Tannic Acid
P00918	-	TAXID:3818	3,5-Dihydroxybenzoic Acid
P00918	-	TAXID:3818	Resveratrol
P00918	-	TAXID:49827	Caffeic Acid
P00918	-	TAXID:4681	P-Coumaric Acid
P00918	-	TAXID:4681	Protocatechuic Acid
P00918	-	TAXID:4681	Caffeic Acid
P00918	-	TAXID:4681	P-Hydroxybenzoic Acid
P00918	-	TAXID:4681	Quercetin
P00918	-	TAXID:4681	Malonic Acid
P00918	-	TAXID:4513	(+)-Catechin
P00918	-	TAXID:4513	Syringic Acid
P00918	-	TAXID:4513	Caffeic Acid
P00918	-	TAXID:35925	(+)-Catechin
P00918	-	TAXID:35925	Quercetin
P00918	-	TAXID:35925	Vinegar
P00918	-	TAXID:35925	Caffeic Acid
P00918	-	TAXID:3747	Guaiacol
P00918	-	TAXID:3747	P-Coumaric Acid
P00918	-	TAXID:3747	Resveratrol
P00918	-	TAXID:3747	Protocatechuic Acid
P00918	-	TAXID:3747	Caffeic Acid
P00918	-	TAXID:3747	(+)-Catechin
P00918	-	TAXID:3747	Vinegar
P00918	-	TAXID:3747	P-Hydroxybenzoic Acid
P00918	-	TAXID:3747	Ellagic Acid
P00918	-	TAXID:3747	Quercetin
P00918	-	TAXID:3747	Tyrosine
P00918	-	TAXID:3562	Histidine
P00918	-	TAXID:3562	Tryptophan
P00918	-	TAXID:3562	Phosphoserine
P00918	-	TAXID:3888	Carbamoyl Phosphate
P00918	-	TAXID:3888	Histidine
P00918	-	TAXID:3888	Quercetin
P00918	-	TAXID:3888	Tyrosine
P00918	-	TAXID:3888	Pyruvic Acid
P00918	-	TAXID:3888	Tryptophan
P00918	-	TAXID:4565	Quercetin
P00918	-	TAXID:4565	Resveratrol
P00918	-	TAXID:4565	Guaiacol
P00918	-	TAXID:4565	Sodium Diethyldithiocarbamate
P00918	-	TAXID:94328	Serotonin
P00918	-	TAXID:94328	Ferric Thiocyanate
P00918	-	TAXID:4236	Pyrocatechol
P00918	-	TAXID:4236	Vinegar
P00918	-	TAXID:4236	P-Hydroxybenzoic Acid
P00918	-	TAXID:4236	Quercetin
P00918	-	TAXID:151069	Ellagic Acid
P00918	-	TAXID:151069	(+)-Catechin
P00918	-	TAXID:151069	Protocatechuic Acid
P00918	-	TAXID:50225	Quercetin
P00918	-	TAXID:3885	Quercetin
P00918	-	TAXID:3885	Tryptophan
P00918	-	TAXID:128608	Caffeic Acid
P00918	-	TAXID:74645	(+)-Catechin
P00918	-	TAXID:74645	Quercetin
P00918	-	TAXID:51089	Meso-Dihydroguaiaretic Acid
P00918	-	TAXID:51089	Tyrosine
P00918	-	TAXID:4072	Quercetin
P00918	-	TAXID:4072	Vinegar
P00918	-	TAXID:161934	Silymarin
P00918	-	TAXID:180772	P-Coumaric Acid
P00918	-	TAXID:180772	Quercetin
P00918	-	TAXID:180772	Resveratrol
P00918	-	TAXID:13427	Quercetin
P00918	-	TAXID:13427	4-Hydroxyphenylacetic Acid
P00918	-	TAXID:13427	Syringic Acid
P00918	-	TAXID:13427	Caffeic Acid
P00918	-	TAXID:4442	Tea Polyphenol
P00918	-	TAXID:4442	Guaiacol
P00918	-	TAXID:4442	Resveratrol
P00918	-	TAXID:4442	Caffeic Acid
P00918	-	TAXID:4442	(+)-Catechin
P00918	-	TAXID:4442	Quercetin
P00918	-	TAXID:4498	P-Coumaric Acid
P00918	-	TAXID:4498	Caffeic Acid
P00918	-	TAXID:4498	P-Hydroxybenzoic Acid
P00918	-	TAXID:13216	Pyrocatechol
P00918	-	TAXID:13216	Vinegar
P00918	-	TAXID:13216	Butylated Hydroxytoluene
P00918	-	TAXID:13216	Tannic Acid
P00918	-	TAXID:3847	Cadaverine
P00918	-	TAXID:3847	Tryptophan
P00918	-	TAXID:3847	(+)-Catechin
P00918	-	TAXID:3847	P-Nitrophenylphosphate
P00918	-	TAXID:3847	Quercetin
P00918	-	TAXID:3847	Isovaleric Acid
P00918	-	TAXID:3635	Guaiacol
P00918	-	TAXID:22663	Ellagic Acid
P00918	-	TAXID:22663	Quercetin
P00918	-	TAXID:4006	Syringic Acid
P00918	-	TAXID:3711	Spermidine
P00918	-	TAXID:3711	Quercetin
P00918	-	TAXID:3711	Resveratrol
P00918	-	TAXID:3711	Tryptophan
P00918	-	TAXID:3711	Caffeic Acid
P00918	-	TAXID:3659	Quercetin
P00918	-	TAXID:3617	(+)-Catechin
P00918	-	TAXID:3617	Quercetin
P00918	-	TAXID:3617	Tryptophan
P00918	-	TAXID:3617	Tannic Acid
P00918	-	TAXID:4113	P-Coumaric Acid
P00918	-	TAXID:4113	Protocatechuic Acid
P00918	-	TAXID:4113	Serotonin
P00918	-	TAXID:4113	Caffeic Acid
P00918	-	TAXID:4113	Tannic Acid
P00918	-	TAXID:4113	(+)-Catechin
P00918	-	TAXID:4113	Vinegar
P00918	-	TAXID:4113	P-Hydroxybenzoic Acid
P00918	-	TAXID:4113	Tyrosine
P00918	-	TAXID:4113	Tryptophan
P00918	-	TAXID:4111	P-Coumaric Acid
P00918	-	TAXID:4111	Guaiacol
P00918	-	TAXID:4111	Caffeic Acid
P00918	DB01064	-	-
P00918	DB01097	-	-
P00918	DB00153	-	-
P00918	DB00709	-	-
P00918	DB00258	-	-
P00918	DB00259	-	-
P00918	DB00252	-	-
P00918	DB00701	-	-
P00918	DB00703	-	-
P00918	DB00704	-	-
P00918	DB00257	-	-
P00918	DB00254	-	-
P00918	DB00255	-	-
P00918	DB00313	-	-
P00918	DB00311	-	-
P00918	DB00310	-	-
P00918	DB00316	-	-
P00918	DB00091	-	-
P00918	DB00319	-	-
P00918	DB00478	-	-
P00918	DB00570	-	-
P00918	DB00882	-	-
P00918	DB01156	-	-
P00918	DB00184	-	-
P00918	DB01151	-	-
P00918	DB00650	-	-
P00918	DB00227	-	-
P00918	DB00224	-	-
P00918	DB00222	-	-
P00918	DB00220	-	-
P00918	DB00962	-	-
P00918	DB06715	-	-
P00918	DB06710	-	-
P00918	DB03255	-	-
P00918	DB00178	-	-
P00918	DB01075	-	-
P00918	DB01074	-	-
P00918	DB00175	-	-
P00918	DB01076	-	-
P00918	DB00672	-	-
P00918	DB00674	-	-
P00918	DB00675	-	-
P00918	DB00679	-	-
P00918	DB01275	-	-
P00918	DB00251	-	-
P00918	DB00795	-	-
P00918	DB00794	-	-
P00918	DB00793	-	-
P00918	DB00823	-	-
P00918	DB00822	-	-
P00918	DB00415	-	-
P00918	DB00829	-	-
P00918	DB00411	-	-
P00918	DB00412	-	-
P00918	DB00798	-	-
P00918	DB00555	-	-
P00918	DB00554	-	-
P00918	DB00551	-	-
P00918	DB00550	-	-
P00918	DB00553	-	-
P00918	DB00959	-	-
P00918	DB00489	-	-
P00918	DB00488	-	-
P00918	DB00483	-	-
P00918	DB00482	-	-
P00918	DB00481	-	-
P00918	DB00487	-	-
P00918	DB00484	-	-
P00918	DB01103	-	-
P00918	DB01105	-	-
P00918	DB01104	-	-
P00918	DB00214	-	-
P00918	DB00215	-	-
P00918	DB00359	-	-
P00918	DB00357	-	-
P00918	DB00356	-	-
P00918	DB00353	-	-
P00918	DB00350	-	-
P00918	DB06768	-	-
P00918	DB01208	-	-
P00918	DB01203	-	-
P00918	DB01200	-	-
P00918	DB01201	-	-
P00918	DB01611	-	-
P00918	DB01204	-	-
P00918	DB01205	-	-
P00918	DB01199	-	-
P00918	DB01193	-	-
P00918	DB01190	-	-
P00918	DB01191	-	-
P00918	DB01197	-	-
P00918	DB01194	-	-
P00918	DB01037	-	-
P00918	DB01299	-	-
P00918	DB00915	-	-
P00918	DB00384	-	-
P00918	DB00916	-	-
P00918	DB00911	-	-
P00918	DB00529	-	-
P00918	DB00524	-	-
P00918	DB00525	-	-
P00918	DB00919	-	-
P00918	DB00523	-	-
P00918	DB01035	-	-
P00918	DB00135	-	-
P00918	DB01408	-	-
P00918	DB01030	-	-
P00918	DB01032	-	-
P00918	DB01406	-	-
P00918	DB01407	-	-
P00918	DB01400	-	-
P00918	DB00846	-	-
P00918	DB01039	-	-
P00918	DB00951	-	-
P00918	DB00421	-	-
P00918	DB00285	-	-
P00918	DB00284	-	-
P00918	DB00281	-	-
P00918	DB00283	-	-
P00918	DB00437	-	-
P00918	DB00328	-	-
P00918	DB00750	-	-
P00918	DB00756	-	-
P00918	DB00755	-	-
P00918	DB00322	-	-
P00918	DB00320	-	-
P00918	DB00758	-	-
P00918	DB00455	-	-
P00918	DB00324	-	-
P00918	DB00457	-	-
P00918	DB04571	-	-
P00918	DB00420	-	-
P00918	DB00859	-	-
P00918	DB00857	-	-
P00918	DB00850	-	-
P00918	DB00851	-	-
P00918	DB00780	-	-
P00918	DB00428	-	-
P00918	DB00834	-	-
P00918	DB00783	-	-
P00918	DB00784	-	-
P00918	DB00939	-	-
P00918	DB00831	-	-
P00918	DB00393	-	-
P00918	DB00936	-	-
P00918	DB00391	-	-
P00918	DB00390	-	-
P00918	DB00424	-	-
P00918	DB00394	-	-
P00918	DB00547	-	-
P00918	DB00544	-	-
P00918	DB00542	-	-
P00918	DB00543	-	-
P00918	DB00540	-	-
P00918	DB01018	-	-
P00918	DB01016	-	-
P00918	DB01015	-	-
P00918	DB01014	-	-
P00918	DB04868	-	-
P00918	DB01011	-	-
P00918	DB00549	-	-
P00918	DB00233	-	-
P00918	DB00495	-	-
P00918	DB00490	-	-
P00918	DB00493	-	-
P00918	DB08826	-	-
P00918	DB00498	-	-
P00918	DB00499	-	-
P00918	DB00321	-	-
P00918	DB00945	-	-
P00918	DB00734	-	-
P00918	DB00731	-	-
P00918	DB00309	-	-
P00918	DB00733	-	-
P00918	DB00305	-	-
P00918	DB00738	-	-
P00918	DB00302	-	-
P00918	DB01606	-	-
P00918	DB01167	-	-
P00918	DB01166	-	-
P00918	DB01165	-	-
P00918	DB01162	-	-
P00918	DB00426	-	-
P00918	DB01229	-	-
P00918	DB01287	-	-
P00918	DB01186	-	-
P00918	DB01068	-	-
P00918	DB01069	-	-
P00918	DB00160	-	-
P00918	DB00648	-	-
P00918	DB00163	-	-
P00918	DB01062	-	-
P00918	DB01060	-	-
P00918	DB01061	-	-
P00918	DB00641	-	-
P00918	DB01067	-	-
P00918	DB00643	-	-
P00918	DB01065	-	-
P00918	DB01357	-	-
P00918	DB00749	-	-
P00918	DB00298	-	-
P00918	DB00744	-	-
P00918	DB00297	-	-
P00918	DB00740	-	-
P00918	DB00741	-	-
P00918	DB00742	-	-
P00918	DB00291	-	-
P00918	DB00465	-	-
P00918	DB00450	-	-
P00918	DB00467	-	-
P00918	DB00461	-	-
P00918	DB00462	-	-
P00918	DB00469	-	-
P00918	DB00452	-	-
P00918	DB00196	-	-
P00918	DB00190	-	-
P00918	DB00193	-	-
P00918	DB00199	-	-
P00918	DB00869	-	-
P00918	DB00861	-	-
P00918	DB00860	-	-
P00918	DB00863	-	-
P00918	DB00325	-	-
P00918	DB00864	-	-
P00918	DB01113	-	-
P00918	DB01110	-	-
P00918	DB01114	-	-
P00918	DB01115	-	-
P00918	DB00177	-	-
P00918	DB01118	-	-
P00918	DB01119	-	-
P00918	DB01077	-	-
P00918	DB00263	-	-
P00918	DB00262	-	-
P00918	DB00266	-	-
P00918	DB00265	-	-
P00918	DB00264	-	-
P00918	DB00342	-	-
P00918	DB00343	-	-
P00918	DB00347	-	-
P00918	DB00423	-	-
P00918	DB00635	-	-
P00918	DB00636	-	-
P00918	DB00637	-	-
P00918	DB00630	-	-
P00918	DB01233	-	-
P00918	DB01232	-	-
P00918	DB01231	-	-
P00918	DB01235	-	-
P00918	DB01234	-	-
P00918	DB00518	-	-
P00918	DB00904	-	-
P00918	DB01595	-	-
P00918	DB00903	-	-
P00918	DB00513	-	-
P00918	DB00512	-	-
P00918	DB00515	-	-
P00918	DB00514	-	-
P00918	DB00909	-	-
P00918	DB00120	-	-
P00918	DB00688	-	-
P00918	DB00122	-	-
P00918	DB00649	-	-
P00918	DB01023	-	-
P00918	DB00126	-	-
P00918	DB00127	-	-
P00918	DB00681	-	-
P00918	DB00682	-	-
P00918	DB01435	-	-
P00918	DB00684	-	-
P00918	DB01436	-	-
P00918	DB00999	-	-
P00918	DB00995	-	-
P00918	DB00994	-	-
P00918	DB00997	-	-
P00918	DB00996	-	-
P00918	DB00991	-	-
P00918	DB04552	-	-
P00918	DB04573	-	-
P00918	DB00150	-	-
P00918	DB01095	-	-
P00918	DB01092	-	-
P00918	DB01091	-	-
P00918	DB00656	-	-
P00918	DB00655	-	-
P00918	DB00653	-	-
P00918	DB01099	-	-
P00918	DB00651	-	-
P00918	DB01253	-	-
P00918	DB00166	-	-
P00918	DB00788	-	-
P00918	DB00789	-	-
P00918	DB01380	-	-
P00918	DB00935	-	-
P00918	DB00928	-	-
P00918	DB00841	-	-
P00918	DB00934	-	-
P00918	DB00381	-	-
P00918	DB00382	-	-
P00918	DB00844	-	-
P00918	DB00920	-	-
P00918	DB00433	-	-
P00918	DB00848	-	-
P00918	DB00389	-	-
P00918	DB00434	-	-
P00918	DB00396	-	-
P00918	DB01008	-	-
P00918	DB01009	-	-
P00918	DB00531	-	-
P00918	DB00537	-	-
P00918	DB01001	-	-
P00918	DB01002	-	-
P00918	DB01003	-	-
P00918	DB01005	-	-
P00918	DB01006	-	-
P00918	DB00128	-	-
P00918	DB00541	-	-
P00918	DB00279	-	-
P00918	DB00274	-	-
P00918	DB00418	-	-
P00918	DB00277	-	-
P00918	DB00271	-	-
P00918	DB00273	-	-
P00918	DB00376	-	-
P00918	DB00373	-	-
P00918	DB00379	-	-
P00918	DB06150	-	-
P00918	DB01171	-	-
P00918	DB01172	-	-
P00918	DB01173	-	-
P00918	DB01174	-	-
P00918	DB01175	-	-
P00918	DB01176	-	-
P00918	DB01177	-	-
P00918	DB01179	-	-
P00918	DB00970	-	-
P00918	DB00977	-	-
P00918	DB00975	-	-
P00918	DB00502	-	-
P00918	DB00503	-	-
P00918	DB00500	-	-
P00918	DB00978	-	-
P00918	DB01581	-	-
P00918	DB01582	-	-
P00918	DB01053	-	-
P00918	DB00698	-	-
P00918	DB01050	-	-
P00918	DB01056	-	-
P00918	DB01055	-	-
P00918	DB01054	-	-
P00918	DB00692	-	-
P00918	DB01351	-	-
P00918	DB01059	-	-
P00918	DB01058	-	-
P00918	DB00696	-	-
P00918	DB01427	-	-
P00918	DB00694	-	-
P00918	DB00695	-	-
P00918	DB00988	-	-
P00918	DB00987	-	-
P00918	DB00982	-	-
P00918	DB00981	-	-
P00918	DB00591	-	-
P00918	DB00590	-	-
P00918	DB00593	-	-
P00918	DB00595	-	-
P00918	DB00598	-	-
P00918	DB00778	-	-
P00918	DB00809	-	-
P00918	DB00808	-	-
P00918	DB00807	-	-
P00918	DB00806	-	-
P00918	DB00773	-	-
P00918	DB00804	-	-
P00918	DB00776	-	-
P00918	DB00477	-	-
P00918	DB00472	-	-
P00918	DB00836	-	-
P00918	DB00471	-	-
P00918	DB00577	-	-
P00918	DB00576	-	-
P00918	DB00575	-	-
P00918	DB00573	-	-
P00918	DB00572	-	-
P00918	DB00571	-	-
P00918	DB00479	-	-
P00918	DB00186	-	-
P00918	DB00187	-	-
P00918	DB00169	-	-
P00918	DB00180	-	-
P00918	DB00181	-	-
P00918	DB00871	-	-
P00918	DB00877	-	-
P00918	DB00874	-	-
P00918	DB01128	-	-
P00918	DB01121	-	-
P00918	DB01120	-	-
P00918	DB01127	-	-
P00918	DB01125	-	-
P00918	DB00330	-	-
P00918	DB00238	-	-
P00918	DB00239	-	-
P00918	DB00443	-	-
P00918	DB01087	-	-
P00918	DB00235	-	-
P00918	DB00600	-	-
P00918	DB00602	-	-
P00918	DB00604	-	-
P00918	DB01224	-	-
P00918	DB00627	-	-
P00918	DB01221	-	-
P00918	DB01222	-	-
P00918	DB01223	-	-
P00918	DB00898	-	-
P00918	DB00950	-	-
P00918	DB05260	-	-
P00918	DB01339	-	-
P00918	DB00730	-	-
P00918	DB01026	-	-
P00918	DB01148	-	-
P00918	DB01144	-	-
P00918	DB01147	-	-
P00918	DB01143	-	-
P00918	DB01142	-	-
P00918	DB00143	-	-
P00918	DB01082	-	-
P00918	DB00839	-	-
P00918	DB01086	-	-
P00918	DB00145	-	-
P00918	DB00623	-	-
P00918	DB00620	-	-
P00918	DB01325	-	-
P00918	DB00624	-	-
P00918	DB01242	-	-
P00918	DB01241	-	-
P00918	DB01248	-	-
P00918	DB01394	-	-
P00918	DB01396	-	-
P00918	DB01390	-	-
P00918	DB01392	-	-
P00918	DB01393	-	-
P00918	DB06147	-	-
P00918	DB01399	-	-
P00918	DB00818	-	-
P00918	DB00819	-	-
P00918	DB00762	-	-
P00918	DB00763	-	-
P00918	DB00812	-	-
P00918	DB00761	-	-
P00918	DB00814	-	-
P00918	DB00765	-	-
P00918	DB00568	-	-
P00918	DB00401	-	-
P00918	DB00400	-	-
P00918	DB00406	-	-
P00918	DB00404	-	-
P00918	DB00561	-	-
P00918	DB00563	-	-
P00918	DB00564	-	-
P00918	DB04841	-	-
P00918	DB00567	-	-
P00918	DB00759	-	-
P00918	DB01426	-	-
P00918	DB00887	-	-
P00918	DB00884	-	-
P00918	DB00968	-	-
P00918	DB00969	-	-
P00918	DB00881	-	-
P00918	DB06148	-	-
P00918	DB00967	-	-
P00918	DB00960	-	-
P00918	DB00961	-	-
P00918	DB00889	-	-
P00918	DB00963	-	-
P00918	DB06729	-	-
P00918	DB00249	-	-
P00918	DB01021	-	-
P00918	DB00717	-	-
P00918	DB00715	-	-
P00918	DB00242	-	-
P00918	DB00245	-	-
P00918	DB00712	-	-
P00918	DB00247	-	-
P00918	DB00367	-	-
P00918	DB00365	-	-
P00918	DB00363	-	-
P00918	DB00361	-	-
P00918	DB01024	-	-
P00918	DB03166	-	-
P00918	DB01020	-	-
P00918	DB00614	-	-
P00918	DB00615	-	-
P00918	DB01211	-	-
P00918	DB01210	-	-
P00918	DB01213	-	-
P00918	DB00619	-	-
P00918	DB01217	-	-
P00918	DB01216	-	-
P00918	DB06698	-	-
P00918	DB01188	-	-
P00918	DB01627	-	-
P00918	DB01181	-	-
P00918	DB06691	-	-
P00918	DB01183	-	-
P00918	DB01182	-	-
P00918	DB01184	-	-
P00918	DB06697	-	-
P00918	DB00685	-	-
P00918	DB06218	-	-
P00918	DB00811	-	-
P00918	DB01029	-	-
P00918	DB00760	-	-
P00918	DB08807	-	-
P00918	DB04838	-	-
P00918	DB01599	-	-
P00918	DB01044	-	-
P00918	DB01045	-	-
P00918	DB00104	-	-
P00918	DB01047	-	-
P00918	DB01041	-	-
P00918	DB01042	-	-
P00918	DB00661	-	-
P00918	DB00669	-	-
P00918	DB00668	-	-
P00918	DB00583	-	-
P00918	DB00586	-	-
P00918	DB00584	-	-
P00918	DB00585	-	-
P00918	DB08797	-	-
P00918	DB00589	-	-
P00918	DB00339	-	-
P00918	DB00724	-	-
P00918	DB00725	-	-
P00918	DB00722	-	-
P00918	DB00721	-	-
P00918	DB00331	-	-
P00918	DB00446	-	-
P00918	DB00445	-	-
P00918	DB00335	-	-
P00918	DB00334	-	-
P00918	DB00441	-	-
P00918	DB01168	-	-
P00918	DB01136	-	-
P00918	DB01137	-	-
P00918	DB01132	-	-
P00918	DB01206	-	-
P00918	DB00207	-	-
P00918	DB00206	-	-
P00918	DB00201	-	-
P00918	DB00202	-	-
P00918	DB00208	-	-
P00918	DB06770	-	-
P09917	-	TAXID:36610	Quercetin
P09917	-	TAXID:36610	Kaempferol
P09917	-	TAXID:74900	Quercetin
P09917	-	TAXID:74900	Protocatechuic Acid
P09917	-	TAXID:74900	Kaempferol
P09917	-	TAXID:74900	Caffeic Acid
P09917	-	TAXID:51240	Protocatechuic Acid
P09917	-	TAXID:51240	Caffeic Acid
P09917	-	TAXID:4081	Quercetin
P09917	-	TAXID:4222	Quercetin
P09917	-	TAXID:4577	Quercetin
P09917	-	TAXID:4577	Kaempferol
P09917	-	TAXID:4577	Caffeic Acid
P09917	-	TAXID:29760	Quercetin
P09917	-	TAXID:29760	Caffeic Acid
P09917	-	TAXID:4006	Pinoresinol
P09917	-	TAXID:3712	Quercetin
P09917	-	TAXID:3712	Kaempferol
P09917	-	TAXID:3712	Caffeic Acid
P09917	-	TAXID:114280	Quercetin
P09917	-	TAXID:114280	Protocatechuic Acid
P09917	-	TAXID:114280	Caffeic Acid
P09917	-	TAXID:4045	Quercetin
P09917	-	TAXID:4045	Kaempferol
P09917	-	TAXID:4045	Caffeic Acid
P09917	-	TAXID:4679	Quercetin
P09917	-	TAXID:4679	Protocatechuic Acid
P09917	-	TAXID:4679	Kaempferol
P09917	-	TAXID:4047	Quercetin
P09917	-	TAXID:4047	Kaempferol
P09917	-	TAXID:4120	Caffeic Acid
P09917	-	TAXID:4530	Quercetin
P09917	-	TAXID:4530	Guaiacol
P09917	-	TAXID:4530	Kaempferol
P09917	-	TAXID:171929	Guaiacol
P09917	-	TAXID:175228	Quercetin
P09917	-	TAXID:175228	Protocatechuic Acid
P09917	-	TAXID:3635	Guaiacol
P09917	-	TAXID:32224	Protocatechuic Acid
P09917	-	TAXID:4146	Quercetin
P09917	-	TAXID:4146	Kaempferol
P09917	-	TAXID:4146	Caffeic Acid
P09917	-	TAXID:65948	Caffeic Acid
P09917	-	TAXID:3469	Quercetin
P09917	-	TAXID:3469	Kaempferol
P09917	-	TAXID:3864	Caffeic Acid
P09917	-	TAXID:3864	Gentisic Acid
P09917	-	TAXID:3621	Protocatechuic Acid
P09917	-	TAXID:3621	Caffeic Acid
P09917	-	TAXID:29780	Quercetin
P09917	-	TAXID:29780	Protocatechuic Acid
P09917	-	TAXID:29780	Kaempferol
P09917	-	TAXID:29780	Caffeic Acid
P09917	-	TAXID:29780	Gentisic Acid
P09917	-	TAXID:3747	Guaiacol
P09917	-	TAXID:3747	Protocatechuic Acid
P09917	-	TAXID:3747	Kaempferol
P09917	-	TAXID:3747	Caffeic Acid
P09917	-	TAXID:3747	Quercetin
P09917	-	TAXID:3747	Gentisic Acid
P09917	-	TAXID:3617	Quercetin
P09917	-	TAXID:13731	Guaiacol
P09917	-	TAXID:3708	Quercetin
P09917	-	TAXID:3708	Thiouracil
P09917	-	TAXID:3708	Kaempferol
P09917	-	TAXID:3708	Caffeic Acid
P09917	-	TAXID:32247	Quercetin
P09917	-	TAXID:32247	Kaempferol
P09917	-	TAXID:4682	Quercetin
P09917	-	TAXID:4681	Quercetin
P09917	-	TAXID:4681	Protocatechuic Acid
P09917	-	TAXID:4681	Kaempferol
P09917	-	TAXID:4681	Caffeic Acid
P09917	-	TAXID:4513	Caffeic Acid
P09917	-	TAXID:49827	Nordihydroguaiaretic Acid
P09917	-	TAXID:49827	Caffeic Acid
P09917	-	TAXID:35925	Quercetin
P09917	-	TAXID:35925	Kaempferol
P09917	-	TAXID:35925	Caffeic Acid
P09917	-	TAXID:3888	Quercetin
P09917	-	TAXID:3888	Kaempferol
P09917	-	TAXID:4565	Quercetin
P09917	-	TAXID:4565	Guaiacol
P09917	-	TAXID:3983	Pinoresinol
P09917	-	TAXID:3983	Scopoletin
P09917	-	TAXID:3983	Protocatechuic Acid
P09917	-	TAXID:4236	Quercetin
P09917	-	TAXID:4236	Pyrocatechol
P09917	-	TAXID:151069	Protocatechuic Acid
P09917	-	TAXID:151069	Kaempferol
P09917	-	TAXID:151069	Gentisic Acid
P09917	-	TAXID:3885	Quercetin
P09917	-	TAXID:128608	Caffeic Acid
P09917	-	TAXID:4072	Quercetin
P09917	-	TAXID:4072	Honokiol
P09917	-	TAXID:4072	4-Methoxyhonokiol
P09917	-	TAXID:180772	Quercetin
P09917	-	TAXID:180772	Kaempferol
P09917	-	TAXID:13427	Quercetin
P09917	-	TAXID:13427	Scopoletin
P09917	-	TAXID:13427	Caffeic Acid
P09917	-	TAXID:94328	Honokiol
P09917	-	TAXID:4442	Quercetin
P09917	-	TAXID:4442	Guaiacol
P09917	-	TAXID:4442	Kaempferol
P09917	-	TAXID:4442	Caffeic Acid
P09917	-	TAXID:13216	Pyrocatechol
P09917	-	TAXID:4498	Scopoletin
P09917	-	TAXID:4498	Caffeic Acid
P09917	-	TAXID:48038	Quercetin
P09917	-	TAXID:48038	Kaempferol
P09917	-	TAXID:120290	Quercetin
P09917	-	TAXID:120290	Kaempferol
P09917	-	TAXID:120290	Caffeic Acid
P09917	-	TAXID:74645	Quercetin
P09917	-	TAXID:74645	Kaempferol
P09917	-	TAXID:22663	Quercetin
P09917	-	TAXID:3847	Quercetin
P09917	-	TAXID:3847	Kaempferol
P09917	-	TAXID:3711	Quercetin
P09917	-	TAXID:3711	Kaempferol
P09917	-	TAXID:3711	Caffeic Acid
P09917	-	TAXID:3659	Quercetin
P09917	-	TAXID:3659	Kaempferol
P09917	-	TAXID:50225	Quercetin
P09917	-	TAXID:4113	Protocatechuic Acid
P09917	-	TAXID:4113	Caffeic Acid
P09917	-	TAXID:4111	Guaiacol
P09917	-	TAXID:4111	Caffeic Acid
P09917	DB00179	-	-
P09917	DB00788	-	-
P09917	DB01009	-	-
P09917	DB00744	-	-
P09917	DB00341	-	-
P09917	DB00233	-	-
P09917	DB00920	-	-
P09917	DB00328	-	-
P09917	DB01050	-	-
P09917	DB00551	-	-
P09917	DB01243	-	-
P09917	DB00936	-	-
P09917	DB00482	-	-
P09917	DB00967	-	-
P09917	DB00455	-	-
P16083	-	TAXID:3711	Resveratrol
P16083	-	TAXID:4565	Resveratrol
P16083	-	TAXID:180772	Resveratrol
P16083	-	TAXID:3818	Resveratrol
P16083	-	TAXID:29760	Resveratrol
P16083	-	TAXID:3621	Resveratrol
P16083	-	TAXID:4081	Resveratrol
P16083	-	TAXID:175228	Resveratrol
P16083	-	TAXID:4442	Resveratrol
P16083	-	TAXID:3747	Resveratrol
P16083	DB01087	-	-
P16083	DB00608	-	-
P16083	DB00619	-	-
P16083	DB01065	-	-
P16083	DB01162	-	-
P16083	DB00457	-	-
O43570	-	TAXID:65948	Caffeic Acid
O43570	-	TAXID:74900	P-Coumaric Acid
O43570	-	TAXID:74900	Quercetin
O43570	-	TAXID:74900	Protocatechuic Acid
O43570	-	TAXID:74900	Caffeic Acid
O43570	-	TAXID:74900	P-Hydroxybenzoic Acid
O43570	-	TAXID:51240	Protocatechuic Acid
O43570	-	TAXID:51240	Caffeic Acid
O43570	-	TAXID:51240	P-Hydroxybenzoic Acid
O43570	-	TAXID:58860	(+)-Catechin
O43570	-	TAXID:4081	Quercetin
O43570	-	TAXID:4081	Resveratrol
O43570	-	TAXID:4081	Spermine
O43570	-	TAXID:4081	P-Hydroxybenzoic Acid
O43570	-	TAXID:4442	Tea Polyphenol
O43570	-	TAXID:4442	Quercetin
O43570	-	TAXID:4442	Resveratrol
O43570	-	TAXID:4442	(+)-Catechin
O43570	-	TAXID:4442	Caffeic Acid
O43570	-	TAXID:4577	P-Coumaric Acid
O43570	-	TAXID:4577	Spermine
O43570	-	TAXID:4577	Caffeic Acid
O43570	-	TAXID:4577	Quercetin
O43570	-	TAXID:4577	Tyrosine
O43570	-	TAXID:4577	Tryptophan
O43570	-	TAXID:13894	P-Hydroxybenzoic Acid
O43570	-	TAXID:29760	(+)-Catechin
O43570	-	TAXID:29760	Quercetin
O43570	-	TAXID:29760	Resveratrol
O43570	-	TAXID:29760	Caffeic Acid
O43570	-	TAXID:157791	Tryptophan
O43570	-	TAXID:35925	(+)-Catechin
O43570	-	TAXID:35925	Quercetin
O43570	-	TAXID:35925	Caffeic Acid
O43570	-	TAXID:114280	P-Coumaric Acid
O43570	-	TAXID:114280	Quercetin
O43570	-	TAXID:114280	Protocatechuic Acid
O43570	-	TAXID:114280	Caffeic Acid
O43570	-	TAXID:114280	P-Hydroxybenzoic Acid
O43570	-	TAXID:4045	P-Coumaric Acid
O43570	-	TAXID:4045	Quercetin
O43570	-	TAXID:4045	Tryptophan
O43570	-	TAXID:4045	Caffeic Acid
O43570	-	TAXID:4045	Ferulate
O43570	-	TAXID:4679	Quercetin
O43570	-	TAXID:4679	Tyrosine
O43570	-	TAXID:4679	Protocatechuic Acid
O43570	-	TAXID:4679	Tryptophan
O43570	-	TAXID:4047	Quercetin
O43570	-	TAXID:4120	Caffeic Acid
O43570	-	TAXID:4530	Histidine
O43570	-	TAXID:4530	Tyrosine
O43570	-	TAXID:4530	Quercetin
O43570	-	TAXID:4530	P-Hydroxybenzoic Acid
O43570	-	TAXID:4530	Ferulate
O43570	-	TAXID:41241	(+)-Catechin
O43570	-	TAXID:3708	Quercetin
O43570	-	TAXID:3708	Caffeic Acid
O43570	-	TAXID:3708	Tryptophan
O43570	-	TAXID:3708	P-Hydroxybenzoic Acid
O43570	-	TAXID:3708	Ferulate
O43570	-	TAXID:3641	(+)-Catechin
O43570	-	TAXID:175228	P-Coumaric Acid
O43570	-	TAXID:175228	Resveratrol
O43570	-	TAXID:175228	Protocatechuic Acid
O43570	-	TAXID:175228	Flavon-3-Ol
O43570	-	TAXID:175228	P-Hydroxybenzoic Acid
O43570	-	TAXID:175228	Quercetin
O43570	-	TAXID:4550	P-Coumaric Acid
O43570	-	TAXID:32224	P-Coumaric Acid
O43570	-	TAXID:32224	Tea Polyphenol
O43570	-	TAXID:32224	Protocatechuic Acid
O43570	-	TAXID:32224	(+)-Catechin
O43570	-	TAXID:4146	P-Coumaric Acid
O43570	-	TAXID:4146	Quercetin
O43570	-	TAXID:4146	Caffeic Acid
O43570	-	TAXID:3469	Quercetin
O43570	-	TAXID:3469	Tyrosine
O43570	-	TAXID:3864	(+)-Catechin
O43570	-	TAXID:3864	Caffeic Acid
O43570	-	TAXID:3864	P-Hydroxybenzoic Acid
O43570	-	TAXID:3621	P-Coumaric Acid
O43570	-	TAXID:3621	Resveratrol
O43570	-	TAXID:3621	Protocatechuic Acid
O43570	-	TAXID:3621	Caffeic Acid
O43570	-	TAXID:3621	P-Hydroxybenzoic Acid
O43570	-	TAXID:29780	Ellagic Acid
O43570	-	TAXID:29780	Quercetin
O43570	-	TAXID:29780	(+)-Catechin
O43570	-	TAXID:29780	Protocatechuic Acid
O43570	-	TAXID:29780	Caffeic Acid
O43570	-	TAXID:4006	Syringic Acid
O43570	-	TAXID:3435	(+)-Catechin
O43570	-	TAXID:3435	Spermine
O43570	-	TAXID:48038	Quercetin
O43570	-	TAXID:32247	Ellagic Acid
O43570	-	TAXID:32247	Quercetin
O43570	-	TAXID:4682	P-Coumaric Acid
O43570	-	TAXID:4682	Quercetin
O43570	-	TAXID:4682	Tryptophan
O43570	-	TAXID:3818	3,5-Dihydroxybenzoic Acid
O43570	-	TAXID:3818	Resveratrol
O43570	-	TAXID:4681	P-Coumaric Acid
O43570	-	TAXID:4681	Quercetin
O43570	-	TAXID:4681	Protocatechuic Acid
O43570	-	TAXID:4681	Caffeic Acid
O43570	-	TAXID:4681	P-Hydroxybenzoic Acid
O43570	-	TAXID:4513	(+)-Catechin
O43570	-	TAXID:4513	Syringic Acid
O43570	-	TAXID:4513	Caffeic Acid
O43570	-	TAXID:49827	Caffeic Acid
O43570	-	TAXID:3747	P-Coumaric Acid
O43570	-	TAXID:3747	Resveratrol
O43570	-	TAXID:3747	Protocatechuic Acid
O43570	-	TAXID:3747	Caffeic Acid
O43570	-	TAXID:3747	(+)-Catechin
O43570	-	TAXID:3747	P-Hydroxybenzoic Acid
O43570	-	TAXID:3747	Ellagic Acid
O43570	-	TAXID:3747	Quercetin
O43570	-	TAXID:3747	Tyrosine
O43570	-	TAXID:3562	Histidine
O43570	-	TAXID:3562	Tryptophan
O43570	-	TAXID:3888	Histidine
O43570	-	TAXID:3888	Tyrosine
O43570	-	TAXID:3888	Tryptophan
O43570	-	TAXID:3888	Quercetin
O43570	-	TAXID:4565	Quercetin
O43570	-	TAXID:4565	Resveratrol
O43570	-	TAXID:4565	Sodium Diethyldithiocarbamate
O43570	-	TAXID:3983	P-Coumaric Acid
O43570	-	TAXID:3983	Protocatechuic Acid
O43570	-	TAXID:4236	Pyrocatechol
O43570	-	TAXID:4236	P-Hydroxybenzoic Acid
O43570	-	TAXID:4236	Quercetin
O43570	-	TAXID:171929	Tea Polyphenol
O43570	-	TAXID:151069	Ellagic Acid
O43570	-	TAXID:151069	(+)-Catechin
O43570	-	TAXID:151069	Protocatechuic Acid
O43570	-	TAXID:50225	Quercetin
O43570	-	TAXID:3885	Quercetin
O43570	-	TAXID:3885	Tryptophan
O43570	-	TAXID:128608	Caffeic Acid
O43570	-	TAXID:51089	Tyrosine
O43570	-	TAXID:3617	(+)-Catechin
O43570	-	TAXID:3617	Quercetin
O43570	-	TAXID:3617	Tryptophan
O43570	-	TAXID:161934	Silymarin
O43570	-	TAXID:180772	P-Coumaric Acid
O43570	-	TAXID:180772	Quercetin
O43570	-	TAXID:180772	Resveratrol
O43570	-	TAXID:13427	Quercetin
O43570	-	TAXID:13427	Syringic Acid
O43570	-	TAXID:13427	Caffeic Acid
O43570	-	TAXID:4072	Quercetin
O43570	-	TAXID:4222	Quercetin
O43570	-	TAXID:4498	P-Coumaric Acid
O43570	-	TAXID:4498	Caffeic Acid
O43570	-	TAXID:4498	P-Hydroxybenzoic Acid
O43570	-	TAXID:13216	Pyrocatechol
O43570	-	TAXID:120290	Ellagic Acid
O43570	-	TAXID:120290	Quercetin
O43570	-	TAXID:120290	(+)-Catechin
O43570	-	TAXID:120290	Caffeic Acid
O43570	-	TAXID:74645	(+)-Catechin
O43570	-	TAXID:74645	Quercetin
O43570	-	TAXID:22663	Ellagic Acid
O43570	-	TAXID:22663	Quercetin
O43570	-	TAXID:3847	Cadaverine
O43570	-	TAXID:3847	Quercetin
O43570	-	TAXID:3847	Tryptophan
O43570	-	TAXID:3847	(+)-Catechin
O43570	-	TAXID:3711	Quercetin
O43570	-	TAXID:3711	Resveratrol
O43570	-	TAXID:3711	Tryptophan
O43570	-	TAXID:3711	Caffeic Acid
O43570	-	TAXID:3659	Quercetin
O43570	-	TAXID:3712	P-Coumaric Acid
O43570	-	TAXID:3712	Quercetin
O43570	-	TAXID:3712	Caffeic Acid
O43570	-	TAXID:4113	P-Coumaric Acid
O43570	-	TAXID:4113	Protocatechuic Acid
O43570	-	TAXID:4113	Caffeic Acid
O43570	-	TAXID:4113	(+)-Catechin
O43570	-	TAXID:4113	P-Hydroxybenzoic Acid
O43570	-	TAXID:4113	Tyrosine
O43570	-	TAXID:4113	Tryptophan
O43570	-	TAXID:36610	Quercetin
O43570	-	TAXID:4111	P-Coumaric Acid
O43570	-	TAXID:4111	Caffeic Acid
O43570	DB00819	-	-
O43570	DB03255	-	-
O43570	DB00150	-	-
O43570	DB00524	-	-
O43570	DB01144	-	-
O43570	DB00391	-	-
O43570	DB00619	-	-
O43570	DB00653	-	-
O43570	DB00135	-	-
O43570	DB00259	-	-
O43570	DB01235	-	-
O43570	DB00703	-	-
O43570	DB04868	-	-
O43570	DB00695	-	-
O43570	DB00887	-	-
O43570	DB00311	-	-
O43570	DB00310	-	-
O43570	DB00316	-	-
O43570	DB00988	-	-
O43570	DB00869	-	-
O43570	DB06218	-	-
O43570	DB00936	-	-
O43570	DB00273	-	-
O43570	DB00841	-	-
O43570	DB00808	-	-
O43570	DB01325	-	-
O43570	DB00909	-	-
O43570	DB00120	-	-
O43570	DB00127	-	-
O43570	DB01021	-	-
O43570	DB01194	-	-
O43570	DB00668	-	-
O43570	DB00482	-	-
P11388	-	TAXID:120290	Quercetin
P11388	-	TAXID:32247	Quercetin
P11388	-	TAXID:4682	Quercetin
P11388	-	TAXID:3712	Quercetin
P11388	-	TAXID:4681	Quercetin
P11388	-	TAXID:29780	Quercetin
P11388	-	TAXID:29760	Quercetin
P11388	-	TAXID:74900	Quercetin
P11388	-	TAXID:35925	Quercetin
P11388	-	TAXID:3888	Quercetin
P11388	-	TAXID:4442	Fisetin
P11388	-	TAXID:4442	Genistein
P11388	-	TAXID:4442	Quercetin
P11388	-	TAXID:4072	Quercetin
P11388	-	TAXID:4236	Quercetin
P11388	-	TAXID:36610	Quercetin
P11388	-	TAXID:4577	Quercetin
P11388	-	TAXID:175228	Myricetin
P11388	-	TAXID:175228	Quercetin
P11388	-	TAXID:50225	Quercetin
P11388	-	TAXID:3885	Quercetin
P11388	-	TAXID:114280	Quercetin
P11388	-	TAXID:74645	Quercetin
P11388	-	TAXID:4045	Quercetin
P11388	-	TAXID:4679	Quercetin
P11388	-	TAXID:4047	Quercetin
P11388	-	TAXID:180772	Quercetin
P11388	-	TAXID:13427	Quercetin
P11388	-	TAXID:4081	Quercetin
P11388	-	TAXID:4530	Quercetin
P11388	-	TAXID:4565	Quercetin
P11388	-	TAXID:48038	Quercetin
P11388	-	TAXID:3847	Genistein
P11388	-	TAXID:3847	Quercetin
P11388	-	TAXID:4146	Quercetin
P11388	-	TAXID:22663	Myricetin
P11388	-	TAXID:22663	Quercetin
P11388	-	TAXID:3708	Quercetin
P11388	-	TAXID:3469	Quercetin
P11388	-	TAXID:3711	Quercetin
P11388	-	TAXID:3659	Quercetin
P11388	-	TAXID:3747	Quercetin
P11388	-	TAXID:3617	Quercetin
P11388	-	TAXID:4222	Quercetin
P11388	DB00997	-	-
P11388	DB01155	-	-
P11388	DB01051	-	-
P11388	DB00218	-	-
P11388	DB01396	-	-
P11388	DB00537	-	-
P11388	DB01204	-	-
P11388	DB00276	-	-
P11388	DB00445	-	-
P11388	DB00746	-	-
P11388	DB00773	-	-
P11388	DB00694	-	-
P22748	-	TAXID:29760	(+)-Catechin
P22748	-	TAXID:29760	Quercetin
P22748	-	TAXID:29760	Resveratrol
P22748	-	TAXID:29760	Caffeic Acid
P22748	-	TAXID:74900	P-Coumaric Acid
P22748	-	TAXID:74900	Quercetin
P22748	-	TAXID:74900	Protocatechuic Acid
P22748	-	TAXID:74900	Caffeic Acid
P22748	-	TAXID:74900	P-Hydroxybenzoic Acid
P22748	-	TAXID:51240	Protocatechuic Acid
P22748	-	TAXID:51240	Caffeic Acid
P22748	-	TAXID:51240	P-Hydroxybenzoic Acid
P22748	-	TAXID:58860	(+)-Catechin
P22748	-	TAXID:4081	Spermidine
P22748	-	TAXID:4081	Quercetin
P22748	-	TAXID:4081	Resveratrol
P22748	-	TAXID:4081	Spermine
P22748	-	TAXID:4081	P-Hydroxybenzoic Acid
P22748	-	TAXID:4442	Tea Polyphenol
P22748	-	TAXID:4442	Quercetin
P22748	-	TAXID:4442	Resveratrol
P22748	-	TAXID:4442	(+)-Catechin
P22748	-	TAXID:4442	Caffeic Acid
P22748	-	TAXID:4577	P-Coumaric Acid
P22748	-	TAXID:4577	Spermine
P22748	-	TAXID:4577	Caffeic Acid
P22748	-	TAXID:4577	Phosphoserine
P22748	-	TAXID:4577	Quercetin
P22748	-	TAXID:4577	Tyrosine
P22748	-	TAXID:4577	Tryptophan
P22748	-	TAXID:13894	P-Hydroxybenzoic Acid
P22748	-	TAXID:36610	Quercetin
P22748	-	TAXID:4006	Syringic Acid
P22748	-	TAXID:4682	P-Coumaric Acid
P22748	-	TAXID:4682	Quercetin
P22748	-	TAXID:4682	Tryptophan
P22748	-	TAXID:3712	P-Coumaric Acid
P22748	-	TAXID:3712	Quercetin
P22748	-	TAXID:3712	Caffeic Acid
P22748	-	TAXID:114280	P-Coumaric Acid
P22748	-	TAXID:114280	Quercetin
P22748	-	TAXID:114280	Protocatechuic Acid
P22748	-	TAXID:114280	Caffeic Acid
P22748	-	TAXID:114280	P-Hydroxybenzoic Acid
P22748	-	TAXID:4045	P-Coumaric Acid
P22748	-	TAXID:4045	Quercetin
P22748	-	TAXID:4045	Tryptophan
P22748	-	TAXID:4045	Caffeic Acid
P22748	-	TAXID:4045	Ferulate
P22748	-	TAXID:4679	Quercetin
P22748	-	TAXID:4679	Tyrosine
P22748	-	TAXID:4679	Protocatechuic Acid
P22748	-	TAXID:4679	Tryptophan
P22748	-	TAXID:4047	Quercetin
P22748	-	TAXID:4120	Caffeic Acid
P22748	-	TAXID:4530	Ferulate
P22748	-	TAXID:4530	Vinegar
P22748	-	TAXID:4530	P-Hydroxybenzoic Acid
P22748	-	TAXID:4530	Quercetin
P22748	-	TAXID:4530	Histidine
P22748	-	TAXID:4530	Tyrosine
P22748	-	TAXID:171929	Tea Polyphenol
P22748	-	TAXID:3641	(+)-Catechin
P22748	-	TAXID:175228	P-Coumaric Acid
P22748	-	TAXID:175228	Quercetin
P22748	-	TAXID:175228	Resveratrol
P22748	-	TAXID:175228	Protocatechuic Acid
P22748	-	TAXID:175228	P-Hydroxybenzoic Acid
P22748	-	TAXID:4550	P-Coumaric Acid
P22748	-	TAXID:4550	Vinegar
P22748	-	TAXID:89151	Vinegar
P22748	-	TAXID:32224	P-Coumaric Acid
P22748	-	TAXID:32224	Tea Polyphenol
P22748	-	TAXID:32224	Protocatechuic Acid
P22748	-	TAXID:32224	O-Coumaric Acid
P22748	-	TAXID:32224	(+)-Catechin
P22748	-	TAXID:4146	P-Coumaric Acid
P22748	-	TAXID:4146	Quercetin
P22748	-	TAXID:4146	Caffeic Acid
P22748	-	TAXID:65948	Caffeic Acid
P22748	-	TAXID:3469	Quercetin
P22748	-	TAXID:3469	Tyrosine
P22748	-	TAXID:3621	P-Coumaric Acid
P22748	-	TAXID:3621	Resveratrol
P22748	-	TAXID:3621	Protocatechuic Acid
P22748	-	TAXID:3621	Caffeic Acid
P22748	-	TAXID:3621	P-Hydroxybenzoic Acid
P22748	-	TAXID:29780	Ellagic Acid
P22748	-	TAXID:29780	Quercetin
P22748	-	TAXID:29780	(+)-Catechin
P22748	-	TAXID:29780	Protocatechuic Acid
P22748	-	TAXID:29780	Caffeic Acid
P22748	-	TAXID:3617	(+)-Catechin
P22748	-	TAXID:3617	Quercetin
P22748	-	TAXID:3617	Tryptophan
P22748	-	TAXID:3708	Quercetin
P22748	-	TAXID:3708	Caffeic Acid
P22748	-	TAXID:3708	Tryptophan
P22748	-	TAXID:3708	P-Hydroxybenzoic Acid
P22748	-	TAXID:3708	Ferulate
P22748	-	TAXID:3435	(+)-Catechin
P22748	-	TAXID:3435	Spermine
P22748	-	TAXID:120290	Ellagic Acid
P22748	-	TAXID:120290	Quercetin
P22748	-	TAXID:120290	(+)-Catechin
P22748	-	TAXID:120290	Caffeic Acid
P22748	-	TAXID:120290	Foscarnet
P22748	-	TAXID:32247	Ellagic Acid
P22748	-	TAXID:32247	Quercetin
P22748	-	TAXID:32247	Vinegar
P22748	-	TAXID:157791	Vinegar
P22748	-	TAXID:157791	Tryptophan
P22748	-	TAXID:3818	Resveratrol
P22748	-	TAXID:49827	Caffeic Acid
P22748	-	TAXID:4681	P-Coumaric Acid
P22748	-	TAXID:4681	Protocatechuic Acid
P22748	-	TAXID:4681	Caffeic Acid
P22748	-	TAXID:4681	P-Hydroxybenzoic Acid
P22748	-	TAXID:4681	Quercetin
P22748	-	TAXID:4681	Malonic Acid
P22748	-	TAXID:4513	(+)-Catechin
P22748	-	TAXID:4513	Syringic Acid
P22748	-	TAXID:4513	Caffeic Acid
P22748	-	TAXID:4111	P-Coumaric Acid
P22748	-	TAXID:4111	Caffeic Acid
P22748	-	TAXID:35925	(+)-Catechin
P22748	-	TAXID:35925	Quercetin
P22748	-	TAXID:35925	Vinegar
P22748	-	TAXID:35925	Caffeic Acid
P22748	-	TAXID:3747	P-Coumaric Acid
P22748	-	TAXID:3747	Resveratrol
P22748	-	TAXID:3747	Protocatechuic Acid
P22748	-	TAXID:3747	Caffeic Acid
P22748	-	TAXID:3747	(+)-Catechin
P22748	-	TAXID:3747	Vinegar
P22748	-	TAXID:3747	P-Hydroxybenzoic Acid
P22748	-	TAXID:3747	Ellagic Acid
P22748	-	TAXID:3747	Quercetin
P22748	-	TAXID:3747	Tyrosine
P22748	-	TAXID:3562	Histidine
P22748	-	TAXID:3562	Tryptophan
P22748	-	TAXID:3562	Phosphoserine
P22748	-	TAXID:3888	Carbamoyl Phosphate
P22748	-	TAXID:3888	Histidine
P22748	-	TAXID:3888	Quercetin
P22748	-	TAXID:3888	Tyrosine
P22748	-	TAXID:3888	Pyruvic Acid
P22748	-	TAXID:3888	Tryptophan
P22748	-	TAXID:4565	Quercetin
P22748	-	TAXID:4565	Resveratrol
P22748	-	TAXID:4565	Sodium Diethyldithiocarbamate
P22748	-	TAXID:3983	P-Coumaric Acid
P22748	-	TAXID:3983	Protocatechuic Acid
P22748	-	TAXID:4236	Pyrocatechol
P22748	-	TAXID:4236	Vinegar
P22748	-	TAXID:4236	P-Hydroxybenzoic Acid
P22748	-	TAXID:4236	Quercetin
P22748	-	TAXID:151069	Ellagic Acid
P22748	-	TAXID:151069	(+)-Catechin
P22748	-	TAXID:151069	Protocatechuic Acid
P22748	-	TAXID:41241	(+)-Catechin
P22748	-	TAXID:3885	Quercetin
P22748	-	TAXID:3885	Tryptophan
P22748	-	TAXID:128608	Caffeic Acid
P22748	-	TAXID:51089	Tyrosine
P22748	-	TAXID:4072	Quercetin
P22748	-	TAXID:4072	Vinegar
P22748	-	TAXID:161934	Silymarin
P22748	-	TAXID:180772	P-Coumaric Acid
P22748	-	TAXID:180772	Quercetin
P22748	-	TAXID:180772	Resveratrol
P22748	-	TAXID:13427	Quercetin
P22748	-	TAXID:13427	Syringic Acid
P22748	-	TAXID:13427	Caffeic Acid
P22748	-	TAXID:4222	Quercetin
P22748	-	TAXID:4498	P-Coumaric Acid
P22748	-	TAXID:4498	Caffeic Acid
P22748	-	TAXID:4498	P-Hydroxybenzoic Acid
P22748	-	TAXID:13216	Pyrocatechol
P22748	-	TAXID:13216	Vinegar
P22748	-	TAXID:48038	Quercetin
P22748	-	TAXID:74645	(+)-Catechin
P22748	-	TAXID:74645	Quercetin
P22748	-	TAXID:22663	Ellagic Acid
P22748	-	TAXID:22663	Quercetin
P22748	-	TAXID:3847	Cadaverine
P22748	-	TAXID:3847	Quercetin
P22748	-	TAXID:3847	Tryptophan
P22748	-	TAXID:3847	(+)-Catechin
P22748	-	TAXID:3711	Spermidine
P22748	-	TAXID:3711	Quercetin
P22748	-	TAXID:3711	Resveratrol
P22748	-	TAXID:3711	Tryptophan
P22748	-	TAXID:3711	Caffeic Acid
P22748	-	TAXID:3659	Quercetin
P22748	-	TAXID:50225	Quercetin
P22748	-	TAXID:4113	P-Coumaric Acid
P22748	-	TAXID:4113	Protocatechuic Acid
P22748	-	TAXID:4113	Caffeic Acid
P22748	-	TAXID:4113	(+)-Catechin
P22748	-	TAXID:4113	Vinegar
P22748	-	TAXID:4113	P-Hydroxybenzoic Acid
P22748	-	TAXID:4113	Tyrosine
P22748	-	TAXID:4113	Tryptophan
P22748	-	TAXID:3864	(+)-Catechin
P22748	-	TAXID:3864	Caffeic Acid
P22748	-	TAXID:3864	P-Hydroxybenzoic Acid
P22748	DB00819	-	-
P22748	DB03255	-	-
P22748	DB00529	-	-
P22748	DB00150	-	-
P22748	DB00524	-	-
P22748	DB01144	-	-
P22748	DB00619	-	-
P22748	DB00653	-	-
P22748	DB00258	-	-
P22748	DB00259	-	-
P22748	DB01235	-	-
P22748	DB00703	-	-
P22748	DB04868	-	-
P22748	DB00695	-	-
P22748	DB00887	-	-
P22748	DB00311	-	-
P22748	DB00310	-	-
P22748	DB00316	-	-
P22748	DB00988	-	-
P22748	DB00869	-	-
P22748	DB06218	-	-
P22748	DB00936	-	-
P22748	DB00273	-	-
P22748	DB06768	-	-
P22748	DB00841	-	-
P22748	DB00761	-	-
P22748	DB00808	-	-
P22748	DB01325	-	-
P22748	DB00909	-	-
P22748	DB00120	-	-
P22748	DB00551	-	-
P22748	DB01020	-	-
P22748	DB01021	-	-
P22748	DB01005	-	-
P22748	DB01194	-	-
P22748	DB00668	-	-
P22748	DB00135	-	-
P22748	DB01390	-	-
P22748	DB00127	-	-
P22748	DB06715	-	-
P22748	DB00482	-	-
P22748	DB03166	-	-
Q9ULX7	-	TAXID:65948	Caffeic Acid
Q9ULX7	-	TAXID:4565	Quercetin
Q9ULX7	-	TAXID:4565	Resveratrol
Q9ULX7	-	TAXID:74900	P-Coumaric Acid
Q9ULX7	-	TAXID:74900	Quercetin
Q9ULX7	-	TAXID:74900	Caffeic Acid
Q9ULX7	-	TAXID:74900	P-Hydroxybenzoic Acid
Q9ULX7	-	TAXID:51240	Caffeic Acid
Q9ULX7	-	TAXID:51240	P-Hydroxybenzoic Acid
Q9ULX7	-	TAXID:58860	(+)-Catechin
Q9ULX7	-	TAXID:4081	Resveratrol
Q9ULX7	-	TAXID:4081	Serotonin
Q9ULX7	-	TAXID:4081	Spermine
Q9ULX7	-	TAXID:4081	Spermidine
Q9ULX7	-	TAXID:4081	P-Hydroxybenzoic Acid
Q9ULX7	-	TAXID:4081	Quercetin
Q9ULX7	-	TAXID:4222	Quercetin
Q9ULX7	-	TAXID:4222	Serotonin
Q9ULX7	-	TAXID:4577	P-Coumaric Acid
Q9ULX7	-	TAXID:4577	Spermine
Q9ULX7	-	TAXID:4577	Caffeic Acid
Q9ULX7	-	TAXID:4577	Quercetin
Q9ULX7	-	TAXID:4577	Tyrosine
Q9ULX7	-	TAXID:4577	Tryptophan
Q9ULX7	-	TAXID:13894	P-Hydroxybenzoic Acid
Q9ULX7	-	TAXID:29760	(+)-Catechin
Q9ULX7	-	TAXID:29760	Quercetin
Q9ULX7	-	TAXID:29760	Resveratrol
Q9ULX7	-	TAXID:29760	Caffeic Acid
Q9ULX7	-	TAXID:157791	Tryptophan
Q9ULX7	-	TAXID:35925	(+)-Catechin
Q9ULX7	-	TAXID:35925	Quercetin
Q9ULX7	-	TAXID:35925	Caffeic Acid
Q9ULX7	-	TAXID:114280	P-Coumaric Acid
Q9ULX7	-	TAXID:114280	Quercetin
Q9ULX7	-	TAXID:114280	Caffeic Acid
Q9ULX7	-	TAXID:114280	P-Hydroxybenzoic Acid
Q9ULX7	-	TAXID:4045	P-Coumaric Acid
Q9ULX7	-	TAXID:4045	Quercetin
Q9ULX7	-	TAXID:4045	Tryptophan
Q9ULX7	-	TAXID:4045	Caffeic Acid
Q9ULX7	-	TAXID:4045	Ferulate
Q9ULX7	-	TAXID:4679	Quercetin
Q9ULX7	-	TAXID:4679	Tyrosine
Q9ULX7	-	TAXID:4679	Tryptophan
Q9ULX7	-	TAXID:4047	Quercetin
Q9ULX7	-	TAXID:4120	Caffeic Acid
Q9ULX7	-	TAXID:4530	Histidine
Q9ULX7	-	TAXID:4530	Tyrosine
Q9ULX7	-	TAXID:4530	Quercetin
Q9ULX7	-	TAXID:4530	P-Hydroxybenzoic Acid
Q9ULX7	-	TAXID:4530	Ferulate
Q9ULX7	-	TAXID:41241	(+)-Catechin
Q9ULX7	-	TAXID:4681	P-Coumaric Acid
Q9ULX7	-	TAXID:4681	Quercetin
Q9ULX7	-	TAXID:4681	Caffeic Acid
Q9ULX7	-	TAXID:4681	P-Hydroxybenzoic Acid
Q9ULX7	-	TAXID:3641	(+)-Catechin
Q9ULX7	-	TAXID:175228	P-Coumaric Acid
Q9ULX7	-	TAXID:175228	Quercetin
Q9ULX7	-	TAXID:175228	Resveratrol
Q9ULX7	-	TAXID:175228	P-Hydroxybenzoic Acid
Q9ULX7	-	TAXID:4550	P-Coumaric Acid
Q9ULX7	-	TAXID:32224	P-Coumaric Acid
Q9ULX7	-	TAXID:32224	Tea Polyphenol
Q9ULX7	-	TAXID:32224	(+)-Catechin
Q9ULX7	-	TAXID:4146	P-Coumaric Acid
Q9ULX7	-	TAXID:4146	Quercetin
Q9ULX7	-	TAXID:4146	Caffeic Acid
Q9ULX7	-	TAXID:3469	Quercetin
Q9ULX7	-	TAXID:3469	Tyrosine
Q9ULX7	-	TAXID:3864	(+)-Catechin
Q9ULX7	-	TAXID:3864	Caffeic Acid
Q9ULX7	-	TAXID:3864	P-Hydroxybenzoic Acid
Q9ULX7	-	TAXID:3621	P-Coumaric Acid
Q9ULX7	-	TAXID:3621	Resveratrol
Q9ULX7	-	TAXID:3621	Caffeic Acid
Q9ULX7	-	TAXID:3621	P-Hydroxybenzoic Acid
Q9ULX7	-	TAXID:29780	Ellagic Acid
Q9ULX7	-	TAXID:29780	Quercetin
Q9ULX7	-	TAXID:29780	(+)-Catechin
Q9ULX7	-	TAXID:29780	Caffeic Acid
Q9ULX7	-	TAXID:4006	Syringic Acid
Q9ULX7	-	TAXID:3435	(+)-Catechin
Q9ULX7	-	TAXID:3435	Spermine
Q9ULX7	-	TAXID:48038	Quercetin
Q9ULX7	-	TAXID:32247	Ellagic Acid
Q9ULX7	-	TAXID:32247	Quercetin
Q9ULX7	-	TAXID:4682	P-Coumaric Acid
Q9ULX7	-	TAXID:4682	Quercetin
Q9ULX7	-	TAXID:4682	Tryptophan
Q9ULX7	-	TAXID:3818	Resveratrol
Q9ULX7	-	TAXID:4513	(+)-Catechin
Q9ULX7	-	TAXID:4513	Syringic Acid
Q9ULX7	-	TAXID:4513	Caffeic Acid
Q9ULX7	-	TAXID:49827	Caffeic Acid
Q9ULX7	-	TAXID:3747	P-Coumaric Acid
Q9ULX7	-	TAXID:3747	Resveratrol
Q9ULX7	-	TAXID:3747	Caffeic Acid
Q9ULX7	-	TAXID:3747	(+)-Catechin
Q9ULX7	-	TAXID:3747	P-Hydroxybenzoic Acid
Q9ULX7	-	TAXID:3747	Ellagic Acid
Q9ULX7	-	TAXID:3747	Quercetin
Q9ULX7	-	TAXID:3747	Tyrosine
Q9ULX7	-	TAXID:51089	Tyrosine
Q9ULX7	-	TAXID:3888	Histidine
Q9ULX7	-	TAXID:3888	Tyrosine
Q9ULX7	-	TAXID:3888	Tryptophan
Q9ULX7	-	TAXID:3888	Quercetin
Q9ULX7	-	TAXID:3708	Quercetin
Q9ULX7	-	TAXID:3708	Caffeic Acid
Q9ULX7	-	TAXID:3708	Tryptophan
Q9ULX7	-	TAXID:3708	P-Hydroxybenzoic Acid
Q9ULX7	-	TAXID:3708	Ferulate
Q9ULX7	-	TAXID:94328	Serotonin
Q9ULX7	-	TAXID:4236	Pyrocatechol
Q9ULX7	-	TAXID:4236	P-Hydroxybenzoic Acid
Q9ULX7	-	TAXID:4236	Quercetin
Q9ULX7	-	TAXID:171929	Tea Polyphenol
Q9ULX7	-	TAXID:151069	Ellagic Acid
Q9ULX7	-	TAXID:151069	(+)-Catechin
Q9ULX7	-	TAXID:50225	Quercetin
Q9ULX7	-	TAXID:3885	Quercetin
Q9ULX7	-	TAXID:3885	Tryptophan
Q9ULX7	-	TAXID:128608	Caffeic Acid
Q9ULX7	-	TAXID:74645	(+)-Catechin
Q9ULX7	-	TAXID:74645	Quercetin
Q9ULX7	-	TAXID:3562	Histidine
Q9ULX7	-	TAXID:3562	Tryptophan
Q9ULX7	-	TAXID:3712	P-Coumaric Acid
Q9ULX7	-	TAXID:3712	Quercetin
Q9ULX7	-	TAXID:3712	Caffeic Acid
Q9ULX7	-	TAXID:161934	Silymarin
Q9ULX7	-	TAXID:180772	P-Coumaric Acid
Q9ULX7	-	TAXID:180772	Quercetin
Q9ULX7	-	TAXID:180772	Resveratrol
Q9ULX7	-	TAXID:13427	Quercetin
Q9ULX7	-	TAXID:13427	Syringic Acid
Q9ULX7	-	TAXID:13427	Caffeic Acid
Q9ULX7	-	TAXID:4072	Quercetin
Q9ULX7	-	TAXID:4442	Tea Polyphenol
Q9ULX7	-	TAXID:4442	Quercetin
Q9ULX7	-	TAXID:4442	Resveratrol
Q9ULX7	-	TAXID:4442	(+)-Catechin
Q9ULX7	-	TAXID:4442	Caffeic Acid
Q9ULX7	-	TAXID:4498	P-Coumaric Acid
Q9ULX7	-	TAXID:4498	Caffeic Acid
Q9ULX7	-	TAXID:4498	P-Hydroxybenzoic Acid
Q9ULX7	-	TAXID:13216	Pyrocatechol
Q9ULX7	-	TAXID:120290	Ellagic Acid
Q9ULX7	-	TAXID:120290	Quercetin
Q9ULX7	-	TAXID:120290	(+)-Catechin
Q9ULX7	-	TAXID:120290	Caffeic Acid
Q9ULX7	-	TAXID:3983	P-Coumaric Acid
Q9ULX7	-	TAXID:22663	Ellagic Acid
Q9ULX7	-	TAXID:22663	Quercetin
Q9ULX7	-	TAXID:3847	Cadaverine
Q9ULX7	-	TAXID:3847	Quercetin
Q9ULX7	-	TAXID:3847	Tryptophan
Q9ULX7	-	TAXID:3847	(+)-Catechin
Q9ULX7	-	TAXID:3711	Spermidine
Q9ULX7	-	TAXID:3711	Quercetin
Q9ULX7	-	TAXID:3711	Resveratrol
Q9ULX7	-	TAXID:3711	Tryptophan
Q9ULX7	-	TAXID:3711	Caffeic Acid
Q9ULX7	-	TAXID:3659	Quercetin
Q9ULX7	-	TAXID:3617	(+)-Catechin
Q9ULX7	-	TAXID:3617	Quercetin
Q9ULX7	-	TAXID:3617	Tryptophan
Q9ULX7	-	TAXID:4113	P-Coumaric Acid
Q9ULX7	-	TAXID:4113	Serotonin
Q9ULX7	-	TAXID:4113	Caffeic Acid
Q9ULX7	-	TAXID:4113	(+)-Catechin
Q9ULX7	-	TAXID:4113	P-Hydroxybenzoic Acid
Q9ULX7	-	TAXID:4113	Tyrosine
Q9ULX7	-	TAXID:4113	Tryptophan
Q9ULX7	-	TAXID:36610	Quercetin
Q9ULX7	-	TAXID:4111	P-Coumaric Acid
Q9ULX7	-	TAXID:4111	Caffeic Acid
Q9ULX7	DB00819	-	-
Q9ULX7	DB03255	-	-
Q9ULX7	DB00150	-	-
Q9ULX7	DB00524	-	-
Q9ULX7	DB01144	-	-
Q9ULX7	DB00619	-	-
Q9ULX7	DB00135	-	-
Q9ULX7	DB00259	-	-
Q9ULX7	DB01235	-	-
Q9ULX7	DB00703	-	-
Q9ULX7	DB04868	-	-
Q9ULX7	DB00695	-	-
Q9ULX7	DB00887	-	-
Q9ULX7	DB00311	-	-
Q9ULX7	DB00310	-	-
Q9ULX7	DB00316	-	-
Q9ULX7	DB00988	-	-
Q9ULX7	DB00869	-	-
Q9ULX7	DB06218	-	-
Q9ULX7	DB00936	-	-
Q9ULX7	DB00273	-	-
Q9ULX7	DB00841	-	-
Q9ULX7	DB00808	-	-
Q9ULX7	DB01325	-	-
Q9ULX7	DB00909	-	-
Q9ULX7	DB00120	-	-
Q9ULX7	DB00127	-	-
Q9ULX7	DB01021	-	-
Q9ULX7	DB01194	-	-
Q9ULX7	DB00668	-	-
Q9ULX7	DB00482	-	-
P30542	-	TAXID:4442	Caffeine
P30542	-	TAXID:3847	Adenylate
P30542	-	TAXID:4530	Adenylate
P30542	-	TAXID:4565	Adenylate
P30542	-	TAXID:3708	Adenylate
P30542	-	TAXID:3641	Caffeine
P30542	DB01064	-	-
P30542	DB01097	-	-
P30542	DB00153	-	-
P30542	DB00709	-	-
P30542	DB00258	-	-
P30542	DB00259	-	-
P30542	DB00252	-	-
P30542	DB00701	-	-
P30542	DB00251	-	-
P30542	DB00704	-	-
P30542	DB00257	-	-
P30542	DB00254	-	-
P30542	DB00255	-	-
P30542	DB00313	-	-
P30542	DB00310	-	-
P30542	DB00316	-	-
P30542	DB00091	-	-
P30542	DB00319	-	-
P30542	DB00478	-	-
P30542	DB00570	-	-
P30542	DB00882	-	-
P30542	DB01156	-	-
P30542	DB01151	-	-
P30542	DB00650	-	-
P30542	DB00227	-	-
P30542	DB00224	-	-
P30542	DB00222	-	-
P30542	DB00220	-	-
P30542	DB00962	-	-
P30542	DB06710	-	-
P30542	DB03255	-	-
P30542	DB00178	-	-
P30542	DB01075	-	-
P30542	DB01074	-	-
P30542	DB01077	-	-
P30542	DB01076	-	-
P30542	DB00672	-	-
P30542	DB00674	-	-
P30542	DB00675	-	-
P30542	DB00679	-	-
P30542	DB01275	-	-
P30542	DB00824	-	-
P30542	DB00795	-	-
P30542	DB00794	-	-
P30542	DB00793	-	-
P30542	DB00823	-	-
P30542	DB00822	-	-
P30542	DB00415	-	-
P30542	DB00829	-	-
P30542	DB00411	-	-
P30542	DB00412	-	-
P30542	DB00640	-	-
P30542	DB00555	-	-
P30542	DB00554	-	-
P30542	DB00550	-	-
P30542	DB00553	-	-
P30542	DB00959	-	-
P30542	DB00489	-	-
P30542	DB00488	-	-
P30542	DB00483	-	-
P30542	DB00950	-	-
P30542	DB00481	-	-
P30542	DB00487	-	-
P30542	DB00484	-	-
P30542	DB01103	-	-
P30542	DB01105	-	-
P30542	DB01104	-	-
P30542	DB00214	-	-
P30542	DB00215	-	-
P30542	DB00359	-	-
P30542	DB00358	-	-
P30542	DB00357	-	-
P30542	DB00356	-	-
P30542	DB00353	-	-
P30542	DB00350	-	-
P30542	DB01208	-	-
P30542	DB01203	-	-
P30542	DB01200	-	-
P30542	DB01201	-	-
P30542	DB01611	-	-
P30542	DB01204	-	-
P30542	DB01205	-	-
P30542	DB01199	-	-
P30542	DB01193	-	-
P30542	DB01190	-	-
P30542	DB01191	-	-
P30542	DB01197	-	-
P30542	DB01299	-	-
P30542	DB00915	-	-
P30542	DB00384	-	-
P30542	DB00916	-	-
P30542	DB00911	-	-
P30542	DB00529	-	-
P30542	DB00524	-	-
P30542	DB00525	-	-
P30542	DB00919	-	-
P30542	DB00523	-	-
P30542	DB01035	-	-
P30542	DB01037	-	-
P30542	DB01408	-	-
P30542	DB01030	-	-
P30542	DB00131	-	-
P30542	DB01032	-	-
P30542	DB01406	-	-
P30542	DB01407	-	-
P30542	DB01400	-	-
P30542	DB00846	-	-
P30542	DB01039	-	-
P30542	DB00951	-	-
P30542	DB00421	-	-
P30542	DB00285	-	-
P30542	DB00284	-	-
P30542	DB00281	-	-
P30542	DB00283	-	-
P30542	DB00389	-	-
P30542	DB00328	-	-
P30542	DB00750	-	-
P30542	DB00756	-	-
P30542	DB00755	-	-
P30542	DB00322	-	-
P30542	DB00320	-	-
P30542	DB00758	-	-
P30542	DB00455	-	-
P30542	DB00324	-	-
P30542	DB00457	-	-
P30542	DB04571	-	-
P30542	DB00859	-	-
P30542	DB00857	-	-
P30542	DB00850	-	-
P30542	DB00851	-	-
P30542	DB00780	-	-
P30542	DB00428	-	-
P30542	DB00834	-	-
P30542	DB00783	-	-
P30542	DB00784	-	-
P30542	DB00939	-	-
P30542	DB00831	-	-
P30542	DB00393	-	-
P30542	DB00789	-	-
P30542	DB00935	-	-
P30542	DB00390	-	-
P30542	DB00424	-	-
P30542	DB00394	-	-
P30542	DB00547	-	-
P30542	DB00544	-	-
P30542	DB00542	-	-
P30542	DB00543	-	-
P30542	DB00540	-	-
P30542	DB01018	-	-
P30542	DB01016	-	-
P30542	DB01015	-	-
P30542	DB01014	-	-
P30542	DB01011	-	-
P30542	DB00549	-	-
P30542	DB00233	-	-
P30542	DB00495	-	-
P30542	DB00490	-	-
P30542	DB00493	-	-
P30542	DB08826	-	-
P30542	DB00498	-	-
P30542	DB00499	-	-
P30542	DB00321	-	-
P30542	DB00945	-	-
P30542	DB00734	-	-
P30542	DB00731	-	-
P30542	DB00309	-	-
P30542	DB00733	-	-
P30542	DB00305	-	-
P30542	DB00738	-	-
P30542	DB00302	-	-
P30542	DB01606	-	-
P30542	DB01167	-	-
P30542	DB01166	-	-
P30542	DB01165	-	-
P30542	DB01162	-	-
P30542	DB00426	-	-
P30542	DB01229	-	-
P30542	DB01287	-	-
P30542	DB01186	-	-
P30542	DB01068	-	-
P30542	DB01069	-	-
P30542	DB00649	-	-
P30542	DB00648	-	-
P30542	DB00163	-	-
P30542	DB01062	-	-
P30542	DB01060	-	-
P30542	DB01061	-	-
P30542	DB00641	-	-
P30542	DB01067	-	-
P30542	DB00643	-	-
P30542	DB01065	-	-
P30542	DB01357	-	-
P30542	DB00749	-	-
P30542	DB00298	-	-
P30542	DB00744	-	-
P30542	DB00297	-	-
P30542	DB00740	-	-
P30542	DB00741	-	-
P30542	DB00742	-	-
P30542	DB00291	-	-
P30542	DB00465	-	-
P30542	DB00450	-	-
P30542	DB00467	-	-
P30542	DB00461	-	-
P30542	DB00462	-	-
P30542	DB00469	-	-
P30542	DB00452	-	-
P30542	DB00194	-	-
P30542	DB00196	-	-
P30542	DB00190	-	-
P30542	DB00193	-	-
P30542	DB00199	-	-
P30542	DB00861	-	-
P30542	DB00860	-	-
P30542	DB00863	-	-
P30542	DB00325	-	-
P30542	DB00864	-	-
P30542	DB01113	-	-
P30542	DB01110	-	-
P30542	DB01114	-	-
P30542	DB01115	-	-
P30542	DB00177	-	-
P30542	DB01118	-	-
P30542	DB01119	-	-
P30542	DB00175	-	-
P30542	DB00263	-	-
P30542	DB00262	-	-
P30542	DB00266	-	-
P30542	DB00265	-	-
P30542	DB00264	-	-
P30542	DB00342	-	-
P30542	DB00343	-	-
P30542	DB00347	-	-
P30542	DB00635	-	-
P30542	DB00636	-	-
P30542	DB00637	-	-
P30542	DB00630	-	-
P30542	DB01233	-	-
P30542	DB01232	-	-
P30542	DB01231	-	-
P30542	DB01235	-	-
P30542	DB01234	-	-
P30542	DB00518	-	-
P30542	DB00904	-	-
P30542	DB01047	-	-
P30542	DB00903	-	-
P30542	DB00513	-	-
P30542	DB00512	-	-
P30542	DB00515	-	-
P30542	DB00514	-	-
P30542	DB01026	-	-
P30542	DB00688	-	-
P30542	DB00122	-	-
P30542	DB01023	-	-
P30542	DB00126	-	-
P30542	DB01021	-	-
P30542	DB00681	-	-
P30542	DB00682	-	-
P30542	DB01435	-	-
P30542	DB00684	-	-
P30542	DB01436	-	-
P30542	DB00999	-	-
P30542	DB00995	-	-
P30542	DB00994	-	-
P30542	DB00997	-	-
P30542	DB00996	-	-
P30542	DB00991	-	-
P30542	DB04552	-	-
P30542	DB04573	-	-
P30542	DB00836	-	-
P30542	DB01095	-	-
P30542	DB01092	-	-
P30542	DB01091	-	-
P30542	DB00656	-	-
P30542	DB00655	-	-
P30542	DB01099	-	-
P30542	DB00651	-	-
P30542	DB01253	-	-
P30542	DB00166	-	-
P30542	DB00788	-	-
P30542	DB00420	-	-
P30542	DB01380	-	-
P30542	DB00423	-	-
P30542	DB00928	-	-
P30542	DB00841	-	-
P30542	DB00934	-	-
P30542	DB00381	-	-
P30542	DB00382	-	-
P30542	DB00844	-	-
P30542	DB00920	-	-
P30542	DB00433	-	-
P30542	DB00848	-	-
P30542	DB00437	-	-
P30542	DB00434	-	-
P30542	DB00396	-	-
P30542	DB01008	-	-
P30542	DB01009	-	-
P30542	DB00531	-	-
P30542	DB00537	-	-
P30542	DB01001	-	-
P30542	DB01002	-	-
[truncated: 771 more rows]

## Sheet: Integumentary
Protein	Drug name	Plant source	Plant compound
P09917	-	TAXID:36610	Quercetin
P09917	-	TAXID:36610	Kaempferol
P09917	-	TAXID:74900	Quercetin
P09917	-	TAXID:74900	Protocatechuic Acid
P09917	-	TAXID:74900	Kaempferol
P09917	-	TAXID:74900	Caffeic Acid
P09917	-	TAXID:51240	Protocatechuic Acid
P09917	-	TAXID:51240	Caffeic Acid
P09917	-	TAXID:4081	Quercetin
P09917	-	TAXID:4222	Quercetin
P09917	-	TAXID:4577	Quercetin
P09917	-	TAXID:4577	Kaempferol
P09917	-	TAXID:4577	Caffeic Acid
P09917	-	TAXID:29760	Quercetin
P09917	-	TAXID:29760	Caffeic Acid
P09917	-	TAXID:4006	Pinoresinol
P09917	-	TAXID:3712	Quercetin
P09917	-	TAXID:3712	Kaempferol
P09917	-	TAXID:3712	Caffeic Acid
P09917	-	TAXID:114280	Quercetin
P09917	-	TAXID:114280	Protocatechuic Acid
P09917	-	TAXID:114280	Caffeic Acid
P09917	-	TAXID:4045	Quercetin
P09917	-	TAXID:4045	Kaempferol
P09917	-	TAXID:4045	Caffeic Acid
P09917	-	TAXID:4679	Quercetin
P09917	-	TAXID:4679	Protocatechuic Acid
P09917	-	TAXID:4679	Kaempferol
P09917	-	TAXID:4047	Quercetin
P09917	-	TAXID:4047	Kaempferol
P09917	-	TAXID:4120	Caffeic Acid
P09917	-	TAXID:4530	Quercetin
P09917	-	TAXID:4530	Guaiacol
P09917	-	TAXID:4530	Kaempferol
P09917	-	TAXID:171929	Guaiacol
P09917	-	TAXID:175228	Quercetin
P09917	-	TAXID:175228	Protocatechuic Acid
P09917	-	TAXID:3635	Guaiacol
P09917	-	TAXID:32224	Protocatechuic Acid
P09917	-	TAXID:4146	Quercetin
P09917	-	TAXID:4146	Kaempferol
P09917	-	TAXID:4146	Caffeic Acid
P09917	-	TAXID:65948	Caffeic Acid
P09917	-	TAXID:3469	Quercetin
P09917	-	TAXID:3469	Kaempferol
P09917	-	TAXID:3864	Caffeic Acid
P09917	-	TAXID:3864	Gentisic Acid
P09917	-	TAXID:3621	Protocatechuic Acid
P09917	-	TAXID:3621	Caffeic Acid
P09917	-	TAXID:29780	Quercetin
P09917	-	TAXID:29780	Protocatechuic Acid
P09917	-	TAXID:29780	Kaempferol
P09917	-	TAXID:29780	Caffeic Acid
P09917	-	TAXID:29780	Gentisic Acid
P09917	-	TAXID:3747	Guaiacol
P09917	-	TAXID:3747	Protocatechuic Acid
P09917	-	TAXID:3747	Kaempferol
P09917	-	TAXID:3747	Caffeic Acid
P09917	-	TAXID:3747	Quercetin
P09917	-	TAXID:3747	Gentisic Acid
P09917	-	TAXID:3617	Quercetin
P09917	-	TAXID:13731	Guaiacol
P09917	-	TAXID:3708	Quercetin
P09917	-	TAXID:3708	Thiouracil
P09917	-	TAXID:3708	Kaempferol
P09917	-	TAXID:3708	Caffeic Acid
P09917	-	TAXID:32247	Quercetin
P09917	-	TAXID:32247	Kaempferol
P09917	-	TAXID:4682	Quercetin
P09917	-	TAXID:4681	Quercetin
P09917	-	TAXID:4681	Protocatechuic Acid
P09917	-	TAXID:4681	Kaempferol
P09917	-	TAXID:4681	Caffeic Acid
P09917	-	TAXID:4513	Caffeic Acid
P09917	-	TAXID:49827	Nordihydroguaiaretic Acid
P09917	-	TAXID:49827	Caffeic Acid
P09917	-	TAXID:35925	Quercetin
P09917	-	TAXID:35925	Kaempferol
P09917	-	TAXID:35925	Caffeic Acid
P09917	-	TAXID:3888	Quercetin
P09917	-	TAXID:3888	Kaempferol
P09917	-	TAXID:4565	Quercetin
P09917	-	TAXID:4565	Guaiacol
P09917	-	TAXID:3983	Pinoresinol
P09917	-	TAXID:3983	Scopoletin
P09917	-	TAXID:3983	Protocatechuic Acid
P09917	-	TAXID:4236	Quercetin
P09917	-	TAXID:4236	Pyrocatechol
P09917	-	TAXID:151069	Protocatechuic Acid
P09917	-	TAXID:151069	Kaempferol
P09917	-	TAXID:151069	Gentisic Acid
P09917	-	TAXID:3885	Quercetin
P09917	-	TAXID:128608	Caffeic Acid
P09917	-	TAXID:4072	Quercetin
P09917	-	TAXID:4072	Honokiol
P09917	-	TAXID:4072	4-Methoxyhonokiol
P09917	-	TAXID:180772	Quercetin
P09917	-	TAXID:180772	Kaempferol
P09917	-	TAXID:13427	Quercetin
P09917	-	TAXID:13427	Scopoletin
P09917	-	TAXID:13427	Caffeic Acid
P09917	-	TAXID:94328	Honokiol
P09917	-	TAXID:4442	Quercetin
P09917	-	TAXID:4442	Guaiacol
P09917	-	TAXID:4442	Kaempferol
P09917	-	TAXID:4442	Caffeic Acid
P09917	-	TAXID:13216	Pyrocatechol
P09917	-	TAXID:4498	Scopoletin
P09917	-	TAXID:4498	Caffeic Acid
P09917	-	TAXID:48038	Quercetin
P09917	-	TAXID:48038	Kaempferol
P09917	-	TAXID:120290	Quercetin
P09917	-	TAXID:120290	Kaempferol
P09917	-	TAXID:120290	Caffeic Acid
P09917	-	TAXID:74645	Quercetin
P09917	-	TAXID:74645	Kaempferol
P09917	-	TAXID:22663	Quercetin
P09917	-	TAXID:3847	Quercetin
P09917	-	TAXID:3847	Kaempferol
P09917	-	TAXID:3711	Quercetin
P09917	-	TAXID:3711	Kaempferol
P09917	-	TAXID:3711	Caffeic Acid
P09917	-	TAXID:3659	Quercetin
P09917	-	TAXID:3659	Kaempferol
P09917	-	TAXID:50225	Quercetin
P09917	-	TAXID:4113	Protocatechuic Acid
P09917	-	TAXID:4113	Caffeic Acid
P09917	-	TAXID:4111	Guaiacol
P09917	-	TAXID:4111	Caffeic Acid
P09917	DB00179	-	-
P09917	DB00788	-	-
P09917	DB01009	-	-
P09917	DB00744	-	-
P09917	DB00341	-	-
P09917	DB00233	-	-
P09917	DB00920	-	-
P09917	DB00328	-	-
P09917	DB01050	-	-
P09917	DB00551	-	-
P09917	DB01243	-	-
P09917	DB00936	-	-
P09917	DB00482	-	-
P09917	DB00967	-	-
P09917	DB00455	-	-
P18405	-	TAXID:3708	Finasteride
P18405	DB01026	-	-
P18405	DB01128	-	-
P18405	DB00499	-	-
P18405	DB01126	-	-
P18405	DB01216	-	-
P31213	-	TAXID:3708	Finasteride
P31213	DB01026	-	-
P31213	DB01128	-	-
P31213	DB00499	-	-
P31213	DB01126	-	-
P31213	DB01216	-	-
P14679	-	TAXID:4681	Caffeic Acid
P14679	-	TAXID:4513	Caffeic Acid
P14679	-	TAXID:65948	Caffeic Acid
P14679	-	TAXID:49827	Caffeic Acid
P14679	-	TAXID:74900	Caffeic Acid
P14679	-	TAXID:3711	Caffeic Acid
P14679	-	TAXID:4442	Caffeic Acid
P14679	-	TAXID:4577	Caffeic Acid
P14679	-	TAXID:29760	Caffeic Acid
P14679	-	TAXID:35925	Caffeic Acid
P14679	-	TAXID:51240	Caffeic Acid
P14679	-	TAXID:128608	Caffeic Acid
P14679	-	TAXID:114280	Caffeic Acid
P14679	-	TAXID:4045	Caffeic Acid
P14679	-	TAXID:3712	Caffeic Acid
P14679	-	TAXID:13427	Caffeic Acid
P14679	-	TAXID:4120	Caffeic Acid
P14679	-	TAXID:4498	Caffeic Acid
P14679	-	TAXID:120290	Caffeic Acid
P14679	-	TAXID:4146	Caffeic Acid
P14679	-	TAXID:3621	Caffeic Acid
P14679	-	TAXID:29780	Caffeic Acid
P14679	-	TAXID:3747	Caffeic Acid
P14679	-	TAXID:4111	Caffeic Acid
P14679	-	TAXID:4113	Caffeic Acid
P14679	-	TAXID:3708	Caffeic Acid
P14679	-	TAXID:3864	Caffeic Acid
P14679	DB00120	-	-
P14679	DB00988	-	-
P14679	DB01235	-	-
P14679	DB00126	-	-
P35367	DB01064	-	-
P35367	DB01097	-	-
P35367	DB00153	-	-
P35367	DB00709	-	-
P35367	DB00258	-	-
P35367	DB00259	-	-
P35367	DB00252	-	-
P35367	DB00701	-	-
P35367	DB00251	-	-
P35367	DB00704	-	-
P35367	DB00257	-	-
P35367	DB00706	-	-
P35367	DB00255	-	-
P35367	DB00313	-	-
P35367	DB00310	-	-
P35367	DB00316	-	-
P35367	DB00315	-	-
P35367	DB00091	-	-
P35367	DB00319	-	-
P35367	DB00478	-	-
P35367	DB00570	-	-
P35367	DB00882	-	-
P35367	DB01156	-	-
P35367	DB01151	-	-
P35367	DB00650	-	-
P35367	DB00227	-	-
P35367	DB00224	-	-
P35367	DB00222	-	-
P35367	DB00220	-	-
P35367	DB00962	-	-
P35367	DB06710	-	-
P35367	DB03255	-	-
P35367	DB00178	-	-
P35367	DB01075	-	-
P35367	DB01074	-	-
P35367	DB01077	-	-
P35367	DB01076	-	-
P35367	DB00672	-	-
P35367	DB00674	-	-
P35367	DB00675	-	-
P35367	DB00679	-	-
P35367	DB01275	-	-
P35367	DB00254	-	-
P35367	DB00795	-	-
P35367	DB00794	-	-
P35367	DB00793	-	-
P35367	DB00792	-	-
P35367	DB00823	-	-
P35367	DB00822	-	-
P35367	DB00415	-	-
P35367	DB00829	-	-
P35367	DB00411	-	-
P35367	DB00412	-	-
P35367	DB00798	-	-
P35367	DB00555	-	-
P35367	DB00554	-	-
P35367	DB00550	-	-
P35367	DB00553	-	-
P35367	DB00959	-	-
P35367	DB00489	-	-
P35367	DB00488	-	-
P35367	DB00898	-	-
P35367	DB00950	-	-
P35367	DB00481	-	-
P35367	DB00487	-	-
P35367	DB00484	-	-
P35367	DB01103	-	-
P35367	DB01105	-	-
P35367	DB01104	-	-
P35367	DB00214	-	-
P35367	DB00215	-	-
P35367	DB00359	-	-
P35367	DB00357	-	-
P35367	DB00356	-	-
P35367	DB00353	-	-
P35367	DB00350	-	-
P35367	DB01208	-	-
P35367	DB01203	-	-
P35367	DB01200	-	-
P35367	DB01201	-	-
P35367	DB01611	-	-
P35367	DB01204	-	-
P35367	DB01205	-	-
P35367	DB01199	-	-
P35367	DB01193	-	-
P35367	DB01190	-	-
P35367	DB01191	-	-
P35367	DB01197	-	-
P35367	DB01299	-	-
P35367	DB00915	-	-
P35367	DB00384	-	-
P35367	DB00916	-	-
P35367	DB00911	-	-
P35367	DB00529	-	-
P35367	DB00524	-	-
P35367	DB00525	-	-
P35367	DB00919	-	-
P35367	DB00523	-	-
P35367	DB01035	-	-
P35367	DB01037	-	-
P35367	DB00387	-	-
P35367	DB01408	-	-
P35367	DB01030	-	-
P35367	DB01032	-	-
P35367	DB01406	-	-
P35367	DB01407	-	-
P35367	DB01400	-	-
P35367	DB00846	-	-
P35367	DB01039	-	-
P35367	DB00951	-	-
P35367	DB00421	-	-
P35367	DB00285	-	-
P35367	DB00284	-	-
P35367	DB00281	-	-
P35367	DB00283	-	-
P35367	DB00389	-	-
P35367	DB00328	-	-
P35367	DB00750	-	-
P35367	DB00756	-	-
P35367	DB00755	-	-
P35367	DB00322	-	-
P35367	DB00320	-	-
P35367	DB00758	-	-
P35367	DB00455	-	-
P35367	DB00324	-	-
P35367	DB00457	-	-
P35367	DB04571	-	-
P35367	DB00859	-	-
P35367	DB00857	-	-
P35367	DB00850	-	-
P35367	DB00851	-	-
P35367	DB00780	-	-
P35367	DB00428	-	-
P35367	DB00834	-	-
P35367	DB00783	-	-
P35367	DB00784	-	-
P35367	DB00939	-	-
P35367	DB00831	-	-
P35367	DB00393	-	-
P35367	DB00789	-	-
P35367	DB00935	-	-
P35367	DB00934	-	-
P35367	DB00424	-	-
P35367	DB00427	-	-
P35367	DB00394	-	-
P35367	DB00547	-	-
P35367	DB00544	-	-
P35367	DB00542	-	-
P35367	DB00543	-	-
P35367	DB00540	-	-
P35367	DB01018	-	-
P35367	DB01016	-	-
P35367	DB01015	-	-
P35367	DB01014	-	-
P35367	DB01011	-	-
P35367	DB00549	-	-
P35367	DB00233	-	-
P35367	DB00495	-	-
P35367	DB00490	-	-
P35367	DB00493	-	-
P35367	DB08826	-	-
P35367	DB00498	-	-
P35367	DB00499	-	-
P35367	DB00321	-	-
P35367	DB00945	-	-
P35367	DB00734	-	-
P35367	DB00731	-	-
P35367	DB00309	-	-
P35367	DB00733	-	-
P35367	DB00305	-	-
P35367	DB00738	-	-
P35367	DB00302	-	-
P35367	DB01606	-	-
P35367	DB01167	-	-
P35367	DB01166	-	-
P35367	DB01165	-	-
P35367	DB01162	-	-
P35367	DB00426	-	-
P35367	DB01168	-	-
P35367	DB01287	-	-
P35367	DB06697	-	-
P35367	DB01068	-	-
P35367	DB01069	-	-
P35367	DB00649	-	-
P35367	DB00648	-	-
P35367	DB00163	-	-
P35367	DB01062	-	-
P35367	DB01060	-	-
P35367	DB01061	-	-
P35367	DB00641	-	-
P35367	DB01067	-	-
P35367	DB00643	-	-
P35367	DB01065	-	-
P35367	DB01357	-	-
P35367	DB00749	-	-
P35367	DB00298	-	-
P35367	DB00744	-	-
P35367	DB00297	-	-
P35367	DB00740	-	-
P35367	DB00741	-	-
P35367	DB00742	-	-
P35367	DB00291	-	-
P35367	DB00465	-	-
P35367	DB00450	-	-
P35367	DB00467	-	-
P35367	DB00461	-	-
P35367	DB00462	-	-
P35367	DB00469	-	-
P35367	DB00452	-	-
P35367	DB00196	-	-
P35367	DB00190	-	-
P35367	DB00193	-	-
P35367	DB00199	-	-
P35367	DB00861	-	-
P35367	DB00860	-	-
P35367	DB00863	-	-
P35367	DB00325	-	-
P35367	DB00864	-	-
P35367	DB01113	-	-
P35367	DB01110	-	-
P35367	DB01114	-	-
P35367	DB01115	-	-
P35367	DB00177	-	-
P35367	DB01118	-	-
P35367	DB01119	-	-
P35367	DB00175	-	-
P35367	DB00263	-	-
P35367	DB00262	-	-
P35367	DB00266	-	-
P35367	DB00265	-	-
P35367	DB00264	-	-
P35367	DB00341	-	-
P35367	DB00342	-	-
P35367	DB00343	-	-
P35367	DB00347	-	-
P35367	DB00635	-	-
P35367	DB00636	-	-
P35367	DB00637	-	-
P35367	DB00630	-	-
P35367	DB01233	-	-
P35367	DB01232	-	-
P35367	DB01231	-	-
P35367	DB01235	-	-
P35367	DB01234	-	-
P35367	DB01239	-	-
P35367	DB00104	-	-
P35367	DB00518	-	-
P35367	DB00904	-	-
P35367	DB01047	-	-
P35367	DB00903	-	-
P35367	DB00513	-	-
P35367	DB00512	-	-
P35367	DB00515	-	-
P35367	DB00514	-	-
P35367	DB01026	-	-
P35367	DB00688	-	-
P35367	DB00122	-	-
P35367	DB01023	-	-
P35367	DB00126	-	-
P35367	DB01021	-	-
P35367	DB00681	-	-
P35367	DB00682	-	-
P35367	DB01435	-	-
P35367	DB00684	-	-
P35367	DB01436	-	-
P35367	DB00999	-	-
P35367	DB00995	-	-
P35367	DB00994	-	-
P35367	DB00997	-	-
P35367	DB00996	-	-
P35367	DB00991	-	-
P35367	DB04552	-	-
P35367	DB04573	-	-
P35367	DB00836	-	-
P35367	DB01095	-	-
P35367	DB01092	-	-
P35367	DB01091	-	-
P35367	DB00656	-	-
P35367	DB00655	-	-
P35367	DB01099	-	-
P35367	DB00651	-	-
P35367	DB01253	-	-
P35367	DB00166	-	-
P35367	DB00788	-	-
P35367	DB00420	-	-
P35367	DB01380	-	-
P35367	DB00423	-	-
P35367	DB00928	-	-
P35367	DB00841	-	-
P35367	DB00390	-	-
P35367	DB00381	-	-
P35367	DB00382	-	-
P35367	DB00844	-	-
P35367	DB00920	-	-
P35367	DB00433	-	-
P35367	DB00848	-	-
P35367	DB00437	-	-
P35367	DB00434	-	-
P35367	DB00396	-	-
P35367	DB01008	-	-
P35367	DB01009	-	-
P35367	DB00531	-	-
P35367	DB00537	-	-
P35367	DB01001	-	-
P35367	DB01002	-	-
P35367	DB01003	-	-
P35367	DB01005	-	-
P35367	DB01006	-	-
P35367	DB00541	-	-
P35367	DB00279	-	-
P35367	DB00274	-	-
P35367	DB00418	-	-
P35367	DB00277	-	-
P35367	DB00271	-	-
P35367	DB00376	-	-
P35367	DB00370	-	-
P35367	DB00373	-	-
P35367	DB00379	-	-
P35367	DB06150	-	-
P35367	DB01171	-	-
P35367	DB01172	-	-
P35367	DB01173	-	-
P35367	DB01174	-	-
P35367	DB01175	-	-
P35367	DB01176	-	-
P35367	DB01177	-	-
P35367	DB01179	-	-
P35367	DB00972	-	-
P35367	DB00970	-	-
P35367	DB00977	-	-
P35367	DB00975	-	-
P35367	DB00502	-	-
P35367	DB00503	-	-
P35367	DB00500	-	-
P35367	DB00978	-	-
P35367	DB01581	-	-
P35367	DB01582	-	-
P35367	DB01053	-	-
P35367	DB00698	-	-
P35367	DB01050	-	-
P35367	DB01056	-	-
P35367	DB01055	-	-
P35367	DB01054	-	-
P35367	DB00692	-	-
P35367	DB01351	-	-
P35367	DB01059	-	-
P35367	DB01058	-	-
P35367	DB00696	-	-
P35367	DB01427	-	-
P35367	DB00694	-	-
P35367	DB00695	-	-
P35367	DB00987	-	-
P35367	DB00982	-	-
P35367	DB00981	-	-
P35367	DB00591	-	-
P35367	DB00590	-	-
P35367	DB00593	-	-
P35367	DB00595	-	-
P35367	DB00598	-	-
P35367	DB00778	-	-
P35367	DB00809	-	-
P35367	DB00808	-	-
P35367	DB00807	-	-
P35367	DB00806	-	-
P35367	DB00773	-	-
P35367	DB00804	-	-
P35367	DB00776	-	-
P35367	DB00477	-	-
P35367	DB00472	-	-
P35367	DB00471	-	-
P35367	DB00577	-	-
P35367	DB00576	-	-
P35367	DB00575	-	-
P35367	DB00573	-	-
P35367	DB00572	-	-
P35367	DB00571	-	-
P35367	DB00479	-	-
P35367	DB00186	-	-
P35367	DB00187	-	-
P35367	DB00184	-	-
P35367	DB00180	-	-
P35367	DB00181	-	-
P35367	DB00871	-	-
P35367	DB00877	-	-
P35367	DB00874	-	-
P35367	DB01128	-	-
P35367	DB01121	-	-
P35367	DB01120	-	-
P35367	DB01127	-	-
P35367	DB01125	-	-
P35367	DB00330	-	-
P35367	DB00238	-	-
P35367	DB00239	-	-
P35367	DB00443	-	-
P35367	DB01087	-	-
P35367	DB00235	-	-
P35367	DB00600	-	-
P35367	DB00602	-	-
P35367	DB00604	-	-
P35367	DB01224	-	-
P35367	DB01221	-	-
P35367	DB01222	-	-
P35367	DB01223	-	-
P35367	DB00483	-	-
P35367	DB00482	-	-
P35367	DB00936	-	-
P35367	DB01339	-	-
P35367	DB00730	-	-
P35367	DB00391	-	-
P35367	DB01148	-	-
P35367	DB01147	-	-
P35367	DB01143	-	-
P35367	DB01142	-	-
P35367	DB01082	-	-
P35367	DB00839	-	-
P35367	DB01086	-	-
P35367	DB00145	-	-
P35367	DB00623	-	-
P35367	DB00620	-	-
P35367	DB00627	-	-
P35367	DB00624	-	-
P35367	DB01242	-	-
P35367	DB01241	-	-
P35367	DB01248	-	-
P35367	DB01394	-	-
P35367	DB01396	-	-
P35367	DB06148	-	-
P35367	DB00169	-	-
P35367	DB01392	-	-
P35367	DB01393	-	-
P35367	DB06144	-	-
P35367	DB06147	-	-
P35367	DB01399	-	-
P35367	DB00818	-	-
P35367	DB00819	-	-
P35367	DB00762	-	-
P35367	DB00763	-	-
P35367	DB00812	-	-
P35367	DB00813	-	-
P35367	DB00814	-	-
P35367	DB00765	-	-
P35367	DB00568	-	-
P35367	DB00401	-	-
P35367	DB00400	-	-
P35367	DB00406	-	-
P35367	DB00404	-	-
P35367	DB00561	-	-
P35367	DB00563	-	-
P35367	DB00564	-	-
P35367	DB04841	-	-
P35367	DB00567	-	-
P35367	DB00759	-	-
P35367	DB01426	-	-
P35367	DB00884	-	-
P35367	DB00968	-	-
P35367	DB00969	-	-
P35367	DB00881	-	-
P35367	DB00967	-	-
P35367	DB00960	-	-
P35367	DB00961	-	-
P35367	DB00889	-	-
P35367	DB00963	-	-
P35367	DB06729	-	-
P35367	DB00249	-	-
P35367	DB00717	-	-
P35367	DB00715	-	-
P35367	DB00242	-	-
P35367	DB00245	-	-
P35367	DB00712	-	-
P35367	DB00247	-	-
P35367	DB00246	-	-
P35367	DB00367	-	-
P35367	DB00365	-	-
P35367	DB00363	-	-
P35367	DB00361	-	-
P35367	DB01024	-	-
P35367	DB03166	-	-
P35367	DB00614	-	-
P35367	DB00615	-	-
P35367	DB01211	-	-
P35367	DB01210	-	-
P35367	DB01213	-	-
P35367	DB00619	-	-
P35367	DB01217	-	-
P35367	DB01216	-	-
P35367	DB06698	-	-
P35367	DB01188	-	-
P35367	DB01627	-	-
P35367	DB01181	-	-
P35367	DB06691	-	-
P35367	DB01183	-	-
P35367	DB01182	-	-
P35367	DB01184	-	-
P35367	DB01186	-	-
P35367	DB00685	-	-
P35367	DB00810	-	-
P35367	DB00811	-	-
P35367	DB01029	-	-
P35367	DB00760	-	-
P35367	DB08807	-	-
P35367	DB04838	-	-
P35367	DB08801	-	-
P35367	DB01599	-	-
P35367	DB01044	-	-
P35367	DB01045	-	-
P35367	DB01229	-	-
P35367	DB01595	-	-
P35367	DB01041	-	-
P35367	DB01042	-	-
P35367	DB00661	-	-
P35367	DB00669	-	-
P35367	DB00668	-	-
P35367	DB00583	-	-
P35367	DB00586	-	-
P35367	DB00584	-	-
P35367	DB00585	-	-
P35367	DB08797	-	-
P35367	DB00589	-	-
P35367	DB00339	-	-
P35367	DB00724	-	-
P35367	DB00725	-	-
P35367	DB00722	-	-
P35367	DB00721	-	-
P35367	DB00331	-	-
P35367	DB00446	-	-
P35367	DB00445	-	-
P35367	DB00335	-	-
P35367	DB00334	-	-
P35367	DB00441	-	-
P35367	DB01136	-	-
P35367	DB01137	-	-
P35367	DB01132	-	-
P35367	DB01206	-	-
P35367	DB00207	-	-
P35367	DB00206	-	-
P35367	DB00201	-	-
P35367	DB00202	-	-
P35367	DB00208	-	-
P35367	DB06770	-	-
Q15759	-	TAXID:3435	Staurosporine
Q15759	DB00398	-	-
Q15759	DB00317	-	-
Q15759	DB06616	-	-
Q15759	DB01254	-	-
Q15759	DB00619	-	-
Q15759	DB06589	-	-
Q15759	DB01268	-	-
Q15759	DB05294	-	-
Q15759	DB00530	-	-
Q15759	DB08877	-	-
Q15759	DB04868	-	-
Q15759	DB01259	-	-
Q15759	DB00877	-	-
P37231	-	TAXID:65948	Apigenin
P37231	-	TAXID:74900	Kaempferol
P37231	-	TAXID:51240	Palmitoleic Acid
P37231	-	TAXID:4081	Naringenin
P37231	-	TAXID:4222	Acacetin
P37231	-	TAXID:4222	Alpha-Linolenic Acid
P37231	-	TAXID:4577	Chrysoeriol
P37231	-	TAXID:4577	Naringenin
P37231	-	TAXID:4577	Kaempferol
P37231	-	TAXID:36610	Apigenin
P37231	-	TAXID:36610	Kaempferol
P37231	-	TAXID:36610	Chrysoeriol
P37231	-	TAXID:4006	Alpha-Linolenic Acid
P37231	-	TAXID:175228	Syringetin
P37231	-	TAXID:4045	Apigenin
P37231	-	TAXID:4045	Kaempferol
P37231	-	TAXID:4045	Chrysoeriol
P37231	-	TAXID:4679	Kaempferol
P37231	-	TAXID:4047	Kaempferol
P37231	-	TAXID:78168	Apigenin
P37231	-	TAXID:4530	Linoleic
P37231	-	TAXID:4530	Kaempferol
P37231	-	TAXID:4681	Kaempferol
P37231	-	TAXID:48038	Kaempferol
P37231	-	TAXID:89151	Apigenin
P37231	-	TAXID:3760	Hesperetin
P37231	-	TAXID:4146	Apigenin
P37231	-	TAXID:4146	Diosmetin
P37231	-	TAXID:4146	Kaempferol
P37231	-	TAXID:4146	Chrysoeriol
P37231	-	TAXID:3469	Kaempferol
P37231	-	TAXID:29780	Kaempferol
P37231	-	TAXID:3747	Naringenin
P37231	-	TAXID:3747	Kaempferol
P37231	-	TAXID:3708	Naringenin
P37231	-	TAXID:3708	Kaempferol
P37231	-	TAXID:32247	Kaempferol
P37231	-	TAXID:171929	Linoleic
P37231	-	TAXID:49827	Formononetin
P37231	-	TAXID:49827	Naringenin
P37231	-	TAXID:35925	Kaempferol
P37231	-	TAXID:3888	Formononetin
P37231	-	TAXID:3888	Naringenin
P37231	-	TAXID:3888	Pseudobaptigenin
P37231	-	TAXID:3888	Kaempferol
P37231	-	TAXID:3888	Daidzein
P37231	-	TAXID:4565	Formononetin
P37231	-	TAXID:94328	Apigenin
P37231	-	TAXID:4236	Gemfibrozil
P37231	-	TAXID:4236	Alpha-Linolenic Acid
P37231	-	TAXID:151069	Kaempferol
P37231	-	TAXID:3649	Daidzein
P37231	-	TAXID:3712	Kaempferol
P37231	-	TAXID:180772	Kaempferol
P37231	-	TAXID:4072	Apigenin
P37231	-	TAXID:4072	Chrysoeriol
P37231	-	TAXID:4442	Genistein
P37231	-	TAXID:4442	Hesperetin
P37231	-	TAXID:4442	Kaempferol
P37231	-	TAXID:4442	Apigenin
P37231	-	TAXID:4442	Daidzein
P37231	-	TAXID:4442	Naringenin
P37231	-	TAXID:120290	Naringenin
P37231	-	TAXID:120290	Kaempferol
P37231	-	TAXID:74645	Kaempferol
P37231	-	TAXID:3847	Genistein
P37231	-	TAXID:3847	Linoleic
P37231	-	TAXID:3847	Kaempferol
P37231	-	TAXID:3847	Apigenin
P37231	-	TAXID:3847	Daidzein
P37231	-	TAXID:3847	Naringenin
P37231	-	TAXID:3847	74-Dihydroxyflavone
P37231	-	TAXID:3711	Alpha-Linolenic Acid
P37231	-	TAXID:3711	Linoleic
P37231	-	TAXID:3711	Kaempferol
P37231	-	TAXID:3659	Kaempferol
P37231	-	TAXID:50225	Chrysoeriol
P37231	DB00834	-	-
P37231	DB01094	-	-
P37231	DB00784	-	-
P37231	DB01092	-	-
P37231	DB00421	-	-
P37231	DB00390	-	-
P37231	DB00396	-	-
P37231	DB00258	-	-
P37231	DB00783	-	-
P37231	DB00255	-	-
P37231	DB00313	-	-
P37231	DB00091	-	-
P37231	DB00159	-	-
P37231	DB00945	-	-
P37231	DB00384	-	-
P37231	DB00140	-	-
P37231	DB00382	-	-
P37231	DB00925	-	-
P37231	DB00624	-	-
P37231	DB01241	-	-
P37231	DB00307	-	-
P37231	DB00738	-	-
P37231	DB00227	-	-
P37231	DB00220	-	-
P37231	DB01394	-	-
P37231	DB01396	-	-
P37231	DB01393	-	-
P37231	DB06710	-	-
P37231	DB03255	-	-
P37231	DB00970	-	-
P37231	DB00811	-	-
P37231	DB00795	-	-
P37231	DB00400	-	-
P37231	DB00675	-	-
P37231	DB00563	-	-
P37231	DB01229	-	-
P37231	DB00375	-	-
P37231	DB00882	-	-
P37231	DB00966	-	-
P37231	DB00166	-	-
P37231	DB01069	-	-
P37231	DB00648	-	-
P37231	DB00162	-	-
P37231	DB00415	-	-
P37231	DB00168	-	-
P37231	DB00169	-	-
P37231	DB00412	-	-
P37231	DB00554	-	-
P37231	DB00550	-	-
P37231	DB01024	-	-
P37231	DB00482	-	-
P37231	DB00481	-	-
P37231	DB03166	-	-
P37231	DB01100	-	-
P37231	DB00509	-	-
P37231	DB06689	-	-
P37231	DB00615	-	-
P37231	DB00507	-	-
P37231	DB00698	-	-
P37231	DB01050	-	-
P37231	DB01346	-	-
P37231	DB06691	-	-
P37231	DB01420	-	-
P37231	DB00468	-	-
P37231	DB00694	-	-
P37231	DB00682	-	-
P37231	DB00982	-	-
P37231	DB00595	-	-
P37231	DB01115	-	-
P37231	DB01045	-	-
P37231	DB00772	-	-
P37231	DB01042	-	-
P37231	DB00815	-	-
P37231	DB00661	-	-
P37231	DB00571	-	-
P37231	DB00262	-	-
P37231	DB00586	-	-
P37231	DB00406	-	-
P37231	DB00928	-	-
P37231	DB00636	-	-
P37231	DB01127	-	-
P37231	DB00523	-	-
P37231	DB01232	-	-
P37231	DB00132	-	-
P37231	DB00445	-	-
P37231	DB01039	-	-
P37231	DB00238	-	-
P37231	DB00235	-	-
P37231	DB00903	-	-
P37231	DB01132	-	-
P37231	DB00908	-	-
P37231	DB01026	-	-
P37231	DB01438	-	-
P37231	DB00328	-	-
P37231	DB00756	-	-
P37231	DB00755	-	-
P37231	DB00451	-	-
P37231	DB00321	-	-
P37231	DB00205	-	-
P37231	DB00206	-	-
P37231	DB00997	-	-

## Sheet: Monogenic
Protein	Drug name	Plant source	Plant compound
P09917	-	TAXID:36610	Quercetin
P09917	-	TAXID:36610	Kaempferol
P09917	-	TAXID:74900	Quercetin
P09917	-	TAXID:74900	Protocatechuic Acid
P09917	-	TAXID:74900	Kaempferol
P09917	-	TAXID:74900	Caffeic Acid
P09917	-	TAXID:51240	Protocatechuic Acid
P09917	-	TAXID:51240	Caffeic Acid
P09917	-	TAXID:4081	Quercetin
P09917	-	TAXID:4222	Quercetin
P09917	-	TAXID:4577	Quercetin
P09917	-	TAXID:4577	Kaempferol
P09917	-	TAXID:4577	Caffeic Acid
P09917	-	TAXID:29760	Quercetin
P09917	-	TAXID:29760	Caffeic Acid
P09917	-	TAXID:4006	Pinoresinol
P09917	-	TAXID:3712	Quercetin
P09917	-	TAXID:3712	Kaempferol
P09917	-	TAXID:3712	Caffeic Acid
P09917	-	TAXID:114280	Quercetin
P09917	-	TAXID:114280	Protocatechuic Acid
P09917	-	TAXID:114280	Caffeic Acid
P09917	-	TAXID:4045	Quercetin
P09917	-	TAXID:4045	Kaempferol
P09917	-	TAXID:4045	Caffeic Acid
P09917	-	TAXID:4679	Quercetin
P09917	-	TAXID:4679	Protocatechuic Acid
P09917	-	TAXID:4679	Kaempferol
P09917	-	TAXID:4047	Quercetin
P09917	-	TAXID:4047	Kaempferol
P09917	-	TAXID:4120	Caffeic Acid
P09917	-	TAXID:4530	Quercetin
P09917	-	TAXID:4530	Guaiacol
P09917	-	TAXID:4530	Kaempferol
P09917	-	TAXID:171929	Guaiacol
P09917	-	TAXID:175228	Quercetin
P09917	-	TAXID:175228	Protocatechuic Acid
P09917	-	TAXID:3635	Guaiacol
P09917	-	TAXID:32224	Protocatechuic Acid
P09917	-	TAXID:4146	Quercetin
P09917	-	TAXID:4146	Kaempferol
P09917	-	TAXID:4146	Caffeic Acid
P09917	-	TAXID:65948	Caffeic Acid
P09917	-	TAXID:3469	Quercetin
P09917	-	TAXID:3469	Kaempferol
P09917	-	TAXID:3864	Caffeic Acid
P09917	-	TAXID:3864	Gentisic Acid
P09917	-	TAXID:3621	Protocatechuic Acid
P09917	-	TAXID:3621	Caffeic Acid
P09917	-	TAXID:29780	Quercetin
P09917	-	TAXID:29780	Protocatechuic Acid
P09917	-	TAXID:29780	Kaempferol
P09917	-	TAXID:29780	Caffeic Acid
P09917	-	TAXID:29780	Gentisic Acid
P09917	-	TAXID:3747	Guaiacol
P09917	-	TAXID:3747	Protocatechuic Acid
P09917	-	TAXID:3747	Kaempferol
P09917	-	TAXID:3747	Caffeic Acid
P09917	-	TAXID:3747	Quercetin
P09917	-	TAXID:3747	Gentisic Acid
P09917	-	TAXID:3617	Quercetin
P09917	-	TAXID:13731	Guaiacol
P09917	-	TAXID:3708	Quercetin
P09917	-	TAXID:3708	Thiouracil
P09917	-	TAXID:3708	Kaempferol
P09917	-	TAXID:3708	Caffeic Acid
P09917	-	TAXID:32247	Quercetin
P09917	-	TAXID:32247	Kaempferol
P09917	-	TAXID:4682	Quercetin
P09917	-	TAXID:4681	Quercetin
P09917	-	TAXID:4681	Protocatechuic Acid
P09917	-	TAXID:4681	Kaempferol
P09917	-	TAXID:4681	Caffeic Acid
P09917	-	TAXID:4513	Caffeic Acid
P09917	-	TAXID:49827	Nordihydroguaiaretic Acid
P09917	-	TAXID:49827	Caffeic Acid
P09917	-	TAXID:35925	Quercetin
P09917	-	TAXID:35925	Kaempferol
P09917	-	TAXID:35925	Caffeic Acid
P09917	-	TAXID:3888	Quercetin
P09917	-	TAXID:3888	Kaempferol
P09917	-	TAXID:4565	Quercetin
P09917	-	TAXID:4565	Guaiacol
P09917	-	TAXID:3983	Pinoresinol
P09917	-	TAXID:3983	Scopoletin
P09917	-	TAXID:3983	Protocatechuic Acid
P09917	-	TAXID:4236	Quercetin
P09917	-	TAXID:4236	Pyrocatechol
P09917	-	TAXID:151069	Protocatechuic Acid
P09917	-	TAXID:151069	Kaempferol
P09917	-	TAXID:151069	Gentisic Acid
P09917	-	TAXID:3885	Quercetin
P09917	-	TAXID:128608	Caffeic Acid
P09917	-	TAXID:4072	Quercetin
P09917	-	TAXID:4072	Honokiol
P09917	-	TAXID:4072	4-Methoxyhonokiol
P09917	-	TAXID:180772	Quercetin
P09917	-	TAXID:180772	Kaempferol
P09917	-	TAXID:13427	Quercetin
P09917	-	TAXID:13427	Scopoletin
P09917	-	TAXID:13427	Caffeic Acid
P09917	-	TAXID:94328	Honokiol
P09917	-	TAXID:4442	Quercetin
P09917	-	TAXID:4442	Guaiacol
P09917	-	TAXID:4442	Kaempferol
P09917	-	TAXID:4442	Caffeic Acid
P09917	-	TAXID:13216	Pyrocatechol
P09917	-	TAXID:4498	Scopoletin
P09917	-	TAXID:4498	Caffeic Acid
P09917	-	TAXID:48038	Quercetin
P09917	-	TAXID:48038	Kaempferol
P09917	-	TAXID:120290	Quercetin
P09917	-	TAXID:120290	Kaempferol
P09917	-	TAXID:120290	Caffeic Acid
P09917	-	TAXID:74645	Quercetin
P09917	-	TAXID:74645	Kaempferol
P09917	-	TAXID:22663	Quercetin
P09917	-	TAXID:3847	Quercetin
P09917	-	TAXID:3847	Kaempferol
P09917	-	TAXID:3711	Quercetin
P09917	-	TAXID:3711	Kaempferol
P09917	-	TAXID:3711	Caffeic Acid
P09917	-	TAXID:3659	Quercetin
P09917	-	TAXID:3659	Kaempferol
P09917	-	TAXID:50225	Quercetin
P09917	-	TAXID:4113	Protocatechuic Acid
P09917	-	TAXID:4113	Caffeic Acid
P09917	-	TAXID:4111	Guaiacol
P09917	-	TAXID:4111	Caffeic Acid
P09917	DB00179	-	-
P09917	DB00788	-	-
P09917	DB01009	-	-
P09917	DB00744	-	-
P09917	DB00341	-	-
P09917	DB00233	-	-
P09917	DB00920	-	-
P09917	DB00328	-	-
P09917	DB01050	-	-
P09917	DB00551	-	-
P09917	DB01243	-	-
P09917	DB00936	-	-
P09917	DB00482	-	-
P09917	DB00967	-	-
P09917	DB00455	-	-
P08246	DB01064	-	-
P08246	DB01097	-	-
P08246	DB00153	-	-
P08246	DB00709	-	-
P08246	DB00258	-	-
P08246	DB00259	-	-
P08246	DB00252	-	-
P08246	DB00701	-	-
P08246	DB00251	-	-
P08246	DB00704	-	-
P08246	DB00257	-	-
P08246	DB00254	-	-
P08246	DB00255	-	-
P08246	DB00313	-	-
P08246	DB00310	-	-
P08246	DB00316	-	-
P08246	DB00091	-	-
P08246	DB00319	-	-
P08246	DB00478	-	-
P08246	DB00570	-	-
P08246	DB00882	-	-
P08246	DB01156	-	-
P08246	DB01151	-	-
P08246	DB00650	-	-
P08246	DB00227	-	-
P08246	DB00224	-	-
P08246	DB00222	-	-
P08246	DB00220	-	-
P08246	DB00962	-	-
P08246	DB06710	-	-
P08246	DB03255	-	-
P08246	DB00178	-	-
P08246	DB01075	-	-
P08246	DB01074	-	-
P08246	DB01077	-	-
P08246	DB01076	-	-
P08246	DB00672	-	-
P08246	DB00674	-	-
P08246	DB00675	-	-
P08246	DB00679	-	-
P08246	DB01275	-	-
P08246	DB00795	-	-
P08246	DB00794	-	-
P08246	DB00793	-	-
P08246	DB00823	-	-
P08246	DB00822	-	-
P08246	DB00415	-	-
P08246	DB00829	-	-
P08246	DB00411	-	-
P08246	DB00412	-	-
P08246	DB00798	-	-
P08246	DB00555	-	-
P08246	DB00554	-	-
P08246	DB00550	-	-
P08246	DB00553	-	-
P08246	DB00959	-	-
P08246	DB00489	-	-
P08246	DB00488	-	-
P08246	DB00483	-	-
P08246	DB00950	-	-
P08246	DB00481	-	-
P08246	DB00487	-	-
P08246	DB00484	-	-
P08246	DB01103	-	-
P08246	DB01105	-	-
P08246	DB01104	-	-
P08246	DB00214	-	-
P08246	DB00215	-	-
P08246	DB00359	-	-
P08246	DB00357	-	-
P08246	DB00356	-	-
P08246	DB00353	-	-
P08246	DB00350	-	-
P08246	DB01208	-	-
P08246	DB01203	-	-
P08246	DB01200	-	-
P08246	DB01201	-	-
P08246	DB01611	-	-
P08246	DB01204	-	-
P08246	DB01205	-	-
P08246	DB01199	-	-
P08246	DB01193	-	-
P08246	DB01190	-	-
P08246	DB01191	-	-
P08246	DB01197	-	-
P08246	DB01299	-	-
P08246	DB05521	-	-
P08246	DB00915	-	-
P08246	DB00384	-	-
P08246	DB00916	-	-
P08246	DB00911	-	-
P08246	DB00529	-	-
P08246	DB00524	-	-
P08246	DB00525	-	-
P08246	DB00919	-	-
P08246	DB00523	-	-
P08246	DB01035	-	-
P08246	DB01037	-	-
P08246	DB01408	-	-
P08246	DB01030	-	-
P08246	DB01032	-	-
P08246	DB01406	-	-
P08246	DB01407	-	-
P08246	DB01400	-	-
P08246	DB00846	-	-
P08246	DB01039	-	-
P08246	DB00951	-	-
P08246	DB00421	-	-
P08246	DB00285	-	-
P08246	DB00284	-	-
P08246	DB00281	-	-
P08246	DB00283	-	-
P08246	DB00389	-	-
P08246	DB00328	-	-
P08246	DB00750	-	-
P08246	DB00756	-	-
P08246	DB00755	-	-
P08246	DB00322	-	-
P08246	DB00320	-	-
P08246	DB00758	-	-
P08246	DB00455	-	-
P08246	DB00324	-	-
P08246	DB00457	-	-
P08246	DB04571	-	-
P08246	DB00859	-	-
P08246	DB00857	-	-
P08246	DB00850	-	-
P08246	DB00851	-	-
P08246	DB00780	-	-
P08246	DB00428	-	-
P08246	DB00834	-	-
P08246	DB00783	-	-
P08246	DB00784	-	-
P08246	DB00939	-	-
P08246	DB00831	-	-
P08246	DB00393	-	-
P08246	DB00789	-	-
P08246	DB00935	-	-
P08246	DB00390	-	-
P08246	DB00424	-	-
P08246	DB00394	-	-
P08246	DB00547	-	-
P08246	DB00544	-	-
P08246	DB00542	-	-
P08246	DB00543	-	-
P08246	DB00540	-	-
P08246	DB01018	-	-
P08246	DB01016	-	-
P08246	DB01015	-	-
P08246	DB01014	-	-
P08246	DB01011	-	-
P08246	DB00549	-	-
P08246	DB00233	-	-
P08246	DB00495	-	-
P08246	DB00490	-	-
P08246	DB00493	-	-
P08246	DB08826	-	-
P08246	DB00498	-	-
P08246	DB00499	-	-
P08246	DB00321	-	-
P08246	DB00945	-	-
P08246	DB00734	-	-
P08246	DB00731	-	-
P08246	DB00309	-	-
P08246	DB00733	-	-
P08246	DB00305	-	-
P08246	DB00738	-	-
P08246	DB00302	-	-
P08246	DB01606	-	-
P08246	DB01167	-	-
P08246	DB01166	-	-
P08246	DB01165	-	-
P08246	DB01162	-	-
P08246	DB00426	-	-
P08246	DB01168	-	-
P08246	DB01287	-	-
P08246	DB06697	-	-
P08246	DB01068	-	-
P08246	DB01069	-	-
P08246	DB00649	-	-
P08246	DB00648	-	-
P08246	DB00163	-	-
P08246	DB01062	-	-
P08246	DB01060	-	-
P08246	DB01061	-	-
P08246	DB00641	-	-
P08246	DB01067	-	-
P08246	DB00643	-	-
P08246	DB01065	-	-
P08246	DB01357	-	-
P08246	DB00749	-	-
P08246	DB00298	-	-
P08246	DB00744	-	-
P08246	DB00297	-	-
P08246	DB00740	-	-
P08246	DB00741	-	-
P08246	DB00742	-	-
P08246	DB00291	-	-
P08246	DB00465	-	-
P08246	DB00450	-	-
P08246	DB00467	-	-
P08246	DB00461	-	-
P08246	DB00462	-	-
P08246	DB00469	-	-
P08246	DB00452	-	-
P08246	DB00196	-	-
P08246	DB00190	-	-
P08246	DB00193	-	-
P08246	DB00199	-	-
P08246	DB00861	-	-
P08246	DB00860	-	-
P08246	DB00863	-	-
P08246	DB00325	-	-
P08246	DB00864	-	-
P08246	DB01113	-	-
P08246	DB01110	-	-
P08246	DB01114	-	-
P08246	DB01115	-	-
P08246	DB00177	-	-
P08246	DB01118	-	-
P08246	DB01119	-	-
P08246	DB00175	-	-
P08246	DB00263	-	-
P08246	DB00262	-	-
P08246	DB00266	-	-
P08246	DB00265	-	-
P08246	DB00264	-	-
P08246	DB00342	-	-
P08246	DB00343	-	-
P08246	DB00347	-	-
P08246	DB00423	-	-
P08246	DB00635	-	-
P08246	DB00636	-	-
P08246	DB00637	-	-
P08246	DB00630	-	-
P08246	DB01233	-	-
P08246	DB01232	-	-
P08246	DB01231	-	-
P08246	DB01235	-	-
P08246	DB01234	-	-
P08246	DB01045	-	-
P08246	DB00104	-	-
P08246	DB00518	-	-
P08246	DB00904	-	-
P08246	DB01047	-	-
P08246	DB00903	-	-
P08246	DB00513	-	-
P08246	DB00512	-	-
P08246	DB00515	-	-
P08246	DB00514	-	-
P08246	DB01026	-	-
P08246	DB00688	-	-
P08246	DB00122	-	-
P08246	DB01023	-	-
P08246	DB00126	-	-
P08246	DB01021	-	-
P08246	DB00681	-	-
P08246	DB00682	-	-
P08246	DB01435	-	-
P08246	DB00684	-	-
P08246	DB01436	-	-
P08246	DB00999	-	-
P08246	DB00995	-	-
P08246	DB00994	-	-
P08246	DB00997	-	-
P08246	DB00996	-	-
P08246	DB00991	-	-
P08246	DB04552	-	-
P08246	DB04573	-	-
P08246	DB00836	-	-
P08246	DB01095	-	-
P08246	DB01092	-	-
P08246	DB01091	-	-
P08246	DB00656	-	-
P08246	DB00655	-	-
P08246	DB01099	-	-
P08246	DB00651	-	-
P08246	DB01253	-	-
P08246	DB00166	-	-
P08246	DB00788	-	-
P08246	DB00420	-	-
P08246	DB01380	-	-
P08246	DB00391	-	-
P08246	DB00928	-	-
P08246	DB00841	-	-
P08246	DB00934	-	-
P08246	DB00381	-	-
P08246	DB00382	-	-
P08246	DB00844	-	-
P08246	DB00920	-	-
P08246	DB00433	-	-
P08246	DB00848	-	-
P08246	DB00437	-	-
P08246	DB00434	-	-
P08246	DB00396	-	-
P08246	DB01008	-	-
P08246	DB01009	-	-
P08246	DB00531	-	-
P08246	DB00537	-	-
P08246	DB01001	-	-
P08246	DB01002	-	-
P08246	DB01003	-	-
P08246	DB01005	-	-
P08246	DB01006	-	-
P08246	DB00541	-	-
P08246	DB00279	-	-
P08246	DB00274	-	-
P08246	DB00418	-	-
P08246	DB00277	-	-
P08246	DB00271	-	-
P08246	DB00376	-	-
P08246	DB00373	-	-
P08246	DB00583	-	-
P08246	DB00379	-	-
P08246	DB06150	-	-
P08246	DB01171	-	-
P08246	DB01172	-	-
P08246	DB01173	-	-
P08246	DB01174	-	-
P08246	DB01175	-	-
P08246	DB01176	-	-
P08246	DB01177	-	-
P08246	DB01179	-	-
P08246	DB00970	-	-
P08246	DB00977	-	-
P08246	DB00975	-	-
P08246	DB00502	-	-
P08246	DB00503	-	-
P08246	DB00500	-	-
P08246	DB00978	-	-
P08246	DB01581	-	-
P08246	DB01582	-	-
P08246	DB01053	-	-
P08246	DB00698	-	-
P08246	DB01050	-	-
P08246	DB01056	-	-
P08246	DB01055	-	-
P08246	DB01054	-	-
P08246	DB00692	-	-
P08246	DB01351	-	-
P08246	DB01059	-	-
P08246	DB01058	-	-
P08246	DB00696	-	-
P08246	DB01427	-	-
P08246	DB00694	-	-
P08246	DB00695	-	-
P08246	DB00987	-	-
P08246	DB00982	-	-
P08246	DB00981	-	-
P08246	DB00591	-	-
P08246	DB00590	-	-
P08246	DB00593	-	-
P08246	DB00595	-	-
P08246	DB00598	-	-
P08246	DB00778	-	-
P08246	DB00809	-	-
P08246	DB00808	-	-
P08246	DB00807	-	-
P08246	DB00806	-	-
P08246	DB00773	-	-
P08246	DB00804	-	-
P08246	DB00776	-	-
P08246	DB00477	-	-
P08246	DB00472	-	-
P08246	DB00471	-	-
P08246	DB00577	-	-
P08246	DB00576	-	-
P08246	DB00575	-	-
P08246	DB00573	-	-
P08246	DB00572	-	-
P08246	DB00571	-	-
P08246	DB00479	-	-
P08246	DB00186	-	-
P08246	DB00187	-	-
P08246	DB00184	-	-
P08246	DB00180	-	-
P08246	DB00181	-	-
P08246	DB00188	-	-
P08246	DB00871	-	-
P08246	DB00877	-	-
P08246	DB00874	-	-
P08246	DB01128	-	-
P08246	DB01121	-	-
P08246	DB01120	-	-
P08246	DB01127	-	-
P08246	DB01125	-	-
P08246	DB00330	-	-
P08246	DB00238	-	-
P08246	DB00239	-	-
P08246	DB00443	-	-
P08246	DB01087	-	-
P08246	DB00235	-	-
P08246	DB00600	-	-
P08246	DB00602	-	-
P08246	DB00604	-	-
P08246	DB01224	-	-
P08246	DB01221	-	-
P08246	DB01222	-	-
P08246	DB01223	-	-
P08246	DB00898	-	-
P08246	DB00482	-	-
P08246	DB00936	-	-
P08246	DB01339	-	-
P08246	DB00730	-	-
P08246	DB01148	-	-
P08246	DB01147	-	-
P08246	DB01143	-	-
P08246	DB01142	-	-
P08246	DB01082	-	-
P08246	DB00839	-	-
P08246	DB01086	-	-
P08246	DB00145	-	-
P08246	DB00623	-	-
P08246	DB00620	-	-
P08246	DB00627	-	-
P08246	DB00624	-	-
P08246	DB01242	-	-
P08246	DB01241	-	-
P08246	DB01248	-	-
P08246	DB01394	-	-
P08246	DB01396	-	-
P08246	DB06148	-	-
P08246	DB00169	-	-
P08246	DB01392	-	-
P08246	DB01393	-	-
P08246	DB06147	-	-
P08246	DB01399	-	-
P08246	DB00818	-	-
P08246	DB00819	-	-
P08246	DB00762	-	-
P08246	DB00763	-	-
P08246	DB00812	-	-
P08246	DB00766	-	-
P08246	DB00765	-	-
P08246	DB00568	-	-
P08246	DB00401	-	-
P08246	DB00400	-	-
P08246	DB00406	-	-
P08246	DB00404	-	-
P08246	DB00561	-	-
P08246	DB00563	-	-
P08246	DB00564	-	-
P08246	DB04841	-	-
P08246	DB00567	-	-
P08246	DB00759	-	-
P08246	DB01426	-	-
P08246	DB00884	-	-
P08246	DB00968	-	-
P08246	DB00969	-	-
P08246	DB00881	-	-
P08246	DB00967	-	-
P08246	DB00960	-	-
P08246	DB00961	-	-
P08246	DB00889	-	-
P08246	DB00963	-	-
P08246	DB06729	-	-
P08246	DB00249	-	-
P08246	DB00717	-	-
P08246	DB00715	-	-
P08246	DB00242	-	-
P08246	DB00245	-	-
P08246	DB00712	-	-
P08246	DB00247	-	-
P08246	DB00367	-	-
P08246	DB00365	-	-
P08246	DB00363	-	-
P08246	DB00361	-	-
P08246	DB01024	-	-
P08246	DB03166	-	-
P08246	DB00614	-	-
P08246	DB00615	-	-
P08246	DB01211	-	-
P08246	DB01210	-	-
P08246	DB01213	-	-
P08246	DB00619	-	-
P08246	DB01217	-	-
P08246	DB01216	-	-
P08246	DB06698	-	-
P08246	DB01188	-	-
P08246	DB01627	-	-
P08246	DB01181	-	-
P08246	DB06691	-	-
P08246	DB01183	-	-
P08246	DB01182	-	-
P08246	DB01184	-	-
P08246	DB01186	-	-
P08246	DB00685	-	-
P08246	DB00811	-	-
P08246	DB01029	-	-
P08246	DB00760	-	-
P08246	DB08807	-	-
P08246	DB04838	-	-
P08246	DB01599	-	-
P08246	DB01044	-	-
P08246	DB00814	-	-
P08246	DB01229	-	-
P08246	DB01595	-	-
P08246	DB01041	-	-
P08246	DB01042	-	-
P08246	DB00661	-	-
P08246	DB00669	-	-
P08246	DB00668	-	-
P08246	DB08873	-	-
P08246	DB00586	-	-
P08246	DB00584	-	-
P08246	DB00585	-	-
P08246	DB08797	-	-
P08246	DB00589	-	-
P08246	DB00339	-	-
P08246	DB00724	-	-
P08246	DB00725	-	-
P08246	DB00722	-	-
P08246	DB00721	-	-
P08246	DB00331	-	-
P08246	DB00446	-	-
P08246	DB00445	-	-
P08246	DB00335	-	-
P08246	DB00334	-	-
P08246	DB00441	-	-
P08246	DB01136	-	-
P08246	DB01137	-	-
P08246	DB01132	-	-
P08246	DB01206	-	-
P08246	DB00207	-	-
P08246	DB00206	-	-
P08246	DB00201	-	-
P08246	DB00202	-	-
P08246	DB00208	-	-
P08246	DB06770	-	-
P11511	-	TAXID:3627	Ursolic Acid
P11511	-	TAXID:65948	Apigenin
P11511	-	TAXID:74900	Quercetin
P11511	-	TAXID:51240	Stearic Acid
P11511	-	TAXID:51240	Palmitic Acid
P11511	-	TAXID:51240	Oleic Acid
P11511	-	TAXID:4081	Quercetin
P11511	-	TAXID:4081	Naringenin
P11511	-	TAXID:4081	Resveratrol
P11511	-	TAXID:4222	Quercetin
P11511	-	TAXID:4222	Alpha-Linolenic Acid
P11511	-	TAXID:4222	Oleic Acid
P11511	-	TAXID:4577	Quercetin
P11511	-	TAXID:4577	Naringenin
P11511	-	TAXID:36610	Apigenin
P11511	-	TAXID:36610	Quercetin
P11511	-	TAXID:4682	Quercetin
P11511	-	TAXID:4682	Metyrapone
P11511	-	TAXID:3712	Quercetin
P11511	-	TAXID:3712	Metyrapone
P11511	-	TAXID:114280	Quercetin
P11511	-	TAXID:4045	Apigenin
P11511	-	TAXID:4045	Quercetin
P11511	-	TAXID:4679	Quercetin
P11511	-	TAXID:4047	Quercetin
P11511	-	TAXID:4047	Oleic Acid
P11511	-	TAXID:78168	Apigenin
P11511	-	TAXID:4530	Stearic Acid
P11511	-	TAXID:4530	Palmitic Acid
P11511	-	TAXID:4530	Flavanone
P11511	-	TAXID:4530	Linoleic
P11511	-	TAXID:4530	Quercetin
P11511	-	TAXID:3708	Quercetin
P11511	-	TAXID:3708	Naringenin
P11511	-	TAXID:175228	Myricetin
P11511	-	TAXID:175228	Resveratrol
P11511	-	TAXID:175228	Quercetin
P11511	-	TAXID:89151	Apigenin
P11511	-	TAXID:32224	Ursolic Acid
P11511	-	TAXID:4146	Apigenin
P11511	-	TAXID:4146	Quercetin
P11511	-	TAXID:13731	Palmitic Acid
P11511	-	TAXID:3469	Quercetin
P11511	-	TAXID:29760	Quercetin
P11511	-	TAXID:29760	Resveratrol
P11511	-	TAXID:85571	Flavanone
P11511	-	TAXID:3747	Quercetin
P11511	-	TAXID:3747	Naringenin
P11511	-	TAXID:3747	Resveratrol
P11511	-	TAXID:4006	Stearic Acid
P11511	-	TAXID:4006	Alpha-Linolenic Acid
P11511	-	TAXID:4006	Oleic Acid
P11511	-	TAXID:120290	Quercetin
P11511	-	TAXID:120290	Naringenin
P11511	-	TAXID:120290	Ursolic Acid
P11511	-	TAXID:32247	Quercetin
P11511	-	TAXID:157791	Liquiritigenin
P11511	-	TAXID:3818	Resveratrol
P11511	-	TAXID:171929	Stearic Acid
P11511	-	TAXID:171929	Linoleic
P11511	-	TAXID:171929	Oleic Acid
P11511	-	TAXID:35925	Quercetin
P11511	-	TAXID:35925	Ursolic Acid
P11511	-	TAXID:49827	Flavanone
P11511	-	TAXID:49827	Isolicoflavonol
P11511	-	TAXID:49827	Dihydrotestosterone
P11511	-	TAXID:49827	Liquiritigenin
P11511	-	TAXID:49827	Naringenin
P11511	-	TAXID:49827	Nordihydroguaiaretic Acid
P11511	-	TAXID:51089	Myristic Acid
P11511	-	TAXID:3888	Quercetin
P11511	-	TAXID:3888	Naringenin
P11511	-	TAXID:3888	Liquiritigenin
P11511	-	TAXID:3888	Oleic Acid
P11511	-	TAXID:3888	Biochanin A
P11511	-	TAXID:4565	Quercetin
P11511	-	TAXID:4565	Resveratrol
P11511	-	TAXID:94328	Apigenin
P11511	-	TAXID:94328	Oleic Acid
P11511	-	TAXID:94328	Palmitic Acid
P11511	-	TAXID:4236	Quercetin
P11511	-	TAXID:4236	Alpha-Linolenic Acid
P11511	-	TAXID:29780	Quercetin
P11511	-	TAXID:50225	Quercetin
P11511	-	TAXID:3885	Quercetin
P11511	-	TAXID:3621	Resveratrol
P11511	-	TAXID:3847	Flavanone
P11511	-	TAXID:3847	Linoleic
P11511	-	TAXID:3847	Apigenin
P11511	-	TAXID:3847	Liquiritigenin
P11511	-	TAXID:3847	Quercetin
P11511	-	TAXID:3847	Naringenin
P11511	-	TAXID:3847	74-Dihydroxyflavone
P11511	-	TAXID:4681	Quercetin
P11511	-	TAXID:4072	Apigenin
P11511	-	TAXID:4072	Quercetin
P11511	-	TAXID:4072	Myristic Acid
P11511	-	TAXID:180772	Quercetin
P11511	-	TAXID:180772	Resveratrol
P11511	-	TAXID:13427	Palmitic Acid
P11511	-	TAXID:13427	Quercetin
P11511	-	TAXID:4442	Apigenin
P11511	-	TAXID:4442	Naringenin
P11511	-	TAXID:4442	Resveratrol
P11511	-	TAXID:4442	Quercetin
P11511	-	TAXID:48038	Quercetin
P11511	-	TAXID:48038	Oleic Acid
P11511	-	TAXID:74645	Quercetin
P11511	-	TAXID:22663	Myricetin
P11511	-	TAXID:22663	Myristic Acid
P11511	-	TAXID:22663	Quercetin
P11511	-	TAXID:22663	Ursolic Acid
P11511	-	TAXID:3435	Oleic Acid
P11511	-	TAXID:3711	Stearic Acid
P11511	-	TAXID:3711	Oleic Acid
P11511	-	TAXID:3711	Resveratrol
P11511	-	TAXID:3711	Linoleic
P11511	-	TAXID:3711	Alpha-Linolenic Acid
P11511	-	TAXID:3711	Quercetin
P11511	-	TAXID:3711	Palmitic Acid
P11511	-	TAXID:3711	Ursolic Acid
P11511	-	TAXID:3659	Quercetin
P11511	-	TAXID:3617	Palmitic Acid
P11511	-	TAXID:3617	Quercetin
P11511	-	TAXID:2711	Flavanone
P11511	DB01065	-	-
P11511	DB00179	-	-
P11511	DB00357	-	-
P11511	DB00990	-	-
P11511	DB00292	-	-
P11511	DB01110	-	-
P11511	DB01217	-	-
P11511	DB00624	-	-
P11511	DB01026	-	-
P11511	DB00159	-	-
P11511	DB00894	-	-
P11511	DB01006	-	-
P11511	DB06689	-	-
P11511	DB01011	-	-
P11511	DB08905	-	-
P11511	DB00257	-	-
P11511	DB01437	-	-
P11511	DB00132	-	-

## Sheet: Musculoskeletal
Protein	Drug name	Plant source	Plant compound
P09917	-	TAXID:36610	Quercetin
P09917	-	TAXID:36610	Kaempferol
P09917	-	TAXID:74900	Quercetin
P09917	-	TAXID:74900	Protocatechuic Acid
P09917	-	TAXID:74900	Kaempferol
P09917	-	TAXID:74900	Caffeic Acid
P09917	-	TAXID:51240	Protocatechuic Acid
P09917	-	TAXID:51240	Caffeic Acid
P09917	-	TAXID:4081	Quercetin
P09917	-	TAXID:4222	Quercetin
P09917	-	TAXID:4577	Quercetin
P09917	-	TAXID:4577	Kaempferol
P09917	-	TAXID:4577	Caffeic Acid
P09917	-	TAXID:29760	Quercetin
P09917	-	TAXID:29760	Caffeic Acid
P09917	-	TAXID:4006	Pinoresinol
P09917	-	TAXID:3712	Quercetin
P09917	-	TAXID:3712	Kaempferol
P09917	-	TAXID:3712	Caffeic Acid
P09917	-	TAXID:114280	Quercetin
P09917	-	TAXID:114280	Protocatechuic Acid
P09917	-	TAXID:114280	Caffeic Acid
P09917	-	TAXID:4045	Quercetin
P09917	-	TAXID:4045	Kaempferol
P09917	-	TAXID:4045	Caffeic Acid
P09917	-	TAXID:4679	Quercetin
P09917	-	TAXID:4679	Protocatechuic Acid
P09917	-	TAXID:4679	Kaempferol
P09917	-	TAXID:4047	Quercetin
P09917	-	TAXID:4047	Kaempferol
P09917	-	TAXID:4120	Caffeic Acid
P09917	-	TAXID:4530	Quercetin
P09917	-	TAXID:4530	Guaiacol
P09917	-	TAXID:4530	Kaempferol
P09917	-	TAXID:171929	Guaiacol
P09917	-	TAXID:175228	Quercetin
P09917	-	TAXID:175228	Protocatechuic Acid
P09917	-	TAXID:3635	Guaiacol
P09917	-	TAXID:32224	Protocatechuic Acid
P09917	-	TAXID:4146	Quercetin
P09917	-	TAXID:4146	Kaempferol
P09917	-	TAXID:4146	Caffeic Acid
P09917	-	TAXID:65948	Caffeic Acid
P09917	-	TAXID:3469	Quercetin
P09917	-	TAXID:3469	Kaempferol
P09917	-	TAXID:3864	Caffeic Acid
P09917	-	TAXID:3864	Gentisic Acid
P09917	-	TAXID:3621	Protocatechuic Acid
P09917	-	TAXID:3621	Caffeic Acid
P09917	-	TAXID:29780	Quercetin
P09917	-	TAXID:29780	Protocatechuic Acid
P09917	-	TAXID:29780	Kaempferol
P09917	-	TAXID:29780	Caffeic Acid
P09917	-	TAXID:29780	Gentisic Acid
P09917	-	TAXID:3747	Guaiacol
P09917	-	TAXID:3747	Protocatechuic Acid
P09917	-	TAXID:3747	Kaempferol
P09917	-	TAXID:3747	Caffeic Acid
P09917	-	TAXID:3747	Quercetin
P09917	-	TAXID:3747	Gentisic Acid
P09917	-	TAXID:3617	Quercetin
P09917	-	TAXID:13731	Guaiacol
P09917	-	TAXID:3708	Quercetin
P09917	-	TAXID:3708	Thiouracil
P09917	-	TAXID:3708	Kaempferol
P09917	-	TAXID:3708	Caffeic Acid
P09917	-	TAXID:32247	Quercetin
P09917	-	TAXID:32247	Kaempferol
P09917	-	TAXID:4682	Quercetin
P09917	-	TAXID:4681	Quercetin
P09917	-	TAXID:4681	Protocatechuic Acid
P09917	-	TAXID:4681	Kaempferol
P09917	-	TAXID:4681	Caffeic Acid
P09917	-	TAXID:4513	Caffeic Acid
P09917	-	TAXID:49827	Nordihydroguaiaretic Acid
P09917	-	TAXID:49827	Caffeic Acid
P09917	-	TAXID:35925	Quercetin
P09917	-	TAXID:35925	Kaempferol
P09917	-	TAXID:35925	Caffeic Acid
P09917	-	TAXID:3888	Quercetin
P09917	-	TAXID:3888	Kaempferol
P09917	-	TAXID:4565	Quercetin
P09917	-	TAXID:4565	Guaiacol
P09917	-	TAXID:3983	Pinoresinol
P09917	-	TAXID:3983	Scopoletin
P09917	-	TAXID:3983	Protocatechuic Acid
P09917	-	TAXID:4236	Quercetin
P09917	-	TAXID:4236	Pyrocatechol
P09917	-	TAXID:151069	Protocatechuic Acid
P09917	-	TAXID:151069	Kaempferol
P09917	-	TAXID:151069	Gentisic Acid
P09917	-	TAXID:3885	Quercetin
P09917	-	TAXID:128608	Caffeic Acid
P09917	-	TAXID:4072	Quercetin
P09917	-	TAXID:4072	Honokiol
P09917	-	TAXID:4072	4-Methoxyhonokiol
P09917	-	TAXID:180772	Quercetin
P09917	-	TAXID:180772	Kaempferol
P09917	-	TAXID:13427	Quercetin
P09917	-	TAXID:13427	Scopoletin
P09917	-	TAXID:13427	Caffeic Acid
P09917	-	TAXID:94328	Honokiol
P09917	-	TAXID:4442	Quercetin
P09917	-	TAXID:4442	Guaiacol
P09917	-	TAXID:4442	Kaempferol
P09917	-	TAXID:4442	Caffeic Acid
P09917	-	TAXID:13216	Pyrocatechol
P09917	-	TAXID:4498	Scopoletin
P09917	-	TAXID:4498	Caffeic Acid
P09917	-	TAXID:48038	Quercetin
P09917	-	TAXID:48038	Kaempferol
P09917	-	TAXID:120290	Quercetin
P09917	-	TAXID:120290	Kaempferol
P09917	-	TAXID:120290	Caffeic Acid
P09917	-	TAXID:74645	Quercetin
P09917	-	TAXID:74645	Kaempferol
P09917	-	TAXID:22663	Quercetin
P09917	-	TAXID:3847	Quercetin
P09917	-	TAXID:3847	Kaempferol
P09917	-	TAXID:3711	Quercetin
P09917	-	TAXID:3711	Kaempferol
P09917	-	TAXID:3711	Caffeic Acid
P09917	-	TAXID:3659	Quercetin
P09917	-	TAXID:3659	Kaempferol
P09917	-	TAXID:50225	Quercetin
P09917	-	TAXID:4113	Protocatechuic Acid
P09917	-	TAXID:4113	Caffeic Acid
P09917	-	TAXID:4111	Guaiacol
P09917	-	TAXID:4111	Caffeic Acid
P09917	DB00179	-	-
P09917	DB00788	-	-
P09917	DB01009	-	-
P09917	DB00744	-	-
P09917	DB00341	-	-
P09917	DB00233	-	-
P09917	DB00920	-	-
P09917	DB00328	-	-
P09917	DB01050	-	-
P09917	DB00551	-	-
P09917	DB01243	-	-
P09917	DB00936	-	-
P09917	DB00482	-	-
P09917	DB00967	-	-
P09917	DB00455	-	-
P14780	-	TAXID:65948	Luteolin
P14780	-	TAXID:29760	Quercetin
P14780	-	TAXID:29760	(+)-Dihydromyricetin
P14780	-	TAXID:74900	Quercetin
P14780	-	TAXID:74900	Protocatechuic Acid
P14780	-	TAXID:51240	Protocatechuic Acid
P14780	-	TAXID:4081	Quercetin
P14780	-	TAXID:4442	Luteolin
P14780	-	TAXID:4442	Quercetin
P14780	-	TAXID:4442	Guaiacol
P14780	-	TAXID:4577	Quercetin
P14780	-	TAXID:36610	Luteolin
P14780	-	TAXID:36610	Quercetin
P14780	-	TAXID:4682	Quercetin
P14780	-	TAXID:3712	Quercetin
P14780	-	TAXID:114280	Quercetin
P14780	-	TAXID:114280	Protocatechuic Acid
P14780	-	TAXID:4045	Luteolin
P14780	-	TAXID:4045	Quercetin
P14780	-	TAXID:4679	Quercetin
P14780	-	TAXID:4679	Protocatechuic Acid
P14780	-	TAXID:4679	Taxifolin
P14780	-	TAXID:4047	Luteolin
P14780	-	TAXID:4047	Quercetin
P14780	-	TAXID:78168	Luteolin
P14780	-	TAXID:4530	Quercetin
P14780	-	TAXID:4530	Guaiacol
P14780	-	TAXID:4202	(+)-Dihydromyricetin
P14780	-	TAXID:4681	Quercetin
P14780	-	TAXID:4681	Protocatechuic Acid
P14780	-	TAXID:175228	Quercetin
P14780	-	TAXID:175228	Protocatechuic Acid
P14780	-	TAXID:175228	Taxifolin
P14780	-	TAXID:3635	Guaiacol
P14780	-	TAXID:32224	Protocatechuic Acid
P14780	-	TAXID:4146	Luteolin
P14780	-	TAXID:4146	Quercetin
P14780	-	TAXID:13731	Guaiacol
P14780	-	TAXID:3469	Quercetin
P14780	-	TAXID:3864	Luteolin
P14780	-	TAXID:3621	Protocatechuic Acid
P14780	-	TAXID:29780	Quercetin
P14780	-	TAXID:29780	Protocatechuic Acid
P14780	-	TAXID:3747	Quercetin
P14780	-	TAXID:3747	Guaiacol
P14780	-	TAXID:3747	Protocatechuic Acid
P14780	-	TAXID:3708	Luteolin
P14780	-	TAXID:3708	Quercetin
P14780	-	TAXID:120290	Quercetin
P14780	-	TAXID:32247	Quercetin
P14780	-	TAXID:157791	Isoliquiritigenin
P14780	-	TAXID:157791	Liquiritigenin
P14780	-	TAXID:171929	Guaiacol
P14780	-	TAXID:49827	Isoliquiritigenin
P14780	-	TAXID:49827	Liquiritigenin
P14780	-	TAXID:35925	Quercetin
P14780	-	TAXID:3888	Quercetin
P14780	-	TAXID:3888	Liquiritigenin
P14780	-	TAXID:4565	Quercetin
P14780	-	TAXID:4565	Guaiacol
P14780	-	TAXID:3983	Protocatechuic Acid
P14780	-	TAXID:4236	Pyrocatechol
P14780	-	TAXID:4236	Quercetin
P14780	-	TAXID:151069	Protocatechuic Acid
P14780	-	TAXID:151069	Taxifolin
P14780	-	TAXID:41241	Procyanidin C1
P14780	-	TAXID:3885	Quercetin
P14780	-	TAXID:50225	Luteolin
P14780	-	TAXID:50225	Quercetin
P14780	-	TAXID:4072	Luteolin
P14780	-	TAXID:4072	Quercetin
P14780	-	TAXID:180772	Quercetin
P14780	-	TAXID:13427	Quercetin
P14780	-	TAXID:4222	Luteolin
P14780	-	TAXID:4222	Quercetin
P14780	-	TAXID:13216	Pyrocatechol
P14780	-	TAXID:48038	Luteolin
P14780	-	TAXID:48038	Quercetin
P14780	-	TAXID:74645	Quercetin
P14780	-	TAXID:22663	Quercetin
P14780	-	TAXID:3847	Quercetin
P14780	-	TAXID:3847	Isoliquiritigenin
P14780	-	TAXID:3847	Liquiritigenin
P14780	-	TAXID:3711	Quercetin
P14780	-	TAXID:3659	Quercetin
P14780	-	TAXID:3617	Quercetin
P14780	-	TAXID:4113	Protocatechuic Acid
P14780	-	TAXID:4111	Guaiacol
P14780	DB01064	-	-
P14780	DB01097	-	-
P14780	DB00153	-	-
P14780	DB00709	-	-
P14780	DB00258	-	-
P14780	DB00259	-	-
P14780	DB00252	-	-
P14780	DB00701	-	-
P14780	DB00251	-	-
P14780	DB00704	-	-
P14780	DB00257	-	-
P14780	DB00254	-	-
P14780	DB00255	-	-
P14780	DB00313	-	-
P14780	DB00310	-	-
P14780	DB00316	-	-
P14780	DB00091	-	-
P14780	DB00319	-	-
P14780	DB00478	-	-
P14780	DB00570	-	-
P14780	DB00882	-	-
P14780	DB01156	-	-
P14780	DB01151	-	-
P14780	DB00650	-	-
P14780	DB00227	-	-
P14780	DB00224	-	-
P14780	DB00222	-	-
P14780	DB00220	-	-
P14780	DB00962	-	-
P14780	DB06710	-	-
P14780	DB03255	-	-
P14780	DB00178	-	-
P14780	DB01075	-	-
P14780	DB01074	-	-
P14780	DB01077	-	-
P14780	DB01076	-	-
P14780	DB00672	-	-
P14780	DB00674	-	-
P14780	DB00675	-	-
P14780	DB00679	-	-
P14780	DB01275	-	-
P14780	DB00795	-	-
P14780	DB00794	-	-
P14780	DB00793	-	-
P14780	DB00823	-	-
P14780	DB00822	-	-
P14780	DB00415	-	-
P14780	DB00829	-	-
P14780	DB00411	-	-
P14780	DB00412	-	-
P14780	DB00798	-	-
P14780	DB00555	-	-
P14780	DB00554	-	-
P14780	DB00551	-	-
P14780	DB00550	-	-
P14780	DB00553	-	-
P14780	DB00959	-	-
P14780	DB00489	-	-
P14780	DB00488	-	-
P14780	DB00483	-	-
P14780	DB00950	-	-
P14780	DB00481	-	-
P14780	DB00487	-	-
P14780	DB00484	-	-
P14780	DB01103	-	-
P14780	DB01105	-	-
P14780	DB01104	-	-
P14780	DB00214	-	-
P14780	DB00215	-	-
P14780	DB00359	-	-
P14780	DB00357	-	-
P14780	DB00356	-	-
P14780	DB00353	-	-
P14780	DB00350	-	-
P14780	DB01208	-	-
P14780	DB01203	-	-
P14780	DB01200	-	-
P14780	DB01201	-	-
P14780	DB01611	-	-
P14780	DB01204	-	-
P14780	DB01205	-	-
P14780	DB01199	-	-
P14780	DB01193	-	-
P14780	DB01190	-	-
P14780	DB01191	-	-
P14780	DB01197	-	-
P14780	DB01296	-	-
P14780	DB01299	-	-
P14780	DB00915	-	-
P14780	DB00384	-	-
P14780	DB00916	-	-
P14780	DB00911	-	-
P14780	DB00529	-	-
P14780	DB00524	-	-
P14780	DB00525	-	-
P14780	DB00919	-	-
P14780	DB00523	-	-
P14780	DB01035	-	-
P14780	DB01037	-	-
P14780	DB01408	-	-
P14780	DB01030	-	-
P14780	DB01032	-	-
P14780	DB01406	-	-
P14780	DB01407	-	-
P14780	DB01400	-	-
P14780	DB00846	-	-
P14780	DB01039	-	-
P14780	DB00951	-	-
P14780	DB00421	-	-
P14780	DB00285	-	-
P14780	DB00284	-	-
P14780	DB00281	-	-
P14780	DB00283	-	-
P14780	DB00437	-	-
P14780	DB00328	-	-
P14780	DB00750	-	-
P14780	DB00756	-	-
P14780	DB00755	-	-
P14780	DB00322	-	-
P14780	DB00320	-	-
P14780	DB00758	-	-
P14780	DB00455	-	-
P14780	DB00324	-	-
P14780	DB00457	-	-
P14780	DB04571	-	-
P14780	DB00420	-	-
P14780	DB00859	-	-
P14780	DB00857	-	-
P14780	DB00850	-	-
P14780	DB00851	-	-
P14780	DB00780	-	-
P14780	DB00428	-	-
P14780	DB00834	-	-
P14780	DB00783	-	-
P14780	DB00784	-	-
P14780	DB00786	-	-
P14780	DB00831	-	-
P14780	DB00393	-	-
P14780	DB00936	-	-
P14780	DB00935	-	-
P14780	DB00390	-	-
P14780	DB00424	-	-
P14780	DB00394	-	-
P14780	DB00547	-	-
P14780	DB00544	-	-
P14780	DB00542	-	-
P14780	DB00543	-	-
P14780	DB00540	-	-
P14780	DB01018	-	-
P14780	DB01016	-	-
P14780	DB01015	-	-
P14780	DB01014	-	-
P14780	DB01011	-	-
P14780	DB00549	-	-
P14780	DB00233	-	-
P14780	DB00495	-	-
P14780	DB00490	-	-
P14780	DB00493	-	-
P14780	DB08826	-	-
P14780	DB00498	-	-
P14780	DB00499	-	-
P14780	DB00321	-	-
P14780	DB00945	-	-
P14780	DB00734	-	-
P14780	DB00731	-	-
P14780	DB00309	-	-
P14780	DB00733	-	-
P14780	DB00305	-	-
P14780	DB00738	-	-
P14780	DB00302	-	-
P14780	DB01606	-	-
P14780	DB01167	-	-
P14780	DB01166	-	-
P14780	DB01165	-	-
P14780	DB01162	-	-
P14780	DB00426	-	-
P14780	DB01168	-	-
P14780	DB01287	-	-
P14780	DB06697	-	-
P14780	DB01068	-	-
P14780	DB01069	-	-
P14780	DB00649	-	-
P14780	DB00648	-	-
P14780	DB00163	-	-
P14780	DB01062	-	-
P14780	DB01060	-	-
P14780	DB01061	-	-
P14780	DB00641	-	-
P14780	DB01067	-	-
P14780	DB00643	-	-
P14780	DB01065	-	-
P14780	DB01357	-	-
P14780	DB00749	-	-
P14780	DB00298	-	-
P14780	DB00744	-	-
P14780	DB00297	-	-
P14780	DB00740	-	-
P14780	DB00741	-	-
P14780	DB00742	-	-
P14780	DB00291	-	-
P14780	DB00465	-	-
P14780	DB00450	-	-
P14780	DB00467	-	-
P14780	DB00461	-	-
P14780	DB00462	-	-
P14780	DB00469	-	-
P14780	DB00452	-	-
P14780	DB00196	-	-
P14780	DB00190	-	-
P14780	DB00193	-	-
P14780	DB00199	-	-
P14780	DB00861	-	-
P14780	DB00860	-	-
P14780	DB00863	-	-
P14780	DB00325	-	-
P14780	DB00864	-	-
P14780	DB01113	-	-
P14780	DB01110	-	-
P14780	DB01114	-	-
P14780	DB01115	-	-
P14780	DB00177	-	-
P14780	DB01118	-	-
P14780	DB01119	-	-
P14780	DB00175	-	-
P14780	DB00263	-	-
P14780	DB00262	-	-
P14780	DB00266	-	-
P14780	DB00265	-	-
P14780	DB00264	-	-
P14780	DB00342	-	-
P14780	DB00343	-	-
P14780	DB00347	-	-
P14780	DB00423	-	-
P14780	DB00635	-	-
P14780	DB00636	-	-
P14780	DB00637	-	-
P14780	DB00630	-	-
P14780	DB01233	-	-
P14780	DB01232	-	-
P14780	DB01231	-	-
P14780	DB01235	-	-
P14780	DB01234	-	-
P14780	DB00104	-	-
P14780	DB00518	-	-
P14780	DB00904	-	-
P14780	DB01047	-	-
P14780	DB00903	-	-
P14780	DB00513	-	-
P14780	DB00512	-	-
P14780	DB00515	-	-
P14780	DB00514	-	-
P14780	DB01026	-	-
P14780	DB00688	-	-
P14780	DB00122	-	-
P14780	DB01023	-	-
P14780	DB00126	-	-
P14780	DB01021	-	-
P14780	DB00681	-	-
P14780	DB00682	-	-
P14780	DB01435	-	-
P14780	DB00684	-	-
P14780	DB01436	-	-
P14780	DB00999	-	-
P14780	DB00995	-	-
P14780	DB00994	-	-
P14780	DB00997	-	-
P14780	DB00996	-	-
P14780	DB00991	-	-
P14780	DB04552	-	-
P14780	DB04573	-	-
P14780	DB00836	-	-
P14780	DB01095	-	-
P14780	DB01092	-	-
P14780	DB01091	-	-
P14780	DB00656	-	-
P14780	DB00655	-	-
P14780	DB01099	-	-
P14780	DB00651	-	-
P14780	DB01253	-	-
P14780	DB00166	-	-
P14780	DB00939	-	-
P14780	DB00788	-	-
P14780	DB00789	-	-
P14780	DB01380	-	-
P14780	DB00391	-	-
P14780	DB00928	-	-
P14780	DB00841	-	-
P14780	DB00934	-	-
P14780	DB00381	-	-
P14780	DB00382	-	-
P14780	DB00844	-	-
P14780	DB00920	-	-
P14780	DB00433	-	-
P14780	DB00848	-	-
P14780	DB00389	-	-
P14780	DB00434	-	-
P14780	DB00396	-	-
P14780	DB01008	-	-
P14780	DB01009	-	-
P14780	DB00531	-	-
P14780	DB00537	-	-
P14780	DB01001	-	-
P14780	DB01002	-	-
P14780	DB01003	-	-
P14780	DB01005	-	-
P14780	DB01006	-	-
P14780	DB00541	-	-
P14780	DB00279	-	-
P14780	DB00274	-	-
P14780	DB00418	-	-
P14780	DB00277	-	-
P14780	DB00271	-	-
P14780	DB00376	-	-
P14780	DB00373	-	-
P14780	DB00379	-	-
P14780	DB06150	-	-
P14780	DB01171	-	-
P14780	DB01172	-	-
P14780	DB01173	-	-
P14780	DB01174	-	-
P14780	DB01175	-	-
P14780	DB01176	-	-
P14780	DB01177	-	-
P14780	DB01179	-	-
P14780	DB00970	-	-
P14780	DB00977	-	-
P14780	DB00975	-	-
P14780	DB00502	-	-
P14780	DB00503	-	-
P14780	DB00500	-	-
P14780	DB00978	-	-
P14780	DB01581	-	-
P14780	DB01582	-	-
P14780	DB01053	-	-
P14780	DB00698	-	-
P14780	DB01050	-	-
P14780	DB01056	-	-
P14780	DB01055	-	-
P14780	DB01054	-	-
P14780	DB00692	-	-
P14780	DB01351	-	-
P14780	DB01059	-	-
P14780	DB01058	-	-
P14780	DB00696	-	-
P14780	DB01427	-	-
P14780	DB00694	-	-
P14780	DB00695	-	-
P14780	DB00987	-	-
P14780	DB00982	-	-
P14780	DB00981	-	-
P14780	DB00591	-	-
P14780	DB00590	-	-
P14780	DB00593	-	-
P14780	DB00595	-	-
P14780	DB00598	-	-
P14780	DB00778	-	-
P14780	DB00809	-	-
P14780	DB00808	-	-
P14780	DB00807	-	-
P14780	DB00806	-	-
P14780	DB00773	-	-
P14780	DB00804	-	-
P14780	DB00776	-	-
P14780	DB00477	-	-
P14780	DB00472	-	-
P14780	DB00471	-	-
P14780	DB00577	-	-
P14780	DB00576	-	-
P14780	DB00575	-	-
P14780	DB00573	-	-
P14780	DB00572	-	-
P14780	DB00571	-	-
P14780	DB00479	-	-
P14780	DB00186	-	-
P14780	DB00187	-	-
P14780	DB00184	-	-
P14780	DB00180	-	-
P14780	DB00181	-	-
P14780	DB00878	-	-
P14780	DB00871	-	-
P14780	DB00877	-	-
P14780	DB00874	-	-
P14780	DB01128	-	-
P14780	DB01121	-	-
P14780	DB01120	-	-
P14780	DB01127	-	-
P14780	DB01125	-	-
P14780	DB00330	-	-
P14780	DB00238	-	-
P14780	DB00239	-	-
P14780	DB00443	-	-
P14780	DB01087	-	-
P14780	DB00235	-	-
P14780	DB00600	-	-
P14780	DB00602	-	-
P14780	DB00604	-	-
P14780	DB01224	-	-
P14780	DB01221	-	-
P14780	DB01222	-	-
P14780	DB01223	-	-
P14780	DB00898	-	-
P14780	DB00482	-	-
P14780	DB01339	-	-
P14780	DB00730	-	-
P14780	DB01148	-	-
P14780	DB01147	-	-
P14780	DB01143	-	-
P14780	DB01142	-	-
P14780	DB01082	-	-
P14780	DB00839	-	-
P14780	DB01086	-	-
P14780	DB00145	-	-
P14780	DB00623	-	-
P14780	DB00620	-	-
P14780	DB00627	-	-
P14780	DB00624	-	-
P14780	DB01242	-	-
P14780	DB01241	-	-
P14780	DB01248	-	-
P14780	DB01394	-	-
P14780	DB01396	-	-
P14780	DB06148	-	-
P14780	DB00169	-	-
P14780	DB01392	-	-
P14780	DB01393	-	-
P14780	DB06147	-	-
P14780	DB01399	-	-
P14780	DB00818	-	-
P14780	DB00819	-	-
P14780	DB00762	-	-
P14780	DB00763	-	-
P14780	DB00812	-	-
P14780	DB00814	-	-
P14780	DB00765	-	-
P14780	DB00568	-	-
P14780	DB00401	-	-
P14780	DB00400	-	-
P14780	DB00406	-	-
P14780	DB00404	-	-
P14780	DB00561	-	-
P14780	DB00563	-	-
P14780	DB00564	-	-
P14780	DB04841	-	-
P14780	DB00567	-	-
P14780	DB00759	-	-
P14780	DB01426	-	-
P14780	DB00884	-	-
P14780	DB00968	-	-
P14780	DB00969	-	-
P14780	DB00881	-	-
P14780	DB00967	-	-
P14780	DB00960	-	-
P14780	DB00961	-	-
P14780	DB00889	-	-
P14780	DB00963	-	-
P14780	DB06729	-	-
P14780	DB00249	-	-
P14780	DB00717	-	-
P14780	DB00715	-	-
P14780	DB00242	-	-
P14780	DB00245	-	-
P14780	DB00712	-	-
P14780	DB00247	-	-
P14780	DB00367	-	-
P14780	DB00365	-	-
P14780	DB00363	-	-
P14780	DB00361	-	-
P14780	DB01024	-	-
P14780	DB03166	-	-
P14780	DB00614	-	-
P14780	DB00615	-	-
P14780	DB01211	-	-
P14780	DB01210	-	-
P14780	DB01213	-	-
P14780	DB00619	-	-
P14780	DB01217	-	-
P14780	DB01216	-	-
P14780	DB06698	-	-
P14780	DB01188	-	-
P14780	DB01627	-	-
P14780	DB01181	-	-
P14780	DB06691	-	-
P14780	DB01183	-	-
P14780	DB01182	-	-
P14780	DB01184	-	-
P14780	DB01186	-	-
P14780	DB00685	-	-
P14780	DB00811	-	-
P14780	DB01029	-	-
P14780	DB00760	-	-
P14780	DB08807	-	-
P14780	DB04838	-	-
P14780	DB01599	-	-
P14780	DB01044	-	-
P14780	DB01045	-	-
P14780	DB01229	-	-
P14780	DB01595	-	-
P14780	DB01041	-	-
P14780	DB01042	-	-
P14780	DB00661	-	-
P14780	DB00669	-	-
P14780	DB00668	-	-
P14780	DB00583	-	-
P14780	DB00586	-	-
P14780	DB00584	-	-
P14780	DB00585	-	-
P14780	DB08797	-	-
P14780	DB00589	-	-
P14780	DB00339	-	-
P14780	DB00724	-	-
P14780	DB00725	-	-
P14780	DB00722	-	-
P14780	DB00720	-	-
P14780	DB00721	-	-
P14780	DB00331	-	-
P14780	DB00446	-	-
P14780	DB00445	-	-
P14780	DB00335	-	-
P14780	DB00334	-	-
P14780	DB00441	-	-
P14780	DB01136	-	-
P14780	DB01137	-	-
P14780	DB01132	-	-
P14780	DB01206	-	-
P14780	DB00207	-	-
P14780	DB00206	-	-
P14780	DB00201	-	-
P14780	DB00202	-	-
P14780	DB00208	-	-
P14780	DB06770	-	-
P03372	-	TAXID:65948	Caffeic Acid
P03372	-	TAXID:74900	P-Coumaric Acid
P03372	-	TAXID:74900	Protocatechuic Acid
P03372	-	TAXID:74900	Vanillic Acid
P03372	-	TAXID:74900	Caffeic Acid
P03372	-	TAXID:74900	Kaempferol
P03372	-	TAXID:74900	Quercetin
P03372	-	TAXID:51240	Protocatechuic Acid
P03372	-	TAXID:51240	Caffeic Acid
P03372	-	TAXID:4081	Quercetin
P03372	-	TAXID:4081	Resveratrol
P03372	-	TAXID:4081	Naringenin
P03372	-	TAXID:4442	Resveratrol
P03372	-	TAXID:4442	Kaempferol
P03372	-	TAXID:4442	Caffeic Acid
P03372	-	TAXID:4442	Genistein
P03372	-	TAXID:4442	Daidzein
P03372	-	TAXID:4442	Quercetin
P03372	-	TAXID:4442	Naringenin
P03372	-	TAXID:4577	3-O-Neohesperidoside-3,4,5,7-Tetrahydroxy-3-Methoxyflavone
P03372	-	TAXID:4577	P-Coumaric Acid
P03372	-	TAXID:4577	Kaempferol
P03372	-	TAXID:4577	Caffeic Acid
P03372	-	TAXID:4577	Quercetin
P03372	-	TAXID:4577	Naringenin
P03372	-	TAXID:13894	Vanillic Acid
P03372	-	TAXID:29760	Quercetin
P03372	-	TAXID:29760	Resveratrol
P03372	-	TAXID:29760	Caffeic Acid
P03372	-	TAXID:35925	Quercetin
P03372	-	TAXID:35925	Kaempferol
P03372	-	TAXID:35925	Caffeic Acid
P03372	-	TAXID:114280	P-Coumaric Acid
P03372	-	TAXID:114280	Quercetin
P03372	-	TAXID:114280	Protocatechuic Acid
P03372	-	TAXID:114280	Vanillic Acid
P03372	-	TAXID:114280	Caffeic Acid
P03372	-	TAXID:4513	Caffeic Acid
P03372	-	TAXID:4679	Quercetin
P03372	-	TAXID:4679	Protocatechuic Acid
P03372	-	TAXID:4679	Kaempferol
P03372	-	TAXID:4047	Quercetin
P03372	-	TAXID:4047	Kaempferol
P03372	-	TAXID:4120	Trans-Cinnamic Acid
P03372	-	TAXID:4120	Caffeic Acid
P03372	-	TAXID:3708	Ferulate
P03372	-	TAXID:3708	Kaempferol
P03372	-	TAXID:3708	Caffeic Acid
P03372	-	TAXID:3708	Quercetin
P03372	-	TAXID:3708	Naringenin
P03372	-	TAXID:175228	P-Coumaric Acid
P03372	-	TAXID:175228	Quercetin
P03372	-	TAXID:175228	Resveratrol
P03372	-	TAXID:175228	Protocatechuic Acid
P03372	-	TAXID:4550	P-Coumaric Acid
P03372	-	TAXID:4550	Vanillic Acid
P03372	-	TAXID:89151	Aucubin
P03372	-	TAXID:89151	Catalpol
P03372	-	TAXID:23211	Narcissin
P03372	-	TAXID:32224	P-Coumaric Acid
P03372	-	TAXID:32224	Protocatechuic Acid
P03372	-	TAXID:4146	P-Coumaric Acid
P03372	-	TAXID:4146	Quercetin
P03372	-	TAXID:4146	Vanillic Acid
P03372	-	TAXID:4146	Caffeic Acid
P03372	-	TAXID:4146	Kaempferol
P03372	-	TAXID:4045	Ferulate
P03372	-	TAXID:4045	P-Coumaric Acid
P03372	-	TAXID:4045	Kaempferol
P03372	-	TAXID:4045	Caffeic Acid
P03372	-	TAXID:4045	Trans-Cinnamic Acid
P03372	-	TAXID:4045	Quercetin
P03372	-	TAXID:3469	Quercetin
P03372	-	TAXID:3469	Kaempferol
P03372	-	TAXID:3469	Phenylbutazone
P03372	-	TAXID:3621	P-Coumaric Acid
P03372	-	TAXID:3621	Resveratrol
P03372	-	TAXID:3621	Protocatechuic Acid
P03372	-	TAXID:3621	Vanillic Acid
P03372	-	TAXID:3621	Caffeic Acid
P03372	-	TAXID:29780	Quercetin
P03372	-	TAXID:29780	Protocatechuic Acid
P03372	-	TAXID:29780	Kaempferol
P03372	-	TAXID:29780	Caffeic Acid
P03372	-	TAXID:3649	Daidzein
P03372	-	TAXID:4006	Vanillic Acid
P03372	-	TAXID:48038	Quercetin
P03372	-	TAXID:48038	Kaempferol
P03372	-	TAXID:32247	Quercetin
P03372	-	TAXID:32247	Kaempferol
P03372	-	TAXID:4682	P-Coumaric Acid
P03372	-	TAXID:4682	Quercetin
P03372	-	TAXID:3818	Resveratrol
P03372	-	TAXID:4681	P-Coumaric Acid
P03372	-	TAXID:4681	Protocatechuic Acid
P03372	-	TAXID:4681	Vanillic Acid
P03372	-	TAXID:4681	Caffeic Acid
P03372	-	TAXID:4681	Kaempferol
P03372	-	TAXID:4681	Quercetin
P03372	-	TAXID:4111	P-Coumaric Acid
P03372	-	TAXID:4111	Caffeic Acid
P03372	-	TAXID:49827	Wogonin
P03372	-	TAXID:49827	Caffeic Acid
P03372	-	TAXID:49827	Dihydrotestosterone
P03372	-	TAXID:49827	Naringenin
P03372	-	TAXID:49827	Nordihydroguaiaretic Acid
P03372	-	TAXID:49827	Sophoraflavanone B
P03372	-	TAXID:3747	P-Coumaric Acid
P03372	-	TAXID:3747	Resveratrol
P03372	-	TAXID:3747	Protocatechuic Acid
P03372	-	TAXID:3747	Vanillic Acid
P03372	-	TAXID:3747	Caffeic Acid
P03372	-	TAXID:3747	Kaempferol
P03372	-	TAXID:3747	Quercetin
P03372	-	TAXID:3747	Naringenin
P03372	-	TAXID:3888	Quercetin
P03372	-	TAXID:3888	Naringenin
P03372	-	TAXID:3888	Kaempferol
P03372	-	TAXID:3888	Daidzein
P03372	-	TAXID:4565	Quercetin
P03372	-	TAXID:4565	Resveratrol
P03372	-	TAXID:4565	Vanillic Acid
P03372	-	TAXID:3983	P-Coumaric Acid
P03372	-	TAXID:3983	Protocatechuic Acid
P03372	-	TAXID:3983	Rutoside
P03372	-	TAXID:4236	Quercetin
P03372	-	TAXID:4236	Ethinyl Estradiol
P03372	-	TAXID:171929	Linoleic
P03372	-	TAXID:151069	Protocatechuic Acid
P03372	-	TAXID:151069	Kaempferol
P03372	-	TAXID:50225	Quercetin
P03372	-	TAXID:3885	Quercetin
P03372	-	TAXID:128608	E-Cinnamaldehyde
P03372	-	TAXID:128608	Vanillic Acid
P03372	-	TAXID:128608	Caffeic Acid
P03372	-	TAXID:3617	Quercetin
P03372	-	TAXID:3617	Vanillic Acid
P03372	-	TAXID:3617	Rutoside
P03372	-	TAXID:180772	P-Coumaric Acid
P03372	-	TAXID:180772	Quercetin
P03372	-	TAXID:180772	Resveratrol
P03372	-	TAXID:180772	Kaempferol
P03372	-	TAXID:13427	Quercetin
P03372	-	TAXID:13427	Vanillic Acid
P03372	-	TAXID:13427	Caffeic Acid
P03372	-	TAXID:4072	Quercetin
P03372	-	TAXID:4222	Quercetin
P03372	-	TAXID:4498	P-Coumaric Acid
P03372	-	TAXID:4498	Vanillic Acid
P03372	-	TAXID:4498	Caffeic Acid
P03372	-	TAXID:4530	Quercetin
P03372	-	TAXID:4530	Linoleic
P03372	-	TAXID:4530	Kaempferol
P03372	-	TAXID:4530	Ferulate
P03372	-	TAXID:120290	Quercetin
P03372	-	TAXID:120290	Naringenin
P03372	-	TAXID:120290	Kaempferol
P03372	-	TAXID:120290	Caffeic Acid
P03372	-	TAXID:74645	Quercetin
P03372	-	TAXID:74645	Kaempferol
P03372	-	TAXID:22663	Quercetin
P03372	-	TAXID:3847	Linoleic
P03372	-	TAXID:3847	Kaempferol
P03372	-	TAXID:3847	Genistein
P03372	-	TAXID:3847	Coumestrol
P03372	-	TAXID:3847	Daidzein
P03372	-	TAXID:3847	Quercetin
P03372	-	TAXID:3847	Naringenin
P03372	-	TAXID:3711	Quercetin
P03372	-	TAXID:3711	Resveratrol
P03372	-	TAXID:3711	Linoleic
P03372	-	TAXID:3711	Kaempferol
P03372	-	TAXID:3711	Caffeic Acid
P03372	-	TAXID:3659	Quercetin
P03372	-	TAXID:3659	Kaempferol
P03372	-	TAXID:3712	P-Coumaric Acid
P03372	-	TAXID:3712	Quercetin
P03372	-	TAXID:3712	Kaempferol
P03372	-	TAXID:3712	Caffeic Acid
P03372	-	TAXID:4113	P-Coumaric Acid
P03372	-	TAXID:4113	Protocatechuic Acid
P03372	-	TAXID:4113	Vanillic Acid
P03372	-	TAXID:4113	Caffeic Acid
P03372	-	TAXID:36610	Quercetin
P03372	-	TAXID:36610	Kaempferol
P03372	-	TAXID:3864	Caffeic Acid
P03372	DB01064	-	-
P03372	DB01097	-	-
P03372	DB01095	-	-
P03372	DB00709	-	-
P03372	DB00258	-	-
P03372	DB00259	-	-
P03372	DB00700	-	-
P03372	DB00701	-	-
P03372	DB00251	-	-
P03372	DB00704	-	-
P03372	DB00257	-	-
P03372	DB00254	-	-
P03372	DB00255	-	-
P03372	DB00313	-	-
P03372	DB00310	-	-
P03372	DB00316	-	-
P03372	DB00091	-	-
P03372	DB00319	-	-
P03372	DB00478	-	-
P03372	DB00570	-	-
P03372	DB00969	-	-
P03372	DB01156	-	-
P03372	DB00184	-	-
P03372	DB01151	-	-
P03372	DB00650	-	-
P03372	DB00788	-	-
P03372	DB00227	-	-
P03372	DB00224	-	-
P03372	DB00222	-	-
P03372	DB00220	-	-
P03372	DB00962	-	-
P03372	DB06710	-	-
P03372	DB00179	-	-
P03372	DB00178	-	-
P03372	DB01075	-	-
P03372	DB01074	-	-
P03372	DB01077	-	-
P03372	DB01076	-	-
P03372	DB00252	-	-
P03372	DB00672	-	-
P03372	DB00674	-	-
P03372	DB00675	-	-
P03372	DB00679	-	-
P03372	DB01275	-	-
P03372	DB00795	-	-
P03372	DB00794	-	-
P03372	DB00793	-	-
P03372	DB00823	-	-
P03372	DB00822	-	-
P03372	DB00415	-	-
P03372	DB00829	-	-
P03372	DB00411	-	-
P03372	DB00412	-	-
P03372	DB00798	-	-
P03372	DB00555	-	-
P03372	DB00554	-	-
P03372	DB00550	-	-
P03372	DB00553	-	-
P03372	DB00890	-	-
P03372	DB00489	-	-
P03372	DB00488	-	-
P03372	DB00483	-	-
P03372	DB00482	-	-
P03372	DB00481	-	-
P03372	DB00487	-	-
P03372	DB00484	-	-
P03372	DB01100	-	-
P03372	DB01103	-	-
P03372	DB01105	-	-
P03372	DB01104	-	-
P03372	DB00214	-	-
P03372	DB00215	-	-
P03372	DB00359	-	-
P03372	DB00357	-	-
P03372	DB00356	-	-
P03372	DB00353	-	-
P03372	DB00350	-	-
P03372	DB01208	-	-
P03372	DB01203	-	-
P03372	DB01200	-	-
P03372	DB01201	-	-
P03372	DB01611	-	-
P03372	DB01204	-	-
P03372	DB01205	-	-
P03372	DB01199	-	-
P03372	DB01193	-	-
P03372	DB01190	-	-
P03372	DB01191	-	-
P03372	DB01197	-	-
P03372	DB00361	-	-
P03372	DB01299	-	-
P03372	DB00915	-	-
P03372	DB00928	-	-
P03372	DB00916	-	-
P03372	DB00911	-	-
P03372	DB00529	-	-
P03372	DB00524	-	-
P03372	DB00525	-	-
P03372	DB00919	-	-
P03372	DB00523	-	-
P03372	DB01035	-	-
P03372	DB01037	-	-
P03372	DB01408	-	-
P03372	DB01030	-	-
P03372	DB01032	-	-
P03372	DB01406	-	-
P03372	DB01407	-	-
P03372	DB01400	-	-
P03372	DB00846	-	-
P03372	DB01039	-	-
P03372	DB00951	-	-
P03372	DB00848	-	-
P03372	DB00285	-	-
P03372	DB00284	-	-
P03372	DB00281	-	-
P03372	DB00283	-	-
P03372	DB00389	-	-
P03372	DB00458	-	-
P03372	DB00328	-	-
P03372	DB00750	-	-
P03372	DB00756	-	-
P03372	DB00755	-	-
P03372	DB00322	-	-
P03372	DB00320	-	-
P03372	DB00758	-	-
P03372	DB00455	-	-
P03372	DB00324	-	-
P03372	DB00457	-	-
P03372	DB04571	-	-
P03372	DB00859	-	-
P03372	DB00857	-	-
P03372	DB00850	-	-
P03372	DB00851	-	-
P03372	DB00780	-	-
P03372	DB00428	-	-
P03372	DB00834	-	-
P03372	DB00783	-	-
P03372	DB00784	-	-
P03372	DB00939	-	-
P03372	DB00831	-	-
P03372	DB00421	-	-
P03372	DB00789	-	-
P03372	DB00935	-	-
P03372	DB00390	-	-
P03372	DB00396	-	-
P03372	DB00395	-	-
P03372	DB00394	-	-
P03372	DB00547	-	-
P03372	DB00544	-	-
P03372	DB00542	-	-
P03372	DB00543	-	-
P03372	DB00540	-	-
P03372	DB01018	-	-
P03372	DB01016	-	-
P03372	DB01015	-	-
P03372	DB01014	-	-
P03372	DB01011	-	-
P03372	DB00549	-	-
P03372	DB00233	-	-
P03372	DB00495	-	-
P03372	DB00490	-	-
P03372	DB00493	-	-
P03372	DB08826	-	-
P03372	DB00498	-	-
P03372	DB00499	-	-
P03372	DB00321	-	-
P03372	DB00945	-	-
P03372	DB03255	-	-
P03372	DB00734	-	-
P03372	DB00731	-	-
P03372	DB00309	-	-
P03372	DB00733	-	-
P03372	DB00305	-	-
P03372	DB00738	-	-
P03372	DB00302	-	-
P03372	DB01606	-	-
P03372	DB01167	-	-
P03372	DB01166	-	-
P03372	DB01165	-	-
P03372	DB01162	-	-
P03372	DB00426	-	-
P03372	DB01229	-	-
P03372	DB00959	-	-
P03372	DB01287	-	-
P03372	DB01186	-	-
P03372	DB01068	-	-
P03372	DB01069	-	-
P03372	DB00649	-	-
P03372	DB00648	-	-
P03372	DB00162	-	-
P03372	DB00163	-	-
P03372	DB01062	-	-
P03372	DB01060	-	-
P03372	DB01061	-	-
P03372	DB00641	-	-
P03372	DB01067	-	-
P03372	DB00643	-	-
P03372	DB01065	-	-
P03372	DB01357	-	-
P03372	DB00749	-	-
P03372	DB00298	-	-
P03372	DB00744	-	-
P03372	DB00297	-	-
P03372	DB00740	-	-
P03372	DB00741	-	-
P03372	DB00742	-	-
P03372	DB00291	-	-
P03372	DB00465	-	-
P03372	DB00450	-	-
P03372	DB00467	-	-
P03372	DB00461	-	-
P03372	DB00462	-	-
P03372	DB00469	-	-
P03372	DB00452	-	-
P03372	DB00196	-	-
P03372	DB00190	-	-
P03372	DB00193	-	-
P03372	DB00199	-	-
P03372	DB00861	-	-
P03372	DB00860	-	-
P03372	DB00863	-	-
P03372	DB00325	-	-
P03372	DB00864	-	-
P03372	DB01112	-	-
P03372	DB01113	-	-
P03372	DB01110	-	-
P03372	DB01114	-	-
P03372	DB01115	-	-
P03372	DB00177	-	-
P03372	DB01118	-	-
P03372	DB01119	-	-
P03372	DB00175	-	-
P03372	DB00263	-	-
P03372	DB00262	-	-
P03372	DB00266	-	-
P03372	DB00265	-	-
P03372	DB00264	-	-
P03372	DB00269	-	-
P03372	DB00343	-	-
P03372	DB00347	-	-
P03372	DB00423	-	-
P03372	DB00635	-	-
P03372	DB00636	-	-
P03372	DB00637	-	-
P03372	DB00630	-	-
P03372	DB01233	-	-
P03372	DB01232	-	-
P03372	DB01231	-	-
P03372	DB01235	-	-
P03372	DB01234	-	-
P03372	DB00518	-	-
P03372	DB00904	-	-
P03372	DB01595	-	-
P03372	DB00903	-	-
P03372	DB00513	-	-
P03372	DB00512	-	-
P03372	DB00515	-	-
P03372	DB00514	-	-
P03372	DB01026	-	-
P03372	DB01438	-	-
P03372	DB00122	-	-
P03372	DB01023	-	-
P03372	DB00126	-	-
P03372	DB01021	-	-
P03372	DB00681	-	-
P03372	DB00682	-	-
P03372	DB01435	-	-
P03372	DB00684	-	-
P03372	DB01436	-	-
P03372	DB00999	-	-
P03372	DB00995	-	-
P03372	DB00994	-	-
P03372	DB00997	-	-
P03372	DB00996	-	-
P03372	DB00991	-	-
P03372	DB00437	-	-
P03372	DB04552	-	-
P03372	DB04573	-	-
P03372	DB00836	-	-
P03372	DB00153	-	-
P03372	DB01092	-	-
P03372	DB01091	-	-
P03372	DB00656	-	-
P03372	DB00655	-	-
P03372	DB01099	-	-
P03372	DB00651	-	-
P03372	DB01253	-	-
P03372	DB00166	-	-
P03372	DB00393	-	-
P03372	DB00420	-	-
P03372	DB01380	-	-
P03372	DB00391	-	-
P03372	DB00384	-	-
P03372	DB00841	-	-
P03372	DB00934	-	-
P03372	DB00381	-	-
P03372	DB00382	-	-
P03372	DB00844	-	-
P03372	DB00920	-	-
P03372	DB00433	-	-
P03372	DB00431	-	-
P03372	DB00925	-	-
P03372	DB00434	-	-
P03372	DB00424	-	-
P03372	DB01008	-	-
P03372	DB01009	-	-
P03372	DB00531	-	-
P03372	DB00537	-	-
P03372	DB01001	-	-
P03372	DB01002	-	-
P03372	DB01003	-	-
P03372	DB01005	-	-
P03372	DB01006	-	-
P03372	DB00342	-	-
P03372	DB00541	-	-
P03372	DB00279	-	-
P03372	DB00274	-	-
P03372	DB00418	-	-
P03372	DB00277	-	-
P03372	DB00271	-	-
P03372	DB00376	-	-
P03372	DB00373	-	-
P03372	DB00379	-	-
P03372	DB06150	-	-
P03372	DB01171	-	-
P03372	DB01172	-	-
P03372	DB01173	-	-
P03372	DB01174	-	-
P03372	DB01175	-	-
P03372	DB01176	-	-
P03372	DB01177	-	-
P03372	DB01179	-	-
P03372	DB00970	-	-
P03372	DB00977	-	-
P03372	DB00975	-	-
P03372	DB00502	-	-
P03372	DB00503	-	-
P03372	DB00500	-	-
P03372	DB00978	-	-
P03372	DB01581	-	-
P03372	DB00507	-	-
P03372	DB01582	-	-
P03372	DB01053	-	-
P03372	DB00698	-	-
P03372	DB01050	-	-
P03372	DB01056	-	-
P03372	DB01055	-	-
P03372	DB01054	-	-
P03372	DB00692	-	-
P03372	DB01351	-	-
P03372	DB01420	-	-
P03372	DB01058	-	-
P03372	DB00696	-	-
P03372	DB01427	-	-
P03372	DB00694	-	-
P03372	DB00695	-	-
P03372	DB00987	-	-
P03372	DB00982	-	-
P03372	DB00981	-	-
P03372	DB00591	-	-
P03372	DB00590	-	-
P03372	DB00593	-	-
P03372	DB00595	-	-
P03372	DB00598	-	-
P03372	DB08905	-	-
P03372	DB00779	-	-
P03372	DB00778	-	-
P03372	DB00809	-	-
P03372	DB00808	-	-
P03372	DB00807	-	-
P03372	DB00806	-	-
P03372	DB00773	-	-
P03372	DB00804	-	-
P03372	DB00776	-	-
P03372	DB00477	-	-
P03372	DB00472	-	-
P03372	DB00471	-	-
P03372	DB00577	-	-
P03372	DB00576	-	-
P03372	DB00575	-	-
P03372	DB00573	-	-
P03372	DB00572	-	-
P03372	DB00571	-	-
P03372	DB00479	-	-
P03372	DB00186	-	-
P03372	DB00187	-	-
P03372	DB00169	-	-
P03372	DB00180	-	-
P03372	DB00181	-	-
P03372	DB00878	-	-
P03372	DB00871	-	-
P03372	DB00877	-	-
P03372	DB00874	-	-
P03372	DB01128	-	-
P03372	DB01121	-	-
P03372	DB01120	-	-
P03372	DB01127	-	-
P03372	DB01125	-	-
P03372	DB00330	-	-
P03372	DB00238	-	-
P03372	DB00239	-	-
P03372	DB00335	-	-
P03372	DB01087	-	-
P03372	DB00235	-	-
P03372	DB00600	-	-
P03372	DB00602	-	-
P03372	DB00604	-	-
P03372	DB01224	-	-
P03372	DB01221	-	-
P03372	DB01222	-	-
P03372	DB01223	-	-
P03372	DB00898	-	-
P03372	DB00950	-	-
P03372	DB00936	-	-
P03372	DB01339	-	-
P03372	DB00730	-	-
P03372	DB01148	-	-
P03372	DB01147	-	-
P03372	DB01143	-	-
P03372	DB01142	-	-
P03372	DB01082	-	-
P03372	DB00839	-	-
P03372	DB01086	-	-
P03372	DB00145	-	-
P03372	DB00623	-	-
P03372	DB00620	-	-
P03372	DB00627	-	-
P03372	DB00624	-	-
P03372	DB01242	-	-
P03372	DB01241	-	-
P03372	DB01248	-	-
P03372	DB00120	-	-
P03372	DB01428	-	-
P03372	DB01394	-	-
P03372	DB01396	-	-
P03372	DB06148	-	-
P03372	DB01392	-	-
P03372	DB01393	-	-
P03372	DB06147	-	-
P03372	DB01399	-	-
P03372	DB00818	-	-
P03372	DB00819	-	-
P03372	DB00762	-	-
P03372	DB00763	-	-
P03372	DB00812	-	-
P03372	DB00814	-	-
P03372	DB00765	-	-
P03372	DB00568	-	-
P03372	DB00401	-	-
P03372	DB00400	-	-
P03372	DB00406	-	-
P03372	DB00404	-	-
P03372	DB00561	-	-
P03372	DB00563	-	-
P03372	DB00564	-	-
P03372	DB01059	-	-
P03372	DB04841	-	-
P03372	DB00567	-	-
P03372	DB00759	-	-
P03372	DB01426	-	-
P03372	DB00884	-	-
P03372	DB00968	-	-
P03372	DB00882	-	-
P03372	DB00881	-	-
P03372	DB00967	-	-
P03372	DB00960	-	-
P03372	DB00961	-	-
P03372	DB00889	-	-
P03372	DB00963	-	-
P03372	DB06729	-	-
P03372	DB00249	-	-
P03372	DB00717	-	-
P03372	DB00715	-	-
P03372	DB00242	-	-
P03372	DB00245	-	-
P03372	DB00712	-	-
P03372	DB00247	-	-
P03372	DB00367	-	-
P03372	DB00365	-	-
P03372	DB00363	-	-
P03372	DB00688	-	-
P03372	DB01024	-	-
P03372	DB03166	-	-
P03372	DB00614	-	-
P03372	DB00615	-	-
P03372	DB01211	-	-
P03372	DB01210	-	-
P03372	DB01213	-	-
P03372	DB00619	-	-
P03372	DB01217	-	-
P03372	DB01216	-	-
P03372	DB06698	-	-
P03372	DB01188	-	-
P03372	DB01627	-	-
P03372	DB01181	-	-
P03372	DB06691	-	-
P03372	DB01183	-	-
P03372	DB01182	-	-
P03372	DB01184	-	-
P03372	DB06697	-	-
P03372	DB00685	-	-
P03372	DB00811	-	-
P03372	DB01029	-	-
P03372	DB00760	-	-
P03372	DB08807	-	-
P03372	DB04838	-	-
P03372	DB01599	-	-
P03372	DB01044	-	-
P03372	DB01045	-	-
P03372	DB00104	-	-
P03372	DB01047	-	-
P03372	DB01041	-	-
P03372	DB01042	-	-
P03372	DB00661	-	-
P03372	DB00669	-	-
P03372	DB00668	-	-
P03372	DB00583	-	-
P03372	DB00586	-	-
P03372	DB00584	-	-
P03372	DB00585	-	-
P03372	DB08797	-	-
P03372	DB00589	-	-
P03372	DB00339	-	-
P03372	DB00724	-	-
P03372	DB00725	-	-
P03372	DB00722	-	-
P03372	DB00721	-	-
P03372	DB00331	-	-
P03372	DB00446	-	-
P03372	DB00445	-	-
P03372	DB00443	-	-
P03372	DB00334	-	-
P03372	DB00441	-	-
P03372	DB00336	-	-
P03372	DB01168	-	-
P03372	DB01136	-	-
P03372	DB01137	-	-
P03372	DB01132	-	-
P03372	DB01206	-	-
P03372	DB00205	-	-
P03372	DB00207	-	-
P03372	DB00206	-	-
P03372	DB00201	-	-
P03372	DB00202	-	-
P03372	DB00208	-	-
P03372	DB06770	-	-
P35367	DB01064	-	-
P35367	DB01097	-	-
P35367	DB00153	-	-
P35367	DB00709	-	-
P35367	DB00258	-	-
P35367	DB00259	-	-
P35367	DB00252	-	-
P35367	DB00701	-	-
P35367	DB00251	-	-
P35367	DB00704	-	-
P35367	DB00257	-	-
P35367	DB00706	-	-
P35367	DB00255	-	-
P35367	DB00313	-	-
P35367	DB00310	-	-
P35367	DB00316	-	-
P35367	DB00315	-	-
P35367	DB00091	-	-
P35367	DB00319	-	-
P35367	DB00478	-	-
P35367	DB00570	-	-
P35367	DB00882	-	-
P35367	DB01156	-	-
P35367	DB01151	-	-
P35367	DB00650	-	-
P35367	DB00227	-	-
P35367	DB00224	-	-
P35367	DB00222	-	-
P35367	DB00220	-	-
P35367	DB00962	-	-
P35367	DB06710	-	-
P35367	DB03255	-	-
P35367	DB00178	-	-
P35367	DB01075	-	-
P35367	DB01074	-	-
P35367	DB01077	-	-
P35367	DB01076	-	-
P35367	DB00672	-	-
P35367	DB00674	-	-
P35367	DB00675	-	-
P35367	DB00679	-	-
P35367	DB01275	-	-
P35367	DB00254	-	-
P35367	DB00795	-	-
P35367	DB00794	-	-
P35367	DB00793	-	-
P35367	DB00792	-	-
P35367	DB00823	-	-
P35367	DB00822	-	-
P35367	DB00415	-	-
P35367	DB00829	-	-
P35367	DB00411	-	-
P35367	DB00412	-	-
P35367	DB00798	-	-
P35367	DB00555	-	-
P35367	DB00554	-	-
P35367	DB00550	-	-
P35367	DB00553	-	-
P35367	DB00959	-	-
P35367	DB00489	-	-
P35367	DB00488	-	-
P35367	DB00898	-	-
P35367	DB00950	-	-
P35367	DB00481	-	-
P35367	DB00487	-	-
P35367	DB00484	-	-
P35367	DB01103	-	-
P35367	DB01105	-	-
P35367	DB01104	-	-
P35367	DB00214	-	-
P35367	DB00215	-	-
P35367	DB00359	-	-
P35367	DB00357	-	-
P35367	DB00356	-	-
P35367	DB00353	-	-
P35367	DB00350	-	-
P35367	DB01208	-	-
P35367	DB01203	-	-
P35367	DB01200	-	-
P35367	DB01201	-	-
P35367	DB01611	-	-
P35367	DB01204	-	-
P35367	DB01205	-	-
P35367	DB01199	-	-
P35367	DB01193	-	-
P35367	DB01190	-	-
P35367	DB01191	-	-
P35367	DB01197	-	-
P35367	DB01299	-	-
P35367	DB00915	-	-
P35367	DB00384	-	-
P35367	DB00916	-	-
P35367	DB00911	-	-
P35367	DB00529	-	-
P35367	DB00524	-	-
P35367	DB00525	-	-
P35367	DB00919	-	-
P35367	DB00523	-	-
P35367	DB01035	-	-
P35367	DB01037	-	-
P35367	DB00387	-	-
P35367	DB01408	-	-
P35367	DB01030	-	-
P35367	DB01032	-	-
P35367	DB01406	-	-
P35367	DB01407	-	-
P35367	DB01400	-	-
P35367	DB00846	-	-
P35367	DB01039	-	-
P35367	DB00951	-	-
P35367	DB00421	-	-
P35367	DB00285	-	-
P35367	DB00284	-	-
P35367	DB00281	-	-
P35367	DB00283	-	-
P35367	DB00389	-	-
P35367	DB00328	-	-
P35367	DB00750	-	-
P35367	DB00756	-	-
P35367	DB00755	-	-
P35367	DB00322	-	-
P35367	DB00320	-	-
P35367	DB00758	-	-
P35367	DB00455	-	-
P35367	DB00324	-	-
P35367	DB00457	-	-
P35367	DB04571	-	-
P35367	DB00859	-	-
P35367	DB00857	-	-
P35367	DB00850	-	-
P35367	DB00851	-	-
P35367	DB00780	-	-
P35367	DB00428	-	-
P35367	DB00834	-	-
P35367	DB00783	-	-
P35367	DB00784	-	-
P35367	DB00939	-	-
P35367	DB00831	-	-
P35367	DB00393	-	-
P35367	DB00789	-	-
P35367	DB00935	-	-
P35367	DB00934	-	-
P35367	DB00424	-	-
P35367	DB00427	-	-
P35367	DB00394	-	-
P35367	DB00547	-	-
P35367	DB00544	-	-
P35367	DB00542	-	-
P35367	DB00543	-	-
P35367	DB00540	-	-
P35367	DB01018	-	-
P35367	DB01016	-	-
P35367	DB01015	-	-
P35367	DB01014	-	-
P35367	DB01011	-	-
P35367	DB00549	-	-
P35367	DB00233	-	-
P35367	DB00495	-	-
P35367	DB00490	-	-
P35367	DB00493	-	-
P35367	DB08826	-	-
P35367	DB00498	-	-
P35367	DB00499	-	-
P35367	DB00321	-	-
P35367	DB00945	-	-
P35367	DB00734	-	-
P35367	DB00731	-	-
P35367	DB00309	-	-
P35367	DB00733	-	-
P35367	DB00305	-	-
P35367	DB00738	-	-
P35367	DB00302	-	-
P35367	DB01606	-	-
P35367	DB01167	-	-
P35367	DB01166	-	-
P35367	DB01165	-	-
P35367	DB01162	-	-
P35367	DB00426	-	-
P35367	DB01168	-	-
P35367	DB01287	-	-
P35367	DB06697	-	-
P35367	DB01068	-	-
P35367	DB01069	-	-
P35367	DB00649	-	-
P35367	DB00648	-	-
P35367	DB00163	-	-
P35367	DB01062	-	-
P35367	DB01060	-	-
P35367	DB01061	-	-
P35367	DB00641	-	-
P35367	DB01067	-	-
P35367	DB00643	-	-
P35367	DB01065	-	-
P35367	DB01357	-	-
P35367	DB00749	-	-
P35367	DB00298	-	-
P35367	DB00744	-	-
P35367	DB00297	-	-
P35367	DB00740	-	-
P35367	DB00741	-	-
P35367	DB00742	-	-
P35367	DB00291	-	-
P35367	DB00465	-	-
P35367	DB00450	-	-
P35367	DB00467	-	-
P35367	DB00461	-	-
P35367	DB00462	-	-
P35367	DB00469	-	-
P35367	DB00452	-	-
P35367	DB00196	-	-
P35367	DB00190	-	-
P35367	DB00193	-	-
P35367	DB00199	-	-
P35367	DB00861	-	-
P35367	DB00860	-	-
P35367	DB00863	-	-
P35367	DB00325	-	-
P35367	DB00864	-	-
P35367	DB01113	-	-
P35367	DB01110	-	-
P35367	DB01114	-	-
P35367	DB01115	-	-
P35367	DB00177	-	-
P35367	DB01118	-	-
P35367	DB01119	-	-
P35367	DB00175	-	-
P35367	DB00263	-	-
P35367	DB00262	-	-
P35367	DB00266	-	-
P35367	DB00265	-	-
P35367	DB00264	-	-
P35367	DB00341	-	-
P35367	DB00342	-	-
P35367	DB00343	-	-
P35367	DB00347	-	-
P35367	DB00635	-	-
P35367	DB00636	-	-
P35367	DB00637	-	-
P35367	DB00630	-	-
P35367	DB01233	-	-
P35367	DB01232	-	-
P35367	DB01231	-	-
P35367	DB01235	-	-
P35367	DB01234	-	-
P35367	DB01239	-	-
P35367	DB00104	-	-
P35367	DB00518	-	-
P35367	DB00904	-	-
P35367	DB01047	-	-
P35367	DB00903	-	-
P35367	DB00513	-	-
P35367	DB00512	-	-
P35367	DB00515	-	-
P35367	DB00514	-	-
P35367	DB01026	-	-
P35367	DB00688	-	-
P35367	DB00122	-	-
P35367	DB01023	-	-
P35367	DB00126	-	-
P35367	DB01021	-	-
P35367	DB00681	-	-
P35367	DB00682	-	-
P35367	DB01435	-	-
P35367	DB00684	-	-
P35367	DB01436	-	-
P35367	DB00999	-	-
P35367	DB00995	-	-
P35367	DB00994	-	-
P35367	DB00997	-	-
P35367	DB00996	-	-
P35367	DB00991	-	-
P35367	DB04552	-	-
P35367	DB04573	-	-
P35367	DB00836	-	-
P35367	DB01095	-	-
P35367	DB01092	-	-
P35367	DB01091	-	-
P35367	DB00656	-	-
P35367	DB00655	-	-
P35367	DB01099	-	-
P35367	DB00651	-	-
P35367	DB01253	-	-
P35367	DB00166	-	-
P35367	DB00788	-	-
P35367	DB00420	-	-
P35367	DB01380	-	-
P35367	DB00423	-	-
P35367	DB00928	-	-
P35367	DB00841	-	-
P35367	DB00390	-	-
P35367	DB00381	-	-
P35367	DB00382	-	-
P35367	DB00844	-	-
P35367	DB00920	-	-
P35367	DB00433	-	-
P35367	DB00848	-	-
P35367	DB00437	-	-
P35367	DB00434	-	-
P35367	DB00396	-	-
P35367	DB01008	-	-
P35367	DB01009	-	-
P35367	DB00531	-	-
P35367	DB00537	-	-
P35367	DB01001	-	-
P35367	DB01002	-	-
P35367	DB01003	-	-
P35367	DB01005	-	-
P35367	DB01006	-	-
P35367	DB00541	-	-
P35367	DB00279	-	-
P35367	DB00274	-	-
P35367	DB00418	-	-
P35367	DB00277	-	-
P35367	DB00271	-	-
P35367	DB00376	-	-
P35367	DB00370	-	-
P35367	DB00373	-	-
P35367	DB00379	-	-
P35367	DB06150	-	-
P35367	DB01171	-	-
P35367	DB01172	-	-
P35367	DB01173	-	-
P35367	DB01174	-	-
P35367	DB01175	-	-
P35367	DB01176	-	-
P35367	DB01177	-	-
P35367	DB01179	-	-
P35367	DB00972	-	-
P35367	DB00970	-	-
P35367	DB00977	-	-
P35367	DB00975	-	-
P35367	DB00502	-	-
P35367	DB00503	-	-
P35367	DB00500	-	-
P35367	DB00978	-	-
P35367	DB01581	-	-
P35367	DB01582	-	-
P35367	DB01053	-	-
P35367	DB00698	-	-
P35367	DB01050	-	-
P35367	DB01056	-	-
P35367	DB01055	-	-
P35367	DB01054	-	-
P35367	DB00692	-	-
P35367	DB01351	-	-
P35367	DB01059	-	-
P35367	DB01058	-	-
P35367	DB00696	-	-
P35367	DB01427	-	-
P35367	DB00694	-	-
P35367	DB00695	-	-
P35367	DB00987	-	-
P35367	DB00982	-	-
P35367	DB00981	-	-
P35367	DB00591	-	-
P35367	DB00590	-	-
P35367	DB00593	-	-
P35367	DB00595	-	-
P35367	DB00598	-	-
P35367	DB00778	-	-
P35367	DB00809	-	-
P35367	DB00808	-	-
P35367	DB00807	-	-
P35367	DB00806	-	-
P35367	DB00773	-	-
P35367	DB00804	-	-
P35367	DB00776	-	-
P35367	DB00477	-	-
P35367	DB00472	-	-
P35367	DB00471	-	-
P35367	DB00577	-	-
P35367	DB00576	-	-
P35367	DB00575	-	-
P35367	DB00573	-	-
P35367	DB00572	-	-
P35367	DB00571	-	-
P35367	DB00479	-	-
P35367	DB00186	-	-
P35367	DB00187	-	-
P35367	DB00184	-	-
P35367	DB00180	-	-
P35367	DB00181	-	-
P35367	DB00871	-	-
P35367	DB00877	-	-
P35367	DB00874	-	-
P35367	DB01128	-	-
P35367	DB01121	-	-
P35367	DB01120	-	-
P35367	DB01127	-	-
P35367	DB01125	-	-
P35367	DB00330	-	-
P35367	DB00238	-	-
P35367	DB00239	-	-
P35367	DB00443	-	-
P35367	DB01087	-	-
P35367	DB00235	-	-
P35367	DB00600	-	-
P35367	DB00602	-	-
P35367	DB00604	-	-
P35367	DB01224	-	-
P35367	DB01221	-	-
P35367	DB01222	-	-
P35367	DB01223	-	-
P35367	DB00483	-	-
P35367	DB00482	-	-
P35367	DB00936	-	-
P35367	DB01339	-	-
P35367	DB00730	-	-
P35367	DB00391	-	-
P35367	DB01148	-	-
P35367	DB01147	-	-
P35367	DB01143	-	-
P35367	DB01142	-	-
P35367	DB01082	-	-
P35367	DB00839	-	-
P35367	DB01086	-	-
P35367	DB00145	-	-
P35367	DB00623	-	-
P35367	DB00620	-	-
P35367	DB00627	-	-
P35367	DB00624	-	-
P35367	DB01242	-	-
P35367	DB01241	-	-
P35367	DB01248	-	-
P35367	DB01394	-	-
P35367	DB01396	-	-
P35367	DB06148	-	-
P35367	DB00169	-	-
P35367	DB01392	-	-
P35367	DB01393	-	-
P35367	DB06144	-	-
P35367	DB06147	-	-
P35367	DB01399	-	-
P35367	DB00818	-	-
P35367	DB00819	-	-
P35367	DB00762	-	-
P35367	DB00763	-	-
P35367	DB00812	-	-
P35367	DB00813	-	-
P35367	DB00814	-	-
P35367	DB00765	-	-
P35367	DB00568	-	-
P35367	DB00401	-	-
P35367	DB00400	-	-
P35367	DB00406	-	-
P35367	DB00404	-	-
P35367	DB00561	-	-
P35367	DB00563	-	-
P35367	DB00564	-	-
P35367	DB04841	-	-
P35367	DB00567	-	-
P35367	DB00759	-	-
P35367	DB01426	-	-
P35367	DB00884	-	-
P35367	DB00968	-	-
P35367	DB00969	-	-
P35367	DB00881	-	-
P35367	DB00967	-	-
P35367	DB00960	-	-
P35367	DB00961	-	-
P35367	DB00889	-	-
P35367	DB00963	-	-
P35367	DB06729	-	-
P35367	DB00249	-	-
P35367	DB00717	-	-
P35367	DB00715	-	-
P35367	DB00242	-	-
P35367	DB00245	-	-
P35367	DB00712	-	-
P35367	DB00247	-	-
P35367	DB00246	-	-
P35367	DB00367	-	-
P35367	DB00365	-	-
P35367	DB00363	-	-
P35367	DB00361	-	-
P35367	DB01024	-	-
P35367	DB03166	-	-
P35367	DB00614	-	-
P35367	DB00615	-	-
P35367	DB01211	-	-
P35367	DB01210	-	-
P35367	DB01213	-	-
P35367	DB00619	-	-
P35367	DB01217	-	-
P35367	DB01216	-	-
P35367	DB06698	-	-
P35367	DB01188	-	-
P35367	DB01627	-	-
P35367	DB01181	-	-
P35367	DB06691	-	-
P35367	DB01183	-	-
P35367	DB01182	-	-
P35367	DB01184	-	-
P35367	DB01186	-	-
P35367	DB00685	-	-
P35367	DB00810	-	-
P35367	DB00811	-	-
P35367	DB01029	-	-
P35367	DB00760	-	-
P35367	DB08807	-	-
P35367	DB04838	-	-
P35367	DB08801	-	-
P35367	DB01599	-	-
P35367	DB01044	-	-
P35367	DB01045	-	-
[truncated: 2,820 more rows]

## Sheet: Neurological
Protein	Drug name	Plant source	Plant compound
P00918	-	TAXID:65948	Caffeic Acid
P00918	-	TAXID:29760	(+)-Catechin
P00918	-	TAXID:29760	Quercetin
P00918	-	TAXID:29760	Resveratrol
P00918	-	TAXID:29760	Caffeic Acid
P00918	-	TAXID:74900	P-Coumaric Acid
P00918	-	TAXID:74900	Quercetin
P00918	-	TAXID:74900	Protocatechuic Acid
P00918	-	TAXID:74900	Caffeic Acid
P00918	-	TAXID:74900	P-Hydroxybenzoic Acid
P00918	-	TAXID:51240	Protocatechuic Acid
P00918	-	TAXID:51240	Caffeic Acid
P00918	-	TAXID:51240	P-Hydroxybenzoic Acid
P00918	-	TAXID:58860	(+)-Catechin
P00918	-	TAXID:4081	Resveratrol
P00918	-	TAXID:4081	Serotonin
P00918	-	TAXID:4081	Spermine
P00918	-	TAXID:4081	Spermidine
P00918	-	TAXID:4081	P-Hydroxybenzoic Acid
P00918	-	TAXID:4081	Quercetin
P00918	-	TAXID:4222	Serotonin
P00918	-	TAXID:4222	Ferric Thiocyanate
P00918	-	TAXID:4222	Quercetin
P00918	-	TAXID:4577	P-Coumaric Acid
P00918	-	TAXID:4577	Spermine
P00918	-	TAXID:4577	Caffeic Acid
P00918	-	TAXID:4577	Phosphoserine
P00918	-	TAXID:4577	Quercetin
P00918	-	TAXID:4577	Tyrosine
P00918	-	TAXID:4577	Tryptophan
P00918	-	TAXID:13894	P-Hydroxybenzoic Acid
P00918	-	TAXID:3983	P-Coumaric Acid
P00918	-	TAXID:3983	Protocatechuic Acid
P00918	-	TAXID:36610	Quercetin
P00918	-	TAXID:4682	P-Coumaric Acid
P00918	-	TAXID:4682	Quercetin
P00918	-	TAXID:4682	Tryptophan
P00918	-	TAXID:4182	Butylated Hydroxytoluene
P00918	-	TAXID:3712	P-Coumaric Acid
P00918	-	TAXID:3712	Quercetin
P00918	-	TAXID:3712	Tannic Acid
P00918	-	TAXID:3712	Caffeic Acid
P00918	-	TAXID:114280	P-Coumaric Acid
P00918	-	TAXID:114280	Quercetin
P00918	-	TAXID:114280	Protocatechuic Acid
P00918	-	TAXID:114280	Caffeic Acid
P00918	-	TAXID:114280	P-Hydroxybenzoic Acid
P00918	-	TAXID:4045	Tyrosol
P00918	-	TAXID:4045	Calcium Propionate
P00918	-	TAXID:4045	Ferulate
P00918	-	TAXID:4045	P-Coumaric Acid
P00918	-	TAXID:4045	Caffeic Acid
P00918	-	TAXID:4045	Quercetin
P00918	-	TAXID:4045	Tryptophan
P00918	-	TAXID:4679	Quercetin
P00918	-	TAXID:4679	Tyrosine
P00918	-	TAXID:4679	Protocatechuic Acid
P00918	-	TAXID:4679	Tryptophan
P00918	-	TAXID:4047	Quercetin
P00918	-	TAXID:4120	Caffeic Acid
P00918	-	TAXID:4530	Guaiacol
P00918	-	TAXID:4530	Ferulate
P00918	-	TAXID:4530	Vinegar
P00918	-	TAXID:4530	P-Hydroxybenzoic Acid
P00918	-	TAXID:4530	Quercetin
P00918	-	TAXID:4530	Histidine
P00918	-	TAXID:4530	Tyrosine
P00918	-	TAXID:41241	(+)-Catechin
P00918	-	TAXID:171929	Tea Polyphenol
P00918	-	TAXID:171929	Guaiacol
P00918	-	TAXID:171929	Isovaleric Acid
P00918	-	TAXID:171929	Tannic Acid
P00918	-	TAXID:3641	(+)-Catechin
P00918	-	TAXID:175228	P-Coumaric Acid
P00918	-	TAXID:175228	Resveratrol
P00918	-	TAXID:175228	Protocatechuic Acid
P00918	-	TAXID:175228	Flavon-3-Ol
P00918	-	TAXID:175228	P-Hydroxybenzoic Acid
P00918	-	TAXID:175228	Quercetin
P00918	-	TAXID:4550	P-Coumaric Acid
P00918	-	TAXID:4550	Vinegar
P00918	-	TAXID:89151	Vinegar
P00918	-	TAXID:89151	Tannic Acid
P00918	-	TAXID:32224	P-Coumaric Acid
P00918	-	TAXID:32224	Tea Polyphenol
P00918	-	TAXID:32224	Protocatechuic Acid
P00918	-	TAXID:32224	O-Coumaric Acid
P00918	-	TAXID:32224	(+)-Catechin
P00918	-	TAXID:4146	P-Coumaric Acid
P00918	-	TAXID:4146	Quercetin
P00918	-	TAXID:4146	Tyrosol
P00918	-	TAXID:4146	Caffeic Acid
P00918	-	TAXID:13731	Guaiacol
P00918	-	TAXID:3469	Quercetin
P00918	-	TAXID:3469	Tyrosine
P00918	-	TAXID:3864	(+)-Catechin
P00918	-	TAXID:3864	Caffeic Acid
P00918	-	TAXID:3864	P-Hydroxybenzoic Acid
P00918	-	TAXID:3621	P-Coumaric Acid
P00918	-	TAXID:3621	Resveratrol
P00918	-	TAXID:3621	Protocatechuic Acid
P00918	-	TAXID:3621	Caffeic Acid
P00918	-	TAXID:3621	P-Hydroxybenzoic Acid
P00918	-	TAXID:29780	Protocatechuic Acid
P00918	-	TAXID:29780	Caffeic Acid
P00918	-	TAXID:29780	(+)-Catechin
P00918	-	TAXID:29780	Ellagic Acid
P00918	-	TAXID:29780	Quercetin
P00918	-	TAXID:29780	Tannic Acid
P00918	-	TAXID:3708	4-Hydroxybenzoate
P00918	-	TAXID:3708	Ferulate
P00918	-	TAXID:3708	Caffeic Acid
P00918	-	TAXID:3708	P-Hydroxybenzoic Acid
P00918	-	TAXID:3708	Quercetin
P00918	-	TAXID:3708	Tryptophan
P00918	-	TAXID:3435	(+)-Catechin
P00918	-	TAXID:3435	Spermine
P00918	-	TAXID:120290	Caffeic Acid
P00918	-	TAXID:120290	(+)-Catechin
P00918	-	TAXID:120290	Ellagic Acid
P00918	-	TAXID:120290	Quercetin
P00918	-	TAXID:120290	Isovaleric Acid
P00918	-	TAXID:120290	Foscarnet
P00918	-	TAXID:48038	Quercetin
P00918	-	TAXID:32247	Ellagic Acid
P00918	-	TAXID:32247	Quercetin
P00918	-	TAXID:32247	Vinegar
P00918	-	TAXID:157791	Vinegar
P00918	-	TAXID:157791	Tryptophan
P00918	-	TAXID:157791	Tannic Acid
P00918	-	TAXID:3818	3,5-Dihydroxybenzoic Acid
P00918	-	TAXID:3818	Resveratrol
P00918	-	TAXID:49827	Caffeic Acid
P00918	-	TAXID:4681	P-Coumaric Acid
P00918	-	TAXID:4681	Protocatechuic Acid
P00918	-	TAXID:4681	Caffeic Acid
P00918	-	TAXID:4681	P-Hydroxybenzoic Acid
P00918	-	TAXID:4681	Quercetin
P00918	-	TAXID:4681	Malonic Acid
P00918	-	TAXID:4513	(+)-Catechin
P00918	-	TAXID:4513	Syringic Acid
P00918	-	TAXID:4513	Caffeic Acid
P00918	-	TAXID:35925	(+)-Catechin
P00918	-	TAXID:35925	Quercetin
P00918	-	TAXID:35925	Vinegar
P00918	-	TAXID:35925	Caffeic Acid
P00918	-	TAXID:3747	Guaiacol
P00918	-	TAXID:3747	P-Coumaric Acid
P00918	-	TAXID:3747	Resveratrol
P00918	-	TAXID:3747	Protocatechuic Acid
P00918	-	TAXID:3747	Caffeic Acid
P00918	-	TAXID:3747	(+)-Catechin
P00918	-	TAXID:3747	Vinegar
P00918	-	TAXID:3747	P-Hydroxybenzoic Acid
P00918	-	TAXID:3747	Ellagic Acid
P00918	-	TAXID:3747	Quercetin
P00918	-	TAXID:3747	Tyrosine
P00918	-	TAXID:3562	Histidine
P00918	-	TAXID:3562	Tryptophan
P00918	-	TAXID:3562	Phosphoserine
P00918	-	TAXID:3888	Carbamoyl Phosphate
P00918	-	TAXID:3888	Histidine
P00918	-	TAXID:3888	Quercetin
P00918	-	TAXID:3888	Tyrosine
P00918	-	TAXID:3888	Pyruvic Acid
P00918	-	TAXID:3888	Tryptophan
P00918	-	TAXID:4565	Quercetin
P00918	-	TAXID:4565	Resveratrol
P00918	-	TAXID:4565	Guaiacol
P00918	-	TAXID:4565	Sodium Diethyldithiocarbamate
P00918	-	TAXID:94328	Serotonin
P00918	-	TAXID:94328	Ferric Thiocyanate
P00918	-	TAXID:4236	Pyrocatechol
P00918	-	TAXID:4236	Vinegar
P00918	-	TAXID:4236	P-Hydroxybenzoic Acid
P00918	-	TAXID:4236	Quercetin
P00918	-	TAXID:151069	Ellagic Acid
P00918	-	TAXID:151069	(+)-Catechin
P00918	-	TAXID:151069	Protocatechuic Acid
P00918	-	TAXID:50225	Quercetin
P00918	-	TAXID:3885	Quercetin
P00918	-	TAXID:3885	Tryptophan
P00918	-	TAXID:128608	Caffeic Acid
P00918	-	TAXID:74645	(+)-Catechin
P00918	-	TAXID:74645	Quercetin
P00918	-	TAXID:51089	Meso-Dihydroguaiaretic Acid
P00918	-	TAXID:51089	Tyrosine
P00918	-	TAXID:4072	Quercetin
P00918	-	TAXID:4072	Vinegar
P00918	-	TAXID:161934	Silymarin
P00918	-	TAXID:180772	P-Coumaric Acid
P00918	-	TAXID:180772	Quercetin
P00918	-	TAXID:180772	Resveratrol
P00918	-	TAXID:13427	Quercetin
P00918	-	TAXID:13427	4-Hydroxyphenylacetic Acid
P00918	-	TAXID:13427	Syringic Acid
P00918	-	TAXID:13427	Caffeic Acid
P00918	-	TAXID:4442	Tea Polyphenol
P00918	-	TAXID:4442	Guaiacol
P00918	-	TAXID:4442	Resveratrol
P00918	-	TAXID:4442	Caffeic Acid
P00918	-	TAXID:4442	(+)-Catechin
P00918	-	TAXID:4442	Quercetin
P00918	-	TAXID:4498	P-Coumaric Acid
P00918	-	TAXID:4498	Caffeic Acid
P00918	-	TAXID:4498	P-Hydroxybenzoic Acid
P00918	-	TAXID:13216	Pyrocatechol
P00918	-	TAXID:13216	Vinegar
P00918	-	TAXID:13216	Butylated Hydroxytoluene
P00918	-	TAXID:13216	Tannic Acid
P00918	-	TAXID:3847	Cadaverine
P00918	-	TAXID:3847	Tryptophan
P00918	-	TAXID:3847	(+)-Catechin
P00918	-	TAXID:3847	P-Nitrophenylphosphate
P00918	-	TAXID:3847	Quercetin
P00918	-	TAXID:3847	Isovaleric Acid
P00918	-	TAXID:3635	Guaiacol
P00918	-	TAXID:22663	Ellagic Acid
P00918	-	TAXID:22663	Quercetin
P00918	-	TAXID:4006	Syringic Acid
P00918	-	TAXID:3711	Spermidine
P00918	-	TAXID:3711	Quercetin
P00918	-	TAXID:3711	Resveratrol
P00918	-	TAXID:3711	Tryptophan
P00918	-	TAXID:3711	Caffeic Acid
P00918	-	TAXID:3659	Quercetin
P00918	-	TAXID:3617	(+)-Catechin
P00918	-	TAXID:3617	Quercetin
P00918	-	TAXID:3617	Tryptophan
P00918	-	TAXID:3617	Tannic Acid
P00918	-	TAXID:4113	P-Coumaric Acid
P00918	-	TAXID:4113	Protocatechuic Acid
P00918	-	TAXID:4113	Serotonin
P00918	-	TAXID:4113	Caffeic Acid
P00918	-	TAXID:4113	Tannic Acid
P00918	-	TAXID:4113	(+)-Catechin
P00918	-	TAXID:4113	Vinegar
P00918	-	TAXID:4113	P-Hydroxybenzoic Acid
P00918	-	TAXID:4113	Tyrosine
P00918	-	TAXID:4113	Tryptophan
P00918	-	TAXID:4111	P-Coumaric Acid
P00918	-	TAXID:4111	Guaiacol
P00918	-	TAXID:4111	Caffeic Acid
P00918	DB01064	-	-
P00918	DB01097	-	-
P00918	DB00153	-	-
P00918	DB00709	-	-
P00918	DB00258	-	-
P00918	DB00259	-	-
P00918	DB00252	-	-
P00918	DB00701	-	-
P00918	DB00703	-	-
P00918	DB00704	-	-
P00918	DB00257	-	-
P00918	DB00254	-	-
P00918	DB00255	-	-
P00918	DB00313	-	-
P00918	DB00311	-	-
P00918	DB00310	-	-
P00918	DB00316	-	-
P00918	DB00091	-	-
P00918	DB00319	-	-
P00918	DB00478	-	-
P00918	DB00570	-	-
P00918	DB00882	-	-
P00918	DB01156	-	-
P00918	DB00184	-	-
P00918	DB01151	-	-
P00918	DB00650	-	-
P00918	DB00227	-	-
P00918	DB00224	-	-
P00918	DB00222	-	-
P00918	DB00220	-	-
P00918	DB00962	-	-
P00918	DB06715	-	-
P00918	DB06710	-	-
P00918	DB03255	-	-
P00918	DB00178	-	-
P00918	DB01075	-	-
P00918	DB01074	-	-
P00918	DB00175	-	-
P00918	DB01076	-	-
P00918	DB00672	-	-
P00918	DB00674	-	-
P00918	DB00675	-	-
P00918	DB00679	-	-
P00918	DB01275	-	-
P00918	DB00251	-	-
P00918	DB00795	-	-
P00918	DB00794	-	-
P00918	DB00793	-	-
P00918	DB00823	-	-
P00918	DB00822	-	-
P00918	DB00415	-	-
P00918	DB00829	-	-
P00918	DB00411	-	-
P00918	DB00412	-	-
P00918	DB00798	-	-
P00918	DB00555	-	-
P00918	DB00554	-	-
P00918	DB00551	-	-
P00918	DB00550	-	-
P00918	DB00553	-	-
P00918	DB00959	-	-
P00918	DB00489	-	-
P00918	DB00488	-	-
P00918	DB00483	-	-
P00918	DB00482	-	-
P00918	DB00481	-	-
P00918	DB00487	-	-
P00918	DB00484	-	-
P00918	DB01103	-	-
P00918	DB01105	-	-
P00918	DB01104	-	-
P00918	DB00214	-	-
P00918	DB00215	-	-
P00918	DB00359	-	-
P00918	DB00357	-	-
P00918	DB00356	-	-
P00918	DB00353	-	-
P00918	DB00350	-	-
P00918	DB06768	-	-
P00918	DB01208	-	-
P00918	DB01203	-	-
P00918	DB01200	-	-
P00918	DB01201	-	-
P00918	DB01611	-	-
P00918	DB01204	-	-
P00918	DB01205	-	-
P00918	DB01199	-	-
P00918	DB01193	-	-
P00918	DB01190	-	-
P00918	DB01191	-	-
P00918	DB01197	-	-
P00918	DB01194	-	-
P00918	DB01037	-	-
P00918	DB01299	-	-
P00918	DB00915	-	-
P00918	DB00384	-	-
P00918	DB00916	-	-
P00918	DB00911	-	-
P00918	DB00529	-	-
P00918	DB00524	-	-
P00918	DB00525	-	-
P00918	DB00919	-	-
P00918	DB00523	-	-
P00918	DB01035	-	-
P00918	DB00135	-	-
P00918	DB01408	-	-
P00918	DB01030	-	-
P00918	DB01032	-	-
P00918	DB01406	-	-
P00918	DB01407	-	-
P00918	DB01400	-	-
P00918	DB00846	-	-
P00918	DB01039	-	-
P00918	DB00951	-	-
P00918	DB00421	-	-
P00918	DB00285	-	-
P00918	DB00284	-	-
P00918	DB00281	-	-
P00918	DB00283	-	-
P00918	DB00437	-	-
P00918	DB00328	-	-
P00918	DB00750	-	-
P00918	DB00756	-	-
P00918	DB00755	-	-
P00918	DB00322	-	-
P00918	DB00320	-	-
P00918	DB00758	-	-
P00918	DB00455	-	-
P00918	DB00324	-	-
P00918	DB00457	-	-
P00918	DB04571	-	-
P00918	DB00420	-	-
P00918	DB00859	-	-
P00918	DB00857	-	-
P00918	DB00850	-	-
P00918	DB00851	-	-
P00918	DB00780	-	-
P00918	DB00428	-	-
P00918	DB00834	-	-
P00918	DB00783	-	-
P00918	DB00784	-	-
P00918	DB00939	-	-
P00918	DB00831	-	-
P00918	DB00393	-	-
P00918	DB00936	-	-
P00918	DB00391	-	-
P00918	DB00390	-	-
P00918	DB00424	-	-
P00918	DB00394	-	-
P00918	DB00547	-	-
P00918	DB00544	-	-
P00918	DB00542	-	-
P00918	DB00543	-	-
P00918	DB00540	-	-
P00918	DB01018	-	-
P00918	DB01016	-	-
P00918	DB01015	-	-
P00918	DB01014	-	-
P00918	DB04868	-	-
P00918	DB01011	-	-
P00918	DB00549	-	-
P00918	DB00233	-	-
P00918	DB00495	-	-
P00918	DB00490	-	-
P00918	DB00493	-	-
P00918	DB08826	-	-
P00918	DB00498	-	-
P00918	DB00499	-	-
P00918	DB00321	-	-
P00918	DB00945	-	-
P00918	DB00734	-	-
P00918	DB00731	-	-
P00918	DB00309	-	-
P00918	DB00733	-	-
P00918	DB00305	-	-
P00918	DB00738	-	-
P00918	DB00302	-	-
P00918	DB01606	-	-
P00918	DB01167	-	-
P00918	DB01166	-	-
P00918	DB01165	-	-
P00918	DB01162	-	-
P00918	DB00426	-	-
P00918	DB01229	-	-
P00918	DB01287	-	-
P00918	DB01186	-	-
P00918	DB01068	-	-
P00918	DB01069	-	-
P00918	DB00160	-	-
P00918	DB00648	-	-
P00918	DB00163	-	-
P00918	DB01062	-	-
P00918	DB01060	-	-
P00918	DB01061	-	-
P00918	DB00641	-	-
P00918	DB01067	-	-
P00918	DB00643	-	-
P00918	DB01065	-	-
P00918	DB01357	-	-
P00918	DB00749	-	-
P00918	DB00298	-	-
P00918	DB00744	-	-
P00918	DB00297	-	-
P00918	DB00740	-	-
P00918	DB00741	-	-
P00918	DB00742	-	-
P00918	DB00291	-	-
P00918	DB00465	-	-
P00918	DB00450	-	-
P00918	DB00467	-	-
P00918	DB00461	-	-
P00918	DB00462	-	-
P00918	DB00469	-	-
P00918	DB00452	-	-
P00918	DB00196	-	-
P00918	DB00190	-	-
P00918	DB00193	-	-
P00918	DB00199	-	-
P00918	DB00869	-	-
P00918	DB00861	-	-
P00918	DB00860	-	-
P00918	DB00863	-	-
P00918	DB00325	-	-
P00918	DB00864	-	-
P00918	DB01113	-	-
P00918	DB01110	-	-
P00918	DB01114	-	-
P00918	DB01115	-	-
P00918	DB00177	-	-
P00918	DB01118	-	-
P00918	DB01119	-	-
P00918	DB01077	-	-
P00918	DB00263	-	-
P00918	DB00262	-	-
P00918	DB00266	-	-
P00918	DB00265	-	-
P00918	DB00264	-	-
P00918	DB00342	-	-
P00918	DB00343	-	-
P00918	DB00347	-	-
P00918	DB00423	-	-
P00918	DB00635	-	-
P00918	DB00636	-	-
P00918	DB00637	-	-
P00918	DB00630	-	-
P00918	DB01233	-	-
P00918	DB01232	-	-
P00918	DB01231	-	-
P00918	DB01235	-	-
P00918	DB01234	-	-
P00918	DB00518	-	-
P00918	DB00904	-	-
P00918	DB01595	-	-
P00918	DB00903	-	-
P00918	DB00513	-	-
P00918	DB00512	-	-
P00918	DB00515	-	-
P00918	DB00514	-	-
P00918	DB00909	-	-
P00918	DB00120	-	-
P00918	DB00688	-	-
P00918	DB00122	-	-
P00918	DB00649	-	-
P00918	DB01023	-	-
P00918	DB00126	-	-
P00918	DB00127	-	-
P00918	DB00681	-	-
P00918	DB00682	-	-
P00918	DB01435	-	-
P00918	DB00684	-	-
P00918	DB01436	-	-
P00918	DB00999	-	-
P00918	DB00995	-	-
P00918	DB00994	-	-
P00918	DB00997	-	-
P00918	DB00996	-	-
P00918	DB00991	-	-
P00918	DB04552	-	-
P00918	DB04573	-	-
P00918	DB00150	-	-
P00918	DB01095	-	-
P00918	DB01092	-	-
P00918	DB01091	-	-
P00918	DB00656	-	-
P00918	DB00655	-	-
P00918	DB00653	-	-
P00918	DB01099	-	-
P00918	DB00651	-	-
P00918	DB01253	-	-
P00918	DB00166	-	-
P00918	DB00788	-	-
P00918	DB00789	-	-
P00918	DB01380	-	-
P00918	DB00935	-	-
P00918	DB00928	-	-
P00918	DB00841	-	-
P00918	DB00934	-	-
P00918	DB00381	-	-
P00918	DB00382	-	-
P00918	DB00844	-	-
P00918	DB00920	-	-
P00918	DB00433	-	-
P00918	DB00848	-	-
P00918	DB00389	-	-
P00918	DB00434	-	-
P00918	DB00396	-	-
P00918	DB01008	-	-
P00918	DB01009	-	-
P00918	DB00531	-	-
P00918	DB00537	-	-
P00918	DB01001	-	-
P00918	DB01002	-	-
P00918	DB01003	-	-
P00918	DB01005	-	-
P00918	DB01006	-	-
P00918	DB00128	-	-
P00918	DB00541	-	-
P00918	DB00279	-	-
P00918	DB00274	-	-
P00918	DB00418	-	-
P00918	DB00277	-	-
P00918	DB00271	-	-
P00918	DB00273	-	-
P00918	DB00376	-	-
P00918	DB00373	-	-
P00918	DB00379	-	-
P00918	DB06150	-	-
P00918	DB01171	-	-
P00918	DB01172	-	-
P00918	DB01173	-	-
P00918	DB01174	-	-
P00918	DB01175	-	-
P00918	DB01176	-	-
P00918	DB01177	-	-
P00918	DB01179	-	-
P00918	DB00970	-	-
P00918	DB00977	-	-
P00918	DB00975	-	-
P00918	DB00502	-	-
P00918	DB00503	-	-
P00918	DB00500	-	-
P00918	DB00978	-	-
P00918	DB01581	-	-
P00918	DB01582	-	-
P00918	DB01053	-	-
P00918	DB00698	-	-
P00918	DB01050	-	-
P00918	DB01056	-	-
P00918	DB01055	-	-
P00918	DB01054	-	-
P00918	DB00692	-	-
P00918	DB01351	-	-
P00918	DB01059	-	-
P00918	DB01058	-	-
P00918	DB00696	-	-
P00918	DB01427	-	-
P00918	DB00694	-	-
P00918	DB00695	-	-
P00918	DB00988	-	-
P00918	DB00987	-	-
P00918	DB00982	-	-
P00918	DB00981	-	-
P00918	DB00591	-	-
P00918	DB00590	-	-
P00918	DB00593	-	-
P00918	DB00595	-	-
P00918	DB00598	-	-
P00918	DB00778	-	-
P00918	DB00809	-	-
P00918	DB00808	-	-
P00918	DB00807	-	-
P00918	DB00806	-	-
P00918	DB00773	-	-
P00918	DB00804	-	-
P00918	DB00776	-	-
P00918	DB00477	-	-
P00918	DB00472	-	-
P00918	DB00836	-	-
P00918	DB00471	-	-
P00918	DB00577	-	-
P00918	DB00576	-	-
P00918	DB00575	-	-
P00918	DB00573	-	-
P00918	DB00572	-	-
P00918	DB00571	-	-
P00918	DB00479	-	-
P00918	DB00186	-	-
P00918	DB00187	-	-
P00918	DB00169	-	-
P00918	DB00180	-	-
P00918	DB00181	-	-
P00918	DB00871	-	-
P00918	DB00877	-	-
P00918	DB00874	-	-
P00918	DB01128	-	-
P00918	DB01121	-	-
P00918	DB01120	-	-
P00918	DB01127	-	-
P00918	DB01125	-	-
P00918	DB00330	-	-
P00918	DB00238	-	-
P00918	DB00239	-	-
P00918	DB00443	-	-
P00918	DB01087	-	-
P00918	DB00235	-	-
P00918	DB00600	-	-
P00918	DB00602	-	-
P00918	DB00604	-	-
P00918	DB01224	-	-
P00918	DB00627	-	-
P00918	DB01221	-	-
P00918	DB01222	-	-
P00918	DB01223	-	-
P00918	DB00898	-	-
P00918	DB00950	-	-
P00918	DB05260	-	-
P00918	DB01339	-	-
P00918	DB00730	-	-
P00918	DB01026	-	-
P00918	DB01148	-	-
P00918	DB01144	-	-
P00918	DB01147	-	-
P00918	DB01143	-	-
P00918	DB01142	-	-
P00918	DB00143	-	-
P00918	DB01082	-	-
P00918	DB00839	-	-
P00918	DB01086	-	-
P00918	DB00145	-	-
P00918	DB00623	-	-
P00918	DB00620	-	-
P00918	DB01325	-	-
P00918	DB00624	-	-
P00918	DB01242	-	-
P00918	DB01241	-	-
P00918	DB01248	-	-
P00918	DB01394	-	-
P00918	DB01396	-	-
P00918	DB01390	-	-
P00918	DB01392	-	-
P00918	DB01393	-	-
P00918	DB06147	-	-
P00918	DB01399	-	-
P00918	DB00818	-	-
P00918	DB00819	-	-
P00918	DB00762	-	-
P00918	DB00763	-	-
P00918	DB00812	-	-
P00918	DB00761	-	-
P00918	DB00814	-	-
P00918	DB00765	-	-
P00918	DB00568	-	-
P00918	DB00401	-	-
P00918	DB00400	-	-
P00918	DB00406	-	-
P00918	DB00404	-	-
P00918	DB00561	-	-
P00918	DB00563	-	-
P00918	DB00564	-	-
P00918	DB04841	-	-
P00918	DB00567	-	-
P00918	DB00759	-	-
P00918	DB01426	-	-
P00918	DB00887	-	-
P00918	DB00884	-	-
P00918	DB00968	-	-
P00918	DB00969	-	-
P00918	DB00881	-	-
P00918	DB06148	-	-
P00918	DB00967	-	-
P00918	DB00960	-	-
P00918	DB00961	-	-
P00918	DB00889	-	-
P00918	DB00963	-	-
P00918	DB06729	-	-
P00918	DB00249	-	-
P00918	DB01021	-	-
P00918	DB00717	-	-
P00918	DB00715	-	-
P00918	DB00242	-	-
P00918	DB00245	-	-
P00918	DB00712	-	-
P00918	DB00247	-	-
P00918	DB00367	-	-
P00918	DB00365	-	-
P00918	DB00363	-	-
P00918	DB00361	-	-
P00918	DB01024	-	-
P00918	DB03166	-	-
P00918	DB01020	-	-
P00918	DB00614	-	-
P00918	DB00615	-	-
P00918	DB01211	-	-
P00918	DB01210	-	-
P00918	DB01213	-	-
P00918	DB00619	-	-
P00918	DB01217	-	-
P00918	DB01216	-	-
P00918	DB06698	-	-
P00918	DB01188	-	-
P00918	DB01627	-	-
P00918	DB01181	-	-
P00918	DB06691	-	-
P00918	DB01183	-	-
P00918	DB01182	-	-
P00918	DB01184	-	-
P00918	DB06697	-	-
P00918	DB00685	-	-
P00918	DB06218	-	-
P00918	DB00811	-	-
P00918	DB01029	-	-
P00918	DB00760	-	-
P00918	DB08807	-	-
P00918	DB04838	-	-
P00918	DB01599	-	-
P00918	DB01044	-	-
P00918	DB01045	-	-
P00918	DB00104	-	-
P00918	DB01047	-	-
P00918	DB01041	-	-
P00918	DB01042	-	-
P00918	DB00661	-	-
P00918	DB00669	-	-
P00918	DB00668	-	-
P00918	DB00583	-	-
P00918	DB00586	-	-
P00918	DB00584	-	-
P00918	DB00585	-	-
P00918	DB08797	-	-
P00918	DB00589	-	-
P00918	DB00339	-	-
P00918	DB00724	-	-
P00918	DB00725	-	-
P00918	DB00722	-	-
P00918	DB00721	-	-
P00918	DB00331	-	-
P00918	DB00446	-	-
P00918	DB00445	-	-
P00918	DB00335	-	-
P00918	DB00334	-	-
P00918	DB00441	-	-
P00918	DB01168	-	-
P00918	DB01136	-	-
P00918	DB01137	-	-
P00918	DB01132	-	-
P00918	DB01206	-	-
P00918	DB00207	-	-
P00918	DB00206	-	-
P00918	DB00201	-	-
P00918	DB00202	-	-
P00918	DB00208	-	-
P00918	DB06770	-	-
P41145	-	TAXID:65948	Apigenin
P41145	-	TAXID:74900	Hyperin
P41145	-	TAXID:51240	(-)-Epigallocatechin
P41145	-	TAXID:58860	(+)-Catechin
P41145	-	TAXID:4081	Naringenin
P41145	-	TAXID:4442	(-)-Epigallocatechin
P41145	-	TAXID:4442	Hesperetin
P41145	-	TAXID:4442	(+)-Catechin
P41145	-	TAXID:4442	Apigenin
P41145	-	TAXID:4442	Daidzein
P41145	-	TAXID:4442	Epicatechin Gallate
P41145	-	TAXID:4442	Naringenin
P41145	-	TAXID:4577	Naringenin
P41145	-	TAXID:36610	Apigenin
P41145	-	TAXID:36610	Hyperin
P41145	-	TAXID:4513	(+)-Catechin
P41145	-	TAXID:4679	Taxifolin
P41145	-	TAXID:4047	Falcarindiol
P41145	-	TAXID:78168	Apigenin
P41145	-	TAXID:175228	Taxifolin
P41145	-	TAXID:89151	Apigenin
P41145	-	TAXID:3760	Hesperetin
P41145	-	TAXID:32224	(+)-Catechin
P41145	-	TAXID:32224	(-)-Epigallocatechin
P41145	-	TAXID:4146	Apigenin
P41145	-	TAXID:4045	Apigenin
P41145	-	TAXID:4045	Hyperin
P41145	-	TAXID:3469	Tramadol
P41145	-	TAXID:3864	(+)-Catechin
P41145	-	TAXID:29760	(+)-Catechin
P41145	-	TAXID:29760	(-)-Epigallocatechin
P41145	-	TAXID:29780	(+)-Catechin
P41145	-	TAXID:29780	(-)-Epigallocatechin
P41145	-	TAXID:3649	Daidzein
P41145	-	TAXID:3747	(+)-Catechin
P41145	-	TAXID:3747	Naringenin
P41145	-	TAXID:3747	(-)-Epigallocatechin
P41145	-	TAXID:3708	Naringenin
P41145	-	TAXID:120290	(+)-Catechin
P41145	-	TAXID:120290	Naringenin
P41145	-	TAXID:120290	Hyperin
P41145	-	TAXID:40922	Falcarindiol
P41145	-	TAXID:4681	Hyperin
P41145	-	TAXID:49827	Naringenin
P41145	-	TAXID:35925	(+)-Catechin
P41145	-	TAXID:35925	(-)-Epigallocatechin
P41145	-	TAXID:3888	Naringenin
P41145	-	TAXID:3888	Daidzein
P41145	-	TAXID:94328	Apigenin
P41145	-	TAXID:151069	(+)-Catechin
P41145	-	TAXID:151069	Taxifolin
P41145	-	TAXID:41241	(+)-Catechin
P41145	-	TAXID:4072	Apigenin
P41145	-	TAXID:48038	Falcarindiol
P41145	-	TAXID:3847	(+)-Catechin
P41145	-	TAXID:3847	Apigenin
P41145	-	TAXID:3847	Naringenin
P41145	-	TAXID:3847	Daidzein
P41145	-	TAXID:74645	(+)-Catechin
P41145	-	TAXID:22663	(-)-Epigallocatechin
P41145	-	TAXID:3435	(+)-Catechin
P41145	-	TAXID:3617	(+)-Catechin
P41145	-	TAXID:4039	Falcarindiol
P41145	-	TAXID:4113	(+)-Catechin
P41145	-	TAXID:3641	(+)-Catechin
P41145	DB01064	-	-
P41145	DB01097	-	-
P41145	DB00153	-	-
P41145	DB00709	-	-
P41145	DB00258	-	-
P41145	DB00259	-	-
P41145	DB00252	-	-
P41145	DB00701	-	-
P41145	DB00251	-	-
P41145	DB00704	-	-
P41145	DB00257	-	-
P41145	DB00254	-	-
P41145	DB00255	-	-
P41145	DB00313	-	-
P41145	DB00310	-	-
P41145	DB00316	-	-
P41145	DB00091	-	-
P41145	DB00319	-	-
P41145	DB00318	-	-
P41145	DB00478	-	-
P41145	DB00570	-	-
P41145	DB00882	-	-
P41145	DB06274	-	-
P41145	DB01156	-	-
P41145	DB01151	-	-
P41145	DB00650	-	-
P41145	DB00227	-	-
P41145	DB00224	-	-
P41145	DB00222	-	-
P41145	DB00220	-	-
P41145	DB00962	-	-
P41145	DB06710	-	-
P41145	DB03255	-	-
P41145	DB00178	-	-
P41145	DB01075	-	-
P41145	DB01074	-	-
P41145	DB01077	-	-
P41145	DB01076	-	-
P41145	DB00672	-	-
P41145	DB00674	-	-
P41145	DB00675	-	-
P41145	DB00679	-	-
P41145	DB01275	-	-
P41145	DB00795	-	-
P41145	DB00794	-	-
P41145	DB00793	-	-
P41145	DB00823	-	-
P41145	DB00822	-	-
P41145	DB00415	-	-
P41145	DB00829	-	-
P41145	DB00411	-	-
P41145	DB00412	-	-
P41145	DB00798	-	-
P41145	DB00555	-	-
P41145	DB00554	-	-
P41145	DB00550	-	-
P41145	DB00553	-	-
P41145	DB00959	-	-
P41145	DB00489	-	-
P41145	DB00488	-	-
P41145	DB00483	-	-
P41145	DB00950	-	-
P41145	DB00481	-	-
P41145	DB00487	-	-
P41145	DB00484	-	-
P41145	DB01100	-	-
P41145	DB01103	-	-
P41145	DB01105	-	-
P41145	DB01104	-	-
P41145	DB00214	-	-
P41145	DB00215	-	-
P41145	DB00359	-	-
P41145	DB00357	-	-
P41145	DB00356	-	-
P41145	DB00353	-	-
P41145	DB00350	-	-
P41145	DB01208	-	-
P41145	DB01203	-	-
P41145	DB01200	-	-
P41145	DB01201	-	-
P41145	DB01611	-	-
P41145	DB01204	-	-
P41145	DB01205	-	-
P41145	DB01199	-	-
P41145	DB01193	-	-
P41145	DB01190	-	-
P41145	DB01191	-	-
P41145	DB01197	-	-
P41145	DB01299	-	-
P41145	DB00915	-	-
P41145	DB00384	-	-
P41145	DB00916	-	-
P41145	DB00911	-	-
P41145	DB00529	-	-
P41145	DB00524	-	-
P41145	DB00525	-	-
P41145	DB00919	-	-
P41145	DB00523	-	-
P41145	DB01035	-	-
P41145	DB01037	-	-
P41145	DB01408	-	-
P41145	DB01030	-	-
P41145	DB01032	-	-
P41145	DB01406	-	-
P41145	DB01407	-	-
P41145	DB01400	-	-
P41145	DB00846	-	-
P41145	DB01039	-	-
P41145	DB00951	-	-
P41145	DB00433	-	-
P41145	DB00421	-	-
P41145	DB00285	-	-
P41145	DB00284	-	-
P41145	DB00281	-	-
P41145	DB00283	-	-
P41145	DB00437	-	-
P41145	DB00328	-	-
P41145	DB00750	-	-
P41145	DB00756	-	-
P41145	DB00755	-	-
P41145	DB00322	-	-
P41145	DB00320	-	-
P41145	DB00758	-	-
P41145	DB00454	-	-
P41145	DB00327	-	-
P41145	DB00324	-	-
P41145	DB00457	-	-
P41145	DB04571	-	-
P41145	DB00859	-	-
P41145	DB00854	-	-
P41145	DB00857	-	-
P41145	DB00850	-	-
P41145	DB00851	-	-
P41145	DB00836	-	-
P41145	DB00428	-	-
P41145	DB00834	-	-
P41145	DB00783	-	-
P41145	DB00784	-	-
P41145	DB00939	-	-
P41145	DB00831	-	-
P41145	DB00393	-	-
P41145	DB00789	-	-
P41145	DB00935	-	-
P41145	DB00390	-	-
P41145	DB00424	-	-
P41145	DB00394	-	-
P41145	DB00547	-	-
P41145	DB00544	-	-
P41145	DB00542	-	-
P41145	DB00543	-	-
P41145	DB00540	-	-
P41145	DB01018	-	-
P41145	DB01016	-	-
P41145	DB01015	-	-
P41145	DB01014	-	-
P41145	DB01011	-	-
P41145	DB00549	-	-
P41145	DB00233	-	-
P41145	DB00495	-	-
P41145	DB00490	-	-
P41145	DB00493	-	-
P41145	DB08826	-	-
P41145	DB00498	-	-
P41145	DB00499	-	-
P41145	DB00321	-	-
P41145	DB00945	-	-
P41145	DB00734	-	-
P41145	DB00731	-	-
P41145	DB00309	-	-
P41145	DB00733	-	-
P41145	DB00305	-	-
P41145	DB00738	-	-
P41145	DB00302	-	-
P41145	DB01606	-	-
P41145	DB01167	-	-
P41145	DB01166	-	-
P41145	DB01165	-	-
P41145	DB01162	-	-
P41145	DB00426	-	-
P41145	DB01168	-	-
P41145	DB01287	-	-
P41145	DB06697	-	-
P41145	DB01068	-	-
P41145	DB01069	-	-
P41145	DB00649	-	-
P41145	DB00648	-	-
P41145	DB00163	-	-
P41145	DB01062	-	-
P41145	DB01060	-	-
P41145	DB01061	-	-
P41145	DB00641	-	-
P41145	DB01067	-	-
P41145	DB00643	-	-
P41145	DB01065	-	-
P41145	DB01357	-	-
P41145	DB00749	-	-
P41145	DB00298	-	-
P41145	DB00744	-	-
P41145	DB00297	-	-
P41145	DB00295	-	-
P41145	DB00740	-	-
P41145	DB00741	-	-
P41145	DB00742	-	-
P41145	DB00291	-	-
P41145	DB00465	-	-
P41145	DB00450	-	-
P41145	DB00467	-	-
P41145	DB00461	-	-
P41145	DB00462	-	-
P41145	DB00469	-	-
P41145	DB00452	-	-
P41145	DB00196	-	-
P41145	DB00190	-	-
P41145	DB00193	-	-
P41145	DB00199	-	-
P41145	DB00455	-	-
P41145	DB00861	-	-
P41145	DB00860	-	-
P41145	DB00863	-	-
P41145	DB00325	-	-
P41145	DB00864	-	-
P41145	DB01113	-	-
P41145	DB01110	-	-
P41145	DB01114	-	-
P41145	DB01115	-	-
P41145	DB00177	-	-
P41145	DB01118	-	-
P41145	DB01119	-	-
P41145	DB00175	-	-
P41145	DB00263	-	-
P41145	DB00262	-	-
P41145	DB00266	-	-
P41145	DB00265	-	-
P41145	DB00264	-	-
P41145	DB00342	-	-
P41145	DB00343	-	-
P41145	DB00347	-	-
P41145	DB00423	-	-
P41145	DB00635	-	-
P41145	DB00636	-	-
P41145	DB00637	-	-
P41145	DB00630	-	-
P41145	DB01233	-	-
P41145	DB01232	-	-
P41145	DB01231	-	-
P41145	DB01235	-	-
P41145	DB01234	-	-
P41145	DB00104	-	-
P41145	DB00518	-	-
P41145	DB00904	-	-
P41145	DB01047	-	-
P41145	DB00903	-	-
P41145	DB00513	-	-
P41145	DB00512	-	-
P41145	DB00515	-	-
P41145	DB00514	-	-
P41145	DB01026	-	-
P41145	DB00688	-	-
P41145	DB00122	-	-
P41145	DB01023	-	-
P41145	DB00126	-	-
P41145	DB01021	-	-
P41145	DB00681	-	-
P41145	DB00682	-	-
P41145	DB01435	-	-
P41145	DB00684	-	-
P41145	DB01436	-	-
P41145	DB00999	-	-
P41145	DB00995	-	-
P41145	DB00994	-	-
P41145	DB00997	-	-
P41145	DB00996	-	-
P41145	DB00991	-	-
P41145	DB04552	-	-
P41145	DB04573	-	-
P41145	DB00780	-	-
P41145	DB01095	-	-
P41145	DB01094	-	-
P41145	DB01092	-	-
P41145	DB01091	-	-
P41145	DB00656	-	-
P41145	DB00655	-	-
P41145	DB00652	-	-
P41145	DB01099	-	-
P41145	DB00651	-	-
P41145	DB01253	-	-
P41145	DB00166	-	-
P41145	DB00788	-	-
P41145	DB00420	-	-
P41145	DB01380	-	-
P41145	DB00391	-	-
P41145	DB00928	-	-
P41145	DB00841	-	-
P41145	DB00934	-	-
P41145	DB00381	-	-
P41145	DB00382	-	-
P41145	DB00844	-	-
P41145	DB00920	-	-
P41145	DB00921	-	-
P41145	DB00848	-	-
P41145	DB00389	-	-
P41145	DB00434	-	-
P41145	DB00396	-	-
P41145	DB01008	-	-
P41145	DB01009	-	-
P41145	DB00531	-	-
P41145	DB00537	-	-
P41145	DB01001	-	-
P41145	DB01002	-	-
P41145	DB01003	-	-
P41145	DB01005	-	-
P41145	DB01006	-	-
P41145	DB00541	-	-
P41145	DB00279	-	-
P41145	DB00274	-	-
P41145	DB00418	-	-
P41145	DB00277	-	-
P41145	DB00271	-	-
P41145	DB00376	-	-
P41145	DB00373	-	-
P41145	DB06800	-	-
P41145	DB00379	-	-
P41145	DB06150	-	-
P41145	DB01171	-	-
P41145	DB01172	-	-
P41145	DB01173	-	-
P41145	DB01174	-	-
P41145	DB01175	-	-
P41145	DB01176	-	-
P41145	DB01177	-	-
P41145	DB01179	-	-
P41145	DB00970	-	-
P41145	DB00977	-	-
P41145	DB00975	-	-
P41145	DB00502	-	-
P41145	DB00503	-	-
P41145	DB00500	-	-
P41145	DB00978	-	-
P41145	DB01581	-	-
P41145	DB01582	-	-
P41145	DB01053	-	-
P41145	DB00698	-	-
P41145	DB01050	-	-
P41145	DB01056	-	-
P41145	DB01055	-	-
P41145	DB01054	-	-
P41145	DB00692	-	-
P41145	DB01351	-	-
P41145	DB01059	-	-
P41145	DB01058	-	-
P41145	DB01426	-	-
P41145	DB01427	-	-
P41145	DB00694	-	-
P41145	DB00695	-	-
P41145	DB00987	-	-
P41145	DB00982	-	-
P41145	DB00981	-	-
P41145	DB00591	-	-
P41145	DB00590	-	-
P41145	DB00593	-	-
P41145	DB00595	-	-
P41145	DB00598	-	-
P41145	DB00778	-	-
P41145	DB00809	-	-
P41145	DB00808	-	-
P41145	DB00807	-	-
P41145	DB00806	-	-
P41145	DB00773	-	-
P41145	DB00804	-	-
P41145	DB00776	-	-
P41145	DB00477	-	-
P41145	DB00472	-	-
P41145	DB00471	-	-
P41145	DB00577	-	-
P41145	DB00576	-	-
P41145	DB00575	-	-
P41145	DB00573	-	-
P41145	DB00572	-	-
P41145	DB00571	-	-
P41145	DB00479	-	-
P41145	DB00186	-	-
P41145	DB00187	-	-
P41145	DB00184	-	-
P41145	DB00180	-	-
P41145	DB00181	-	-
P41145	DB00871	-	-
P41145	DB00877	-	-
P41145	DB00874	-	-
P41145	DB01128	-	-
P41145	DB01121	-	-
P41145	DB01120	-	-
P41145	DB01127	-	-
P41145	DB01125	-	-
P41145	DB00330	-	-
P41145	DB00445	-	-
P41145	DB00238	-	-
P41145	DB00239	-	-
P41145	DB00443	-	-
P41145	DB00145	-	-
P41145	DB00235	-	-
P41145	DB00600	-	-
P41145	DB00602	-	-
P41145	DB00604	-	-
P41145	DB01224	-	-
P41145	DB01221	-	-
P41145	DB01222	-	-
P41145	DB01223	-	-
P41145	DB00898	-	-
P41145	DB00482	-	-
P41145	DB00936	-	-
P41145	DB00956	-	-
P41145	DB01339	-	-
P41145	DB00730	-	-
P41145	DB01148	-	-
P41145	DB01147	-	-
P41145	DB01143	-	-
P41145	DB01142	-	-
P41145	DB01082	-	-
P41145	DB00839	-	-
P41145	DB01086	-	-
P41145	DB01087	-	-
P41145	DB00623	-	-
P41145	DB00620	-	-
P41145	DB00627	-	-
P41145	DB00624	-	-
P41145	DB01242	-	-
P41145	DB01243	-	-
P41145	DB01241	-	-
P41145	DB01248	-	-
P41145	DB01394	-	-
P41145	DB01396	-	-
P41145	DB06148	-	-
P41145	DB00169	-	-
P41145	DB01392	-	-
P41145	DB01393	-	-
P41145	DB06147	-	-
P41145	DB01399	-	-
P41145	DB00818	-	-
P41145	DB00819	-	-
P41145	DB00762	-	-
P41145	DB00763	-	-
P41145	DB00812	-	-
P41145	DB00813	-	-
P41145	DB00814	-	-
P41145	DB00765	-	-
P41145	DB00568	-	-
P41145	DB00401	-	-
P41145	DB00400	-	-
P41145	DB00406	-	-
P41145	DB00404	-	-
P41145	DB00561	-	-
P41145	DB00563	-	-
P41145	DB00564	-	-
P41145	DB04841	-	-
P41145	DB00567	-	-
P41145	DB00759	-	-
P41145	DB00696	-	-
P41145	DB00884	-	-
P41145	DB00968	-	-
P41145	DB00969	-	-
P41145	DB00881	-	-
P41145	DB00967	-	-
P41145	DB00960	-	-
P41145	DB00961	-	-
P41145	DB00889	-	-
P41145	DB00963	-	-
P41145	DB06729	-	-
P41145	DB00249	-	-
P41145	DB00717	-	-
P41145	DB00715	-	-
P41145	DB00242	-	-
P41145	DB00245	-	-
P41145	DB00712	-	-
P41145	DB00247	-	-
P41145	DB00367	-	-
P41145	DB00365	-	-
P41145	DB00363	-	-
P41145	DB00361	-	-
P41145	DB01024	-	-
P41145	DB03166	-	-
P41145	DB00611	-	-
P41145	DB00614	-	-
P41145	DB00615	-	-
P41145	DB01211	-	-
P41145	DB01210	-	-
P41145	DB01213	-	-
P41145	DB00619	-	-
P41145	DB01217	-	-
P41145	DB01216	-	-
P41145	DB06698	-	-
P41145	DB01188	-	-
P41145	DB01627	-	-
P41145	DB01181	-	-
P41145	DB06691	-	-
P41145	DB01183	-	-
P41145	DB01182	-	-
P41145	DB01184	-	-
P41145	DB01186	-	-
P41145	DB00685	-	-
P41145	DB00811	-	-
P41145	DB01029	-	-
P41145	DB00760	-	-
P41145	DB08807	-	-
P41145	DB04838	-	-
P41145	DB01599	-	-
P41145	DB01044	-	-
P41145	DB01045	-	-
P41145	DB01229	-	-
P41145	DB01595	-	-
P41145	DB01041	-	-
P41145	DB01042	-	-
P41145	DB00661	-	-
P41145	DB00669	-	-
P41145	DB00668	-	-
P41145	DB00583	-	-
P41145	DB00586	-	-
P41145	DB00584	-	-
P41145	DB00585	-	-
P41145	DB08797	-	-
P41145	DB00589	-	-
P41145	DB00339	-	-
P41145	DB00724	-	-
P41145	DB00725	-	-
P41145	DB00722	-	-
P41145	DB00721	-	-
P41145	DB00331	-	-
P41145	DB00446	-	-
P41145	DB00333	-	-
P41145	DB00335	-	-
P41145	DB00334	-	-
P41145	DB00441	-	-
P41145	DB01136	-	-
P41145	DB01137	-	-
P41145	DB01132	-	-
P41145	DB01206	-	-
P41145	DB00207	-	-
P41145	DB00206	-	-
P41145	DB00201	-	-
P41145	DB00202	-	-
P41145	DB00208	-	-
P41145	DB06770	-	-
P08912	-	TAXID:48038	Arecoline
P08912	-	TAXID:94328	Carbachol
P08912	DB01064	-	-
P08912	DB01097	-	-
P08912	DB00153	-	-
P08912	DB00709	-	-
P08912	DB00258	-	-
P08912	DB00259	-	-
P08912	DB00252	-	-
P08912	DB00701	-	-
P08912	DB00251	-	-
P08912	DB00704	-	-
P08912	DB00257	-	-
P08912	DB00254	-	-
P08912	DB00255	-	-
P08912	DB00313	-	-
P08912	DB00310	-	-
P08912	DB00316	-	-
P08912	DB00091	-	-
P08912	DB00319	-	-
P08912	DB00478	-	-
P08912	DB00570	-	-
P08912	DB00882	-	-
P08912	DB01156	-	-
P08912	DB01151	-	-
P08912	DB00650	-	-
P08912	DB00227	-	-
P08912	DB00224	-	-
P08912	DB00222	-	-
P08912	DB00220	-	-
P08912	DB00962	-	-
P08912	DB06710	-	-
P08912	DB03255	-	-
P08912	DB00178	-	-
P08912	DB01075	-	-
P08912	DB01074	-	-
P08912	DB01077	-	-
P08912	DB01076	-	-
P08912	DB00670	-	-
P08912	DB00672	-	-
P08912	DB00674	-	-
P08912	DB00675	-	-
P08912	DB00679	-	-
P08912	DB01275	-	-
P08912	DB00795	-	-
P08912	DB00794	-	-
P08912	DB00793	-	-
P08912	DB00823	-	-
P08912	DB00822	-	-
P08912	DB00415	-	-
P08912	DB00829	-	-
P08912	DB00411	-	-
P08912	DB00412	-	-
P08912	DB00798	-	-
P08912	DB00555	-	-
P08912	DB00554	-	-
P08912	DB00550	-	-
P08912	DB00553	-	-
P08912	DB00959	-	-
P08912	DB00489	-	-
P08912	DB00488	-	-
P08912	DB00483	-	-
P08912	DB00950	-	-
P08912	DB00481	-	-
P08912	DB00487	-	-
P08912	DB00484	-	-
P08912	DB01103	-	-
P08912	DB01105	-	-
P08912	DB01104	-	-
P08912	DB00214	-	-
P08912	DB00215	-	-
P08912	DB00359	-	-
P08912	DB00357	-	-
P08912	DB00356	-	-
P08912	DB00353	-	-
P08912	DB00350	-	-
P08912	DB01208	-	-
P08912	DB01203	-	-
P08912	DB01200	-	-
P08912	DB01201	-	-
P08912	DB01611	-	-
P08912	DB01204	-	-
P08912	DB01205	-	-
P08912	DB01199	-	-
P08912	DB01193	-	-
P08912	DB01190	-	-
P08912	DB01191	-	-
P08912	DB01197	-	-
P08912	DB01299	-	-
P08912	DB01030	-	-
P08912	DB00915	-	-
P08912	DB00384	-	-
P08912	DB00916	-	-
P08912	DB00911	-	-
P08912	DB00529	-	-
P08912	DB00524	-	-
P08912	DB00525	-	-
P08912	DB00919	-	-
P08912	DB00523	-	-
P08912	DB01035	-	-
P08912	DB01037	-	-
P08912	DB01036	-	-
P08912	DB01408	-	-
P08912	DB01409	-	-
P08912	DB01032	-	-
P08912	DB01406	-	-
P08912	DB01407	-	-
P08912	DB01400	-	-
P08912	DB00381	-	-
P08912	DB01039	-	-
P08912	DB00951	-	-
P08912	DB00421	-	-
P08912	DB00285	-	-
P08912	DB00284	-	-
P08912	DB00281	-	-
P08912	DB00283	-	-
P08912	DB00437	-	-
P08912	DB00328	-	-
P08912	DB00750	-	-
P08912	DB00756	-	-
P08912	DB00755	-	-
P08912	DB00322	-	-
P08912	DB00320	-	-
P08912	DB00758	-	-
P08912	DB00455	-	-
P08912	DB00324	-	-
P08912	DB00457	-	-
P08912	DB04571	-	-
P08912	DB00859	-	-
P08912	DB00857	-	-
P08912	DB00850	-	-
P08912	DB00851	-	-
P08912	DB00780	-	-
P08912	DB00428	-	-
P08912	DB00834	-	-
P08912	DB00783	-	-
P08912	DB00784	-	-
P08912	DB00939	-	-
P08912	DB00831	-	-
P08912	DB00393	-	-
P08912	DB00789	-	-
P08912	DB00935	-	-
P08912	DB00390	-	-
P08912	DB00424	-	-
P08912	DB00394	-	-
P08912	DB00547	-	-
P08912	DB00544	-	-
P08912	DB00542	-	-
P08912	DB00543	-	-
P08912	DB00540	-	-
P08912	DB01018	-	-
P08912	DB01016	-	-
P08912	DB01015	-	-
P08912	DB01014	-	-
P08912	DB01011	-	-
P08912	DB00549	-	-
P08912	DB00233	-	-
P08912	DB00495	-	-
P08912	DB00496	-	-
P08912	DB00490	-	-
P08912	DB00493	-	-
P08912	DB08826	-	-
P08912	DB00498	-	-
P08912	DB00499	-	-
P08912	DB00321	-	-
P08912	DB00945	-	-
P08912	DB00734	-	-
P08912	DB00731	-	-
P08912	DB00309	-	-
P08912	DB00733	-	-
P08912	DB00305	-	-
P08912	DB00738	-	-
P08912	DB00302	-	-
P08912	DB01606	-	-
P08912	DB01167	-	-
P08912	DB01166	-	-
P08912	DB01165	-	-
P08912	DB01162	-	-
P08912	DB00426	-	-
P08912	DB01168	-	-
P08912	DB01287	-	-
P08912	DB06697	-	-
P08912	DB01068	-	-
P08912	DB01069	-	-
P08912	DB00649	-	-
P08912	DB00648	-	-
P08912	DB00163	-	-
P08912	DB01062	-	-
P08912	DB01060	-	-
P08912	DB01061	-	-
P08912	DB00641	-	-
P08912	DB01067	-	-
P08912	DB00643	-	-
P08912	DB01065	-	-
P08912	DB01357	-	-
P08912	DB00749	-	-
P08912	DB00298	-	-
P08912	DB00744	-	-
P08912	DB00297	-	-
P08912	DB00740	-	-
P08912	DB00741	-	-
P08912	DB00742	-	-
P08912	DB00291	-	-
P08912	DB00465	-	-
P08912	DB00450	-	-
P08912	DB00467	-	-
P08912	DB00461	-	-
P08912	DB00462	-	-
P08912	DB00469	-	-
P08912	DB00452	-	-
P08912	DB00196	-	-
P08912	DB00190	-	-
P08912	DB00193	-	-
P08912	DB00199	-	-
P08912	DB00861	-	-
P08912	DB00860	-	-
P08912	DB00863	-	-
P08912	DB00325	-	-
P08912	DB00864	-	-
P08912	DB01113	-	-
P08912	DB01110	-	-
P08912	DB01114	-	-
P08912	DB01115	-	-
[truncated: 17,178 more rows]

[truncated: 3 more sheets: Reproductive, Respiratory, Substance-related]
