# Supplementary material for: Developing a Molecular Roadmap of Drug-Food Interactions
Source: PLoS Comput Biol. 2015 Feb 10;11(2):e1004048. doi: 10.1371/journal.pcbi.1004048 (PMC4323218; doi:10.1371/journal.pcbi.1004048)
Supplement: S4 Table — Drugs and phytochemicals with activity against the same ADME-related protein. (XLSX) [file pcbi.1004048.s004.xlsx]

## Sheet: Carrier
Protein	Drug name	Plant source	Plant compound
P02753	-	TAXID:3755	Retinol
P02753	-	TAXID:3726	Retinol
P02753	-	TAXID:3712	Retinol
P02753	-	TAXID:48038	Retinol
P02753	DB00162	-	-
P04278	-	TAXID:4222	Matairesinol
P04278	-	TAXID:4236	Ethinyl Estradiol
P04278	-	TAXID:49827	Dihydrotestosterone
P04278	-	TAXID:4006	Matairesinol
P04278	DB04573	-	-
P04278	DB00367	-	-
P04278	DB00783	-	-
P04278	DB00977	-	-
P04278	DB00294	-	-
P04278	DB00655	-	-
P04278	DB00741	-	-
P04278	DB00396	-	-
P04278	DB00717	-	-
P04278	DB00304	-	-
P04278	DB01406	-	-
P04278	DB00624	-	-
P04278	DB06710	-	-
P02768	-	TAXID:157791	Tryptophan
P02768	-	TAXID:3469	Phenylbutazone
P02768	-	TAXID:3711	Resveratrol
P02768	-	TAXID:3711	Tryptophan
P02768	-	TAXID:3747	Resveratrol
P02768	-	TAXID:175228	Resveratrol
P02768	-	TAXID:3562	Tryptophan
P02768	-	TAXID:4081	Resveratrol
P02768	-	TAXID:4565	Resveratrol
P02768	-	TAXID:29760	Resveratrol
P02768	-	TAXID:4682	Tryptophan
P02768	-	TAXID:3885	Tryptophan
P02768	-	TAXID:4045	Tryptophan
P02768	-	TAXID:4679	Tryptophan
P02768	-	TAXID:3617	Tryptophan
P02768	-	TAXID:180772	Resveratrol
P02768	-	TAXID:3888	Tryptophan
P02768	-	TAXID:4442	Resveratrol
P02768	-	TAXID:4442	Caffeine
P02768	-	TAXID:3847	Tryptophan
P02768	-	TAXID:3847	Sodium Cholate
P02768	-	TAXID:4577	Lincomycin
P02768	-	TAXID:4577	Tryptophan
P02768	-	TAXID:4006	Sodium Cholate
P02768	-	TAXID:3818	Resveratrol
P02768	-	TAXID:3621	Resveratrol
P02768	-	TAXID:3621	Sodium Cholate
P02768	-	TAXID:50225	Leukotriene B4
P02768	-	TAXID:4113	Tryptophan
P02768	-	TAXID:3708	Tryptophan
P02768	-	TAXID:3641	Caffeine
P02768	DB00150	-	-
P02768	DB00783	-	-
P02768	DB01092	-	-
P02768	DB00938	-	-
P02768	DB00788	-	-
P02768	DB00936	-	-
P02768	DB01147	-	-
P02768	DB01141	-	-
P02768	DB00424	-	-
P02768	DB01099	-	-
P02768	DB00839	-	-
P02768	DB00252	-	-
P02768	DB01016	-	-
P02768	DB00257	-	-
P02768	DB00254	-	-
P02768	DB00316	-	-
P02768	DB00572	-	-
P02768	DB00495	-	-
P02768	DB00571	-	-
P02768	DB00420	-	-
P02768	DB00945	-	-
P02768	DB00842	-	-
P02768	DB01586	-	-
P02768	DB01159	-	-
P02768	DB01156	-	-
P02768	DB00625	-	-
P02768	DB00624	-	-
P02768	DB01009	-	-
P02768	DB00537	-	-
P02768	DB01001	-	-
P02768	DB01003	-	-
P02768	DB00396	-	-
P02768	DB01248	-	-
P02768	DB00303	-	-
P02768	DB00224	-	-
P02768	DB00220	-	-
P02768	DB01396	-	-
P02768	DB01418	-	-
P02768	DB05039	-	-
P02768	DB00812	-	-
P02768	DB01072	-	-
P02768	DB01068	-	-
P02768	DB01601	-	-
P02768	DB01167	-	-
P02768	DB01165	-	-
P02768	DB01162	-	-
P02768	DB00701	-	-
P02768	DB00563	-	-
P02768	DB00564	-	-
P02768	DB00690	-	-
P02768	DB00567	-	-
P02768	DB02703	-	-
P02768	DB00373	-	-
P02768	DB00705	-	-
P02768	DB00887	-	-
P02768	DB00960	-	-
P02768	DB00795	-	-
P02768	DB06150	-	-
P02768	DB06729	-	-
P02768	DB01060	-	-
P02768	DB00417	-	-
P02768	DB00829	-	-
P02768	DB00555	-	-
P02768	DB00554	-	-
P02768	DB01174	-	-
P02768	DB00550	-	-
P02768	DB00712	-	-
P02768	DB01026	-	-
P02768	DB00959	-	-
P02768	DB00489	-	-
P02768	DB00613	-	-
P02768	DB00508	-	-
P02768	DB00503	-	-
P02768	DB00500	-	-
P02768	DB00747	-	-
P02768	DB00741	-	-
P02768	DB01103	-	-
P02768	DB00465	-	-
P02768	DB01051	-	-
P02768	DB01050	-	-
P02768	DB01627	-	-
P02768	DB01059	-	-
P02768	DB00469	-	-
P02768	DB00468	-	-
P02768	DB00695	-	-
P02768	DB00682	-	-
P02768	DB00358	-	-
P02768	DB00199	-	-
P02768	DB00983	-	-
P02768	DB01580	-	-
P02768	DB00861	-	-
P02768	DB00598	-	-
P02768	DB00863	-	-
P02768	DB00201	-	-
P02768	DB00866	-	-
P02768	DB01112	-	-
P02768	DB01203	-	-
P02768	DB00773	-	-
P02768	DB00493	-	-
P02768	DB00476	-	-
P02768	DB00477	-	-
P02768	DB00661	-	-
P02768	DB00860	-	-
P02768	DB01193	-	-
P02768	DB00575	-	-
P02768	DB01197	-	-
P02768	DB00669	-	-
P02768	DB00266	-	-
P02768	DB00264	-	-
P02768	DB00341	-	-
P02768	DB00672	-	-
P02768	DB00586	-	-
P02768	DB00675	-	-
P02768	DB00635	-	-
P02768	DB00636	-	-
P02768	DB00619	-	-
P02768	DB00721	-	-
P02768	DB01124	-	-
P02768	DB01232	-	-
P02768	DB01234	-	-
P02768	DB00446	-	-
P02768	DB00445	-	-
P02768	DB00335	-	-
P02768	DB00440	-	-
P02768	DB01274	-	-
P02768	DB00443	-	-
P02768	DB01087	-	-
P02768	DB01045	-	-
P02768	DB00904	-	-
P02768	DB01137	-	-
P02768	DB00608	-	-
P02768	DB00512	-	-
P02768	DB00281	-	-
P02768	DB08828	-	-
P02768	DB00908	-	-
P02768	DB00458	-	-
P02768	DB00328	-	-
P02768	DB00450	-	-
P02768	DB01346	-	-
P02768	DB00759	-	-
P02768	DB01151	-	-
P02768	DB01435	-	-
P02768	DB00457	-	-
P02768	DB00999	-	-
P02768	DB00997	-	-
P02768	DB00857	-	-
P02768	DB06777	-	-

## Sheet: Enzymes
Protein	Drug name	Plant source	Plant compound
P16662	-	TAXID:49827	Dihydrotestosterone
P16662	-	TAXID:4565	Sodium Diethyldithiocarbamate
P16662	-	TAXID:4442	P-Nitrophenol
P16662	-	TAXID:4498	Bilirubin
P16662	-	TAXID:4081	Serotonin
P16662	-	TAXID:48038	Bilirubin
P16662	-	TAXID:94328	Serotonin
P16662	-	TAXID:94328	Borneol
P16662	-	TAXID:4236	Ethinyl Estradiol
P16662	-	TAXID:4236	Borneol
P16662	-	TAXID:3469	Codeine
P16662	-	TAXID:151069	Menthol
P16662	-	TAXID:3726	Bilirubin
P16662	-	TAXID:33125	Carbamazepine
P16662	-	TAXID:4113	Serotonin
P16662	-	TAXID:4222	Serotonin
P16662	DB00818	-	-
P16662	DB04573	-	-
P16662	DB00153	-	-
P16662	DB00783	-	-
P16662	DB00977	-	-
P16662	DB00788	-	-
P16662	DB00295	-	-
P16662	DB00564	-	-
P16662	DB00741	-	-
P16662	DB01600	-	-
P16662	DB01050	-	-
P16662	DB00446	-	-
P16662	DB01183	-	-
P16662	DB00704	-	-
P16662	DB00445	-	-
P16662	DB00255	-	-
P16662	DB00313	-	-
P16662	DB00316	-	-
P16662	DB00988	-	-
P16662	DB00231	-	-
P16662	DB00318	-	-
P16662	DB00973	-	-
P16662	DB00712	-	-
P16662	DB00495	-	-
P16662	DB00861	-	-
P16662	DB00844	-	-
P16662	DB00864	-	-
P16662	DB00825	-	-
P16662	DB00842	-	-
P16662	DB01136	-	-
P16662	DB00655	-	-
P16662	DB00163	-	-
P16662	DB00921	-	-
P16662	DB00624	-	-
P16662	DB01009	-	-
P16662	DB00328	-	-
P16662	DB01192	-	-
P16662	DB00573	-	-
P16662	DB00327	-	-
P16662	DB00571	-	-
P16662	DB00997	-	-
P16662	DB00586	-	-
P16662	DB00091	-	-
P16662	DB00854	-	-
P21397	-	TAXID:4045	Xanthotoxin
P21397	-	TAXID:48038	Xanthotoxin
P21397	-	TAXID:4047	Xanthotoxin
P21397	-	TAXID:4041	Xanthotoxin
P21397	-	TAXID:3494	Xanthotoxin
P21397	-	TAXID:78168	Harmine
P21397	-	TAXID:3649	Xanthotoxin
P21397	-	TAXID:33125	Isatin
P21397	-	TAXID:94328	Xanthotoxin
P21397	DB01064	-	-
P21397	DB01097	-	-
P21397	DB00153	-	-
P21397	DB00709	-	-
P21397	DB00258	-	-
P21397	DB00259	-	-
P21397	DB00252	-	-
P21397	DB00701	-	-
P21397	DB00251	-	-
P21397	DB00704	-	-
P21397	DB00257	-	-
P21397	DB00254	-	-
P21397	DB00255	-	-
P21397	DB00313	-	-
P21397	DB00310	-	-
P21397	DB00316	-	-
P21397	DB00091	-	-
P21397	DB00319	-	-
P21397	DB00478	-	-
P21397	DB00570	-	-
P21397	DB00882	-	-
P21397	DB01156	-	-
P21397	DB00184	-	-
P21397	DB01151	-	-
P21397	DB00650	-	-
P21397	DB00227	-	-
P21397	DB00224	-	-
P21397	DB00222	-	-
P21397	DB00220	-	-
P21397	DB00962	-	-
P21397	DB06710	-	-
P21397	DB03255	-	-
P21397	DB00178	-	-
P21397	DB00170	-	-
P21397	DB01075	-	-
P21397	DB01074	-	-
P21397	DB01077	-	-
P21397	DB01076	-	-
P21397	DB00671	-	-
P21397	DB00672	-	-
P21397	DB00674	-	-
P21397	DB00675	-	-
P21397	DB00679	-	-
P21397	DB01275	-	-
P21397	DB00795	-	-
P21397	DB00794	-	-
P21397	DB00793	-	-
P21397	DB00823	-	-
P21397	DB00822	-	-
P21397	DB00415	-	-
P21397	DB00829	-	-
P21397	DB00411	-	-
P21397	DB00412	-	-
P21397	DB00798	-	-
P21397	DB00555	-	-
P21397	DB00554	-	-
P21397	DB00550	-	-
P21397	DB00553	-	-
P21397	DB01576	-	-
P21397	DB00959	-	-
P21397	DB00489	-	-
P21397	DB00488	-	-
P21397	DB00483	-	-
P21397	DB00950	-	-
P21397	DB00481	-	-
P21397	DB00487	-	-
P21397	DB00484	-	-
P21397	DB01103	-	-
P21397	DB01105	-	-
P21397	DB01104	-	-
P21397	DB00214	-	-
P21397	DB00215	-	-
P21397	DB00359	-	-
P21397	DB00357	-	-
P21397	DB00356	-	-
P21397	DB00353	-	-
P21397	DB00350	-	-
P21397	DB01208	-	-
P21397	DB01203	-	-
P21397	DB01200	-	-
P21397	DB01201	-	-
P21397	DB01611	-	-
P21397	DB01204	-	-
P21397	DB01205	-	-
P21397	DB01199	-	-
P21397	DB01193	-	-
P21397	DB01190	-	-
P21397	DB01191	-	-
P21397	DB01197	-	-
P21397	DB01299	-	-
P21397	DB00915	-	-
P21397	DB00384	-	-
P21397	DB00916	-	-
P21397	DB00911	-	-
P21397	DB00529	-	-
P21397	DB00524	-	-
P21397	DB00525	-	-
P21397	DB00919	-	-
P21397	DB00523	-	-
P21397	DB01035	-	-
P21397	DB01037	-	-
P21397	DB01408	-	-
P21397	DB01030	-	-
P21397	DB01032	-	-
P21397	DB01406	-	-
P21397	DB01407	-	-
P21397	DB01400	-	-
P21397	DB00846	-	-
P21397	DB01039	-	-
P21397	DB00951	-	-
P21397	DB00421	-	-
P21397	DB00285	-	-
P21397	DB00284	-	-
P21397	DB00281	-	-
P21397	DB00283	-	-
P21397	DB00389	-	-
P21397	DB00752	-	-
P21397	DB00328	-	-
P21397	DB00750	-	-
P21397	DB00756	-	-
P21397	DB00755	-	-
P21397	DB00322	-	-
P21397	DB00320	-	-
P21397	DB00758	-	-
P21397	DB00455	-	-
P21397	DB00324	-	-
P21397	DB00457	-	-
P21397	DB04571	-	-
P21397	DB00859	-	-
P21397	DB00857	-	-
P21397	DB00850	-	-
P21397	DB00851	-	-
P21397	DB00780	-	-
P21397	DB00428	-	-
P21397	DB00834	-	-
P21397	DB00783	-	-
P21397	DB00784	-	-
P21397	DB00939	-	-
P21397	DB00831	-	-
P21397	DB00393	-	-
P21397	DB00789	-	-
P21397	DB00935	-	-
P21397	DB00390	-	-
P21397	DB00424	-	-
P21397	DB00394	-	-
P21397	DB00547	-	-
P21397	DB00544	-	-
P21397	DB00542	-	-
P21397	DB00543	-	-
P21397	DB00540	-	-
P21397	DB01018	-	-
P21397	DB01016	-	-
P21397	DB01015	-	-
P21397	DB01014	-	-
P21397	DB01011	-	-
P21397	DB00549	-	-
P21397	DB00233	-	-
P21397	DB00495	-	-
P21397	DB00490	-	-
P21397	DB00493	-	-
P21397	DB08826	-	-
P21397	DB00498	-	-
P21397	DB00499	-	-
P21397	DB00321	-	-
P21397	DB00945	-	-
P21397	DB00734	-	-
P21397	DB00731	-	-
P21397	DB00309	-	-
P21397	DB00733	-	-
P21397	DB00305	-	-
P21397	DB00738	-	-
P21397	DB00302	-	-
P21397	DB01606	-	-
P21397	DB01602	-	-
P21397	DB01167	-	-
P21397	DB01166	-	-
P21397	DB01165	-	-
P21397	DB01162	-	-
P21397	DB00426	-	-
P21397	DB01229	-	-
P21397	DB01287	-	-
P21397	DB06697	-	-
P21397	DB01068	-	-
P21397	DB01069	-	-
P21397	DB00649	-	-
P21397	DB00648	-	-
P21397	DB00162	-	-
P21397	DB00163	-	-
P21397	DB01062	-	-
P21397	DB01060	-	-
P21397	DB01061	-	-
P21397	DB00641	-	-
P21397	DB01067	-	-
P21397	DB00643	-	-
P21397	DB01065	-	-
P21397	DB01357	-	-
P21397	DB00749	-	-
P21397	DB00298	-	-
P21397	DB00744	-	-
P21397	DB00297	-	-
P21397	DB00295	-	-
P21397	DB00740	-	-
P21397	DB00741	-	-
P21397	DB00742	-	-
P21397	DB00291	-	-
P21397	DB00465	-	-
P21397	DB00450	-	-
P21397	DB00467	-	-
P21397	DB00461	-	-
P21397	DB00462	-	-
P21397	DB00469	-	-
P21397	DB00452	-	-
P21397	DB00196	-	-
P21397	DB00190	-	-
P21397	DB00193	-	-
P21397	DB00199	-	-
P21397	DB00861	-	-
P21397	DB00860	-	-
P21397	DB00863	-	-
P21397	DB00325	-	-
P21397	DB00864	-	-
P21397	DB01112	-	-
P21397	DB01113	-	-
P21397	DB01110	-	-
P21397	DB01114	-	-
P21397	DB01115	-	-
P21397	DB00177	-	-
P21397	DB01118	-	-
P21397	DB01119	-	-
P21397	DB00175	-	-
P21397	DB00263	-	-
P21397	DB00262	-	-
P21397	DB00266	-	-
P21397	DB00265	-	-
P21397	DB00264	-	-
P21397	DB00342	-	-
P21397	DB00343	-	-
P21397	DB00347	-	-
P21397	DB00635	-	-
P21397	DB00636	-	-
P21397	DB00637	-	-
P21397	DB00630	-	-
P21397	DB01233	-	-
P21397	DB01232	-	-
P21397	DB01231	-	-
P21397	DB01235	-	-
P21397	DB01234	-	-
P21397	DB00518	-	-
P21397	DB00904	-	-
P21397	DB01595	-	-
P21397	DB00903	-	-
P21397	DB00513	-	-
P21397	DB00512	-	-
P21397	DB00515	-	-
P21397	DB00514	-	-
P21397	DB00909	-	-
P21397	DB01026	-	-
P21397	DB00688	-	-
P21397	DB00122	-	-
P21397	DB01023	-	-
P21397	DB00126	-	-
P21397	DB01021	-	-
P21397	DB00681	-	-
P21397	DB00682	-	-
P21397	DB01435	-	-
P21397	DB00684	-	-
P21397	DB01436	-	-
P21397	DB00999	-	-
P21397	DB00995	-	-
P21397	DB00994	-	-
P21397	DB00997	-	-
P21397	DB00996	-	-
P21397	DB00991	-	-
P21397	DB04552	-	-
P21397	DB04573	-	-
P21397	DB00836	-	-
P21397	DB01095	-	-
P21397	DB01092	-	-
P21397	DB01091	-	-
P21397	DB00656	-	-
P21397	DB00655	-	-
P21397	DB00652	-	-
P21397	DB01099	-	-
P21397	DB00651	-	-
P21397	DB01253	-	-
P21397	DB00166	-	-
P21397	DB00788	-	-
P21397	DB00420	-	-
P21397	DB01380	-	-
P21397	DB00423	-	-
P21397	DB00928	-	-
P21397	DB00841	-	-
P21397	DB00934	-	-
P21397	DB00381	-	-
P21397	DB00382	-	-
P21397	DB00844	-	-
P21397	DB00920	-	-
P21397	DB00433	-	-
P21397	DB00848	-	-
P21397	DB00437	-	-
P21397	DB00434	-	-
P21397	DB00396	-	-
P21397	DB01008	-	-
P21397	DB01009	-	-
P21397	DB00531	-	-
P21397	DB00537	-	-
P21397	DB01001	-	-
P21397	DB01002	-	-
P21397	DB01003	-	-
P21397	DB01005	-	-
P21397	DB01006	-	-
P21397	DB00541	-	-
P21397	DB00279	-	-
P21397	DB00274	-	-
P21397	DB00418	-	-
P21397	DB00277	-	-
P21397	DB00271	-	-
P21397	DB00376	-	-
P21397	DB00373	-	-
P21397	DB00379	-	-
P21397	DB06150	-	-
P21397	DB01171	-	-
P21397	DB01172	-	-
P21397	DB01173	-	-
P21397	DB01174	-	-
P21397	DB01175	-	-
P21397	DB01176	-	-
P21397	DB01177	-	-
P21397	DB01179	-	-
P21397	DB00970	-	-
P21397	DB00977	-	-
P21397	DB00975	-	-
P21397	DB00502	-	-
P21397	DB00503	-	-
P21397	DB00500	-	-
P21397	DB00978	-	-
P21397	DB01581	-	-
P21397	DB01582	-	-
P21397	DB01053	-	-
P21397	DB00698	-	-
P21397	DB01050	-	-
P21397	DB01056	-	-
P21397	DB01055	-	-
P21397	DB01054	-	-
P21397	DB00692	-	-
P21397	DB01351	-	-
P21397	DB01059	-	-
P21397	DB01058	-	-
P21397	DB00696	-	-
P21397	DB01427	-	-
P21397	DB00694	-	-
P21397	DB00695	-	-
P21397	DB00987	-	-
P21397	DB00982	-	-
P21397	DB00981	-	-
P21397	DB00591	-	-
P21397	DB00590	-	-
P21397	DB00593	-	-
P21397	DB00595	-	-
P21397	DB00598	-	-
P21397	DB00778	-	-
P21397	DB00809	-	-
P21397	DB00808	-	-
P21397	DB00807	-	-
P21397	DB00806	-	-
P21397	DB00773	-	-
P21397	DB00804	-	-
P21397	DB00802	-	-
P21397	DB00776	-	-
P21397	DB00477	-	-
P21397	DB00472	-	-
P21397	DB00471	-	-
P21397	DB00577	-	-
P21397	DB00576	-	-
P21397	DB00575	-	-
P21397	DB00573	-	-
P21397	DB00572	-	-
P21397	DB00571	-	-
P21397	DB00479	-	-
P21397	DB00186	-	-
P21397	DB00187	-	-
P21397	DB00169	-	-
P21397	DB00182	-	-
P21397	DB00180	-	-
P21397	DB00181	-	-
P21397	DB00871	-	-
P21397	DB00877	-	-
P21397	DB00874	-	-
P21397	DB01128	-	-
P21397	DB01121	-	-
P21397	DB01120	-	-
P21397	DB01127	-	-
P21397	DB01125	-	-
P21397	DB00330	-	-
P21397	DB00238	-	-
P21397	DB00239	-	-
P21397	DB00443	-	-
P21397	DB00145	-	-
P21397	DB00235	-	-
P21397	DB00440	-	-
P21397	DB00601	-	-
P21397	DB00600	-	-
P21397	DB00602	-	-
P21397	DB00604	-	-
P21397	DB01224	-	-
P21397	DB01221	-	-
P21397	DB01222	-	-
P21397	DB01223	-	-
P21397	DB00898	-	-
P21397	DB00482	-	-
P21397	DB00936	-	-
P21397	DB01339	-	-
P21397	DB00730	-	-
P21397	DB00391	-	-
P21397	DB01148	-	-
P21397	DB01144	-	-
P21397	DB01147	-	-
P21397	DB01143	-	-
P21397	DB01142	-	-
P21397	DB01082	-	-
P21397	DB00839	-	-
P21397	DB01086	-	-
P21397	DB01087	-	-
P21397	DB00623	-	-
P21397	DB00620	-	-
P21397	DB00627	-	-
P21397	DB01324	-	-
P21397	DB01327	-	-
P21397	DB00624	-	-
P21397	DB01242	-	-
P21397	DB01241	-	-
P21397	DB01248	-	-
P21397	DB01394	-	-
P21397	DB01396	-	-
P21397	DB06148	-	-
P21397	DB01392	-	-
P21397	DB01393	-	-
P21397	DB06147	-	-
P21397	DB01399	-	-
P21397	DB00818	-	-
P21397	DB00819	-	-
P21397	DB00762	-	-
P21397	DB00763	-	-
P21397	DB00812	-	-
P21397	DB00813	-	-
P21397	DB00814	-	-
P21397	DB00765	-	-
P21397	DB00568	-	-
P21397	DB00401	-	-
P21397	DB00400	-	-
P21397	DB00406	-	-
P21397	DB00404	-	-
P21397	DB00561	-	-
P21397	DB00563	-	-
P21397	DB00564	-	-
P21397	DB04841	-	-
P21397	DB00567	-	-
P21397	DB00759	-	-
P21397	DB01426	-	-
P21397	DB00884	-	-
P21397	DB00968	-	-
P21397	DB00969	-	-
P21397	DB00881	-	-
P21397	DB00967	-	-
P21397	DB00960	-	-
P21397	DB00961	-	-
P21397	DB00889	-	-
P21397	DB00963	-	-
P21397	DB06729	-	-
P21397	DB00249	-	-
P21397	DB00717	-	-
P21397	DB00715	-	-
P21397	DB00242	-	-
P21397	DB00245	-	-
P21397	DB00712	-	-
P21397	DB00247	-	-
P21397	DB00367	-	-
P21397	DB00365	-	-
P21397	DB00363	-	-
P21397	DB00361	-	-
P21397	DB01024	-	-
P21397	DB03166	-	-
P21397	DB00614	-	-
P21397	DB00615	-	-
P21397	DB01211	-	-
P21397	DB01210	-	-
P21397	DB01213	-	-
P21397	DB00619	-	-
P21397	DB01217	-	-
P21397	DB01216	-	-
P21397	DB06698	-	-
P21397	DB01188	-	-
P21397	DB01626	-	-
P21397	DB01627	-	-
P21397	DB01181	-	-
P21397	DB06691	-	-
P21397	DB01183	-	-
P21397	DB01182	-	-
P21397	DB01184	-	-
P21397	DB01186	-	-
P21397	DB00685	-	-
P21397	DB00811	-	-
P21397	DB01029	-	-
P21397	DB00760	-	-
P21397	DB08807	-	-
P21397	DB04838	-	-
P21397	DB01599	-	-
P21397	DB01044	-	-
P21397	DB01045	-	-
P21397	DB00104	-	-
P21397	DB01047	-	-
P21397	DB01041	-	-
P21397	DB01042	-	-
P21397	DB01367	-	-
P21397	DB00661	-	-
P21397	DB00669	-	-
P21397	DB00668	-	-
P21397	DB00583	-	-
P21397	DB00586	-	-
P21397	DB00584	-	-
P21397	DB00585	-	-
P21397	DB08797	-	-
P21397	DB00589	-	-
P21397	DB00339	-	-
P21397	DB00724	-	-
P21397	DB00725	-	-
P21397	DB00722	-	-
P21397	DB00721	-	-
P21397	DB00331	-	-
P21397	DB00446	-	-
P21397	DB00445	-	-
P21397	DB00335	-	-
P21397	DB00334	-	-
P21397	DB00441	-	-
P21397	DB00336	-	-
P21397	DB01168	-	-
P21397	DB01136	-	-
P21397	DB01137	-	-
P21397	DB01132	-	-
P21397	DB01206	-	-
P21397	DB00207	-	-
P21397	DB00206	-	-
P21397	DB00201	-	-
P21397	DB00202	-	-
P21397	DB00208	-	-
P21397	DB06770	-	-
P54855	-	TAXID:65948	Apigenin
P54855	-	TAXID:74900	Quercetin
P54855	-	TAXID:4081	Quercetin
P54855	-	TAXID:4081	Serotonin
P54855	-	TAXID:4442	Fisetin
P54855	-	TAXID:4442	Apigenin
P54855	-	TAXID:4442	Quercetin
P54855	-	TAXID:4577	Quercetin
P54855	-	TAXID:36610	Apigenin
P54855	-	TAXID:36610	Quercetin
P54855	-	TAXID:114280	Quercetin
P54855	-	TAXID:85571	Naringin
P54855	-	TAXID:4679	Quercetin
P54855	-	TAXID:4047	Quercetin
P54855	-	TAXID:4047	Carvacrol
P54855	-	TAXID:78168	Apigenin
P54855	-	TAXID:4530	Quercetin
P54855	-	TAXID:4530	Ferulate
P54855	-	TAXID:55513	Carvacrol
P54855	-	TAXID:4681	Quercetin
P54855	-	TAXID:175228	Quercetin
P54855	-	TAXID:89151	Apigenin
P54855	-	TAXID:4146	Apigenin
P54855	-	TAXID:4146	Quercetin
P54855	-	TAXID:3469	Quercetin
P54855	-	TAXID:3469	Codeine
P54855	-	TAXID:29760	Quercetin
P54855	-	TAXID:29780	Quercetin
P54855	-	TAXID:3617	Quercetin
P54855	-	TAXID:3708	Quercetin
P54855	-	TAXID:3708	Ferulate
P54855	-	TAXID:120290	Quercetin
P54855	-	TAXID:32247	Quercetin
P54855	-	TAXID:4682	Quercetin
P54855	-	TAXID:4682	Carvacrol
P54855	-	TAXID:4045	Apigenin
P54855	-	TAXID:4045	Carvacrol
P54855	-	TAXID:4045	Ferulate
P54855	-	TAXID:4045	Quercetin
P54855	-	TAXID:35925	Quercetin
P54855	-	TAXID:3747	Quercetin
P54855	-	TAXID:3747	Naringin
P54855	-	TAXID:3888	Quercetin
P54855	-	TAXID:3888	Naringin
P54855	-	TAXID:4565	Quercetin
P54855	-	TAXID:94328	Apigenin
P54855	-	TAXID:94328	Carvacrol
P54855	-	TAXID:94328	Serotonin
P54855	-	TAXID:94328	Borneol
P54855	-	TAXID:4236	Quercetin
P54855	-	TAXID:4236	Ethinyl Estradiol
P54855	-	TAXID:4236	Borneol
P54855	-	TAXID:151069	Menthol
P54855	-	TAXID:50225	Quercetin
P54855	-	TAXID:3885	Quercetin
P54855	-	TAXID:4072	Apigenin
P54855	-	TAXID:4072	Quercetin
P54855	-	TAXID:180772	Quercetin
P54855	-	TAXID:13427	Quercetin
P54855	-	TAXID:4222	Quercetin
P54855	-	TAXID:4222	Serotonin
P54855	-	TAXID:48038	Quercetin
P54855	-	TAXID:48038	Carvacrol
P54855	-	TAXID:74645	Quercetin
P54855	-	TAXID:22663	Quercetin
P54855	-	TAXID:3847	Apigenin
P54855	-	TAXID:3847	Quercetin
P54855	-	TAXID:3711	Quercetin
P54855	-	TAXID:3659	Quercetin
P54855	-	TAXID:3712	Quercetin
P54855	-	TAXID:4113	Serotonin
P54855	DB04573	-	-
P54855	DB00818	-	-
P54855	DB00509	-	-
P54855	DB00977	-	-
P54855	DB00295	-	-
P54855	DB00741	-	-
P54855	DB00783	-	-
P54855	DB00279	-	-
P54855	DB00323	-	-
P54855	DB00446	-	-
P54855	DB01183	-	-
P54855	DB00704	-	-
P54855	DB00255	-	-
P54855	DB00313	-	-
P54855	DB00887	-	-
P54855	DB00316	-	-
P54855	DB00988	-	-
P54855	DB00318	-	-
P54855	DB00494	-	-
P54855	DB00497	-	-
P54855	DB00825	-	-
P54855	DB00842	-	-
P54855	DB00655	-	-
P54855	DB00792	-	-
P54855	DB00921	-	-
P54855	DB00434	-	-
P54855	DB00624	-	-
P54855	DB00458	-	-
P54855	DB00451	-	-
P54855	DB00890	-	-
P54855	DB00586	-	-
P54855	DB00854	-	-
P16083	-	TAXID:3711	Resveratrol
P16083	-	TAXID:4565	Resveratrol
P16083	-	TAXID:180772	Resveratrol
P16083	-	TAXID:3818	Resveratrol
P16083	-	TAXID:29760	Resveratrol
P16083	-	TAXID:3621	Resveratrol
P16083	-	TAXID:4081	Resveratrol
P16083	-	TAXID:175228	Resveratrol
P16083	-	TAXID:4442	Resveratrol
P16083	-	TAXID:3747	Resveratrol
P16083	DB01087	-	-
P16083	DB00608	-	-
P16083	DB00619	-	-
P16083	DB01065	-	-
P16083	DB01162	-	-
P16083	DB00457	-	-
Q06278	-	TAXID:4442	Genistein
Q06278	-	TAXID:3847	Genistein
Q06278	-	TAXID:4236	Ethinyl Estradiol
Q06278	DB01103	-	-
Q06278	DB00783	-	-
Q06278	DB00977	-	-
Q06278	DB00147	-	-
Q06278	DB00170	-	-
Q06278	DB00477	-	-
Q06278	DB00276	-	-
Q06278	DB00850	-	-
Q06278	DB00481	-	-
Q06278	DB00962	-	-
Q06278	DB00255	-	-
P04798	-	TAXID:3760	Hesperetin
P04798	-	TAXID:3621	Physcion
P04798	-	TAXID:4442	Hesperetin
P04798	-	TAXID:4146	Diosmetin
P04798	-	TAXID:85571	Sinensetin
P04798	DB01094	-	-
P04798	DB00316	-	-
P35354	-	TAXID:29760	Quercetin
P35354	-	TAXID:29760	Resveratrol
P35354	-	TAXID:74900	Quercetin
P35354	-	TAXID:74900	Kaempferol
P35354	-	TAXID:175228	Quercetin
P35354	-	TAXID:175228	Resveratrol
P35354	-	TAXID:4081	Quercetin
P35354	-	TAXID:4081	Resveratrol
P35354	-	TAXID:4442	Quercetin
P35354	-	TAXID:4442	Resveratrol
P35354	-	TAXID:4442	Kaempferol
P35354	-	TAXID:4577	Quercetin
P35354	-	TAXID:4577	Kaempferol
P35354	-	TAXID:36610	Quercetin
P35354	-	TAXID:36610	Kaempferol
P35354	-	TAXID:3712	Quercetin
P35354	-	TAXID:3712	Kaempferol
P35354	-	TAXID:114280	Quercetin
P35354	-	TAXID:4045	Quercetin
P35354	-	TAXID:4045	Kaempferol
P35354	-	TAXID:4679	Quercetin
P35354	-	TAXID:4679	Kaempferol
P35354	-	TAXID:4047	Quercetin
P35354	-	TAXID:4047	Kaempferol
P35354	-	TAXID:4530	Quercetin
P35354	-	TAXID:4530	Kaempferol
P35354	-	TAXID:3847	Quercetin
P35354	-	TAXID:3847	Kaempferol
P35354	-	TAXID:4146	Quercetin
P35354	-	TAXID:4146	Kaempferol
P35354	-	TAXID:3469	Quercetin
P35354	-	TAXID:3469	Kaempferol
P35354	-	TAXID:3621	Resveratrol
P35354	-	TAXID:29780	Quercetin
P35354	-	TAXID:29780	Kaempferol
P35354	-	TAXID:3708	Quercetin
P35354	-	TAXID:3708	Kaempferol
P35354	-	TAXID:49827	Nordihydroguaiaretic Acid
P35354	-	TAXID:32247	Quercetin
P35354	-	TAXID:32247	Kaempferol
P35354	-	TAXID:4682	Quercetin
P35354	-	TAXID:3818	Resveratrol
P35354	-	TAXID:3983	Pinoresinol
P35354	-	TAXID:3983	Scopoletin
P35354	-	TAXID:4681	Quercetin
P35354	-	TAXID:4681	Kaempferol
P35354	-	TAXID:3747	Quercetin
P35354	-	TAXID:3747	Resveratrol
P35354	-	TAXID:3747	Kaempferol
P35354	-	TAXID:35925	Quercetin
P35354	-	TAXID:35925	Kaempferol
P35354	-	TAXID:3888	Quercetin
P35354	-	TAXID:3888	Kaempferol
P35354	-	TAXID:4565	Quercetin
P35354	-	TAXID:4565	Resveratrol
P35354	-	TAXID:4072	Quercetin
P35354	-	TAXID:4072	4-Methoxyhonokiol
P35354	-	TAXID:4236	Quercetin
P35354	-	TAXID:151069	Kaempferol
P35354	-	TAXID:41241	Cinnamtannin B1
P35354	-	TAXID:3885	Quercetin
P35354	-	TAXID:3617	Quercetin
P35354	-	TAXID:180772	Cinnamtannin B1
P35354	-	TAXID:180772	Quercetin
P35354	-	TAXID:180772	Resveratrol
P35354	-	TAXID:180772	Kaempferol
P35354	-	TAXID:13427	Quercetin
P35354	-	TAXID:13427	Scopoletin
P35354	-	TAXID:4222	Quercetin
P35354	-	TAXID:4498	Scopoletin
P35354	-	TAXID:48038	Quercetin
P35354	-	TAXID:48038	Kaempferol
P35354	-	TAXID:120290	Quercetin
P35354	-	TAXID:120290	Kaempferol
P35354	-	TAXID:74645	Quercetin
P35354	-	TAXID:74645	Kaempferol
P35354	-	TAXID:22663	Quercetin
P35354	-	TAXID:4006	Pinoresinol
P35354	-	TAXID:3711	Quercetin
P35354	-	TAXID:3711	Resveratrol
P35354	-	TAXID:3711	Kaempferol
P35354	-	TAXID:3659	Quercetin
P35354	-	TAXID:3659	Kaempferol
P35354	-	TAXID:50225	Quercetin
P35354	DB01064	-	-
P35354	DB01097	-	-
P35354	DB00153	-	-
P35354	DB00709	-	-
P35354	DB00258	-	-
P35354	DB00259	-	-
P35354	DB00252	-	-
P35354	DB00701	-	-
P35354	DB00251	-	-
P35354	DB00704	-	-
P35354	DB00257	-	-
P35354	DB00254	-	-
P35354	DB00255	-	-
P35354	DB00313	-	-
P35354	DB00310	-	-
P35354	DB00316	-	-
P35354	DB00091	-	-
P35354	DB00319	-	-
P35354	DB00478	-	-
P35354	DB00570	-	-
P35354	DB00882	-	-
P35354	DB01156	-	-
P35354	DB01151	-	-
P35354	DB00650	-	-
P35354	DB00227	-	-
P35354	DB00224	-	-
P35354	DB00222	-	-
P35354	DB00220	-	-
P35354	DB00962	-	-
P35354	DB06710	-	-
P35354	DB00179	-	-
P35354	DB00178	-	-
P35354	DB01075	-	-
P35354	DB00166	-	-
P35354	DB01077	-	-
P35354	DB01076	-	-
P35354	DB00672	-	-
P35354	DB00674	-	-
P35354	DB00675	-	-
P35354	DB00679	-	-
P35354	DB01275	-	-
P35354	DB00825	-	-
P35354	DB00795	-	-
P35354	DB00794	-	-
P35354	DB00793	-	-
P35354	DB00823	-	-
P35354	DB00822	-	-
P35354	DB00415	-	-
P35354	DB00829	-	-
P35354	DB00411	-	-
P35354	DB00412	-	-
P35354	DB00798	-	-
P35354	DB00555	-	-
P35354	DB00554	-	-
P35354	DB00550	-	-
P35354	DB00553	-	-
P35354	DB00959	-	-
P35354	DB00489	-	-
P35354	DB00488	-	-
P35354	DB00483	-	-
P35354	DB00482	-	-
P35354	DB00481	-	-
P35354	DB00487	-	-
P35354	DB00484	-	-
P35354	DB01103	-	-
P35354	DB01105	-	-
P35354	DB01104	-	-
P35354	DB00214	-	-
P35354	DB00215	-	-
P35354	DB00359	-	-
P35354	DB00357	-	-
P35354	DB00356	-	-
P35354	DB00353	-	-
P35354	DB00350	-	-
P35354	DB01208	-	-
P35354	DB01203	-	-
P35354	DB01200	-	-
P35354	DB01201	-	-
P35354	DB01611	-	-
P35354	DB01204	-	-
P35354	DB01205	-	-
P35354	DB01199	-	-
P35354	DB01193	-	-
P35354	DB01190	-	-
P35354	DB01191	-	-
P35354	DB01197	-	-
P35354	DB01299	-	-
P35354	DB00915	-	-
P35354	DB00384	-	-
P35354	DB00917	-	-
P35354	DB00916	-	-
P35354	DB00911	-	-
P35354	DB00529	-	-
P35354	DB00524	-	-
P35354	DB00525	-	-
P35354	DB00919	-	-
P35354	DB00523	-	-
P35354	DB01035	-	-
P35354	DB01037	-	-
P35354	DB01408	-	-
P35354	DB01030	-	-
P35354	DB01032	-	-
P35354	DB01406	-	-
P35354	DB01407	-	-
P35354	DB01400	-	-
P35354	DB00846	-	-
P35354	DB01039	-	-
P35354	DB00951	-	-
P35354	DB00421	-	-
P35354	DB00285	-	-
P35354	DB00284	-	-
P35354	DB00281	-	-
P35354	DB00283	-	-
P35354	DB00389	-	-
P35354	DB00328	-	-
P35354	DB00750	-	-
P35354	DB00756	-	-
P35354	DB00755	-	-
P35354	DB00322	-	-
P35354	DB00320	-	-
P35354	DB00758	-	-
P35354	DB00455	-	-
P35354	DB00324	-	-
P35354	DB00457	-	-
P35354	DB04571	-	-
P35354	DB00859	-	-
P35354	DB00857	-	-
P35354	DB00850	-	-
P35354	DB00851	-	-
P35354	DB00780	-	-
P35354	DB00428	-	-
P35354	DB00834	-	-
P35354	DB00783	-	-
P35354	DB00784	-	-
P35354	DB00939	-	-
P35354	DB00831	-	-
P35354	DB00788	-	-
P35354	DB00789	-	-
P35354	DB00935	-	-
P35354	DB00390	-	-
P35354	DB00424	-	-
P35354	DB00394	-	-
P35354	DB00547	-	-
P35354	DB00544	-	-
P35354	DB00542	-	-
P35354	DB00543	-	-
P35354	DB00540	-	-
P35354	DB01018	-	-
P35354	DB01016	-	-
P35354	DB01015	-	-
P35354	DB01014	-	-
P35354	DB01011	-	-
P35354	DB00549	-	-
P35354	DB00233	-	-
P35354	DB00495	-	-
P35354	DB00490	-	-
P35354	DB00493	-	-
P35354	DB08826	-	-
P35354	DB00498	-	-
P35354	DB00499	-	-
P35354	DB00321	-	-
P35354	DB00945	-	-
P35354	DB03255	-	-
P35354	DB00734	-	-
P35354	DB00731	-	-
P35354	DB00309	-	-
P35354	DB00733	-	-
P35354	DB00305	-	-
P35354	DB00738	-	-
P35354	DB00302	-	-
P35354	DB01606	-	-
P35354	DB01167	-	-
P35354	DB01166	-	-
P35354	DB01165	-	-
P35354	DB01162	-	-
P35354	DB00426	-	-
P35354	DB01168	-	-
P35354	DB01628	-	-
P35354	DB01283	-	-
P35354	DB01287	-	-
P35354	DB06697	-	-
P35354	DB01068	-	-
P35354	DB01069	-	-
P35354	DB00649	-	-
P35354	DB00648	-	-
P35354	DB00163	-	-
P35354	DB01062	-	-
P35354	DB01060	-	-
P35354	DB01061	-	-
P35354	DB00641	-	-
P35354	DB01067	-	-
P35354	DB00643	-	-
P35354	DB01065	-	-
P35354	DB01357	-	-
P35354	DB00749	-	-
P35354	DB00298	-	-
P35354	DB00744	-	-
P35354	DB00297	-	-
P35354	DB00747	-	-
P35354	DB00740	-	-
P35354	DB00741	-	-
P35354	DB00742	-	-
P35354	DB00291	-	-
P35354	DB00465	-	-
P35354	DB00450	-	-
P35354	DB00467	-	-
P35354	DB00461	-	-
P35354	DB00462	-	-
P35354	DB00469	-	-
P35354	DB00452	-	-
P35354	DB00196	-	-
P35354	DB00190	-	-
P35354	DB00193	-	-
P35354	DB00199	-	-
P35354	DB00861	-	-
P35354	DB00860	-	-
P35354	DB00863	-	-
P35354	DB00325	-	-
P35354	DB00864	-	-
P35354	DB01113	-	-
P35354	DB01110	-	-
P35354	DB01114	-	-
P35354	DB01115	-	-
P35354	DB00177	-	-
P35354	DB01118	-	-
P35354	DB01119	-	-
P35354	DB01074	-	-
P35354	DB00175	-	-
P35354	DB00263	-	-
P35354	DB00262	-	-
P35354	DB00266	-	-
P35354	DB00265	-	-
P35354	DB00264	-	-
P35354	DB00342	-	-
P35354	DB00343	-	-
P35354	DB00347	-	-
P35354	DB00423	-	-
P35354	DB00635	-	-
P35354	DB00636	-	-
P35354	DB00637	-	-
P35354	DB00630	-	-
P35354	DB01233	-	-
P35354	DB01232	-	-
P35354	DB01231	-	-
P35354	DB01235	-	-
P35354	DB01234	-	-
P35354	DB00104	-	-
P35354	DB00518	-	-
P35354	DB00904	-	-
P35354	DB01047	-	-
P35354	DB00903	-	-
P35354	DB00513	-	-
P35354	DB00512	-	-
P35354	DB00515	-	-
P35354	DB00514	-	-
P35354	DB01026	-	-
P35354	DB00688	-	-
P35354	DB00122	-	-
P35354	DB01023	-	-
P35354	DB00126	-	-
P35354	DB01021	-	-
P35354	DB00681	-	-
P35354	DB00682	-	-
P35354	DB01435	-	-
P35354	DB00684	-	-
P35354	DB01436	-	-
P35354	DB00999	-	-
P35354	DB00995	-	-
P35354	DB00994	-	-
P35354	DB00997	-	-
P35354	DB00996	-	-
P35354	DB00991	-	-
P35354	DB04552	-	-
P35354	DB04573	-	-
P35354	DB00836	-	-
P35354	DB01095	-	-
P35354	DB01092	-	-
P35354	DB01091	-	-
P35354	DB00656	-	-
P35354	DB00655	-	-
P35354	DB01099	-	-
P35354	DB00651	-	-
P35354	DB01253	-	-
P35354	DB00393	-	-
P35354	DB00420	-	-
P35354	DB01380	-	-
P35354	DB00391	-	-
P35354	DB00928	-	-
P35354	DB00841	-	-
P35354	DB00934	-	-
P35354	DB00381	-	-
P35354	DB00382	-	-
P35354	DB00844	-	-
P35354	DB00920	-	-
P35354	DB00433	-	-
P35354	DB00848	-	-
P35354	DB00437	-	-
P35354	DB00434	-	-
P35354	DB00396	-	-
P35354	DB01008	-	-
P35354	DB01009	-	-
P35354	DB00531	-	-
P35354	DB00537	-	-
P35354	DB01001	-	-
P35354	DB01002	-	-
P35354	DB01003	-	-
P35354	DB01005	-	-
P35354	DB01006	-	-
P35354	DB00541	-	-
P35354	DB00279	-	-
P35354	DB00274	-	-
P35354	DB00821	-	-
P35354	DB00277	-	-
P35354	DB00271	-	-
P35354	DB00376	-	-
P35354	DB00373	-	-
P35354	DB00379	-	-
P35354	DB06150	-	-
P35354	DB01171	-	-
P35354	DB01172	-	-
P35354	DB01173	-	-
P35354	DB01174	-	-
P35354	DB01175	-	-
P35354	DB01176	-	-
P35354	DB01177	-	-
P35354	DB01179	-	-
P35354	DB00970	-	-
P35354	DB00977	-	-
P35354	DB00975	-	-
P35354	DB00502	-	-
P35354	DB00503	-	-
P35354	DB00500	-	-
P35354	DB00978	-	-
P35354	DB01581	-	-
P35354	DB01582	-	-
P35354	DB01053	-	-
P35354	DB00698	-	-
P35354	DB01050	-	-
P35354	DB01056	-	-
P35354	DB01055	-	-
P35354	DB01054	-	-
P35354	DB00692	-	-
P35354	DB01351	-	-
P35354	DB01059	-	-
P35354	DB01058	-	-
P35354	DB00696	-	-
P35354	DB01427	-	-
P35354	DB00694	-	-
P35354	DB00695	-	-
P35354	DB00987	-	-
P35354	DB00982	-	-
P35354	DB00981	-	-
P35354	DB00591	-	-
P35354	DB00590	-	-
P35354	DB00593	-	-
P35354	DB00595	-	-
P35354	DB00598	-	-
P35354	DB00778	-	-
P35354	DB00809	-	-
P35354	DB00808	-	-
P35354	DB00807	-	-
P35354	DB00806	-	-
P35354	DB00773	-	-
P35354	DB00804	-	-
P35354	DB00776	-	-
P35354	DB00477	-	-
P35354	DB00472	-	-
P35354	DB00471	-	-
P35354	DB00577	-	-
P35354	DB00576	-	-
P35354	DB00575	-	-
P35354	DB00573	-	-
P35354	DB00572	-	-
P35354	DB00571	-	-
P35354	DB00479	-	-
P35354	DB00186	-	-
P35354	DB00187	-	-
P35354	DB00184	-	-
P35354	DB00180	-	-
P35354	DB00181	-	-
P35354	DB00870	-	-
P35354	DB00871	-	-
P35354	DB00877	-	-
P35354	DB00874	-	-
P35354	DB01128	-	-
P35354	DB01121	-	-
P35354	DB01120	-	-
P35354	DB01127	-	-
P35354	DB01125	-	-
P35354	DB00330	-	-
P35354	DB00238	-	-
P35354	DB00239	-	-
P35354	DB00443	-	-
P35354	DB01087	-	-
P35354	DB00235	-	-
P35354	DB00600	-	-
P35354	DB00602	-	-
P35354	DB00418	-	-
P35354	DB00604	-	-
P35354	DB01224	-	-
P35354	DB01221	-	-
P35354	DB01222	-	-
P35354	DB01223	-	-
P35354	DB00898	-	-
P35354	DB00950	-	-
P35354	DB00936	-	-
P35354	DB01339	-	-
P35354	DB00730	-	-
P35354	DB01148	-	-
P35354	DB01147	-	-
P35354	DB01143	-	-
P35354	DB01142	-	-
P35354	DB01082	-	-
P35354	DB00839	-	-
P35354	DB01086	-	-
P35354	DB00145	-	-
P35354	DB00623	-	-
P35354	DB00620	-	-
P35354	DB00627	-	-
P35354	DB00624	-	-
P35354	DB01242	-	-
P35354	DB01241	-	-
P35354	DB01248	-	-
P35354	DB01394	-	-
P35354	DB01396	-	-
P35354	DB06148	-	-
P35354	DB00169	-	-
P35354	DB01392	-	-
P35354	DB01393	-	-
P35354	DB06147	-	-
P35354	DB01399	-	-
P35354	DB00818	-	-
P35354	DB00819	-	-
P35354	DB00762	-	-
P35354	DB00763	-	-
P35354	DB00812	-	-
P35354	DB00814	-	-
P35354	DB00765	-	-
P35354	DB00568	-	-
P35354	DB00401	-	-
P35354	DB00400	-	-
P35354	DB00406	-	-
P35354	DB00404	-	-
P35354	DB00561	-	-
P35354	DB00563	-	-
P35354	DB00564	-	-
P35354	DB04841	-	-
P35354	DB00567	-	-
P35354	DB00759	-	-
P35354	DB01426	-	-
P35354	DB00884	-	-
P35354	DB00968	-	-
P35354	DB00969	-	-
P35354	DB00881	-	-
P35354	DB00967	-	-
P35354	DB00960	-	-
P35354	DB00961	-	-
P35354	DB00889	-	-
P35354	DB00963	-	-
P35354	DB06729	-	-
P35354	DB00249	-	-
P35354	DB00717	-	-
P35354	DB00715	-	-
P35354	DB00242	-	-
P35354	DB00245	-	-
P35354	DB00712	-	-
P35354	DB00247	-	-
P35354	DB00367	-	-
P35354	DB00365	-	-
P35354	DB00363	-	-
P35354	DB00361	-	-
P35354	DB01024	-	-
P35354	DB03166	-	-
P35354	DB00614	-	-
P35354	DB00615	-	-
P35354	DB01211	-	-
P35354	DB01210	-	-
P35354	DB01213	-	-
P35354	DB00619	-	-
P35354	DB01217	-	-
P35354	DB01216	-	-
P35354	DB06698	-	-
P35354	DB01188	-	-
P35354	DB01627	-	-
P35354	DB01181	-	-
P35354	DB06691	-	-
P35354	DB01183	-	-
P35354	DB01182	-	-
P35354	DB01184	-	-
P35354	DB01186	-	-
P35354	DB00685	-	-
P35354	DB00811	-	-
P35354	DB01029	-	-
P35354	DB00760	-	-
P35354	DB08807	-	-
P35354	DB04838	-	-
P35354	DB01599	-	-
P35354	DB01044	-	-
P35354	DB01045	-	-
P35354	DB01229	-	-
P35354	DB01595	-	-
P35354	DB01041	-	-
P35354	DB01042	-	-
P35354	DB00661	-	-
P35354	DB00669	-	-
P35354	DB00668	-	-
P35354	DB00583	-	-
P35354	DB00586	-	-
P35354	DB00584	-	-
P35354	DB00585	-	-
P35354	DB08797	-	-
P35354	DB00589	-	-
P35354	DB00339	-	-
P35354	DB00724	-	-
P35354	DB00725	-	-
P35354	DB00722	-	-
P35354	DB00721	-	-
P35354	DB00331	-	-
P35354	DB00446	-	-
P35354	DB00445	-	-
P35354	DB00335	-	-
P35354	DB00334	-	-
P35354	DB00441	-	-
P35354	DB01136	-	-
P35354	DB01137	-	-
P35354	DB01132	-	-
P35354	DB01206	-	-
P35354	DB00207	-	-
P35354	DB00206	-	-
P35354	DB00201	-	-
P35354	DB00202	-	-
P35354	DB00208	-	-
P35354	DB06770	-	-
P20813	-	TAXID:4047	Xanthotoxin
P20813	-	TAXID:4045	Bergapten
P20813	-	TAXID:4045	Furocoumarin
P20813	-	TAXID:4045	Xanthotoxin
P20813	-	TAXID:48038	Bergapten
P20813	-	TAXID:48038	Xanthotoxin
P20813	-	TAXID:94328	Xanthotoxin
P20813	-	TAXID:4236	Ethinyl Estradiol
P20813	-	TAXID:3494	Bergapten
P20813	-	TAXID:3494	Furocoumarin
P20813	-	TAXID:3494	Xanthotoxin
P20813	-	TAXID:3649	Bergapten
P20813	-	TAXID:3649	Furocoumarin
P20813	-	TAXID:3649	Xanthotoxin
P20813	-	TAXID:4041	Bergapten
P20813	-	TAXID:4041	Furocoumarin
P20813	-	TAXID:4041	Xanthotoxin
P20813	DB00818	-	-
P20813	DB04572	-	-
P20813	DB00637	-	-
P20813	DB00977	-	-
P20813	DB01104	-	-
P20813	DB01100	-	-
P20813	DB00503	-	-
P20813	DB00675	-	-
P20813	DB00252	-	-
P20813	DB01184	-	-
P20813	DB00238	-	-
P20813	DB00969	-	-
P20813	DB00608	-	-
P20813	DB00604	-	-
P20813	DB01156	-	-
P20813	DB01045	-	-
P20813	DB01221	-	-
P20813	DB00625	-	-
P20813	DB01026	-	-
P20813	DB00532	-	-
P20813	DB00531	-	-
P20813	DB01173	-	-
P20813	DB01174	-	-
P20813	DB00553	-	-
P20813	DB00758	-	-
P20813	DB00454	-	-
P20813	DB00362	-	-
P20813	DB00752	-	-
P20813	DB00208	-	-
P20813	DB00582	-	-
P20813	DB00763	-	-
P06133	-	TAXID:4006	Sodium Cholate
P06133	-	TAXID:4081	Serotonin
P06133	-	TAXID:3847	Sodium Cholate
P06133	-	TAXID:94328	Serotonin
P06133	-	TAXID:4236	Ethinyl Estradiol
P06133	-	TAXID:3621	Sodium Cholate
P06133	-	TAXID:4113	Serotonin
P06133	-	TAXID:4222	Serotonin
P06133	DB04573	-	-
P06133	DB00783	-	-
P06133	DB00977	-	-
P06133	DB00788	-	-
P06133	DB00936	-	-
P06133	DB01586	-	-
P06133	DB01600	-	-
P06133	DB01050	-	-
P06133	DB00446	-	-
P06133	DB00313	-	-
P06133	DB00316	-	-
P06133	DB00231	-	-
P06133	DB00318	-	-
P06133	DB00379	-	-
P06133	DB00655	-	-
P06133	DB00861	-	-
P06133	DB00842	-	-
P06133	DB01136	-	-
P06133	DB00295	-	-
P06133	DB00624	-	-
P06133	DB00458	-	-
P06133	DB01009	-	-
P06133	DB00328	-	-
P06133	DB00573	-	-
P06133	DB00571	-	-
P06133	DB00186	-	-
P06133	DB08797	-	-
P06133	DB06777	-	-
P11712	-	TAXID:3627	Chlorogenic Acid
P11712	-	TAXID:3755	N-Vanillyl-Nonanamide
P11712	-	TAXID:3750	Phloridzin
P11712	-	TAXID:65948	Luteolin
P11712	-	TAXID:65948	Apigenin
P11712	-	TAXID:65948	Caffeic Acid
P11712	-	TAXID:74900	Quercetin
P11712	-	TAXID:74900	Kaempferol
P11712	-	TAXID:74900	Caffeic Acid
P11712	-	TAXID:175228	Myricetin
P11712	-	TAXID:175228	Resveratrol
P11712	-	TAXID:175228	Quercetin
P11712	-	TAXID:4081	Phloretin
P11712	-	TAXID:4081	Serotonin
P11712	-	TAXID:4081	Spermidine
P11712	-	TAXID:4081	Chlorogenic Acid
P11712	-	TAXID:4081	Quercetin
P11712	-	TAXID:4081	Naringenin
P11712	-	TAXID:4081	Resveratrol
P11712	-	TAXID:4442	Luteolin
P11712	-	TAXID:4442	Fisetin
P11712	-	TAXID:4442	Genistein
P11712	-	TAXID:4442	Hesperetin
P11712	-	TAXID:4442	Phloretin
P11712	-	TAXID:4442	Chlorogenic Acid
P11712	-	TAXID:4442	Kaempferol
P11712	-	TAXID:4442	Caffeic Acid
P11712	-	TAXID:4442	Apigenin
P11712	-	TAXID:4442	Daidzein
P11712	-	TAXID:4442	Quercetin
P11712	-	TAXID:4442	Naringenin
P11712	-	TAXID:4442	Resveratrol
P11712	-	TAXID:4577	Lincomycin
P11712	-	TAXID:4577	Kaempferol
P11712	-	TAXID:4577	Caffeic Acid
P11712	-	TAXID:4577	Chlorogenic Acid
P11712	-	TAXID:4577	Quercetin
P11712	-	TAXID:4577	Naringenin
P11712	-	TAXID:3494	Bergapten
P11712	-	TAXID:3494	Furocoumarin
P11712	-	TAXID:36610	Luteolin
P11712	-	TAXID:36610	Apigenin
P11712	-	TAXID:36610	Chlorogenic Acid
P11712	-	TAXID:36610	Kaempferol
P11712	-	TAXID:36610	Quercetin
P11712	-	TAXID:157791	Nicotine
P11712	-	TAXID:157791	Isoliquiritigenin
P11712	-	TAXID:4182	Sesamin
P11712	-	TAXID:3712	Quercetin
P11712	-	TAXID:3712	Kaempferol
P11712	-	TAXID:3712	Caffeic Acid
P11712	-	TAXID:114280	Quercetin
P11712	-	TAXID:114280	Caffeic Acid
P11712	-	TAXID:114280	Chlorogenic Acid
P11712	-	TAXID:4045	Luteolin
P11712	-	TAXID:4045	Bergapten
P11712	-	TAXID:4045	Furocoumarin
P11712	-	TAXID:4045	Kaempferol
P11712	-	TAXID:4045	Caffeic Acid
P11712	-	TAXID:4045	Apigenin
P11712	-	TAXID:4045	Quercetin
P11712	-	TAXID:4679	Quercetin
P11712	-	TAXID:4679	Kaempferol
P11712	-	TAXID:4047	Luteolin
P11712	-	TAXID:4047	Quercetin
P11712	-	TAXID:4047	Kaempferol
P11712	-	TAXID:4041	Bergapten
P11712	-	TAXID:4041	Furocoumarin
P11712	-	TAXID:78168	Luteolin
P11712	-	TAXID:78168	Apigenin
P11712	-	TAXID:13216	Capsaicin
P11712	-	TAXID:13216	Caryophyllene Oxide
P11712	-	TAXID:13216	Curcumin
P11712	-	TAXID:13216	Paroxetine
P11712	-	TAXID:4202	Amantadine
P11712	-	TAXID:3708	Luteolin
P11712	-	TAXID:3708	Kaempferol
P11712	-	TAXID:3708	Caffeic Acid
P11712	-	TAXID:3708	Quercetin
P11712	-	TAXID:3708	Naringenin
P11712	-	TAXID:3708	Finasteride
P11712	-	TAXID:3641	Salsolinol
P11712	-	TAXID:48038	Luteolin
P11712	-	TAXID:48038	Quercetin
P11712	-	TAXID:48038	Bergapten
P11712	-	TAXID:48038	Kaempferol
P11712	-	TAXID:48038	Chlorogenic Acid
P11712	-	TAXID:89151	Apigenin
P11712	-	TAXID:89151	Salsolinol
P11712	-	TAXID:3760	Hesperetin
P11712	-	TAXID:3760	9-Amino-1234-Tetrahydroacridine
P11712	-	TAXID:32224	Chlorogenic Acid
P11712	-	TAXID:3635	Caryophyllene Oxide
P11712	-	TAXID:4146	Luteolin
P11712	-	TAXID:4146	Apigenin
P11712	-	TAXID:4146	Kaempferol
P11712	-	TAXID:4146	Caffeic Acid
P11712	-	TAXID:4146	Quercetin
P11712	-	TAXID:3469	Isoboldine
P11712	-	TAXID:3469	Sanguinarine
P11712	-	TAXID:3469	Phenylbutazone
P11712	-	TAXID:3469	Kaempferol
P11712	-	TAXID:3469	Narcotine
P11712	-	TAXID:3469	Quercetin
P11712	-	TAXID:3469	Papaverine
P11712	-	TAXID:29760	Quercetin
P11712	-	TAXID:29760	Resveratrol
P11712	-	TAXID:29760	Caffeic Acid
P11712	-	TAXID:29760	E-Piceatannol
P11712	-	TAXID:29780	Ellagic Acid
P11712	-	TAXID:29780	Quercetin
P11712	-	TAXID:29780	Kaempferol
P11712	-	TAXID:29780	Caffeic Acid
P11712	-	TAXID:3747	Resveratrol
P11712	-	TAXID:3747	Kaempferol
P11712	-	TAXID:3747	Caffeic Acid
P11712	-	TAXID:3747	Phloridzin
P11712	-	TAXID:3747	Ellagic Acid
P11712	-	TAXID:3747	Quercetin
P11712	-	TAXID:3747	Naringenin
P11712	-	TAXID:3617	Quercetin
P11712	-	TAXID:4006	Podophyllotoxin
P11712	-	TAXID:3621	E-Piceatannol
P11712	-	TAXID:3621	Resveratrol
P11712	-	TAXID:3621	Caffeic Acid
P11712	-	TAXID:32247	Ellagic Acid
P11712	-	TAXID:32247	Quercetin
P11712	-	TAXID:32247	Kaempferol
P11712	-	TAXID:4682	Quercetin
P11712	-	TAXID:3818	Resveratrol
P11712	-	TAXID:4681	Quercetin
P11712	-	TAXID:4681	Kaempferol
P11712	-	TAXID:4681	Caffeic Acid
P11712	-	TAXID:4513	Caffeic Acid
P11712	-	TAXID:128608	Caffeic Acid
P11712	-	TAXID:4111	Chlorogenic Acid
P11712	-	TAXID:4111	Caffeic Acid
P11712	-	TAXID:49827	Formononetin
P11712	-	TAXID:49827	Isoliquiritigenin
P11712	-	TAXID:49827	Caffeic Acid
P11712	-	TAXID:49827	Pinocembrin
P11712	-	TAXID:49827	Galangin
P11712	-	TAXID:49827	Glabranin
P11712	-	TAXID:49827	Naringenin
P11712	-	TAXID:49827	Nordihydroguaiaretic Acid
P11712	-	TAXID:49827	Anabasine
P11712	-	TAXID:35925	Quercetin
P11712	-	TAXID:35925	Kaempferol
P11712	-	TAXID:35925	Caffeic Acid
P11712	-	TAXID:35925	Chlorogenic Acid
P11712	-	TAXID:3562	Thapsigargin
P11712	-	TAXID:3888	Formononetin
P11712	-	TAXID:3888	Kaempferol
P11712	-	TAXID:3888	Daidzein
P11712	-	TAXID:3888	Quercetin
P11712	-	TAXID:3888	Naringenin
P11712	-	TAXID:3888	Biochanin A
P11712	-	TAXID:4565	Formononetin
P11712	-	TAXID:4565	Iodoacetamide
P11712	-	TAXID:4565	Resveratrol
P11712	-	TAXID:4565	Chlorogenic Acid
P11712	-	TAXID:4565	Quercetin
P11712	-	TAXID:94328	5-Hydroxy-7-Methoxyflavone
P11712	-	TAXID:94328	Chlorogenic Acid
P11712	-	TAXID:94328	Serotonin
P11712	-	TAXID:94328	Apigenin
P11712	-	TAXID:94328	Curcumin
P11712	-	TAXID:94328	Mevalonolactone
P11712	-	TAXID:4236	Gemfibrozil
P11712	-	TAXID:4236	Quercetin
P11712	-	TAXID:151069	Ellagic Acid
P11712	-	TAXID:151069	Azetidine-2-Carboxylic Acid
P11712	-	TAXID:151069	Kaempferol
P11712	-	TAXID:151069	Phloridzin
P11712	-	TAXID:51240	Caffeic Acid
P11712	-	TAXID:3885	Quercetin
P11712	-	TAXID:3649	Bergapten
P11712	-	TAXID:3649	Furocoumarin
P11712	-	TAXID:3649	Daidzein
P11712	-	TAXID:4073	Capsaicin
P11712	-	TAXID:4073	Dihydrocapsaicin
P11712	-	TAXID:4072	Capsaicin
P11712	-	TAXID:4072	Luteolin
P11712	-	TAXID:4072	Propidium Iodide
P11712	-	TAXID:4072	Dihydrocapsaicin
P11712	-	TAXID:4072	Apigenin
P11712	-	TAXID:4072	Quercetin
P11712	-	TAXID:4072	Curcumin
P11712	-	TAXID:161934	Azetidine-2-Carboxylic Acid
P11712	-	TAXID:161934	Ajmalicine
P11712	-	TAXID:161934	Silymarin
P11712	-	TAXID:180772	Quercetin
P11712	-	TAXID:180772	Resveratrol
P11712	-	TAXID:180772	Kaempferol
P11712	-	TAXID:13427	Quercetin
P11712	-	TAXID:13427	Caffeic Acid
P11712	-	TAXID:13427	Chlorogenic Acid
P11712	-	TAXID:4120	Chlorogenic Acid
P11712	-	TAXID:4120	Caffeic Acid
P11712	-	TAXID:4222	Luteolin
P11712	-	TAXID:4222	Quercetin
P11712	-	TAXID:4222	Acacetin
P11712	-	TAXID:4222	Serotonin
P11712	-	TAXID:4498	Nicotine
P11712	-	TAXID:4498	Caffeic Acid
P11712	-	TAXID:4530	Quercetin
P11712	-	TAXID:4530	Kaempferol
P11712	-	TAXID:120290	Kaempferol
P11712	-	TAXID:120290	Caffeic Acid
P11712	-	TAXID:120290	Chlorogenic Acid
P11712	-	TAXID:120290	Ellagic Acid
P11712	-	TAXID:120290	Quercetin
P11712	-	TAXID:120290	Naringenin
P11712	-	TAXID:74645	Quercetin
P11712	-	TAXID:74645	Kaempferol
P11712	-	TAXID:22663	Ellagic Acid
P11712	-	TAXID:22663	Myricetin
P11712	-	TAXID:22663	Quercetin
P11712	-	TAXID:3847	Isoliquiritigenin
P11712	-	TAXID:3847	Genistein
P11712	-	TAXID:3847	Kaempferol
P11712	-	TAXID:3847	Apigenin
P11712	-	TAXID:3847	Daidzein
P11712	-	TAXID:3847	Quercetin
P11712	-	TAXID:3847	Naringenin
P11712	-	TAXID:3711	Spermidine
P11712	-	TAXID:3711	Quercetin
P11712	-	TAXID:3711	Resveratrol
P11712	-	TAXID:3711	Kaempferol
P11712	-	TAXID:3711	Caffeic Acid
P11712	-	TAXID:3659	Quercetin
P11712	-	TAXID:3659	Kaempferol
P11712	-	TAXID:50225	Luteolin
P11712	-	TAXID:50225	Quercetin
P11712	-	TAXID:50225	Chlorogenic Acid
P11712	-	TAXID:4113	Chlorogenic Acid
P11712	-	TAXID:4113	Serotonin
P11712	-	TAXID:4113	Caffeic Acid
P11712	-	TAXID:3864	Luteolin
P11712	-	TAXID:3864	Caffeic Acid
P11712	DB01097	-	-
P11712	DB00150	-	-
P11712	DB00153	-	-
P11712	DB00709	-	-
P11712	DB00258	-	-
P11712	DB00259	-	-
P11712	DB00252	-	-
P11712	DB00253	-	-
P11712	DB00250	-	-
P11712	DB00703	-	-
P11712	DB00704	-	-
P11712	DB00257	-	-
P11712	DB00254	-	-
P11712	DB00255	-	-
P11712	DB00313	-	-
P11712	DB00310	-	-
P11712	DB00316	-	-
P11712	DB00091	-	-
P11712	DB00319	-	-
P11712	DB01090	-	-
P11712	DB01180	-	-
P11712	DB00478	-	-
P11712	DB00158	-	-
P11712	DB00883	-	-
P11712	DB00479	-	-
P11712	DB00969	-	-
P11712	DB01158	-	-
P11712	DB01156	-	-
P11712	DB01153	-	-
P11712	DB01151	-	-
P11712	DB06782	-	-
P11712	DB00650	-	-
P11712	DB00613	-	-
P11712	DB00339	-	-
P11712	DB00967	-	-
P11712	DB00229	-	-
P11712	DB00227	-	-
P11712	DB00224	-	-
P11712	DB00223	-	-
P11712	DB00222	-	-
P11712	DB00221	-	-
P11712	DB00220	-	-
P11712	DB00962	-	-
P11712	DB06714	-	-
P11712	DB06711	-	-
P11712	DB00233	-	-
P11712	DB00179	-	-
P11712	DB00178	-	-
P11712	DB01071	-	-
P11712	DB00172	-	-
P11712	DB00170	-	-
P11712	DB01075	-	-
P11712	DB00176	-	-
P11712	DB01077	-	-
P11712	DB01076	-	-
P11712	DB00670	-	-
P11712	DB00671	-	-
P11712	DB00672	-	-
P11712	DB00674	-	-
P11712	DB00675	-	-
P11712	DB00701	-	-
P11712	DB00679	-	-
P11712	DB01275	-	-
P11712	DB01274	-	-
P11712	DB00284	-	-
P11712	DB00251	-	-
P11712	DB01062	-	-
P11712	DB01060	-	-
P11712	DB00797	-	-
P11712	DB00795	-	-
P11712	DB00794	-	-
P11712	DB00793	-	-
P11712	DB00823	-	-
P11712	DB00822	-	-
P11712	DB00414	-	-
P11712	DB00415	-	-
P11712	DB00417	-	-
P11712	DB00829	-	-
P11712	DB00411	-	-
P11712	DB00412	-	-
P11712	DB00640	-	-
P11712	DB00555	-	-
P11712	DB00554	-	-
P11712	DB00557	-	-
P11712	DB01578	-	-
P11712	DB01064	-	-
P11712	DB00553	-	-
P11712	DB01577	-	-
P11712	DB00890	-	-
P11712	DB00891	-	-
P11712	DB00489	-	-
P11712	DB00488	-	-
P11712	DB00896	-	-
P11712	DB00951	-	-
P11712	DB00482	-	-
P11712	DB00481	-	-
P11712	DB00487	-	-
P11712	DB00954	-	-
P11712	DB00484	-	-
P11712	DB01101	-	-
P11712	DB01100	-	-
P11712	DB01103	-	-
P11712	DB01105	-	-
P11712	DB01104	-	-
P11712	DB01106	-	-
P11712	DB00243	-	-
P11712	DB00214	-	-
P11712	DB00215	-	-
P11712	DB00359	-	-
P11712	DB00211	-	-
P11712	DB00357	-	-
P11712	DB00356	-	-
P11712	DB00354	-	-
P11712	DB00353	-	-
P11712	DB00244	-	-
P11712	DB00711	-	-
P11712	DB01208	-	-
P11712	DB00527	-	-
P11712	DB01618	-	-
P11712	DB01614	-	-
P11712	DB01200	-	-
P11712	DB01616	-	-
P11712	DB01611	-	-
P11712	DB01204	-	-
P11712	DB01205	-	-
P11712	DB01198	-	-
P11712	DB01199	-	-
P11712	DB01192	-	-
P11712	DB01193	-	-
P11712	DB01190	-	-
P11712	DB01191	-	-
P11712	DB01197	-	-
P11712	DB01194	-	-
P11712	DB01195	-	-
P11712	DB00567	-	-
P11712	DB00242	-	-
P11712	DB00361	-	-
P11712	DB01291	-	-
P11712	DB01297	-	-
P11712	DB01299	-	-
P11712	DB01408	-	-
P11712	DB00915	-	-
P11712	DB00914	-	-
P11712	DB00916	-	-
P11712	DB00911	-	-
P11712	DB00529	-	-
P11712	DB00912	-	-
P11712	DB00524	-	-
P11712	DB00525	-	-
P11712	DB01032	-	-
P11712	DB00919	-	-
P11712	DB00438	-	-
P11712	DB00523	-	-
P11712	DB01035	-	-
P11712	DB08797	-	-
P11712	DB01037	-	-
P11712	DB00133	-	-
P11712	DB01030	-	-
P11712	DB00130	-	-
P11712	DB01406	-	-
P11712	DB01407	-	-
P11712	DB01039	-	-
P11712	DB01403	-	-
P11712	DB00382	-	-
P11712	DB01400	-	-
P11712	DB00432	-	-
P11712	DB00436	-	-
P11712	DB04552	-	-
P11712	DB00923	-	-
P11712	DB00289	-	-
P11712	DB00239	-	-
P11712	DB00285	-	-
P11712	DB00388	-	-
P11712	DB00281	-	-
P11712	DB00280	-	-
P11712	DB00283	-	-
P11712	DB00389	-	-
P11712	DB00458	-	-
P11712	DB00752	-	-
P11712	DB00328	-	-
P11712	DB00750	-	-
P11712	DB00756	-	-
P11712	DB00755	-	-
P11712	DB00754	-	-
P11712	DB00450	-	-
P11712	DB00451	-	-
P11712	DB00320	-	-
P11712	DB00321	-	-
P11712	DB00454	-	-
P11712	DB00455	-	-
P11712	DB00324	-	-
P11712	DB00457	-	-
P11712	DB04571	-	-
P11712	DB00532	-	-
P11712	DB00859	-	-
P11712	DB03255	-	-
P11712	DB00854	-	-
P11712	DB03166	-	-
P11712	DB00850	-	-
P11712	DB00851	-	-
P11712	DB00852	-	-
P11712	DB00780	-	-
P11712	DB00428	-	-
P11712	DB00834	-	-
P11712	DB00783	-	-
P11712	DB00784	-	-
P11712	DB00833	-	-
P11712	DB00939	-	-
P11712	DB00938	-	-
P11712	DB00393	-	-
P11712	DB00420	-	-
P11712	DB00391	-	-
P11712	DB00390	-	-
P11712	DB00397	-	-
P11712	DB00396	-	-
P11712	DB00427	-	-
P11712	DB00394	-	-
P11712	DB04865	-	-
P11712	DB00547	-	-
P11712	DB00544	-	-
P11712	DB00545	-	-
P11712	DB00542	-	-
P11712	DB00543	-	-
P11712	DB01019	-	-
P11712	DB01018	-	-
P11712	DB01017	-	-
P11712	DB01016	-	-
P11712	DB01015	-	-
P11712	DB01014	-	-
P11712	DB01351	-	-
P11712	DB00548	-	-
P11712	DB00549	-	-
P11712	DB01003	-	-
P11712	DB00336	-	-
P11712	DB00495	-	-
P11712	DB00949	-	-
P11712	DB00490	-	-
P11712	DB08828	-	-
P11712	DB00493	-	-
P11712	DB00943	-	-
P11712	DB00940	-	-
P11712	DB08826	-	-
P11712	DB00498	-	-
P11712	DB00499	-	-
P11712	DB00425	-	-
P11712	DB00945	-	-
P11712	DB00149	-	-
P11712	DB00619	-	-
P11712	DB00788	-	-
P11712	DB00292	-	-
P11712	DB00735	-	-
P11712	DB00734	-	-
P11712	DB00737	-	-
P11712	DB00731	-	-
P11712	DB00730	-	-
P11712	DB00733	-	-
P11712	DB00732	-	-
P11712	DB00305	-	-
P11712	DB00738	-	-
P11712	DB00302	-	-
P11712	DB06698	-	-
P11712	DB00789	-	-
P11712	DB00275	-	-
P11712	DB00776	-	-
P11712	DB00898	-	-
P11712	DB01606	-	-
P11712	DB01604	-	-
P11712	DB01605	-	-
P11712	DB01602	-	-
P11712	DB01600	-	-
P11712	DB01167	-	-
P11712	DB01166	-	-
P11712	DB01165	-	-
P11712	DB01213	-	-
P11712	DB01162	-	-
P11712	DB01160	-	-
P11712	DB00426	-	-
P11712	DB00604	-	-
P11712	DB01224	-	-
P11712	DB01287	-	-
P11712	DB00608	-	-
P11712	DB01288	-	-
P11712	DB06697	-	-
P11712	DB00165	-	-
P11712	DB00166	-	-
P11712	DB01069	-	-
P11712	DB00160	-	-
P11712	DB00648	-	-
P11712	DB00163	-	-
P11712	DB00645	-	-
P11712	DB00647	-	-
P11712	DB01061	-	-
P11712	DB00641	-	-
P11712	DB01067	-	-
P11712	DB00643	-	-
P11712	DB01065	-	-
P11712	DB01301	-	-
P11712	DB00653	-	-
P11712	DB00282	-	-
P11712	DB06710	-	-
P11712	DB00748	-	-
P11712	DB00749	-	-
P11712	DB00298	-	-
[truncated: 8,099 more rows]

## Sheet: Transporter
Protein	Drug name	Plant source	Plant compound
Q92887	-	TAXID:4202	Amantadine
Q92887	-	TAXID:36610	Quercetin
Q92887	-	TAXID:36610	Apigenin
Q92887	-	TAXID:74900	Quercetin
Q92887	-	TAXID:175228	Quercetin
Q92887	-	TAXID:175228	Resveratrol
Q92887	-	TAXID:175228	Taxifolin
Q92887	-	TAXID:4081	Quercetin
Q92887	-	TAXID:4081	Resveratrol
Q92887	-	TAXID:4081	Naringenin
Q92887	-	TAXID:4442	Quercetin
Q92887	-	TAXID:4442	Resveratrol
Q92887	-	TAXID:4442	Naringenin
Q92887	-	TAXID:4442	Genistein
Q92887	-	TAXID:4442	Apigenin
Q92887	-	TAXID:4577	Quercetin
Q92887	-	TAXID:4577	Naringenin
Q92887	-	TAXID:4577	Tryptophan
Q92887	-	TAXID:29760	Quercetin
Q92887	-	TAXID:29760	Resveratrol
Q92887	-	TAXID:4006	Sodium Cholate
Q92887	-	TAXID:157791	Nicotine
Q92887	-	TAXID:157791	Tryptophan
Q92887	-	TAXID:33125	Carbamazepine
Q92887	-	TAXID:114280	Quercetin
Q92887	-	TAXID:4045	Quercetin
Q92887	-	TAXID:4045	Tryptophan
Q92887	-	TAXID:4045	Apigenin
Q92887	-	TAXID:4679	Quercetin
Q92887	-	TAXID:4679	Tryptophan
Q92887	-	TAXID:4679	Taxifolin
Q92887	-	TAXID:4047	Quercetin
Q92887	-	TAXID:78168	Apigenin
Q92887	-	TAXID:13216	Dextromethorphan
Q92887	-	TAXID:48038	Quercetin
Q92887	-	TAXID:4550	Isonicotinic Acid Hydrazide
Q92887	-	TAXID:89151	Apigenin
Q92887	-	TAXID:4146	Quercetin
Q92887	-	TAXID:4146	Apigenin
Q92887	-	TAXID:65948	Apigenin
Q92887	-	TAXID:3469	Quercetin
Q92887	-	TAXID:3469	Sanguinarine
Q92887	-	TAXID:3469	Tramadol
Q92887	-	TAXID:3469	Narcotine
Q92887	-	TAXID:3621	Sodium Cholate
Q92887	-	TAXID:3621	Resveratrol
Q92887	-	TAXID:3621	Cholestatic
Q92887	-	TAXID:3621	Sodium Taurocholate
Q92887	-	TAXID:29780	Quercetin
Q92887	-	TAXID:3617	Quercetin
Q92887	-	TAXID:3617	Tryptophan
Q92887	-	TAXID:3708	Quercetin
Q92887	-	TAXID:3708	Naringenin
Q92887	-	TAXID:3708	Tryptophan
Q92887	-	TAXID:32247	Quercetin
Q92887	-	TAXID:4682	Quercetin
Q92887	-	TAXID:4682	Tryptophan
Q92887	-	TAXID:3818	Resveratrol
Q92887	-	TAXID:49827	Naringenin
Q92887	-	TAXID:49827	Glycyrrhizin
Q92887	-	TAXID:4681	Quercetin
Q92887	-	TAXID:35925	Quercetin
Q92887	-	TAXID:3747	Quercetin
Q92887	-	TAXID:3747	Resveratrol
Q92887	-	TAXID:3747	Naringenin
Q92887	-	TAXID:3562	Tryptophan
Q92887	-	TAXID:3888	Quercetin
Q92887	-	TAXID:3888	Naringenin
Q92887	-	TAXID:3888	Oxidised Glutathione
Q92887	-	TAXID:3888	Tryptophan
Q92887	-	TAXID:3888	Biochanin A
Q92887	-	TAXID:4565	Quercetin
Q92887	-	TAXID:4565	Resveratrol
Q92887	-	TAXID:4072	Quercetin
Q92887	-	TAXID:4072	Apigenin
Q92887	-	TAXID:4236	Quercetin
Q92887	-	TAXID:4236	Ethinyl Estradiol
Q92887	-	TAXID:151069	Taxifolin
Q92887	-	TAXID:3885	Quercetin
Q92887	-	TAXID:3885	Tryptophan
Q92887	-	TAXID:50225	Quercetin
Q92887	-	TAXID:161934	Silymarin
Q92887	-	TAXID:180772	Quercetin
Q92887	-	TAXID:180772	Resveratrol
Q92887	-	TAXID:13427	Quercetin
Q92887	-	TAXID:94328	Apigenin
Q92887	-	TAXID:4222	Quercetin
Q92887	-	TAXID:4498	Nicotine
Q92887	-	TAXID:4530	Quercetin
Q92887	-	TAXID:120290	Quercetin
Q92887	-	TAXID:120290	Naringenin
Q92887	-	TAXID:74645	Quercetin
Q92887	-	TAXID:22663	Quercetin
Q92887	-	TAXID:3847	Apigenin
Q92887	-	TAXID:3847	Genistein
Q92887	-	TAXID:3847	Quercetin
Q92887	-	TAXID:3847	Naringenin
Q92887	-	TAXID:3847	Tryptophan
Q92887	-	TAXID:3847	Sodium Cholate
Q92887	-	TAXID:3711	Quercetin
Q92887	-	TAXID:3711	2-Phenylethylisothiocyanate
Q92887	-	TAXID:3711	Tryptophan
Q92887	-	TAXID:3711	Resveratrol
Q92887	-	TAXID:3659	Quercetin
Q92887	-	TAXID:3712	Quercetin
Q92887	-	TAXID:4113	Tryptophan
Q92887	DB00836	-	-
Q92887	DB00150	-	-
Q92887	DB00834	-	-
Q92887	DB00783	-	-
Q92887	DB04574	-	-
Q92887	DB00788	-	-
Q92887	DB00390	-	-
Q92887	DB00424	-	-
Q92887	DB00650	-	-
Q92887	DB00709	-	-
Q92887	DB00541	-	-
Q92887	DB00252	-	-
Q92887	DB01016	-	-
Q92887	DB00257	-	-
Q92887	DB00255	-	-
Q92887	DB00313	-	-
Q92887	DB00317	-	-
Q92887	DB00091	-	-
Q92887	DB01197	-	-
Q92887	DB00421	-	-
Q92887	DB00624	-	-
Q92887	DB00499	-	-
Q92887	DB00143	-	-
Q92887	DB00934	-	-
Q92887	DB01156	-	-
Q92887	DB00622	-	-
Q92887	DB00625	-	-
Q92887	DB01140	-	-
Q92887	DB01009	-	-
Q92887	DB00530	-	-
Q92887	DB00300	-	-
Q92887	DB00301	-	-
Q92887	DB00227	-	-
Q92887	DB00224	-	-
Q92887	DB00222	-	-
Q92887	DB01394	-	-
Q92887	DB00762	-	-
Q92887	DB00177	-	-
Q92887	DB00175	-	-
Q92887	DB01601	-	-
Q92887	DB01165	-	-
Q92887	DB00396	-	-
Q92887	DB01162	-	-
Q92887	DB00679	-	-
Q92887	DB00563	-	-
Q92887	DB00564	-	-
Q92887	DB02703	-	-
Q92887	DB00373	-	-
Q92887	DB00705	-	-
Q92887	DB01326	-	-
Q92887	DB00795	-	-
Q92887	DB00641	-	-
Q92887	DB01067	-	-
Q92887	DB00280	-	-
Q92887	DB00554	-	-
Q92887	DB01174	-	-
Q92887	DB01222	-	-
Q92887	DB00244	-	-
Q92887	DB00489	-	-
Q92887	DB00951	-	-
Q92887	DB00950	-	-
Q92887	DB00613	-	-
Q92887	DB00977	-	-
Q92887	DB00975	-	-
Q92887	DB00635	-	-
Q92887	DB00502	-	-
Q92887	DB00503	-	-
Q92887	DB00619	-	-
Q92887	DB00741	-	-
Q92887	DB00602	-	-
Q92887	DB01053	-	-
Q92887	DB00698	-	-
Q92887	DB01050	-	-
Q92887	DB01054	-	-
Q92887	DB01182	-	-
Q92887	DB00468	-	-
Q92887	DB00694	-	-
Q92887	DB00695	-	-
Q92887	DB00682	-	-
Q92887	DB00193	-	-
Q92887	DB00495	-	-
Q92887	DB00356	-	-
Q92887	DB00199	-	-
Q92887	DB00712	-	-
Q92887	DB00860	-	-
Q92887	DB00863	-	-
Q92887	DB00867	-	-
Q92887	DB01208	-	-
Q92887	DB01048	-	-
Q92887	DB01586	-	-
Q92887	DB01202	-	-
Q92887	DB01045	-	-
Q92887	DB01118	-	-
Q92887	DB01204	-	-
Q92887	DB00477	-	-
Q92887	DB00661	-	-
Q92887	DB00577	-	-
Q92887	DB01076	-	-
Q92887	DB00572	-	-
Q92887	DB00571	-	-
Q92887	DB00570	-	-
Q92887	DB00184	-	-
Q92887	DB00264	-	-
Q92887	DB00342	-	-
Q92887	DB00343	-	-
Q92887	DB00345	-	-
Q92887	DB00583	-	-
Q92887	DB00879	-	-
Q92887	DB00586	-	-
Q92887	DB00585	-	-
Q92887	DB00675	-	-
Q92887	DB00915	-	-
Q92887	DB00914	-	-
Q92887	DB00637	-	-
Q92887	DB00911	-	-
Q92887	DB00842	-	-
Q92887	DB01120	-	-
Q92887	DB01232	-	-
Q92887	DB00387	-	-
Q92887	DB00722	-	-
Q92887	DB01032	-	-
Q92887	DB00275	-	-
Q92887	DB00445	-	-
Q92887	DB01039	-	-
Q92887	DB01239	-	-
Q92887	DB00440	-	-
Q92887	DB00238	-	-
Q92887	DB00270	-	-
Q92887	DB00773	-	-
Q92887	DB01137	-	-
Q92887	DB00289	-	-
Q92887	DB00608	-	-
Q92887	DB01151	-	-
Q92887	DB00515	-	-
Q92887	DB00514	-	-
Q92887	DB00908	-	-
Q92887	DB01026	-	-
Q92887	DB00328	-	-
Q92887	DB01023	-	-
Q92887	DB00482	-	-
Q92887	DB01346	-	-
Q92887	DB00759	-	-
Q92887	DB00321	-	-
Q92887	DB01435	-	-
Q92887	DB00455	-	-
Q92887	DB00457	-	-
Q92887	DB00206	-	-
Q92887	DB00999	-	-
Q92887	DB00997	-	-
Q92887	DB06777	-	-
P08183	-	TAXID:3711	Resveratrol
P08183	-	TAXID:4565	Resveratrol
P08183	-	TAXID:180772	Resveratrol
P08183	-	TAXID:3818	Resveratrol
P08183	-	TAXID:29760	Resveratrol
P08183	-	TAXID:3621	Resveratrol
P08183	-	TAXID:4081	Resveratrol
P08183	-	TAXID:175228	Resveratrol
P08183	-	TAXID:4442	Resveratrol
P08183	-	TAXID:3747	Resveratrol
P08183	DB00836	-	-
P08183	DB04573	-	-
P08183	DB00834	-	-
P08183	DB00783	-	-
P08183	DB01149	-	-
P08183	DB00831	-	-
P08183	DB00656	-	-
P08183	DB00936	-	-
P08183	DB00390	-	-
P08183	DB00396	-	-
P08183	DB00279	-	-
P08183	DB01142	-	-
P08183	DB00708	-	-
P08183	DB00545	-	-
P08183	DB01253	-	-
P08183	DB00541	-	-
P08183	DB00252	-	-
P08183	DB00701	-	-
P08183	DB00704	-	-
P08183	DB00257	-	-
P08183	DB00255	-	-
P08183	DB00320	-	-
P08183	DB00316	-	-
P08183	DB00934	-	-
P08183	DB00091	-	-
P08183	DB00318	-	-
P08183	DB01197	-	-
P08183	DB00655	-	-
P08183	DB01211	-	-
P08183	DB00490	-	-
P08183	DB00571	-	-
P08183	DB00882	-	-
P08183	DB00384	-	-
P08183	DB00295	-	-
P08183	DB00381	-	-
P08183	DB01086	-	-
P08183	DB00623	-	-
P08183	DB00622	-	-
P08183	DB00972	-	-
P08183	DB00625	-	-
P08183	DB00624	-	-
P08183	DB00734	-	-
P08183	DB01244	-	-
P08183	DB00530	-	-
P08183	DB00731	-	-
P08183	DB00305	-	-
P08183	DB00539	-	-
P08183	DB01248	-	-
P08183	DB00371	-	-
P08183	DB00227	-	-
P08183	DB00224	-	-
P08183	DB00220	-	-
P08183	DB01394	-	-
P08183	DB01396	-	-
P08183	DB01050	-	-
P08183	DB01392	-	-
P08183	DB06144	-	-
P08183	DB00345	-	-
P08183	DB00451	-	-
P08183	DB00762	-	-
P08183	DB01607	-	-
P08183	DB01072	-	-
P08183	DB00176	-	-
P08183	DB00175	-	-
P08183	DB01601	-	-
P08183	DB01167	-	-
P08183	DB01165	-	-
P08183	DB01137	-	-
P08183	DB00675	-	-
P08183	DB01016	-	-
P08183	DB00276	-	-
P08183	DB00563	-	-
P08183	DB00564	-	-
P08183	DB01183	-	-
P08183	DB04840	-	-
P08183	DB01184	-	-
P08183	DB00373	-	-
P08183	DB00705	-	-
P08183	DB00285	-	-
P08183	DB01287	-	-
P08183	DB00967	-	-
P08183	DB01069	-	-
P08183	DB00382	-	-
P08183	DB00584	-	-
P08183	DB06155	-	-
P08183	DB00790	-	-
P08183	DB00515	-	-
P08183	DB00641	-	-
P08183	DB00643	-	-
P08183	DB00514	-	-
P08183	DB00215	-	-
P08183	DB01174	-	-
P08183	DB01175	-	-
P08183	DB00982	-	-
P08183	DB00717	-	-
P08183	DB00715	-	-
P08183	DB01264	-	-
P08183	DB01203	-	-
P08183	DB00246	-	-
P08183	DB00458	-	-
P08183	DB00365	-	-
P08183	DB00363	-	-
P08183	DB00361	-	-
P08183	DB01435	-	-
P08183	DB00328	-	-
P08183	DB00959	-	-
P08183	DB00950	-	-
P08183	DB06712	-	-
P08183	DB01200	-	-
P08183	DB01100	-	-
P08183	DB00508	-	-
P08183	DB00970	-	-
P08183	DB00977	-	-
P08183	DB01104	-	-
P08183	DB00975	-	-
P08183	DB00502	-	-
P08183	DB00503	-	-
P08183	DB01103	-	-
P08183	DB00619	-	-
P08183	DB00741	-	-
P08183	DB00742	-	-
P08183	DB01429	-	-
P08183	DB01054	-	-
P08183	DB00509	-	-
P08183	DB00690	-	-
P08183	DB01182	-	-
P08183	DB00696	-	-
P08183	DB00468	-	-
P08183	DB00694	-	-
P08183	DB00216	-	-
P08183	DB00196	-	-
P08183	DB00358	-	-
P08183	DB00356	-	-
P08183	DB00810	-	-
P08183	DB00199	-	-
P08183	DB00590	-	-
P08183	DB00829	-	-
P08183	DB00860	-	-
P08183	DB00863	-	-
P08183	DB01340	-	-
P08183	DB00864	-	-
P08183	DB00472	-	-
P08183	DB00866	-	-
P08183	DB01110	-	-
P08183	DB00813	-	-
P08183	DB01114	-	-
P08183	DB01115	-	-
P08183	DB01202	-	-
P08183	DB01045	-	-
P08183	DB01118	-	-
P08183	DB01595	-	-
P08183	DB00802	-	-
P08183	DB01204	-	-
P08183	DB01205	-	-
P08183	DB00477	-	-
P08183	DB01361	-	-
P08183	DB00661	-	-
P08183	DB01193	-	-
P08183	DB00575	-	-
P08183	DB01076	-	-
P08183	DB01196	-	-
P08183	DB06216	-	-
P08183	DB00669	-	-
P08183	DB00570	-	-
P08183	DB00264	-	-
P08183	DB00342	-	-
P08183	DB00343	-	-
P08183	DB00344	-	-
P08183	DB00672	-	-
P08183	DB00586	-	-
P08183	DB01297	-	-
P08183	DB00945	-	-
P08183	DB00877	-	-
P08183	DB01162	-	-
P08183	DB00915	-	-
P08183	DB00635	-	-
P08183	DB00637	-	-
P08183	DB00537	-	-
P08183	DB00912	-	-
P08183	DB01032	-	-
P08183	DB00520	-	-
P08183	DB01208	-	-
P08183	DB00333	-	-
P08183	DB00523	-	-
P08183	DB00726	-	-
P08183	DB01232	-	-
P08183	DB01037	-	-
P08183	DB00722	-	-
P08183	DB01030	-	-
P08183	DB00335	-	-
P08183	DB01234	-	-
P08183	DB00445	-	-
P08183	DB01238	-	-
P08183	DB00443	-	-
P08183	DB01239	-	-
P08183	DB00441	-	-
P08183	DB00440	-	-
P08183	DB00238	-	-
P08183	DB00845	-	-
P08183	DB01400	-	-
P08183	DB00234	-	-
P08183	DB00334	-	-
P08183	DB00433	-	-
P08183	DB00773	-	-
P08183	DB06700	-	-
P08183	DB00518	-	-
P08183	DB01136	-	-
P08183	DB00602	-	-
P08183	DB01229	-	-
P08183	DB00421	-	-
P08183	DB01224	-	-
P08183	DB00608	-	-
P08183	DB01151	-	-
P08183	DB00281	-	-
P08183	DB01221	-	-
P08183	DB00908	-	-
P08183	DB01026	-	-
P08183	DB00751	-	-
P08183	DB01023	-	-
P08183	DB00755	-	-
P08183	DB01346	-	-
P08183	DB00683	-	-
P08183	DB00321	-	-
P08183	DB00454	-	-
P08183	DB00455	-	-
P08183	DB00457	-	-
P08183	DB00207	-	-
P08183	DB00206	-	-
P08183	DB00201	-	-
P08183	DB00532	-	-
P08183	DB00997	-	-
P08183	DB00531	-	-
P08183	DB00747	-	-
P08183	DB00401	-	-
P08183	DB01242	-	-
P08183	DB01339	-	-
P23975	-	TAXID:13216	Paroxetine
P23975	-	TAXID:3469	Tramadol
P23975	DB01064	-	-
P23975	DB01097	-	-
P23975	DB00153	-	-
P23975	DB00709	-	-
P23975	DB00258	-	-
P23975	DB00259	-	-
P23975	DB00252	-	-
P23975	DB00701	-	-
P23975	DB00251	-	-
P23975	DB00704	-	-
P23975	DB00257	-	-
P23975	DB00254	-	-
P23975	DB00255	-	-
P23975	DB00313	-	-
P23975	DB00310	-	-
P23975	DB00316	-	-
P23975	DB00091	-	-
P23975	DB00319	-	-
P23975	DB00478	-	-
P23975	DB00570	-	-
P23975	DB00882	-	-
P23975	DB01156	-	-
P23975	DB01151	-	-
P23975	DB00650	-	-
P23975	DB00227	-	-
P23975	DB00224	-	-
P23975	DB00222	-	-
P23975	DB00220	-	-
P23975	DB00962	-	-
P23975	DB06710	-	-
P23975	DB03255	-	-
P23975	DB00178	-	-
P23975	DB01075	-	-
P23975	DB01074	-	-
P23975	DB01077	-	-
P23975	DB01076	-	-
P23975	DB00672	-	-
P23975	DB00674	-	-
P23975	DB00675	-	-
P23975	DB00679	-	-
P23975	DB01275	-	-
P23975	DB00795	-	-
P23975	DB00794	-	-
P23975	DB00793	-	-
P23975	DB00823	-	-
P23975	DB00822	-	-
P23975	DB00415	-	-
P23975	DB00829	-	-
P23975	DB00411	-	-
P23975	DB00412	-	-
P23975	DB00798	-	-
P23975	DB00555	-	-
P23975	DB00554	-	-
P23975	DB00550	-	-
P23975	DB00553	-	-
P23975	DB01576	-	-
P23975	DB00959	-	-
P23975	DB00489	-	-
P23975	DB00488	-	-
P23975	DB00483	-	-
P23975	DB00950	-	-
P23975	DB00481	-	-
P23975	DB00487	-	-
P23975	DB00484	-	-
P23975	DB01103	-	-
P23975	DB01105	-	-
P23975	DB01104	-	-
P23975	DB00214	-	-
P23975	DB00215	-	-
P23975	DB00359	-	-
P23975	DB00357	-	-
P23975	DB00356	-	-
P23975	DB00353	-	-
P23975	DB00350	-	-
P23975	DB01208	-	-
P23975	DB01203	-	-
P23975	DB01200	-	-
P23975	DB01201	-	-
P23975	DB01611	-	-
P23975	DB01204	-	-
P23975	DB01205	-	-
P23975	DB01199	-	-
P23975	DB01193	-	-
P23975	DB01190	-	-
P23975	DB01191	-	-
P23975	DB01197	-	-
P23975	DB01299	-	-
P23975	DB00915	-	-
P23975	DB00384	-	-
P23975	DB00916	-	-
P23975	DB00911	-	-
P23975	DB00529	-	-
P23975	DB00524	-	-
P23975	DB00525	-	-
P23975	DB00919	-	-
P23975	DB00523	-	-
P23975	DB01035	-	-
P23975	DB01037	-	-
P23975	DB01036	-	-
P23975	DB01408	-	-
P23975	DB01030	-	-
P23975	DB01032	-	-
P23975	DB01406	-	-
P23975	DB01407	-	-
P23975	DB01400	-	-
P23975	DB00846	-	-
P23975	DB01039	-	-
P23975	DB00951	-	-
P23975	DB00289	-	-
P23975	DB00421	-	-
P23975	DB00285	-	-
P23975	DB00284	-	-
P23975	DB00281	-	-
P23975	DB00283	-	-
P23975	DB00389	-	-
P23975	DB00458	-	-
P23975	DB00328	-	-
P23975	DB00750	-	-
P23975	DB00756	-	-
P23975	DB00755	-	-
P23975	DB00322	-	-
P23975	DB00320	-	-
P23975	DB00758	-	-
P23975	DB00455	-	-
P23975	DB00324	-	-
P23975	DB00457	-	-
P23975	DB04571	-	-
P23975	DB00859	-	-
P23975	DB00857	-	-
P23975	DB00850	-	-
P23975	DB00851	-	-
P23975	DB00780	-	-
P23975	DB00428	-	-
P23975	DB00834	-	-
P23975	DB00783	-	-
P23975	DB00784	-	-
P23975	DB00939	-	-
P23975	DB00831	-	-
P23975	DB00393	-	-
P23975	DB00789	-	-
P23975	DB00935	-	-
P23975	DB00422	-	-
P23975	DB00424	-	-
P23975	DB00394	-	-
P23975	DB00547	-	-
P23975	DB00544	-	-
P23975	DB00542	-	-
P23975	DB00543	-	-
P23975	DB00540	-	-
P23975	DB01018	-	-
P23975	DB01016	-	-
P23975	DB01015	-	-
P23975	DB01014	-	-
P23975	DB01011	-	-
P23975	DB00549	-	-
P23975	DB00233	-	-
P23975	DB00495	-	-
P23975	DB00490	-	-
P23975	DB00493	-	-
P23975	DB08826	-	-
P23975	DB00498	-	-
P23975	DB00499	-	-
P23975	DB00321	-	-
P23975	DB00945	-	-
P23975	DB00734	-	-
P23975	DB00731	-	-
P23975	DB00309	-	-
P23975	DB00733	-	-
P23975	DB00305	-	-
P23975	DB00738	-	-
P23975	DB00302	-	-
P23975	DB01606	-	-
P23975	DB01167	-	-
P23975	DB01166	-	-
P23975	DB01165	-	-
P23975	DB01162	-	-
P23975	DB00426	-	-
P23975	DB01168	-	-
P23975	DB01287	-	-
P23975	DB06697	-	-
P23975	DB01068	-	-
P23975	DB01069	-	-
P23975	DB00649	-	-
P23975	DB00648	-	-
P23975	DB00163	-	-
P23975	DB01062	-	-
P23975	DB01060	-	-
P23975	DB01061	-	-
P23975	DB00641	-	-
P23975	DB01067	-	-
P23975	DB00643	-	-
P23975	DB01065	-	-
P23975	DB01357	-	-
P23975	DB00749	-	-
P23975	DB00298	-	-
P23975	DB00744	-	-
P23975	DB00297	-	-
P23975	DB00740	-	-
P23975	DB00741	-	-
P23975	DB00742	-	-
P23975	DB00291	-	-
P23975	DB00465	-	-
P23975	DB00450	-	-
P23975	DB00467	-	-
P23975	DB00461	-	-
P23975	DB00462	-	-
P23975	DB00469	-	-
P23975	DB00452	-	-
P23975	DB00196	-	-
P23975	DB00190	-	-
P23975	DB00193	-	-
P23975	DB00199	-	-
P23975	DB00861	-	-
P23975	DB00860	-	-
P23975	DB00863	-	-
P23975	DB00325	-	-
P23975	DB00864	-	-
P23975	DB01113	-	-
P23975	DB01110	-	-
P23975	DB01114	-	-
P23975	DB01115	-	-
P23975	DB00177	-	-
P23975	DB01118	-	-
P23975	DB01119	-	-
P23975	DB00175	-	-
P23975	DB00263	-	-
P23975	DB00262	-	-
P23975	DB00266	-	-
P23975	DB00265	-	-
P23975	DB00264	-	-
P23975	DB00342	-	-
P23975	DB00343	-	-
P23975	DB00344	-	-
P23975	DB00347	-	-
P23975	DB00423	-	-
P23975	DB00635	-	-
P23975	DB00636	-	-
P23975	DB00637	-	-
P23975	DB00630	-	-
P23975	DB01233	-	-
P23975	DB01232	-	-
P23975	DB01231	-	-
P23975	DB01235	-	-
P23975	DB01234	-	-
P23975	DB00104	-	-
P23975	DB00518	-	-
P23975	DB00904	-	-
P23975	DB01047	-	-
P23975	DB00903	-	-
P23975	DB00513	-	-
P23975	DB00512	-	-
P23975	DB00515	-	-
P23975	DB00514	-	-
P23975	DB01026	-	-
P23975	DB00688	-	-
P23975	DB00122	-	-
P23975	DB01023	-	-
P23975	DB00126	-	-
P23975	DB01021	-	-
P23975	DB00681	-	-
P23975	DB00682	-	-
P23975	DB01435	-	-
P23975	DB00684	-	-
P23975	DB01436	-	-
P23975	DB00999	-	-
P23975	DB00995	-	-
P23975	DB00994	-	-
P23975	DB00997	-	-
P23975	DB00996	-	-
P23975	DB00991	-	-
P23975	DB04552	-	-
P23975	DB04573	-	-
P23975	DB00836	-	-
P23975	DB01095	-	-
P23975	DB01092	-	-
P23975	DB01091	-	-
P23975	DB00656	-	-
P23975	DB00655	-	-
P23975	DB01099	-	-
P23975	DB00651	-	-
P23975	DB01253	-	-
P23975	DB00166	-	-
P23975	DB00788	-	-
P23975	DB00420	-	-
P23975	DB01380	-	-
P23975	DB00391	-	-
P23975	DB00928	-	-
P23975	DB00841	-	-
P23975	DB00390	-	-
P23975	DB00381	-	-
P23975	DB00382	-	-
P23975	DB00844	-	-
P23975	DB00920	-	-
P23975	DB00433	-	-
P23975	DB00848	-	-
P23975	DB00437	-	-
P23975	DB00434	-	-
P23975	DB00396	-	-
P23975	DB01008	-	-
P23975	DB01009	-	-
P23975	DB00531	-	-
P23975	DB00537	-	-
P23975	DB01001	-	-
P23975	DB01002	-	-
P23975	DB01003	-	-
P23975	DB01005	-	-
P23975	DB01006	-	-
P23975	DB00541	-	-
P23975	DB00279	-	-
P23975	DB00274	-	-
P23975	DB00418	-	-
P23975	DB00277	-	-
P23975	DB00271	-	-
P23975	DB00376	-	-
P23975	DB00373	-	-
P23975	DB00379	-	-
P23975	DB06150	-	-
P23975	DB01171	-	-
P23975	DB01172	-	-
P23975	DB01173	-	-
P23975	DB01174	-	-
P23975	DB01175	-	-
P23975	DB01176	-	-
P23975	DB01177	-	-
P23975	DB01179	-	-
P23975	DB00970	-	-
P23975	DB00977	-	-
P23975	DB00975	-	-
P23975	DB00502	-	-
P23975	DB00503	-	-
P23975	DB00500	-	-
P23975	DB00978	-	-
P23975	DB01581	-	-
P23975	DB01582	-	-
P23975	DB01053	-	-
P23975	DB00698	-	-
P23975	DB01050	-	-
P23975	DB01056	-	-
P23975	DB01055	-	-
P23975	DB01054	-	-
P23975	DB00692	-	-
P23975	DB01351	-	-
P23975	DB01059	-	-
P23975	DB01058	-	-
P23975	DB00696	-	-
P23975	DB01427	-	-
P23975	DB00694	-	-
P23975	DB00695	-	-
P23975	DB00988	-	-
P23975	DB00987	-	-
P23975	DB00982	-	-
P23975	DB00981	-	-
P23975	DB00591	-	-
P23975	DB00590	-	-
P23975	DB00593	-	-
P23975	DB00595	-	-
P23975	DB00598	-	-
P23975	DB00778	-	-
P23975	DB00809	-	-
P23975	DB00808	-	-
P23975	DB00807	-	-
P23975	DB00806	-	-
P23975	DB00773	-	-
P23975	DB00804	-	-
P23975	DB00776	-	-
P23975	DB00476	-	-
P23975	DB00477	-	-
P23975	DB00472	-	-
P23975	DB00579	-	-
P23975	DB00471	-	-
P23975	DB00577	-	-
P23975	DB00576	-	-
P23975	DB00575	-	-
P23975	DB00573	-	-
P23975	DB00572	-	-
P23975	DB00571	-	-
P23975	DB00479	-	-
P23975	DB00186	-	-
P23975	DB00187	-	-
P23975	DB00184	-	-
P23975	DB00182	-	-
P23975	DB00180	-	-
P23975	DB00181	-	-
P23975	DB00871	-	-
P23975	DB00877	-	-
P23975	DB00874	-	-
P23975	DB01128	-	-
P23975	DB01121	-	-
P23975	DB01120	-	-
P23975	DB01127	-	-
P23975	DB01125	-	-
P23975	DB00330	-	-
P23975	DB00238	-	-
P23975	DB00239	-	-
P23975	DB00443	-	-
P23975	DB01087	-	-
P23975	DB00234	-	-
P23975	DB00235	-	-
P23975	DB06701	-	-
P23975	DB00600	-	-
P23975	DB00602	-	-
P23975	DB00604	-	-
P23975	DB01224	-	-
P23975	DB01221	-	-
P23975	DB01222	-	-
P23975	DB01223	-	-
P23975	DB00898	-	-
P23975	DB00482	-	-
P23975	DB00936	-	-
P23975	DB01339	-	-
P23975	DB00730	-	-
P23975	DB01149	-	-
P23975	DB01148	-	-
P23975	DB01147	-	-
P23975	DB01143	-	-
P23975	DB01142	-	-
P23975	DB00934	-	-
P23975	DB01082	-	-
P23975	DB00839	-	-
P23975	DB01086	-	-
P23975	DB00145	-	-
P23975	DB00623	-	-
P23975	DB00620	-	-
P23975	DB00627	-	-
P23975	DB00624	-	-
P23975	DB01242	-	-
P23975	DB01241	-	-
P23975	DB01248	-	-
P23975	DB01394	-	-
P23975	DB01396	-	-
P23975	DB06148	-	-
P23975	DB00169	-	-
P23975	DB01392	-	-
P23975	DB01393	-	-
P23975	DB06147	-	-
P23975	DB01399	-	-
P23975	DB00818	-	-
P23975	DB00819	-	-
P23975	DB00762	-	-
P23975	DB00763	-	-
P23975	DB00812	-	-
P23975	DB00814	-	-
P23975	DB00765	-	-
P23975	DB00568	-	-
P23975	DB00401	-	-
P23975	DB00400	-	-
P23975	DB00406	-	-
P23975	DB00404	-	-
P23975	DB00561	-	-
P23975	DB00563	-	-
P23975	DB00564	-	-
P23975	DB04841	-	-
P23975	DB00567	-	-
P23975	DB00759	-	-
P23975	DB01426	-	-
P23975	DB00884	-	-
P23975	DB00968	-	-
P23975	DB00969	-	-
P23975	DB00881	-	-
P23975	DB00967	-	-
P23975	DB00960	-	-
P23975	DB00961	-	-
P23975	DB00889	-	-
P23975	DB00963	-	-
P23975	DB06729	-	-
P23975	DB00249	-	-
P23975	DB00717	-	-
P23975	DB00715	-	-
P23975	DB00242	-	-
P23975	DB00245	-	-
P23975	DB00712	-	-
P23975	DB00247	-	-
P23975	DB00367	-	-
P23975	DB00365	-	-
P23975	DB00363	-	-
P23975	DB00361	-	-
P23975	DB01024	-	-
P23975	DB00368	-	-
P23975	DB03166	-	-
P23975	DB00614	-	-
P23975	DB00615	-	-
P23975	DB01211	-	-
P23975	DB01210	-	-
P23975	DB01213	-	-
P23975	DB00619	-	-
P23975	DB01217	-	-
P23975	DB01216	-	-
P23975	DB06698	-	-
P23975	DB01188	-	-
P23975	DB01627	-	-
P23975	DB01181	-	-
P23975	DB06691	-	-
P23975	DB01183	-	-
P23975	DB01182	-	-
P23975	DB01184	-	-
P23975	DB01186	-	-
P23975	DB00685	-	-
P23975	DB04896	-	-
P23975	DB00811	-	-
P23975	DB01029	-	-
P23975	DB00760	-	-
P23975	DB08807	-	-
P23975	DB04838	-	-
P23975	DB01599	-	-
P23975	DB01044	-	-
P23975	DB01045	-	-
P23975	DB01229	-	-
P23975	DB01595	-	-
P23975	DB01041	-	-
P23975	DB01042	-	-
P23975	DB00661	-	-
P23975	DB00669	-	-
P23975	DB00668	-	-
P23975	DB00583	-	-
P23975	DB00586	-	-
P23975	DB00584	-	-
P23975	DB00585	-	-
P23975	DB08797	-	-
P23975	DB00589	-	-
P23975	DB00339	-	-
P23975	DB00724	-	-
P23975	DB00725	-	-
P23975	DB00722	-	-
P23975	DB00721	-	-
P23975	DB00331	-	-
P23975	DB00446	-	-
P23975	DB00445	-	-
P23975	DB00335	-	-
P23975	DB00334	-	-
P23975	DB00441	-	-
P23975	DB01136	-	-
P23975	DB01137	-	-
P23975	DB01132	-	-
P23975	DB01206	-	-
P23975	DB00207	-	-
P23975	DB00206	-	-
P23975	DB00201	-	-
P23975	DB00202	-	-
P23975	DB00208	-	-
P23975	DB06770	-	-
P31645	-	TAXID:13216	Paroxetine
P31645	-	TAXID:3469	Tramadol
P31645	DB01064	-	-
P31645	DB01097	-	-
P31645	DB00153	-	-
P31645	DB00709	-	-
P31645	DB00258	-	-
P31645	DB00259	-	-
P31645	DB00252	-	-
P31645	DB00701	-	-
P31645	DB00251	-	-
P31645	DB00704	-	-
P31645	DB00257	-	-
P31645	DB00254	-	-
P31645	DB00255	-	-
P31645	DB00313	-	-
P31645	DB00310	-	-
P31645	DB00316	-	-
P31645	DB00091	-	-
P31645	DB00319	-	-
P31645	DB00478	-	-
P31645	DB00570	-	-
P31645	DB00882	-	-
P31645	DB01156	-	-
P31645	DB01151	-	-
P31645	DB00650	-	-
P31645	DB00227	-	-
P31645	DB00224	-	-
P31645	DB00222	-	-
P31645	DB00220	-	-
P31645	DB00962	-	-
P31645	DB06710	-	-
P31645	DB03255	-	-
P31645	DB00178	-	-
P31645	DB01075	-	-
P31645	DB00176	-	-
P31645	DB01077	-	-
P31645	DB01076	-	-
P31645	DB00672	-	-
P31645	DB00674	-	-
P31645	DB00675	-	-
P31645	DB00679	-	-
P31645	DB01275	-	-
P31645	DB00795	-	-
P31645	DB00794	-	-
P31645	DB00793	-	-
P31645	DB00823	-	-
P31645	DB00822	-	-
P31645	DB00415	-	-
P31645	DB00829	-	-
P31645	DB00411	-	-
P31645	DB00412	-	-
P31645	DB00798	-	-
P31645	DB00555	-	-
P31645	DB00554	-	-
P31645	DB00550	-	-
P31645	DB00553	-	-
P31645	DB01576	-	-
P31645	DB00959	-	-
P31645	DB00489	-	-
P31645	DB00488	-	-
P31645	DB00483	-	-
P31645	DB00950	-	-
P31645	DB00481	-	-
P31645	DB00487	-	-
P31645	DB00484	-	-
P31645	DB01100	-	-
P31645	DB01103	-	-
P31645	DB01105	-	-
P31645	DB01104	-	-
P31645	DB00214	-	-
P31645	DB00215	-	-
P31645	DB00359	-	-
P31645	DB00357	-	-
P31645	DB00356	-	-
P31645	DB00353	-	-
P31645	DB00350	-	-
P31645	DB01208	-	-
P31645	DB01203	-	-
P31645	DB01200	-	-
P31645	DB01201	-	-
P31645	DB01611	-	-
P31645	DB01204	-	-
P31645	DB01205	-	-
P31645	DB01199	-	-
P31645	DB01193	-	-
P31645	DB01190	-	-
P31645	DB01191	-	-
P31645	DB01197	-	-
P31645	DB01299	-	-
P31645	DB00915	-	-
P31645	DB00384	-	-
P31645	DB00916	-	-
P31645	DB00911	-	-
P31645	DB00529	-	-
P31645	DB00524	-	-
P31645	DB00525	-	-
P31645	DB00919	-	-
P31645	DB00523	-	-
P31645	DB01035	-	-
P31645	DB01037	-	-
P31645	DB01408	-	-
P31645	DB01030	-	-
P31645	DB01032	-	-
P31645	DB01406	-	-
P31645	DB01407	-	-
P31645	DB01400	-	-
P31645	DB00846	-	-
P31645	DB01039	-	-
P31645	DB00951	-	-
P31645	DB00289	-	-
P31645	DB00421	-	-
P31645	DB00285	-	-
P31645	DB00284	-	-
P31645	DB00281	-	-
P31645	DB00283	-	-
P31645	DB00437	-	-
P31645	DB00458	-	-
P31645	DB00328	-	-
P31645	DB00750	-	-
P31645	DB00756	-	-
P31645	DB00755	-	-
P31645	DB00322	-	-
P31645	DB00320	-	-
P31645	DB00758	-	-
P31645	DB00455	-	-
P31645	DB00324	-	-
P31645	DB00457	-	-
P31645	DB04571	-	-
P31645	DB00859	-	-
P31645	DB00857	-	-
P31645	DB00850	-	-
P31645	DB00851	-	-
P31645	DB00780	-	-
P31645	DB00428	-	-
P31645	DB00834	-	-
P31645	DB00783	-	-
P31645	DB00784	-	-
P31645	DB00939	-	-
P31645	DB00831	-	-
P31645	DB00393	-	-
P31645	DB00789	-	-
P31645	DB00935	-	-
P31645	DB00422	-	-
P31645	DB00424	-	-
P31645	DB00394	-	-
P31645	DB00547	-	-
P31645	DB00544	-	-
P31645	DB00542	-	-
P31645	DB00543	-	-
P31645	DB00540	-	-
P31645	DB01018	-	-
P31645	DB01016	-	-
P31645	DB01015	-	-
P31645	DB01014	-	-
P31645	DB01011	-	-
P31645	DB00549	-	-
P31645	DB00233	-	-
P31645	DB00495	-	-
P31645	DB00490	-	-
P31645	DB00493	-	-
P31645	DB08826	-	-
P31645	DB00498	-	-
P31645	DB00499	-	-
P31645	DB00321	-	-
P31645	DB00945	-	-
P31645	DB00734	-	-
P31645	DB00731	-	-
P31645	DB00309	-	-
P31645	DB00733	-	-
P31645	DB00305	-	-
P31645	DB00738	-	-
P31645	DB00302	-	-
P31645	DB01606	-	-
P31645	DB01167	-	-
P31645	DB01166	-	-
P31645	DB01165	-	-
P31645	DB01162	-	-
P31645	DB00426	-	-
P31645	DB01229	-	-
P31645	DB01287	-	-
P31645	DB06697	-	-
P31645	DB01068	-	-
P31645	DB01069	-	-
P31645	DB00649	-	-
P31645	DB00648	-	-
P31645	DB00163	-	-
P31645	DB01062	-	-
P31645	DB01060	-	-
P31645	DB01061	-	-
P31645	DB00641	-	-
P31645	DB01067	-	-
P31645	DB00643	-	-
P31645	DB01065	-	-
P31645	DB01357	-	-
P31645	DB00749	-	-
P31645	DB00298	-	-
P31645	DB00744	-	-
P31645	DB00297	-	-
P31645	DB00740	-	-
P31645	DB00741	-	-
P31645	DB00742	-	-
P31645	DB00291	-	-
P31645	DB00465	-	-
P31645	DB00450	-	-
P31645	DB00467	-	-
P31645	DB00461	-	-
P31645	DB00462	-	-
P31645	DB00469	-	-
P31645	DB00452	-	-
P31645	DB00196	-	-
P31645	DB00190	-	-
P31645	DB00193	-	-
P31645	DB00199	-	-
P31645	DB00861	-	-
P31645	DB00860	-	-
P31645	DB00863	-	-
P31645	DB00325	-	-
P31645	DB00864	-	-
P31645	DB01113	-	-
P31645	DB01110	-	-
P31645	DB01114	-	-
P31645	DB01115	-	-
P31645	DB00177	-	-
P31645	DB01118	-	-
P31645	DB01119	-	-
P31645	DB01074	-	-
P31645	DB00175	-	-
P31645	DB00263	-	-
P31645	DB00262	-	-
P31645	DB00266	-	-
P31645	DB00265	-	-
P31645	DB00264	-	-
P31645	DB00342	-	-
P31645	DB00343	-	-
P31645	DB00347	-	-
P31645	DB00423	-	-
P31645	DB00635	-	-
P31645	DB00636	-	-
P31645	DB00637	-	-
P31645	DB00630	-	-
P31645	DB01233	-	-
P31645	DB01232	-	-
P31645	DB01231	-	-
P31645	DB01235	-	-
P31645	DB01234	-	-
P31645	DB01238	-	-
P31645	DB00518	-	-
P31645	DB00904	-	-
P31645	DB01047	-	-
P31645	DB00903	-	-
P31645	DB00513	-	-
P31645	DB00512	-	-
P31645	DB00515	-	-
P31645	DB00514	-	-
P31645	DB01026	-	-
P31645	DB00688	-	-
P31645	DB00122	-	-
P31645	DB01023	-	-
P31645	DB00126	-	-
P31645	DB01021	-	-
P31645	DB00681	-	-
P31645	DB00682	-	-
P31645	DB01435	-	-
P31645	DB00684	-	-
P31645	DB01436	-	-
P31645	DB00999	-	-
P31645	DB00995	-	-
P31645	DB00994	-	-
P31645	DB00997	-	-
P31645	DB00996	-	-
P31645	DB00991	-	-
P31645	DB04552	-	-
P31645	DB04573	-	-
P31645	DB00836	-	-
P31645	DB01095	-	-
P31645	DB01092	-	-
P31645	DB01091	-	-
P31645	DB00656	-	-
P31645	DB00655	-	-
P31645	DB01099	-	-
P31645	DB00651	-	-
P31645	DB01253	-	-
P31645	DB00166	-	-
P31645	DB00788	-	-
P31645	DB00420	-	-
P31645	DB01380	-	-
P31645	DB00391	-	-
P31645	DB00928	-	-
P31645	DB00841	-	-
P31645	DB00390	-	-
P31645	DB00381	-	-
P31645	DB00382	-	-
P31645	DB00844	-	-
P31645	DB00920	-	-
P31645	DB00433	-	-
P31645	DB00848	-	-
P31645	DB00389	-	-
P31645	DB00434	-	-
P31645	DB00396	-	-
P31645	DB01008	-	-
P31645	DB01009	-	-
P31645	DB00531	-	-
P31645	DB00537	-	-
P31645	DB01001	-	-
P31645	DB01002	-	-
P31645	DB01003	-	-
P31645	DB01005	-	-
P31645	DB01006	-	-
P31645	DB00541	-	-
P31645	DB00279	-	-
P31645	DB00274	-	-
P31645	DB00418	-	-
P31645	DB00277	-	-
P31645	DB00271	-	-
P31645	DB00376	-	-
P31645	DB00373	-	-
P31645	DB00379	-	-
P31645	DB06150	-	-
P31645	DB01171	-	-
P31645	DB01172	-	-
P31645	DB01173	-	-
P31645	DB01174	-	-
P31645	DB01175	-	-
P31645	DB01176	-	-
P31645	DB01177	-	-
P31645	DB01179	-	-
P31645	DB00970	-	-
P31645	DB00977	-	-
P31645	DB00975	-	-
P31645	DB00502	-	-
P31645	DB00503	-	-
P31645	DB00500	-	-
P31645	DB00978	-	-
P31645	DB01581	-	-
P31645	DB01582	-	-
P31645	DB01053	-	-
P31645	DB00698	-	-
P31645	DB01050	-	-
P31645	DB01056	-	-
P31645	DB01055	-	-
P31645	DB01054	-	-
P31645	DB00692	-	-
P31645	DB01351	-	-
P31645	DB01059	-	-
P31645	DB01058	-	-
P31645	DB00696	-	-
P31645	DB01427	-	-
P31645	DB00694	-	-
P31645	DB00695	-	-
P31645	DB00988	-	-
P31645	DB00989	-	-
P31645	DB00987	-	-
P31645	DB00982	-	-
P31645	DB00981	-	-
P31645	DB00591	-	-
P31645	DB00590	-	-
P31645	DB00593	-	-
P31645	DB00595	-	-
P31645	DB00598	-	-
P31645	DB00778	-	-
P31645	DB00809	-	-
P31645	DB00808	-	-
P31645	DB00807	-	-
P31645	DB00806	-	-
P31645	DB00773	-	-
P31645	DB00804	-	-
P31645	DB00776	-	-
P31645	DB00476	-	-
P31645	DB00477	-	-
P31645	DB00472	-	-
P31645	DB00579	-	-
P31645	DB00471	-	-
P31645	DB00577	-	-
P31645	DB00576	-	-
P31645	DB00575	-	-
P31645	DB00573	-	-
P31645	DB00572	-	-
P31645	DB00571	-	-
P31645	DB00479	-	-
P31645	DB00186	-	-
P31645	DB00187	-	-
P31645	DB00184	-	-
P31645	DB00182	-	-
P31645	DB00180	-	-
P31645	DB00181	-	-
P31645	DB00871	-	-
P31645	DB00877	-	-
P31645	DB00874	-	-
P31645	DB01128	-	-
P31645	DB01121	-	-
P31645	DB01120	-	-
P31645	DB01127	-	-
P31645	DB01125	-	-
P31645	DB00330	-	-
P31645	DB00238	-	-
P31645	DB00239	-	-
P31645	DB00443	-	-
P31645	DB01087	-	-
P31645	DB00234	-	-
P31645	DB00235	-	-
P31645	DB06701	-	-
P31645	DB00600	-	-
P31645	DB00602	-	-
P31645	DB00604	-	-
P31645	DB01224	-	-
P31645	DB01221	-	-
P31645	DB01222	-	-
P31645	DB01223	-	-
P31645	DB00898	-	-
P31645	DB00482	-	-
P31645	DB06684	-	-
P31645	DB00936	-	-
P31645	DB01339	-	-
P31645	DB00730	-	-
P31645	DB01149	-	-
P31645	DB01148	-	-
P31645	DB01147	-	-
P31645	DB01143	-	-
P31645	DB01142	-	-
P31645	DB00934	-	-
P31645	DB01082	-	-
P31645	DB00839	-	-
P31645	DB01086	-	-
P31645	DB00145	-	-
P31645	DB00623	-	-
P31645	DB00620	-	-
P31645	DB00627	-	-
P31645	DB00624	-	-
P31645	DB01242	-	-
P31645	DB01241	-	-
P31645	DB01248	-	-
P31645	DB01394	-	-
P31645	DB01396	-	-
P31645	DB06148	-	-
P31645	DB00169	-	-
P31645	DB01392	-	-
P31645	DB01393	-	-
P31645	DB06147	-	-
P31645	DB01399	-	-
P31645	DB00818	-	-
P31645	DB00819	-	-
P31645	DB00762	-	-
P31645	DB00763	-	-
P31645	DB00812	-	-
P31645	DB00814	-	-
P31645	DB00765	-	-
P31645	DB00568	-	-
P31645	DB00401	-	-
P31645	DB00400	-	-
P31645	DB00406	-	-
P31645	DB00404	-	-
P31645	DB00561	-	-
P31645	DB00563	-	-
P31645	DB00564	-	-
P31645	DB04841	-	-
P31645	DB00567	-	-
P31645	DB00759	-	-
P31645	DB01426	-	-
P31645	DB00884	-	-
P31645	DB00968	-	-
P31645	DB00969	-	-
P31645	DB00881	-	-
P31645	DB00967	-	-
P31645	DB00960	-	-
P31645	DB00961	-	-
P31645	DB00889	-	-
P31645	DB00963	-	-
P31645	DB06729	-	-
P31645	DB00249	-	-
P31645	DB00717	-	-
P31645	DB00715	-	-
P31645	DB00242	-	-
P31645	DB00245	-	-
P31645	DB00712	-	-
P31645	DB00247	-	-
P31645	DB00246	-	-
P31645	DB00367	-	-
P31645	DB00365	-	-
P31645	DB00363	-	-
P31645	DB00361	-	-
P31645	DB01024	-	-
P31645	DB03166	-	-
P31645	DB00614	-	-
P31645	DB00615	-	-
P31645	DB01211	-	-
P31645	DB01210	-	-
P31645	DB01213	-	-
P31645	DB00619	-	-
P31645	DB01217	-	-
P31645	DB01216	-	-
P31645	DB06698	-	-
P31645	DB01188	-	-
P31645	DB01627	-	-
P31645	DB01181	-	-
P31645	DB06691	-	-
P31645	DB01183	-	-
P31645	DB01182	-	-
P31645	DB01184	-	-
P31645	DB01186	-	-
P31645	DB00685	-	-
P31645	DB04896	-	-
P31645	DB00811	-	-
P31645	DB01029	-	-
P31645	DB00760	-	-
P31645	DB08807	-	-
P31645	DB04838	-	-
P31645	DB01599	-	-
P31645	DB01044	-	-
P31645	DB01045	-	-
P31645	DB00104	-	-
P31645	DB01595	-	-
P31645	DB01041	-	-
P31645	DB01042	-	-
P31645	DB00206	-	-
P31645	DB00661	-	-
P31645	DB00669	-	-
P31645	DB00668	-	-
P31645	DB00583	-	-
P31645	DB00586	-	-
P31645	DB00584	-	-
P31645	DB00585	-	-
P31645	DB08797	-	-
P31645	DB00589	-	-
P31645	DB00339	-	-
P31645	DB00724	-	-
P31645	DB00725	-	-
P31645	DB00722	-	-
P31645	DB00721	-	-
P31645	DB00331	-	-
P31645	DB00446	-	-
P31645	DB00445	-	-
P31645	DB00335	-	-
P31645	DB00334	-	-
P31645	DB00441	-	-
P31645	DB01168	-	-
P31645	DB01136	-	-
P31645	DB01137	-	-
P31645	DB01132	-	-
P31645	DB01206	-	-
P31645	DB00207	-	-
P31645	DB06288	-	-
P31645	DB00201	-	-
P31645	DB00202	-	-
P31645	DB00208	-	-
P31645	DB06770	-	-
P43005	-	TAXID:3469	Glutamic Acid
P43005	DB00142	-	-
O94956	-	TAXID:4222	Quercetin
O94956	-	TAXID:29760	Quercetin
O94956	-	TAXID:74900	Quercetin
O94956	-	TAXID:4081	Quercetin
O94956	-	TAXID:4081	Naringenin
O94956	-	TAXID:4442	Quercetin
O94956	-	TAXID:4442	Naringenin
O94956	-	TAXID:4442	Genistein
O94956	-	TAXID:4442	Daidzein
O94956	-	TAXID:4442	Caffeine
O94956	-	TAXID:4577	Quercetin
O94956	-	TAXID:4577	Naringenin
O94956	-	TAXID:3494	Xanthotoxin
O94956	-	TAXID:36610	Quercetin
O94956	-	TAXID:4682	Quercetin
O94956	-	TAXID:35925	Quercetin
O94956	-	TAXID:3712	Quercetin
O94956	-	TAXID:114280	Quercetin
O94956	-	TAXID:4045	Quercetin
O94956	-	TAXID:4045	Xanthotoxin
O94956	-	TAXID:4679	Quercetin
O94956	-	TAXID:4047	Quercetin
O94956	-	TAXID:4047	Xanthotoxin
O94956	-	TAXID:4041	Xanthotoxin
O94956	-	TAXID:13216	Dextromethorphan
O94956	-	TAXID:13216	Paroxetine
O94956	-	TAXID:171929	Ouabain
O94956	-	TAXID:175228	Quercetin
O94956	-	TAXID:4550	Isonicotinic Acid Hydrazide
O94956	-	TAXID:3641	Caffeine
O94956	-	TAXID:4146	Quercetin
O94956	-	TAXID:3469	Quercetin
O94956	-	TAXID:3469	Sanguinarine
O94956	-	TAXID:3469	Phenylbutazone
O94956	-	TAXID:4530	Quercetin
O94956	-	TAXID:3621	Cholestatic
O94956	-	TAXID:3621	Sodium Cholate
O94956	-	TAXID:3621	Sodium Taurocholate
O94956	-	TAXID:29780	Quercetin
O94956	-	TAXID:3649	Xanthotoxin
O94956	-	TAXID:3649	Daidzein
O94956	-	TAXID:4006	Sodium Cholate
O94956	-	TAXID:48038	Quercetin
O94956	-	TAXID:48038	Xanthotoxin
O94956	-	TAXID:32247	Quercetin
O94956	-	TAXID:157791	Nicotine
O94956	-	TAXID:85571	Naringin
O94956	-	TAXID:49827	Naringenin
O94956	-	TAXID:49827	Glycyrrhizin
O94956	-	TAXID:49827	Clarithromycin
O94956	-	TAXID:3747	Quercetin
O94956	-	TAXID:3747	Naringenin
O94956	-	TAXID:3747	Naringin
O94956	-	TAXID:51089	CHEBI:2904;CHEBI:55352;CHEMLIST:4248898;CID:2249
O94956	-	TAXID:94328	Xanthotoxin
O94956	-	TAXID:4565	Quercetin
O94956	-	TAXID:4236	Gemfibrozil
O94956	-	TAXID:4236	Quercetin
O94956	-	TAXID:50225	Quercetin
O94956	-	TAXID:3885	Quercetin
O94956	-	TAXID:74645	Quercetin
O94956	-	TAXID:4681	Quercetin
O94956	-	TAXID:4072	Quercetin
O94956	-	TAXID:180772	Quercetin
O94956	-	TAXID:13427	Quercetin
O94956	-	TAXID:3888	Quercetin
O94956	-	TAXID:3888	Naringenin
O94956	-	TAXID:3888	Naringin
O94956	-	TAXID:3888	Daidzein
O94956	-	TAXID:3708	Quercetin
O94956	-	TAXID:3708	Naringenin
O94956	-	TAXID:4498	Nicotine
O94956	-	TAXID:4202	Amantadine
O94956	-	TAXID:120290	Quercetin
O94956	-	TAXID:120290	Naringenin
O94956	-	TAXID:33125	Carbamazepine
O94956	-	TAXID:22663	Quercetin
O94956	-	TAXID:3847	Genistein
O94956	-	TAXID:3847	Coumestrol
O94956	-	TAXID:3847	Daidzein
O94956	-	TAXID:3847	Quercetin
O94956	-	TAXID:3847	Naringenin
O94956	-	TAXID:3847	Sodium Cholate
O94956	-	TAXID:3711	Quercetin
O94956	-	TAXID:3711	2-Phenylethylisothiocyanate
O94956	-	TAXID:3659	Quercetin
O94956	-	TAXID:3617	Quercetin
O94956	-	TAXID:2711	Nootkatone
O94956	DB00836	-	-
O94956	DB04572	-	-
O94956	DB00834	-	-
O94956	DB00783	-	-
O94956	DB01149	-	-
O94956	DB01092	-	-
O94956	DB04574	-	-
O94956	DB00421	-	-
O94956	DB00936	-	-
O94956	DB00655	-	-
O94956	DB01140	-	-
O94956	DB01098	-	-
O94956	DB00541	-	-
O94956	DB00252	-	-
O94956	DB01016	-	-
O94956	DB00257	-	-
O94956	DB00255	-	-
O94956	DB00313	-	-
O94956	DB01095	-	-
O94956	DB00091	-	-
O94956	DB00495	-	-
O94956	DB00490	-	-
O94956	DB00499	-	-
O94956	DB00321	-	-
O94956	DB00390	-	-
O94956	DB01156	-	-
O94956	DB00622	-	-
O94956	DB00437	-	-
O94956	DB00625	-	-
O94956	DB00624	-	-
O94956	DB00532	-	-
O94956	DB00530	-	-
O94956	DB01241	-	-
O94956	DB00300	-	-
O94956	DB00966	-	-
O94956	DB00227	-	-
O94956	DB00224	-	-
O94956	DB01051	-	-
O94956	DB00220	-	-
O94956	DB01394	-	-
O94956	DB01151	-	-
O94956	DB00564	-	-
O94956	DB00762	-	-
O94956	DB00812	-	-
O94956	DB00813	-	-
O94956	DB00177	-	-
O94956	DB00176	-	-
O94956	DB00175	-	-
O94956	DB01076	-	-
O94956	DB01167	-	-
O94956	DB01165	-	-
O94956	DB00396	-	-
O94956	DB01162	-	-
O94956	DB00701	-	-
O94956	DB00679	-	-
O94956	DB00277	-	-
O94956	DB01273	-	-
O94956	DB00759	-	-
O94956	DB00284	-	-
O94956	DB01326	-	-
O94956	DB00960	-	-
O94956	DB00795	-	-
O94956	DB00822	-	-
O94956	DB06729	-	-
O94956	DB00641	-	-
O94956	DB01067	-	-
O94956	DB00412	-	-
O94956	DB00514	-	-
O94956	DB00555	-	-
O94956	DB01171	-	-
O94956	DB01174	-	-
O94956	DB01222	-	-
O94956	DB00553	-	-
O94956	DB00243	-	-
O94956	DB00335	-	-
O94956	DB01026	-	-
O94956	DB00554	-	-
O94956	DB00489	-	-
O94956	DB00897	-	-
O94956	DB00951	-	-
O94956	DB00950	-	-
O94956	DB00973	-	-
O94956	DB00613	-	-
O94956	DB00509	-	-
O94956	DB00975	-	-
O94956	DB01211	-	-
O94956	DB00503	-	-
O94956	DB00602	-	-
O94956	DB01053	-	-
O94956	DB00698	-	-
O94956	DB01050	-	-
O94956	DB00451	-	-
O94956	DB00468	-	-
O94956	DB00695	-	-
O94956	DB00216	-	-
O94956	DB00196	-	-
O94956	DB08860	-	-
O94956	DB00356	-	-
O94956	DB00199	-	-
O94956	DB00590	-	-
O94956	DB00829	-	-
O94956	DB00860	-	-
O94956	DB01072	-	-
O94956	DB01115	-	-
O94956	DB00715	-	-
O94956	DB01045	-	-
O94956	DB00773	-	-
O94956	DB01204	-	-
O94956	DB00477	-	-
O94956	DB00472	-	-
O94956	DB00661	-	-
O94956	DB00577	-	-
O94956	DB01601	-	-
O94956	DB01197	-	-
O94956	DB00571	-	-
O94956	DB00570	-	-
O94956	DB00184	-	-
O94956	DB00264	-	-
O94956	DB00341	-	-
O94956	DB00342	-	-
O94956	DB00343	-	-
O94956	DB00345	-	-
O94956	DB00583	-	-
O94956	DB00879	-	-
O94956	DB00586	-	-
O94956	DB00584	-	-
O94956	DB00675	-	-
O94956	DB00915	-	-
O94956	DB00914	-	-
O94956	DB00917	-	-
O94956	DB00637	-	-
O94956	DB00912	-	-
O94956	DB01234	-	-
O94956	DB01124	-	-
O94956	DB01035	-	-
O94956	DB01232	-	-
O94956	DB00722	-	-
O94956	DB01030	-	-
O94956	DB01032	-	-
O94956	DB00331	-	-
O94956	DB00445	-	-
O94956	DB01039	-	-
O94956	DB01239	-	-
O94956	DB00440	-	-
O94956	DB00563	-	-
O94956	DB00270	-	-
O94956	DB00904	-	-
O94956	DB01137	-	-
O94956	DB00289	-	-
O94956	DB01229	-	-
O94956	DB01132	-	-
O94956	DB00608	-	-
O94956	DB00443	-	-
O94956	DB00280	-	-
O94956	DB00908	-	-
O94956	DB01223	-	-
O94956	DB00458	-	-
O94956	DB00752	-	-
O94956	DB00328	-	-
O94956	DB01023	-	-
O94956	DB00482	-	-
O94956	DB01346	-	-
O94956	DB00683	-	-
O94956	DB00682	-	-
O94956	DB00455	-	-
O94956	DB00457	-	-
O94956	DB00204	-	-
O94956	DB00206	-	-
O94956	DB00201	-	-
O94956	DB00997	-	-
O94956	DB00208	-	-
Q86VL8	-	TAXID:3760	9-Amino-1234-Tetrahydroacridine
Q86VL8	DB00904	-	-
Q86VL8	DB00382	-	-
Q86VL8	DB00975	-	-
Q86VL8	DB00280	-	-
Q86VL8	DB00908	-	-
Q86VL8	DB00413	-	-
Q86VL8	DB00458	-	-
Q86VL8	DB01173	-	-
Q86VL8	DB00331	-	-
Q86VL8	DB01346	-	-
Q86VL8	DB00468	-	-
Q9UNQ0	-	TAXID:120290	Quercetin
Q9UNQ0	-	TAXID:32247	Quercetin
Q9UNQ0	-	TAXID:4682	Quercetin
Q9UNQ0	-	TAXID:3712	Quercetin
Q9UNQ0	-	TAXID:4681	Quercetin
Q9UNQ0	-	TAXID:29780	Quercetin
Q9UNQ0	-	TAXID:29760	Quercetin
Q9UNQ0	-	TAXID:74900	Quercetin
Q9UNQ0	-	TAXID:3747	Quercetin
Q9UNQ0	-	TAXID:3888	Quercetin
Q9UNQ0	-	TAXID:4565	Quercetin
Q9UNQ0	-	TAXID:4072	Quercetin
Q9UNQ0	-	TAXID:4236	Quercetin
Q9UNQ0	-	TAXID:36610	Quercetin
Q9UNQ0	-	TAXID:4577	Quercetin
Q9UNQ0	-	TAXID:35925	Quercetin
Q9UNQ0	-	TAXID:50225	Quercetin
Q9UNQ0	-	TAXID:3885	Quercetin
Q9UNQ0	-	TAXID:114280	Quercetin
Q9UNQ0	-	TAXID:74645	Quercetin
Q9UNQ0	-	TAXID:4045	Quercetin
Q9UNQ0	-	TAXID:4679	Quercetin
Q9UNQ0	-	TAXID:4047	Quercetin
Q9UNQ0	-	TAXID:180772	Quercetin
Q9UNQ0	-	TAXID:13427	Quercetin
Q9UNQ0	-	TAXID:4081	Quercetin
Q9UNQ0	-	TAXID:4530	Quercetin
Q9UNQ0	-	TAXID:175228	Quercetin
Q9UNQ0	-	TAXID:4442	Quercetin
Q9UNQ0	-	TAXID:48038	Quercetin
Q9UNQ0	-	TAXID:3847	Quercetin
Q9UNQ0	-	TAXID:4146	Quercetin
Q9UNQ0	-	TAXID:22663	Quercetin
Q9UNQ0	-	TAXID:3708	Quercetin
Q9UNQ0	-	TAXID:3469	Quercetin
Q9UNQ0	-	TAXID:3711	Quercetin
Q9UNQ0	-	TAXID:3659	Quercetin
Q9UNQ0	-	TAXID:3617	Quercetin
Q9UNQ0	-	TAXID:4222	Quercetin
Q9UNQ0	DB00783	-	-
Q9UNQ0	DB04574	-	-
Q9UNQ0	DB00762	-	-
Q9UNQ0	DB00158	-	-
Q9UNQ0	DB00619	-	-
Q9UNQ0	DB00396	-	-
Q9UNQ0	DB00175	-	-
Q9UNQ0	DB00709	-	-
Q9UNQ0	DB01051	-	-
Q9UNQ0	DB01094	-	-
Q9UNQ0	DB01030	-	-
Q9UNQ0	DB01016	-	-
Q9UNQ0	DB00445	-	-
Q9UNQ0	DB00563	-	-
Q9UNQ0	DB00705	-	-
Q9UNQ0	DB00694	-	-
Q9UNQ0	DB00255	-	-
Q9UNQ0	DB00238	-	-
Q9UNQ0	DB00741	-	-
Q9UNQ0	DB00317	-	-
Q9UNQ0	DB00091	-	-
Q9UNQ0	DB00495	-	-
Q9UNQ0	DB00503	-	-
Q9UNQ0	DB00655	-	-
Q9UNQ0	DB00622	-	-
Q9UNQ0	DB00773	-	-
Q9UNQ0	DB01204	-	-
Q9UNQ0	DB00624	-	-
Q9UNQ0	DB01162	-	-
Q9UNQ0	DB00328	-	-
Q9UNQ0	DB00530	-	-
Q9UNQ0	DB00625	-	-
Q9UNQ0	DB00661	-	-
Q9UNQ0	DB00457	-	-
Q9UNQ0	DB00206	-	-
Q9UNQ0	DB00970	-	-
Q9UNQ0	DB01232	-	-
Q9UNQ0	DB00997	-	-
Q9UNQ0	DB00343	-	-
Q9UNQ0	DB00220	-	-
Q9UNQ0	DB00116	-	-
Q9UNQ0	DB00675	-	-
Q01959	-	TAXID:13216	Paroxetine
Q01959	DB01064	-	-
Q01959	DB01097	-	-
Q01959	DB00153	-	-
Q01959	DB00709	-	-
Q01959	DB00258	-	-
Q01959	DB00259	-	-
Q01959	DB00252	-	-
Q01959	DB00701	-	-
Q01959	DB00251	-	-
Q01959	DB00704	-	-
Q01959	DB00257	-	-
Q01959	DB00254	-	-
Q01959	DB00255	-	-
Q01959	DB00313	-	-
Q01959	DB00310	-	-
Q01959	DB00316	-	-
Q01959	DB00091	-	-
Q01959	DB00319	-	-
Q01959	DB00478	-	-
Q01959	DB00570	-	-
Q01959	DB00882	-	-
Q01959	DB01156	-	-
Q01959	DB01151	-	-
Q01959	DB00650	-	-
Q01959	DB00227	-	-
Q01959	DB00224	-	-
Q01959	DB00222	-	-
Q01959	DB00220	-	-
Q01959	DB00962	-	-
Q01959	DB06710	-	-
Q01959	DB03255	-	-
Q01959	DB00178	-	-
Q01959	DB01075	-	-
Q01959	DB00176	-	-
Q01959	DB01077	-	-
Q01959	DB01076	-	-
Q01959	DB00672	-	-
Q01959	DB00674	-	-
Q01959	DB00675	-	-
Q01959	DB00679	-	-
Q01959	DB01275	-	-
Q01959	DB00795	-	-
Q01959	DB00794	-	-
Q01959	DB00793	-	-
Q01959	DB00823	-	-
Q01959	DB00822	-	-
Q01959	DB00415	-	-
Q01959	DB00829	-	-
Q01959	DB00411	-	-
Q01959	DB00412	-	-
Q01959	DB00798	-	-
Q01959	DB00555	-	-
Q01959	DB00554	-	-
Q01959	DB00550	-	-
[truncated: 1,488 more rows]
