# Supplementary material for: Developing a Molecular Roadmap of Drug-Food Interactions
Source: PLoS Comput Biol. 2015 Feb 10;11(2):e1004048. doi: 10.1371/journal.pcbi.1004048 (PMC4323218; doi:10.1371/journal.pcbi.1004048)
Supplement: S5 Table — 9 foods with significant gene expression signatures and known phytochemical composition. (XLSX) [file pcbi.1004048.s005.xlsx]

## Sheet: Microarray data sets
AccessionID	Food	Species	Cell/Strain/Tissue	Platform	Raw	Processed
E-MEXP-1372	broccoli	Homo sapiens	Colon epithelial Caco2 cells (adenocrcinoma)	Affymetrix GeneChip Human Genome U133 Plus 2.0	Y	Y
E-GEOD-36930	grape extract	Homo sapiens	Peripheral blood mononuclear cells,blood	Affymetrix GeneChip Human Gene 1.0 ST Array [HuGene-1_0-st-v1]	Y	Y
E-MEXP-2030	kiwi	Homo sapiens	blood,whole organism	Affymetrix GeneChip Human Genome U133 Plus 2.0	Y	Y
E-GEOD-15322	orange	Homo sapiens	Human colon cells (CCD-18Co)	Affymetrix GeneChip Human Genome U133 Plus 2.0	Y	Y
E-MEXP-1243	peas	Homo sapiens	Prostate	Affymetrix GeneChip Human Genome U133 Plus 2.0	Y	N
E-GEOD-21417	persimmon	Rattus norvegicus	Strain Goto-Kakizaki, liver	Affymetrix GeneChip Rat Genome 230 2.0 [Rat230_2]	Y	Y
E-GEOD-33005	corn oil	Rattus norvegicus	Strain Wistar, thymus	Agilent-028282 Whole Rat Genome Microarray 4x44K v3	Y	Y
E-GEOD-40334	garlic (oil)	Mus musculus	Liver	Illumina MouseRef-8 v2.0 Expression BeadChip	Y	Y
E-GEOD-10590	olive oil	Homo sapiens	Peripheral blood mononuclear cells,blood	ABI Human Genome Survey Microarray V2.0	Y	Y
